# Supplementary material for: Diverse secondary C(sp3)–H bond functionalization via site-selective trifluoroacetoxylation of aliphatic amines
Source: PubMed Central journal article supplement — Chem Sci. 2018 Jun 28;9(30):6374–8. doi: 10.1039/c8sc01788c (PMC6115674; doi:10.1039/c8sc01788c), 2018-06-28

## Supporting Information

### Diverse Secondary C(*sp*<sup>3</sup>)-H bond functionalization *via* Site-Selective Trifluoroacetylation of Aliphatic Amines

Yongzhen Tang, Yuman Qin, Dongmei Meng, Chaoqun Li, Junfa Wei and Mingyu  
Yang \*

*Key Laboratory of Applied Surface and Colloid Chemistry of MOE & School of Chemistry  
and Chemical Engineering Shaanxi Normal University, 620 West Chang'an Ave, Xi'an,  
710119, China*

yangmy05@snnu.edu.cn; yangmy05@gmail.com

#### Table of Contents

|                                                                   |          |
|-------------------------------------------------------------------|----------|
| Instrumentation and Chemicals                                     | S1–S2    |
| Preparation of amides                                             | S2–S6    |
| Characterization Data for amides                                  | S7–S25   |
| Site-Selective Oxidation Trifluoroacetylation of Aliphatic Amines | S26      |
| Characterization Data for Products                                | S26–S46  |
| Late-stage functionalization of Steroidal compounds               | S46–S51  |
| Comparative experiments                                           | S52–S55  |
| Mechanism studies                                                 | S55–S61  |
| References                                                        | S61      |
| NMR Spectra                                                       | S62–S164 |

## Instrumentation and Chemical

NMR spectra were recorded on Bruker 400 and 600 M spectrometers, operating at 400 and 600 MHz for  $^1\text{H}$  NMR and 100 and 150 MHz for  $^{13}\text{C}$  NMR spectrophotometer using  $\text{CDCl}_3$  and TMS as the internal standard. Chemical shift values for  $^1\text{H}$  and  $^{13}\text{C}$  are referenced to residual solvent peaks ( $\text{CHCl}_3$  in  $\text{CDCl}_3$ : 7.26 ppm for  $^1\text{H}$ , 77.00 ppm for  $^{13}\text{C}$ ); Chemical shifts are reported in  $\delta$  ppm. All coupling constants ( $J$  values) were reported in Hertz (Hz). Data for  $^1\text{H}$  NMR spectra are reported as follows: chemical shift (ppm, referenced to TMS; s = singlet, d = doublet, t = triplet, q = quartet, dd = doublet of doublets, dt = doublet of triplets, m = multiplet), coupling constant (Hz) and integration. Column chromatography was performed on silica gel 200-300 mesh. High-resolution mass spectra (HRMS) were recorded on electron-spray ionization (ESI) technique.

All reactions were carried out under nitrogen atmosphere. Materials were obtained from commercial suppliers or prepared according to standard notepcedures unless otherwise noted.  $\text{CuI}$  was purchased from Energy Chemical Reagent Co., Ltd.,  $\text{PhI}(\text{OTFA})_2$  was purchased from Beijing Innochem Science & Technology Co., Ltd. Tetrabutylammonium bromide (TBAB) was purchased from Tokyo Chemical Industry Co., Ltd. DCM was freshly distilled over  $\text{CaH}_2$  under  $\text{N}_2$ .

### General Procedure: Preparation of aliphatic amides Procedure A

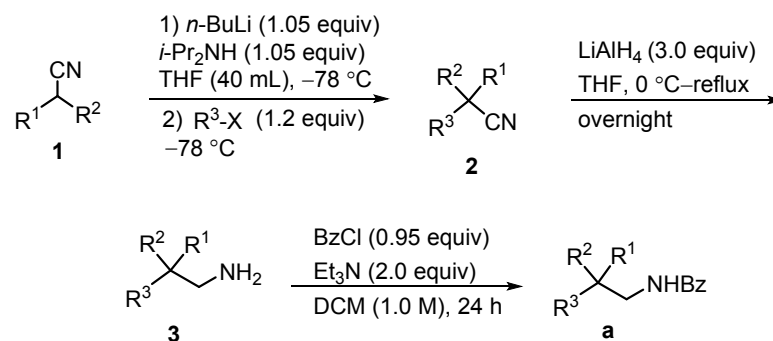

$n\text{-BuLi}$  in hexane (2.5 M, 20 mmol, 1.05 equiv) was added dropwise to a solution of  $i\text{-}$

Pr<sub>2</sub>NH (3.5 mL, 21.0 mmol, 1.05 equiv) in THF (40 mL) at -78 °C and stirred for 0.5 h. Then alkyl nitrile **1** (20 mmol, 1.0 equiv) was added dropwise to the resulting LDA solution at -78 °C and stirred at this temperature for 1 h. Alkyl halide (30 mmol, 1.5 equiv) was then added dropwise to the solution at -78 °C. After the addition, the mixture was warmed to room temperature and stirred overnight. After down, the mixture was quenched with saturated aqueous NH<sub>4</sub>Cl, and extracted with EtOAc (20 mL × 3). Combined extracts were washed with water, brine solution and dried with anhydrous Na<sub>2</sub>SO<sub>4</sub>. Solvent was evaporated in Rota-evaporator. The residue was purified by silica gel chromatography (2%–10% EtOAc/petroleum ether) to provide corresponding nitrile **2**.

LiAlH<sub>4</sub> (2.28 g, 60 mmol, 3.0 equiv) was slowly added to the solution of crude nitrile in THF (30 mL) at room temperature. Then the mixture was heated to 88 °C for 24 hours. After that, the reaction was cooled down, the Na<sub>2</sub>SO<sub>4</sub> • 10H<sub>2</sub>O was added slowly until the mixture was clear to quench the reaction, filtered, solid was washed with Et<sub>2</sub>O, the combined ether solution was concentrated in vacuo to give the desired amide **3**.

To a solution of amine **3** (10 mmol, 1.0 equiv) in dichloromethane (20 mL) was added triethylamine (2.78 mL, 20 mmol, 2.0 equiv) at 0 °C. Benzoyl chloride (1.34 g, 9.5 mmol, 0.95 equiv) was added dropwise. Then the mixture was stirring overnight at room temperature. Then the mixture was quenched by water (20 mL). The organic layer was separated and the aqueous layer was extracted with dichloromethane (20 mL × 2). The combined organic phase was washed with brine (30 mL), and then dried with anhydrous Na<sub>2</sub>SO<sub>4</sub>. Evaporation and column chromatography on silica gel (ethyl acetate/hexane = 1:100–1:5 as eluent) afforded corresponding amides **a** as white solid. Aliphatic amide substrates **PG 2-PG 6**, **PG 8-PG 13**, **2a-2f**, **2k-2u**, **2ag** were prepared according to the procedure A.

**PG 7** can be found in reference 1.

#### **Procedure B**

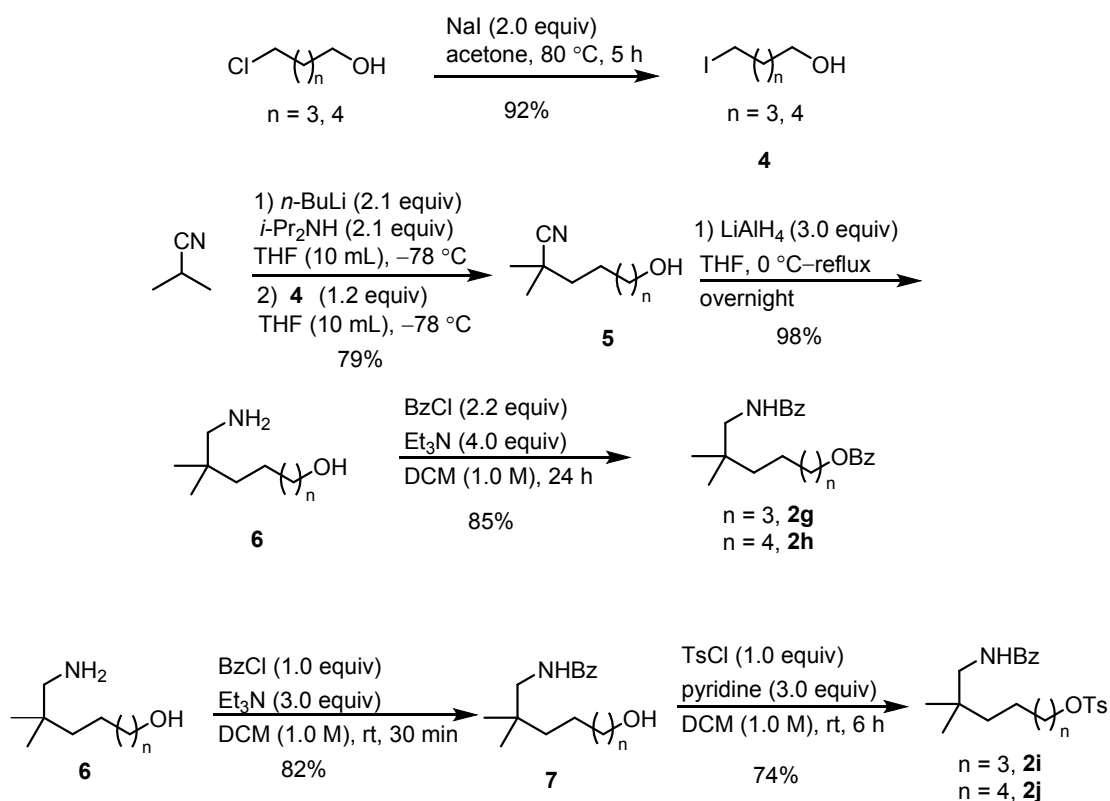

To a solution of 5-chloropentan-1-ol (20 mmol, 1.0 equiv) in acetone (20 mL) was added NaI (40 mmol, 2.0 equiv). Then the mixture was reflux for 5 hours until the 5-chloropentan-1-ol was consumed. Evaporation and column chromatography on silica gel (EA/PE/DCM = 1:20:0.5 as eluent) afforded corresponding **4** as colorless oil.

Follow procedure A to give the aliphatic amides **2g** and **2h**.

To a solution of amino alcohol **6** (10 mmol, 1.0 equiv) in dichloromethane (10 mL) was added triethylamine (4.17 mL, 30 mmol, 3.0 equiv) at room temperature. Benzoyl chloride (1.34 g, 9.5 mmol, 0.95 equiv) was added dropwise under the same temperature. Then the mixture was stirring for 30 min at room temperature (detected by TLC). After that, the mixture was quenched by water (20 mL). The organic layer was separated and the aqueous layer was extracted with dichloromethane (20 mL  $\times$  2). The combined organic phase was washed with brine (30 mL), and then dried over  $\text{Na}_2\text{SO}_4$ . Evaporation and column chromatography on silica gel (EA/PE/DCM = 1:2:1 as eluent) afforded amino protected compound **7** as white solid. Compound **7** (10 mmol, 1.0 equiv) was dissolved in the DCM (10 mL), pyridine (2.41 mL, 30 mmol,



3.0 equiv) was added dropwise at 0 °C, then Tosyl Chloride (10 mmol, 1.0 equiv) was added portion wise. The mixture was stirring for 24 h. After that, the mixture was quenched by water (20 mL). The organic layer was separated and the aqueous layer was extracted with dichloromethane (20 mL × 2). The combined organic phase was washed with brine (30 mL), and then dried over Na<sub>2</sub>SO<sub>4</sub>. Evaporation and column chromatography on silica gel (EA/PE/DCM = 1:10:0.5 as eluent) to give the desired product **2i** and **2j**.

**Procedure C:**

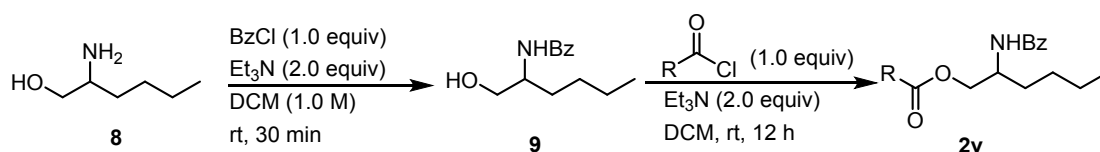

The amino alcohol **8** (20 mmol, 1.0 equiv) was dissolved in DCM (20 mL), Et<sub>3</sub>N (5.6 mL, 40 mmol, 2.0 equiv) was added dropwise, then BzCl was added at room temperature, the reaction mixture was stirring for 30 min. After that, the mixture was quenched by water (20 mL). The organic layer was separated and the aqueous layer was extracted with dichloromethane (20 mL × 2). The combined organic phase was washed with brine (30 mL), and then dried over Na<sub>2</sub>SO<sub>4</sub>. Evaporation and column chromatography on silica gel (EA/PE/DCM = 1:20:0.5 as eluent) afforded amino protected compound **9** as white solid. Compound **9** was followed the same procedure as above to give **2v** as a white solid.

**2w-2y, 2z, 2aa** were prepared as the above procedure C.

**2ab**<sup>2</sup>, **2ac**<sup>2</sup>, **2ad**<sup>2</sup>, **2af**<sup>3</sup> were synthesized according to previous reported procedure.

Preparation of **2ak**:

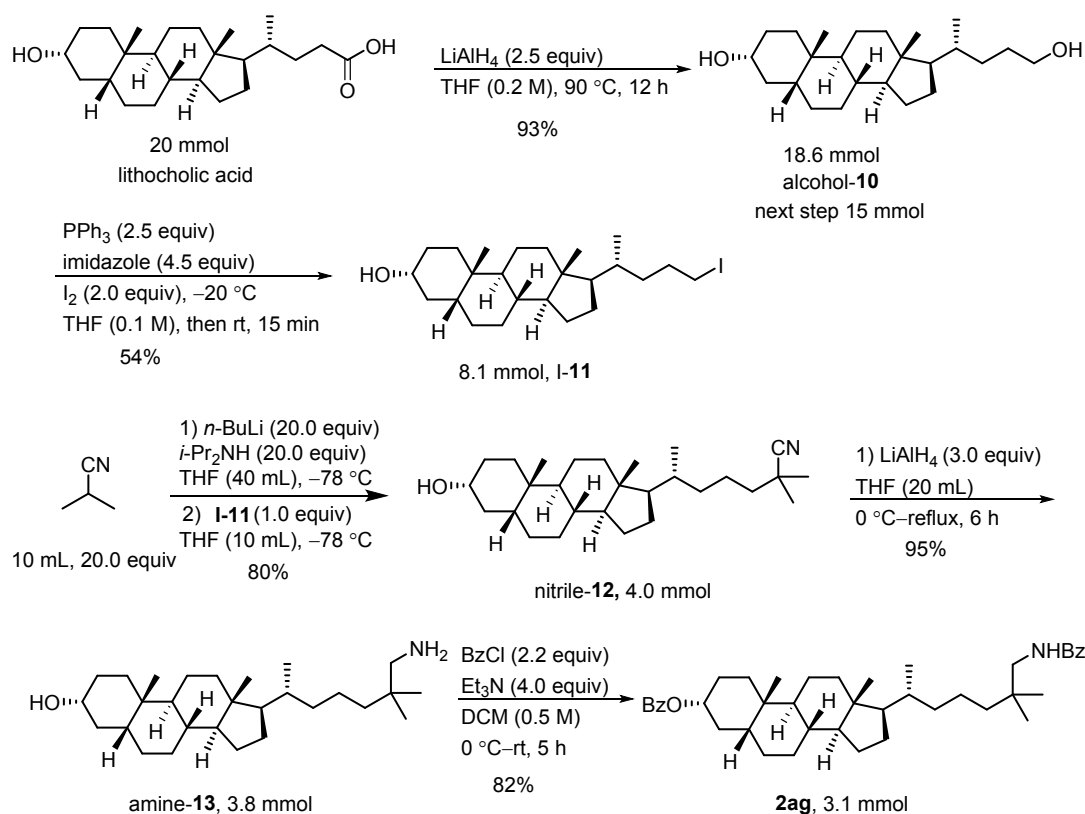

Lithocholic acid (7.53 g, 20 mmol, 1.0 equiv) was dissolved in THF (100 mL),  $\text{LiAlH}_4$  (1.9 g, 50 mmol, 2.5 equiv) was added portion wise under  $0^\circ\text{C}$ , then the mixture was refluxing for 12 h. After that, the reaction was cooled down, the  $\text{Na}_2\text{SO}_4 \cdot 10\text{H}_2\text{O}$  was added slowly until the mixture was clear to quench the reaction, filtered, solid was washed with  $\text{Et}_2\text{O}$ , the combined ether solution was concentrated in vacuo to give the alcohol-10.

$\text{PPh}_3$  (9.83 g, 37.5 mmol, 2.5 equiv) and 1*H*-imidazole (4.6 g, 67.5 mmol, 4.5 equiv) were successively added to a soln. of alcohol-10 (5.43 g, 15 mmol, 1.0 equiv) in THF (150 mL). The mixture was cooled to  $-20^\circ\text{C}$  and  $\text{I}_2$  (7.61 g, 30 mmol, 2.0 equiv) was added in three portions each 5 min. After 15 min, the mixture was removed from the cooling bath and stirred for 30 min at rt. The reaction was quenched by slow addition of sat.  $\text{NaHCO}_3$  soln. (15 mL) and sat.  $\text{Na}_2\text{S}_2\text{O}_3$  soln. (15 mL). The aq. Layer was extracted with  $\text{EtOAc}$  (25 mL  $\times$  3), the combined organic layer dried over  $\text{Na}_2\text{SO}_4$ . Evaporation and column chromatography on silica gel (EA/PE/DCM = 1:8:0.5 as eluent) afforded I-11.

Then followed the procedure A afforded the product **2ag**.

### Characterization Data for amides

#### *N*-(2,2-dimethylhexyl)benzamide (**2a**, *PG 1*)

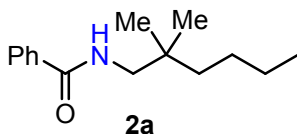

White solid. mp: 71.8–73.0 °C;  $^1\text{H NMR}$  (600 MHz,  $\text{CDCl}_3$ )  $\delta$  7.75 (d,  $J = 6.0$  Hz, 2H), 7.50 (t,  $J = 6.0$  Hz, 1H), 7.44 (dd,  $J = 6.0, 6.0$  Hz, 2H), 6.09 (br s, 1H), 3.30 (d,  $J = 6.0$  Hz, 2H), 1.24–1.30 (m, 6H), 0.95 (s, 6H), 0.91 (t,  $J = 6.0$  Hz, 3H).  $^{13}\text{C NMR}$  (150 MHz,  $\text{CDCl}_3$ )  $\delta$  167.59, 135.01, 131.09, 128.37, 126.74, 49.47, 39.72, 34.38, 26.00, 24.91, 23.42, 13.99. **HRMS–ESI** ( $m/z$ ):  $[\text{M}+\text{Na}]^+$  calcd. for  $\text{C}_{15}\text{H}_{23}\text{NNaO}$ , 256.1672; found, 256.1675. **IR** (KBr,  $\text{cm}^{-1}$ ):  $\nu$  3414, 1637, 1400, 1118, 617.

#### *N*-(2,2-dimethylhexyl)-4-methylbenzamide (*PG 2*)

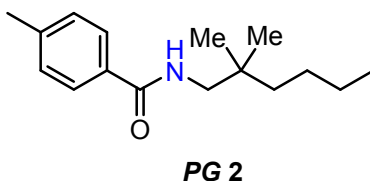

White solid. mp: 68.2–68.6 °C;  $^1\text{H NMR}$  (600 MHz,  $\text{CDCl}_3$ )  $\delta$  7.66 (d,  $J = 7.9$  Hz, 2H), 7.23 (d,  $J = 7.8$  Hz, 2H), 6.13 (br s, 1H), 3.28 (d,  $J = 6.3$  Hz, 2H), 2.39 (s, 3H), 1.21–1.34 (m, 6H), 0.93 (s, 6H), 0.90 (t,  $J = 6.6$  Hz, 3H).  $^{13}\text{C NMR}$  (150 MHz,  $\text{CDCl}_3$ )  $\delta$  167.52, 141.61, 132.17, 129.17, 126.74, 49.44, 39.76, 34.39, 26.08, 25.00, 23.51, 21.39, 14.10. **HRMS–ESI** ( $m/z$ ):  $[\text{M}+\text{Na}]^+$  calcd. for  $\text{C}_{16}\text{H}_{25}\text{NNaO}$ , 270.1828; found, 270.1821. **IR** (KBr,  $\text{cm}^{-1}$ ):  $\nu$  3474, 3415, 2957, 2925, 1639, 1397, 838.

#### *N*-(2,2-dimethylhexyl)-4-chlorobenzamide (*PG 3*)

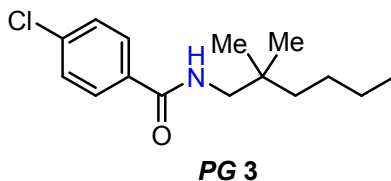

White solid. mp: 89.5–90.0 °C;  $^1\text{H NMR}$  (600 MHz,  $\text{CDCl}_3$ )  $\delta$  7.69 (d,  $J = 8.4$  Hz,

2H), 7.39 (d,  $J = 8.4$  Hz, 2H), 6.25 (br s, 1H), 3.26 (d,  $J = 6.3$  Hz, 2H), 1.21–1.34 (m, 6H), 0.93 (s, 6H), 0.90 (t,  $J = 6.6$  Hz, 3H).  $^{13}\text{C}$  NMR (150 MHz,  $\text{CDCl}_3$ )  $\delta$  166.60, 137.39, 133.36, 128.71, 128.23, 49.61, 39.75, 34.42, 26.05, 24.96, 23.48, 14.08. HRMS–ESI ( $m/z$ ):  $[\text{M}+\text{Na}]^+$  calcd. for  $\text{C}_{15}\text{H}_{22}\text{ClNNaO}$ , 290.1282; found, 290.1275. IR (KBr,  $\text{cm}^{-1}$ ):  $\nu$  3476, 3415, 2961, 2926, 1789, 1637, 1597, 1484, 823.

***N*-(2,2-dimethylhexyl)-4-methoxybenzamide (PG 4)**

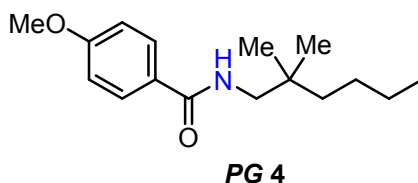

White solid. mp: 86.0–87.3 °C;  $^1\text{H}$  NMR (600 MHz,  $\text{CDCl}_3$ )  $\delta$  7.73 (d,  $J = 8.4$  Hz, 2H), 6.94 (d,  $J = 8.4$  Hz, 2H), 6.01 (br s, 1H), 3.86 (s, 3H), 3.28 (d,  $J = 6.3$  Hz, 2H), 1.23–1.33 (m, 6H), 0.94 (s, 6H), 0.91 (t,  $J = 6.3$  Hz, 3H).  $^{13}\text{C}$  NMR (150 MHz,  $\text{CDCl}_3$ )  $\delta$  167.07, 161.89, 128.51, 127.25, 113.60, 55.29, 49.42, 39.74, 34.38, 26.04, 24.95, 23.47, 14.06. HRMS–ESI ( $m/z$ ):  $[\text{M}+\text{H}]^+$  calcd. for  $\text{C}_{16}\text{H}_{26}\text{NO}_2$ , 264.1958; found, 264.1960. IR (KBr,  $\text{cm}^{-1}$ ):  $\nu$  3415, 1637, 1399, 1251, 1173, 614.

***N*-(2,2-dimethylhexyl)-4-nitrobenzamide (PG 5)**

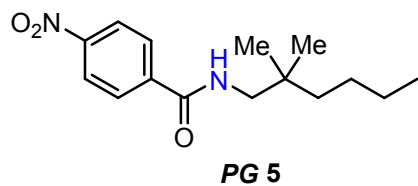

White solid. mp: 73.1–74.2 °C;  $^1\text{H}$  NMR (600 MHz,  $\text{CDCl}_3$ )  $\delta$  8.31 (d,  $J = 8.4$  Hz, 2H), 7.92 (d,  $J = 8.4$  Hz, 2H), 6.12 (br s, 1H), 3.32 (d,  $J = 6.1$  Hz, 2H), 1.26–1.34 (m, 6H), 0.96 (s, 6H), 0.92 (t,  $J = 6.6$  Hz, 3H).  $^{13}\text{C}$  NMR (150 MHz,  $\text{CDCl}_3$ )  $\delta$  165.72, 149.33, 140.64, 128.00, 123.73, 49.88, 39.74, 34.48, 26.04, 24.95, 23.45, 14.06. HRMS–ESI ( $m/z$ ):  $[\text{M}+\text{Na}]^+$  calcd. for  $\text{C}_{15}\text{H}_{22}\text{N}_2\text{NaO}_3$ , 301.1523; found, 301.1515. IR (KBr,  $\text{cm}^{-1}$ ):  $\nu$  3475, 3415, 2927, 1640, 1399, 1108, 866.

***N*-(2,2-dimethylhexyl)-2-nitrobenzamide (PG 6)**

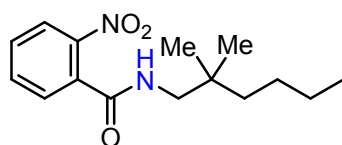

**PG 6**

White solid. mp: 72.3–73.4 °C;  $^1\text{H NMR}$  (600 MHz,  $\text{CDCl}_3$ )  $\delta$  8.07 (d,  $J = 8.1$  Hz, 1H), 7.68 (t,  $J = 7.5$  Hz, 1H), 7.59 (t,  $J = 7.8$  Hz, 1H), 7.53 (d,  $J = 7.5$  Hz, 1H), 5.78 (br s, 1H), 3.32 (d,  $J = 6.3$  Hz, 2H), 1.22–1.35 (m, 6H), 0.97 (s, 6H), 0.92 (t,  $J = 6.6$  Hz, 3H).  $^{13}\text{C NMR}$  (150 MHz,  $\text{CDCl}_3$ )  $\delta$  166.65, 146.31, 133.58, 133.13, 130.27, 128.67, 124.39, 49.79, 39.67, 34.31, 26.01, 24.89, 23.44, 14.07. **HRMS–ESI** ( $m/z$ ):  $[\text{M}+\text{Na}]^+$  calcd. for  $\text{C}_{15}\text{H}_{22}\text{N}_2\text{NaO}_3$ , 301.1523; found, 301.1515. **IR** (KBr,  $\text{cm}^{-1}$ ):  $\nu$  3416, 1638, 1399, 1119, 616.

***N*-(2,2-dimethylhexyl)-4-methylbenzenesulfonamide (PG 7)**

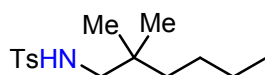

**PG 7**

White solid.  $^1\text{H NMR}$  (400 MHz,  $\text{CDCl}_3$ )  $\delta$  7.74 (d,  $J = 8.1$  Hz, 2H), 7.31 (d,  $J = 8.1$  Hz, 2H), 4.30 (t,  $J = 6.9$  Hz, 1H), 2.68 (d,  $J = 6.9$  Hz, 2H), 2.43 (s, 3H), 1.19–1.25 (m, 2H), 1.09–1.17 (m, 4H), 0.84 (t,  $J = 7.2$  Hz, 3H), 0.82 (s, 6H).

***N*-(2,2-dimethylhexyl)-2,3,4,5,6-pentafluorobenzamide (PG 8)**

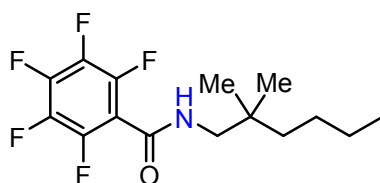

**PG 8**

Yellow solid. mp: 31.9–33.4 °C;  $^1\text{H NMR}$  (600 MHz,  $\text{CDCl}_3$ )  $\delta$  5.86 (br s, 1H), 3.30 (d,  $J = 6.3$  Hz, 2H), 1.22–1.33 (m, 6H), 0.94 (s, 6H), 0.91 (t,  $J = 6.9$  Hz, 3H).  $^{13}\text{C NMR}$  (150 MHz,  $\text{CDCl}_3$ )  $\delta$  157.43, 49.87, 39.55, 34.30, 26.01, 24.85, 23.44, 14.01. **HRMS–ESI** ( $m/z$ ):  $[\text{M}+\text{Na}]^+$  calcd. for  $\text{C}_{15}\text{H}_{18}\text{F}_5\text{NNaO}$ , 346.1201; found, 346.1192.

**IR** (KBr,  $\text{cm}^{-1}$ ):  $\nu$  3474, 3415, 1620, 1399, 1115, 618.

***N*-(2,2-dimethylhexyl)picolinamide (PG 9)**

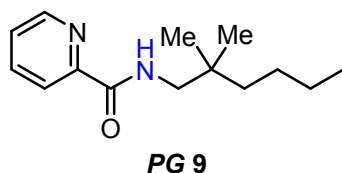

Yellow oil;  $^1\text{H NMR}$  (600 MHz,  $\text{CDCl}_3$ )  $\delta$  8.56 (d,  $J = 4.2$  Hz, 1H), 8.21 (d,  $J = 7.8$  Hz, 1H), 8.17 (br s, 1H), 7.85 (t,  $J = 7.8$  Hz, 1H), 7.43 (t,  $J = 6.3$  Hz, 1H), 3.30 (d,  $J = 6.6$  Hz, 2H), 1.23–1.37 (m, 6H), 0.96 (s, 6H), 0.91 (t,  $J = 6.3$  Hz, 3H).  $^{13}\text{C NMR}$  (150 MHz,  $\text{CDCl}_3$ )  $\delta$  164.09, 149.79, 147.82, 137.12, 125.83, 122.01, 49.02, 39.55, 34.31, 25.94, 24.81, 23.33, 13.94. **HRMS–ESI** ( $m/z$ ):  $[\text{M}+\text{Na}]^+$  calcd. for  $\text{C}_{14}\text{H}_{22}\text{N}_2\text{NaO}$ , 257.1624; found, 257.1624. **IR** (KBr,  $\text{cm}^{-1}$ ):  $\nu$  3397, 3060, 2929, 2866, 1680, 1529, 1388, 1293, 624.

***tert*-butyl (2,2-dimethylhexyl)carbamate (PG 10)**

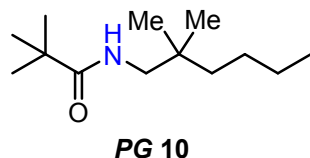

White solid. mp: 72.3–73.4  $^{\circ}\text{C}$ ;  $^1\text{H NMR}$  (600 MHz,  $\text{CDCl}_3$ )  $\delta$  5.63 (br s, 1H), 3.07 (d,  $J = 6.0$  Hz, 2H), 1.26–1.32 (m, 4H), 1.21 (s, 9H), 1.17–1.18 (m, 2H), 0.90 (t,  $J = 7.2$  Hz, 3H), 0.86 (s, 6H).  $^{13}\text{C NMR}$  (150 MHz,  $\text{CDCl}_3$ )  $\delta$  178.20, 48.74, 39.69, 38.83, 34.20, 27.63, 27.05, 26.01, 24.96, 23.48, 14.05. **HRMS–ESI** ( $m/z$ ):  $[\text{M}+\text{Na}]^+$  calcd. for  $\text{C}_{13}\text{H}_{27}\text{NNaO}$ , 236.1985; found, 236.1985. **IR** (KBr,  $\text{cm}^{-1}$ ):  $\nu$  3416, 2961, 1638, 1220, 1184, 702.

***N*-(2,2-dimethylhexyl)acetamide (PG 11)**

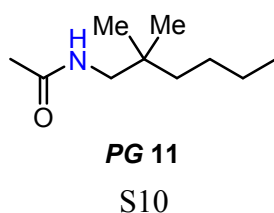

Yellow oil.  $^1\text{H NMR}$  (600 MHz,  $\text{CDCl}_3$ )  $\delta$  5.62 (br s, 1H), 3.07 (d,  $J = 6.3$  Hz, 2H), 2.01 (s, 3H), 1.17–1.30 (m, 6H), 0.90 (t,  $J = 7.2$  Hz, 3H), 0.86 (s, 6H).  $^{13}\text{C NMR}$  (150 MHz,  $\text{CDCl}_3$ )  $\delta$  170.11, 49.22, 39.62, 33.95, 26.01, 24.85, 23.48, 23.40, 14.06. **HRMS–ESI** ( $m/z$ ):  $[\text{M}+\text{Na}]^+$  calcd. for  $\text{C}_{10}\text{H}_{21}\text{NNaO}$ , 194.1515; found, 194.1513. **IR** (KBr,  $\text{cm}^{-1}$ ):  $\nu$  3414, 2960, 2630, 1655, 1556, 1466, 605.

**methyl (2,2-dimethylhexyl)carbamate (PG 12)**

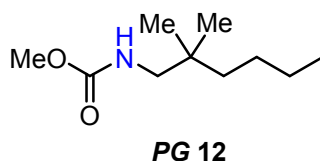

Yellow oil.  $^1\text{H NMR}$  (600 MHz,  $\text{CDCl}_3$ )  $\delta$  4.65 (s, 1H), 3.67 (s, 3H), 3.00 (d,  $J = 6.4$  Hz, 2H), 1.24–1.29 (m, 2H), 1.16–1.24 (m, 4H), 0.90 (t,  $J = 7.2$  Hz, 3H), 0.85 (s, 6H).  $^{13}\text{C NMR}$  (150 MHz,  $\text{CDCl}_3$ )  $\delta$  157.33, 52.02, 51.01, 39.43, 34.16, 26.02, 24.74, 23.51, 14.08. **HRMS–ESI** ( $m/z$ ):  $[\text{M}+\text{Na}]^+$  calcd. for  $\text{C}_{10}\text{H}_{21}\text{NNaO}_2$ , 210.1465; found, 210.1462. **IR** (KBr,  $\text{cm}^{-1}$ ):  $\nu$  3416, 2956, 1638, 1399, 1122, 615.

***N*-(2,2-dimethylhexyl)-2,2,2-trifluoroacetamide (PG 13)**

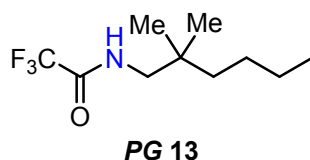

Yellow oil.  $^1\text{H NMR}$  (600 MHz,  $\text{CDCl}_3$ )  $\delta$  6.40 (br s, 1H), 3.19 (d,  $J = 6.3$  Hz, 2H), 1.20–1.36 (m, 6H), 0.90 (t,  $J = 7.2$  Hz, 3H), 0.90 (s, 6H).  $^{13}\text{C NMR}$  (150 MHz,  $\text{CDCl}_3$ )  $\delta$  157.42 (q,  $J = 42.0$  Hz), 115.99 (q,  $J = 285.0$  Hz), 49.50, 39.49, 34.29, 25.95, 24.67, 23.37, 13.96. **HRMS–ESI** ( $m/z$ ):  $[\text{M}+\text{Na}]^+$  calcd. for  $\text{C}_{10}\text{H}_{18}\text{F}_3\text{NNaO}$ , 248.1233; found, 248.1230. **IR** (KBr,  $\text{cm}^{-1}$ ):  $\nu$  3414, 2963, 2934, 1706, 1621, 1592, 1121, 1167, 723.

***N*-(2,2-dimethylpentyl)benzamide (2b)**

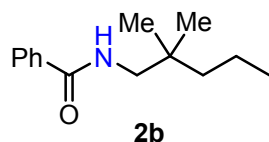

White solid. mp: 70.1–70.4 °C; <sup>1</sup>H NMR (400 MHz, CDCl<sub>3</sub>) δ 7.76 (d, *J* = 8.0 Hz, 2H), 7.50 (t, *J* = 8.0 Hz, 1H), 7.44 (t, *J* = 8.0, 8.0 Hz, 2H), 6.11 (s, 1H), 3.30 (d, *J* = 8.0 Hz, 2H), 1.30–1.37 (m, 2H), 1.21–1.28 (m, 2H), 0.95 (s, 6H), 0.91 (t, *J* = 8.0 Hz, 3H). <sup>13</sup>C NMR (150 MHz, CDCl<sub>3</sub>) δ 167.62, 135.05, 131.24, 128.52, 126.76, 49.55, 42.50, 34.52, 25.00, 17.10, 14.94. HRMS–ESI (*m/z*): [M+H]<sup>+</sup> calcd. for C<sub>14</sub>H<sub>22</sub>NO, 220.1696; found, 220.1699. IR (KBr, cm<sup>-1</sup>): ν 3475, 3414, 1638, 1399, 1119, 618.

***N*-(2,2-dimethyldecyl)benzamide (2c)**

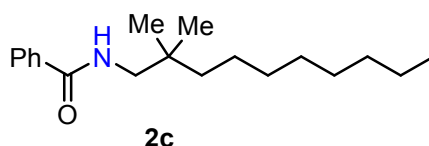

White solid. mp: 55.8–56.1 °C; <sup>1</sup>H NMR (600 MHz, CDCl<sub>3</sub>) δ 7.76 (d, *J* = 6.0 Hz, 2H), 7.50 (t, *J* = 6.0 Hz, 1H), 7.45 (dd, *J* = 6.0, 6.0 Hz, 2H), 6.09 (br s, 1H), 3.30 (d, *J* = 6.0 Hz, 2H), 1.22–1.35 (m, 14H), 0.94 (s, 6H), 0.88 (t, *J* = 6.9 Hz, 3H). <sup>13</sup>C NMR (150 MHz, CDCl<sub>3</sub>) δ 167.62, 135.07, 131.25, 128.53, 126.76, 49.53, 40.08, 34.43, 31.85, 30.48, 29.57, 29.28, 25.01, 23.86, 22.63, 14.09. HRMS–ESI (*m/z*): [M+Na]<sup>+</sup> calcd. for C<sub>19</sub>H<sub>31</sub>NNaO, 312.2298; found, 312.2296. IR (KBr, cm<sup>-1</sup>): ν 3475, 3415, 1638, 1399, 1119, 617.

***N*-(2,2-dimethyltetradecyl)benzamide (2d)**

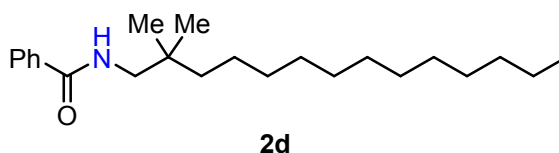

White solid. mp: 58.2–59.0 °C; <sup>1</sup>H NMR (600 MHz, CDCl<sub>3</sub>) δ 7.75 (d, *J* = 6.0 Hz, 2H), 7.50 (t, *J* = 6.0 Hz, 1H), 7.44 (dd, *J* = 6.0, 6.0 Hz, 2H), 6.09 (br s, 1H), 3.30 (d, *J* = 6.0 Hz, 2H), 1.22–1.30 (m, 22H), 0.94 (s, 6H), 0.88 (t, *J* = 6.0 Hz, 3H). <sup>13</sup>C NMR



(150 MHz, CDCl<sub>3</sub>)  $\delta$  167.63, 135.09, 131.22, 128.51, 126.77, 49.55, 40.11, 34.44, 31.87, 30.49, 29.63, 29.62, 29.61, 29.30, 25.01, 23.87, 22.64, 14.07. **HRMS-ESI** ( $m/z$ ): [M+Na]<sup>+</sup> calcd. for C<sub>23</sub>H<sub>39</sub>NNaO, 368.2924; found, 368.2927. **IR** (KBr, cm<sup>-1</sup>):  $\nu$  3550, 3476, 3414, 2959, 2921, 1639, 1537, 1121, 802, 639.

***N*-(2,2-dimethyloctadecyl)benzamide (2e)**

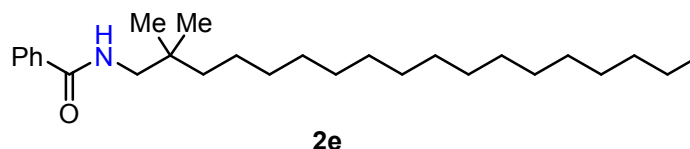

White solid. mp: 71.1–71.8 °C; **<sup>1</sup>H NMR** (600 MHz, CDCl<sub>3</sub>)  $\delta$  7.76 (d,  $J$  = 7.8 Hz, 2H), 7.51 (t,  $J$  = 7.2 Hz, 1H), 7.45 (dd,  $J$  = 7.8, 7.2 Hz, 2H), 6.08 (br s, 1H), 3.30 (d,  $J$  = 6.3 Hz, 2H), 1.21–1.33 (m, 30H), 0.94 (s, 6H), 0.88 (t,  $J$  = 6.9 Hz, 3H). **<sup>13</sup>C NMR** (150 MHz, CDCl<sub>3</sub>)  $\delta$  167.61, 135.14, 131.25, 128.55, 126.77, 49.57, 40.13, 34.45, 31.90, 30.51, 29.67, 29.66, 29.63, 29.33, 25.04, 23.89, 22.66, 14.09. **HRMS-ESI** ( $m/z$ ): [M+Na]<sup>+</sup> calcd. for C<sub>27</sub>H<sub>47</sub>NNaO, 424.3550; found, 424.3552. **IR** (KBr, cm<sup>-1</sup>):  $\nu$  3475, 3415, 2920, 1638, 1399, 1119, 616.

***N*-(5-cyclohexyl-2,2-dimethylpentyl)benzamide (2f)**

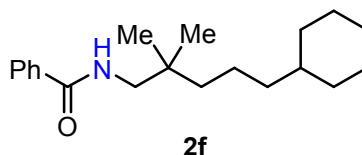

White solid. mp: 112.4–113.0 °C; **<sup>1</sup>H NMR** (600 MHz, CDCl<sub>3</sub>)  $\delta$  7.76 (d,  $J$  = 7.5 Hz, 2H), 7.50 (t,  $J$  = 7.2 Hz, 1H), 7.45 (dd,  $J$  = 7.5, 7.2 Hz, 2H), 6.09 (br s, 1H), 3.29 (d,  $J$  = 6.3 Hz, 2H), 1.59–1.72 (m, 5H), 1.27–1.33 (m, 2H), 1.19–1.25 (m, 5H), 1.11–1.17 (m, , 3H), 0.94 (s, 6H), 0.83–0.88 (m, 2H). **<sup>13</sup>C NMR** (150 MHz, CDCl<sub>3</sub>)  $\delta$  167.59, 135.08, 131.21, 128.50, 126.74, 49.55, 45.71, 40.36, 38.25, 37.52, 34.47, 33.36, 26.65, 26.34, 25.00, 21.00, 8.55. **HRMS-ESI** ( $m/z$ ): [M+Na]<sup>+</sup> calcd. for C<sub>20</sub>H<sub>31</sub>NNaO, 324.2298; found, 324.2297. **IR** (KBr, cm<sup>-1</sup>):  $\nu$  3475, 3414, 2923, 2848, 1639, 1551, 1304, 1106, 705.

### 7-benzamido-6,6-dimethylheptyl benzoate (2g)

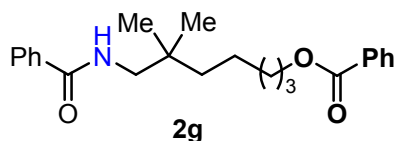

White solid. mp: 57.6–58.2 °C; <sup>1</sup>H NMR (600 MHz, CDCl<sub>3</sub>) δ 8.04 (d, *J* = 6.0 Hz, 2H), 7.76 (d, *J* = 6.0 Hz, 2H), 7.55 (t, *J* = 6.0 Hz, 1H), 7.50 (t, *J* = 6.0 Hz, 1H), 7.44 (dd, *J* = 6.0, 6.0 Hz, 4H), 6.12 (br s, 1H), 4.32 (t, *J* = 6.0 Hz, 2H), 3.31 (d, *J* = 6.0 Hz, 2H), 1.76–1.81 (m, 2H), 1.35–1.46 (m, 4H), 1.28–1.31 (m, 2H), 0.95 (s, 6H). <sup>13</sup>C NMR (150 MHz, CDCl<sub>3</sub>) δ 167.61, 166.54, 134.96, 132.69, 131.13, 130.32, 129.38, 128.40, 128.19, 126.75, 64.85, 49.40, 39.81, 34.49, 28.59, 26.75, 24.90, 23.50. HRMS–ESI (*m/z*): [M+Na]<sup>+</sup> calcd. for C<sub>23</sub>H<sub>29</sub>NNaO<sub>3</sub>, 390.2040; found, 390.2035. IR (KBr, cm<sup>-1</sup>): ν 3417, 1721, 1634, 1396, 1113, 710, 617.

### 8-benzamido-7,7-dimethyloctyl benzoate (2h)

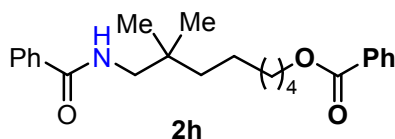

White solid. mp: 56.2–56.4 °C; <sup>1</sup>H NMR (400 MHz, CDCl<sub>3</sub>) δ 8.04 (d, *J* = 8.0 Hz, 2H), 7.75 (d, *J* = 8.0 Hz, 2H), 7.55 (t, *J* = 8.0 Hz, 1H), 7.50 (t, *J* = 8.0 Hz, 1H), 7.43 (dd, *J* = 8.0, 8.0 Hz, 4H), 6.08 (br s, 1H), 4.31 (t, *J* = 6.0 Hz, 2H), 3.30 (d, *J* = 8.0 Hz, 2H), 1.73–1.80 (m, 2H), 1.43–1.56 (m, 2H), 1.24–1.39 (m, 6H), 0.95(s, 6H). <sup>13</sup>C NMR (150 MHz, CDCl<sub>3</sub>) δ 167.62, 166.60, 135.02, 132.73, 131.21, 130.40, 129.44, 128.48, 128.24, 126.74, 64.96, 49.48, 39.95, 34.46, 30.05, 28.62, 25.95, 24.97, 23.75. HRMS–ESI (*m/z*): [M+Na]<sup>+</sup> calcd. for C<sub>24</sub>H<sub>31</sub>NNaO<sub>3</sub>, 404.2196; found, 404.2191. IR (KBr, cm<sup>-1</sup>): ν 3474, 3415, 1637, 1399, 1111, 616.

### 7-benzamido-6,6-dimethylheptyl 4-methylbenzenesulfonate (2i)

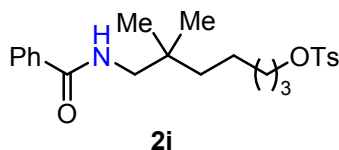

White solid. mp: 58.3–59.5 °C;  $^1\text{H NMR}$  (600 MHz,  $\text{CDCl}_3$ )  $\delta$  7.78 (d,  $J = 6.0$  Hz, 2H), 7.76 (d,  $J = 6.0$  Hz, 2H), 7.50 (t,  $J = 6.6$  Hz, 1H), 7.44 (dd,  $J = 6.0, 6.0$  Hz, 2H), 7.33 (d,  $J = 6.0$  Hz, 2H), 6.11 (br s, 1H), 4.02 (t,  $J = 6.0$  Hz, 2H), 3.27 (d,  $J = 6.0$  Hz, 2H), 2.44 (s, 3H), 1.63–1.68(m, 2H), 1.21–1.31 (m, 6H), 0.92 (s, 6H).  $^{13}\text{C NMR}$  (150 MHz,  $\text{CDCl}_3$ )  $\delta$  167.60, 144.61, 134.90, 133.03, 131.23, 129.75, 128.48, 127.74, 126.75, 70.50, 49.31, 39.65, 34.46, 28.65, 26.05, 24.91, 23.16, 21.53. **HRMS–ESI** ( $m/z$ ):  $[\text{M}+\text{Na}]^+$  calcd. for  $\text{C}_{23}\text{H}_{31}\text{NNaO}_4\text{S}$ , 440.1866; found, 440.1860. **IR** (KBr,  $\text{cm}^{-1}$ ):  $\nu$  3475, 3415, 1636, 1400, 1171, 618.

### 8-benzamido-7,7-dimethyloctyl 4-methylbenzenesulfonate (2j)

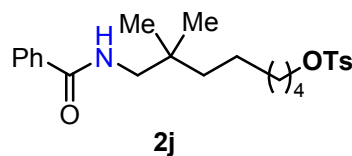

White solid. mp: 67.8–69.3 °C;  $^1\text{H NMR}$  (600 MHz,  $\text{CDCl}_3$ )  $\delta$  7.79 (d,  $J = 8.1$  Hz, 2H), 7.76 (d,  $J = 7.5$  Hz, 2H), 7.51 (t,  $J = 7.2$  Hz, 1H), 7.45 (t,  $J = 7.5$  Hz, 2H), 7.34 (d,  $J = 8.0$  Hz, 2H), 6.09 (br s, 1H), 4.01 (t,  $J = 6.3$  Hz, 2H), 3.28 (d,  $J = 6.3$  Hz, 2H), 2.45 (s, 3H), 1.64 (quint,  $J = 6.6$  Hz, 2H), 1.30–1.35 (m, 2H), 1.19–1.29 (m, 6H), 0.93 (s, 6H).  $^{13}\text{C NMR}$  (150 MHz,  $\text{CDCl}_3$ )  $\delta$  167.47, 144.46, 134.69, 132.67, 130.93, 129.57, 128.16, 127.49, 126.66, 70.44, 49.19, 39.57, 34.37, 29.42, 28.42, 24.98, 24.70, 23.36, 21.32. **HRMS–ESI** ( $m/z$ ):  $[\text{M}+\text{Na}]^+$  calcd. for  $\text{C}_{24}\text{H}_{33}\text{NNaO}_4\text{S}$ , 454.2023; found, 454.2020. **IR** (KBr,  $\text{cm}^{-1}$ ):  $\nu$  3475, 3415, 3255, 2923, 1639, 1560, 1467, 1357, 1176, 954, 813, 662.

### *N*-(2,2-diethyloctyl)benzamide (2k)

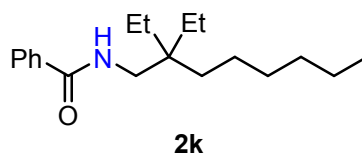

White solid. mp: 46.8–47.6 °C;  $^1\text{H NMR}$  (600 MHz,  $\text{CDCl}_3$ )  $\delta$  7.73 (d,  $J = 6.0$  Hz, 2H), 7.50 (t,  $J = 6.0$  Hz, 1H), 7.44 (dd,  $J = 6.0, 6.0$  Hz, 2H), 5.95 (br s, 1H), 3.32 (d,  $J = 6.0$  Hz, 2H), 1.22–1.32 (m, 14H), 0.88 (t,  $J = 6.0$  Hz, 3H), 0.85 (t,  $J = 6.0$  Hz, 6H).

$^{13}\text{C}$  NMR (150 MHz,  $\text{CDCl}_3$ )  $\delta$  167.40, 135.08, 131.07, 128.39, 126.67, 43.78, 38.63, 34.06, 31.70, 30.09, 26.78, 22.75, 22.55, 13.94, 7.42. **HRMS–ESI** ( $m/z$ ):  $[\text{M}+\text{Na}]^+$  calcd. for  $\text{C}_{19}\text{H}_{31}\text{NNaO}$ , 312.2298; found, 312.2308. **IR** (KBr,  $\text{cm}^{-1}$ ):  $\nu$  3550, 3475, 3414, 2926, 1636, 1301, 1174, 619.

***N*-(2-ethyl-2-methyloctyl)benzamide (2l)**

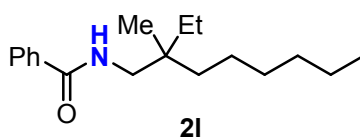

White solid. mp: 57.6–58.2 °C;  $^1\text{H}$  NMR (600 MHz,  $\text{CDCl}_3$ )  $\delta$  7.75 (d,  $J = 7.2$  Hz, 2H), 7.50 (t,  $J = 7.2$  Hz, 1H), 7.44 (dd,  $J = 7.2, 7.2$  Hz, 2H), 6.02 (br s, 1H), 3.32 (d,  $J = 6.0$  Hz, 2H), 1.22–1.38 (m, 12H), 0.90 (s, 3H), 0.89–0.85 (m, 6H).  $^{13}\text{C}$  NMR (150 MHz,  $\text{CDCl}_3$ )  $\delta$  167.60, 135.00, 131.14, 128.42, 126.72, 46.99, 37.02, 36.56, 31.74, 30.11, 29.65, 23.26, 22.57, 22.56, 13.99, 7.86. **HRMS–ESI** ( $m/z$ ):  $[\text{M}+\text{Na}]^+$  calcd. for  $\text{C}_{18}\text{H}_{29}\text{NNaO}$ , 298.2141; found, 298.2149. **IR** (KBr,  $\text{cm}^{-1}$ ):  $\nu$  3752, 3550, 3475, 2926, 1639, 1550, 1383, 704.

***N*-(2,2-dipropylpentyl)benzamide (2m)**

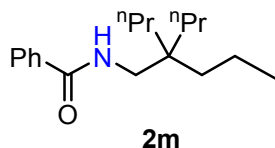

White solid. mp: 104.2–104.8 °C;  $^1\text{H}$  NMR (600 MHz,  $\text{CDCl}_3$ )  $\delta$  7.74 (d,  $J = 6.0$  Hz, 2H), 7.51 (t,  $J = 6.0$  Hz, 1H), 7.45 (dd,  $J = 6.0, 6.0$  Hz, 2H), 5.96 (br s, 1H), 3.32 (d,  $J = 6.0$  Hz, 2H), 1.26–1.30 (m, 6H), 1.21–1.23 (m, 6H), 0.90 (t,  $J = 6.0$  Hz, 9H).  $^{13}\text{C}$  NMR (100 MHz,  $\text{CDCl}_3$ )  $\delta$  167.51, 135.18, 131.19, 128.54, 126.71, 44.86, 38.91, 37.85, 16.29, 14.97. **HRMS–ESI** ( $m/z$ ):  $[\text{M}+\text{Na}]^+$  calcd. for  $\text{C}_{18}\text{H}_{29}\text{NNaO}$ , 298.2141; found, 298.2149. **IR** (KBr,  $\text{cm}^{-1}$ ):  $\nu$  3754, 3652, 3476, 2928, 1637, 1557, 1171, 698.

***N*-(2-isopropyl-2-methylpentyl)benzamide (2n)**

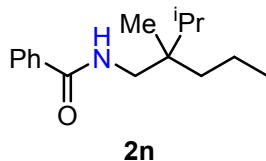

White solid. **mp**: 63.2–64.5 °C; **<sup>1</sup>H NMR** (600 MHz, CDCl<sub>3</sub>) δ 7.75 (d, *J* = 7.5 Hz, 2H), 7.51 (t, *J* = 7.2 Hz, 1H), 7.45 (dd, *J* = 7.5, 7.2 Hz, 2H), 6.01 (br s, 1H), 3.39 (dd, *J* = 13.8, 6.0 Hz, 2H), 1.67 (sept, *J* = 6.6 Hz, 1H), 1.24–1.32 (m, 4H), 0.92 (d, *J* = 6.6 Hz, 6H), 0.91 (s, 3H), 0.86 (s, 3H). **<sup>13</sup>C NMR** (150 MHz, CDCl<sub>3</sub>) δ 167.56, 135.14, 131.23, 128.55, 126.72, 45.29, 38.65, 38.37, 32.80, 19.47, 17.25, 17.17, 16.68, 15.09. **HRMS–ESI** (*m/z*): [M+Na]<sup>+</sup> calcd. for C<sub>16</sub>H<sub>25</sub>NNaO, 270.1828; found, 270.1828. **IR** (KBr, cm<sup>-1</sup>): ν 3551, 3476, 2960, 1634, 1317, 1183, 710, 619.

***N*-(1-butylcyclohexyl)methyl)benzamide (2o)**

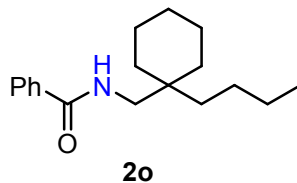

White solid. **mp**: 91.5–93.2 °C; **<sup>1</sup>H NMR** (600 MHz, CDCl<sub>3</sub>) δ 7.75 (d, *J* = 7.8 Hz, 2H), 7.50 (t, *J* = 7.2 Hz, 1H), 7.45 (dd, *J* = 7.8, 7.2 Hz, 2H), 6.01 (br s, 1H), 3.38 (d, *J* = 6.0 Hz, 2H), 1.50–1.57 (m, 2H), 1.40–1.48 (m, 4H), 1.26–1.39 (m, 10H), 0.92 (t, *J* = 6.9 Hz, 3H). **<sup>13</sup>C NMR** (150 MHz, CDCl<sub>3</sub>) δ 167.58, 135.17, 131.19, 128.52, 126.74, 45.80, 36.32, 35.55, 33.75, 26.22, 25.11, 23.57, 21.44, 14.06. **HRMS–ESI** (*m/z*): [M+Na]<sup>+</sup> calcd. for C<sub>18</sub>H<sub>27</sub>NNaO, 296.1985; found, 296.1984. **IR** (KBr, cm<sup>-1</sup>): ν 3751, 3474, 2930, 1642, 1546, 1303, 699, 613.

***N*-(1-octylcyclohexyl)methyl)benzamide (2p)**

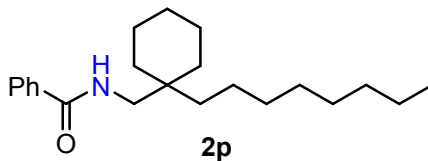

White solid. mp: 62.5–62.9 °C;  $^1\text{H NMR}$  (600 MHz,  $\text{CDCl}_3$ )  $\delta$  7.75 (d,  $J = 6.0$  Hz, 2H), 7.50 (t,  $J = 6.0$  Hz, 1H), 7.44 (t,  $J = 6.0, 6.0$  Hz, 2H), 6.01 (br s, 1H), 3.38 (d,  $J = 6.0$  Hz, 2H), 1.38–1.53 (m, 7H), 1.33–1.37 (m, 4H), 1.21–1.31 (m, 13H), 0.87 (t,  $J = 6.0$  Hz, 3H).  $^{13}\text{C NMR}$  (150MHz,  $\text{CDCl}_3$ )  $\delta$  167.53, 135.10, 131.12, 128.44, 126.73, 45.80, 36.33, 35.79, 33.68, 31.82, 30.52, 29.50, 29.25, 26.18, 22.82, 22.57, 21.41, 14.02. **HRMS–ESI** ( $m/z$ ):  $[\text{M}+\text{Na}]^+$  calcd. for  $\text{C}_{22}\text{H}_{35}\text{NNaO}$ , 352.2611; found, 352.2613. **IR** (KBr,  $\text{cm}^{-1}$ ):  $\nu$  3474, 3415, 2926, 1637, 1549, 1301, 700, 613.

***N*-(2-methylpentyl)benzamide (2q)**

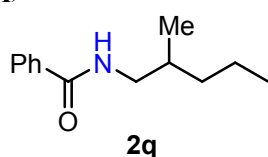

Colorless oil.  $^1\text{H NMR}$  (600 MHz,  $\text{CDCl}_3$ )  $\delta$  7.76 (d,  $J = 7.2$  Hz 2H), 7.50 (t,  $J = 7.5$  Hz, 1H), 7.44 (t,  $J = 7.2, 7.5$  Hz, 2H), 6.14 (br s, 1H), 3.41 (ddd,  $J = 13.2, 7.2, 6.0$  Hz, 1H), 3.27 (ddd,  $J = 13.2, 7.2, 6.0$  Hz, 1H), 1.73–1.81 (m, 1H), 1.38–1.46 (m, 2H), 1.29–1.37 (m, 1H), 1.15–1.22 (m, 1H), 0.97 (d,  $J = 6.6$  Hz, 3H), 0.91 (t,  $J = 7.2$  Hz, 3H).  $^{13}\text{C NMR}$  (150 MHz,  $\text{CDCl}_3$ )  $\delta$  167.62, 134.72, 131.00, 128.22, 126.81, 45.90, 36.56, 32.97, 19.85, 17.44, 14.13. **HRMS–ESI** ( $m/z$ ):  $[\text{M}+\text{Na}]^+$  calcd. for  $\text{C}_{13}\text{H}_{19}\text{NNaO}$ , 228.1359; found, 228.1351. **IR** (KBr,  $\text{cm}^{-1}$ ):  $\nu$  3317, 2961, 1643, 1543, 1300, 702.

***N*-(2-propylpentyl)benzamide (2r)**

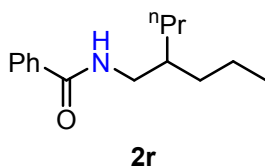

White solid. mp: 63.7–64.2 °C;  $^1\text{H NMR}$  (600 MHz,  $\text{CDCl}_3$ )  $\delta$  7.75 (d,  $J = 6.0$  Hz, 2H), 7.50 (t,  $J = 6.0$  Hz, 1H), 7.44 (dd,  $J = 6.0, 6.0$  Hz, 2H), 6.05 (br s, 1H), 3.41 (t,  $J = 6.0$  Hz, 2H), 1.65 (sept,  $J = 6.0$  Hz, 1H), 1.34–1.41 (m, 4H), 1.30–1.33 (m, 4H), 0.92 (t,  $J = 6.0$  Hz, 6H).  $^{13}\text{C NMR}$  (150 MHz,  $\text{CDCl}_3$ )  $\delta$  167.57, 134.89, 131.16,

128.43, 126.77, 43.24, 37.54, 34.16, 19.74, 14.37. **HRMS–ESI** ( $m/z$ ):  $[M+Na]^+$  calcd. for  $C_{15}H_{23}NNaO$ , 256.1672; found, 256.1676. **IR** (KBr,  $cm^{-1}$ ):  $\nu$  3752, 3551, 3476, 2956, 2925, 1631, 1540, 1301, 695.

***N*-(2-isopropylpentyl)benzamide (2s)**

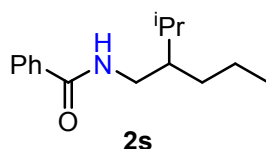

White solid. mp: 69.6–71.3 °C;  **$^1H$  NMR** (600 MHz,  $CDCl_3$ )  $\delta$  7.75 (d,  $J = 6.0$  Hz, 2H), 7.50 (t,  $J = 6.0$  Hz, 1H), 7.44 (dd,  $J = 6.0, 6.0$  Hz, 2H), 6.03 (s, 1H), 3.38–3.47 (m, 2H), 1.75–1.81 (m, 1H), 1.44–1.50 (m, 1H), 1.32–1.44 (m, 3H), 1.18–1.25 (m, 1H), 0.95 (d,  $J = 6.0$ , 3H), 0.94 (d,  $J = 6.0$ , 3H), 0.92 (t,  $J = 6.0$ , 3H).  **$^{13}C$  NMR** (150 MHz,  $CDCl_3$ )  $\delta$  167.49, 134.96, 131.20, 128.49, 126.76, 43.90, 41.14, 31.16, 28.61, 20.82, 19.42, 19.06, 14.42. **HRMS–ESI** ( $m/z$ ):  $[M+Na]^+$  calcd. for  $C_{15}H_{23}NNaO$ , 256.1672; found, 256.1675. **IR** (KBr,  $cm^{-1}$ ):  $\nu$  3474, 3415, 1633, 1549, 1315, 1122, 705, 617.

***N*-octylbenzamide (2t)**

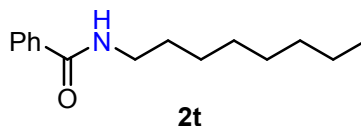

White solid. mp: 41.6–42.0 °C;  **$^1H$  NMR** (600 MHz,  $CDCl_3$ )  $\delta$  7.76 (d,  $J = 7.2$  Hz, 2H), 7.49 (t,  $J = 7.5$  Hz, 1H), 7.43 (dd,  $J = 7.5, 7.5$  Hz, 2H), 6.13 (br s, 1H), 3.43–3.47 (m, 2H), 1.58–1.66 (m, 2H), 1.27–1.40 (m, 10H), 0.88 (t,  $J = 6.9$  Hz, 3H).  **$^{13}C$  NMR** (150 MHz,  $CDCl_3$ )  $\delta$  167.49, 134.73, 131.00, 128.23, 126.83, 40.01, 31.65, 29.52, 29.17, 29.07, 26.90, 22.48, 13.93. **HRMS–ESI** ( $m/z$ ):  $[M+Na]^+$  calcd. for  $C_{15}H_{23}NNaO$ , 256.1672; found, 256.1672. **IR** (KBr,  $cm^{-1}$ ):  $\nu$  3474, 3415, 2921, 1631, 1532, 1121, 615.

***N*-(2,2,4-trimethylpentyl)benzamide (2u)**

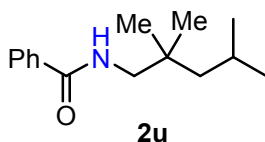

White solid. mp: 58.0–58.5 °C;  $^1\text{H NMR}$  (600 MHz,  $\text{CDCl}_3$ )  $\delta$  7.76 (d,  $J = 7.5$  Hz, 2H), 7.51 (t,  $J = 7.2$  Hz, 1H), 7.45 (dd,  $J = 7.5, 7.2$  Hz, 2H), 6.11 (br s, 1H), 3.31 (d,  $J = 6.3$  Hz, 2H), 1.75 (sept,  $J = 6.0$  Hz, 1H), 1.23 (d,  $J = 5.4$  Hz, 2H), 0.98 (s, 6H), 0.95 (d,  $J = 6.6$  Hz, 6H).  $^{13}\text{C NMR}$  (150 MHz,  $\text{CDCl}_3$ )  $\delta$  167.59, 135.01, 131.24, 128.52, 126.75, 50.04, 48.85, 35.17, 25.44, 23.98. **HRMS–ESI** ( $m/z$ ):  $[\text{M}+\text{Na}]^+$  calcd. for  $\text{C}_{15}\text{H}_{23}\text{NNaO}$ , 256.1672; found, 256.1665. **IR** (KBr,  $\text{cm}^{-1}$ ):  $\nu$  3474, 3415, 2958, 1638, 1398, 1178, 614.

***N*-(2-heptyl)benzamide (2v)**

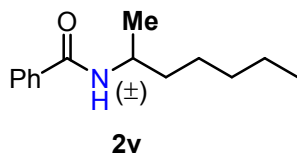

White solid. mp: 64.7–65.3 °C;  $^1\text{H NMR}$  (400 MHz,  $\text{CDCl}_3$ )  $\delta$  7.75 (d,  $J = 8.0$  Hz, 2H), 7.49 (t,  $J = 8.0$  Hz, 1H), 7.42 (dd,  $J = 8.0, 8.0$  Hz, 2H), 5.86 (d,  $J = 8.0$  Hz, 1H), 4.14–4.24 (m, 1H), 1.50–1.57 (m, 2H), 1.27–1.40 (m, 6H), 1.23 (d,  $J = 8.0$  Hz, 3H), 0.88 (t,  $J = 6.0$  Hz, 3H).  $^{13}\text{C NMR}$  (150 MHz,  $\text{CDCl}_3$ )  $\delta$  166.77, 135.07, 131.15, 128.44, 126.77, 45.73, 36.98, 31.67, 25.73, 22.52, 20.98, 13.96. **HRMS–ESI** ( $m/z$ ):  $[\text{M}+\text{Na}]^+$  calcd. for  $\text{C}_{14}\text{H}_{21}\text{NNaO}$ , 242.1515; found, 242.1518. **IR** (KBr,  $\text{cm}^{-1}$ ):  $\nu$  3415, 2923, 1633, 1457, 1162, 889, 698.

***N*-(1-octylcyclopentyl)benzamide (2w)**

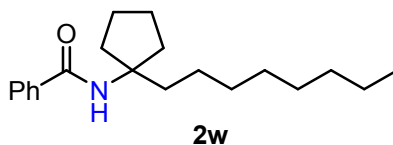

White solid. mp: 89.1–89.7 °C;  $^1\text{H NMR}$  (400 MHz,  $\text{CDCl}_3$ )  $\delta$  7.71 (d,  $J = 8.0$  Hz, 2H), 7.48 (t,  $J = 8.0$  Hz, 1H), 7.42 (dd,  $J = 8.0, 8.0$  Hz, 2H), 5.84 (br s, 1H), 2.05–2.11 (m, 2H), 1.90–1.94 (m, 2H), 1.68–1.77 (m, 6H), 1.24–1.29 (m, 12H), 0.86 (t,  $J = 6.0$  Hz, 3H).  $^{13}\text{C NMR}$  (150 MHz,  $\text{CDCl}_3$ )  $\delta$  166.89, 135.92, 131.02, 128.46, 126.65,



65.19, 38.12, 37.35, 31.82, 29.97, 29.60, 29.26, 25.10, 23.75, 22.62, 14.06. **HRMS–ESI** ( $m/z$ ):  $[M+Na]^+$  calcd. for  $C_{20}H_{31}NNaO$ , 324.2298; found, 324.2288. **IR** (KBr,  $cm^{-1}$ ):  $\nu$  3416, 2924, 1636, 1400, 1119, 617.

**(±)2-benzamidohexyl pivalate (2x)**

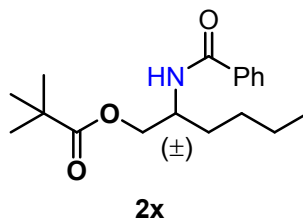

White solid. mp: 71.8–73.3 °C;  $^1H$  NMR (600 MHz,  $CDCl_3$ )  $\delta$  7.75 (d,  $J = 7.2$  Hz, 2H), 7.50 (t,  $J = 7.5$  Hz, 1H), 7.44 (dd,  $J = 7.2, 7.5$  Hz, 2H), 6.21 (d,  $J = 7.5$  Hz, 1H), 4.40–4.46 (m, 1H), 4.32 (dd,  $J = 11.4, 6.3$  Hz, 1H), 4.12 (dd,  $J = 11.4, 4.2$  Hz, 1H), 1.53–1.64 (m, 2H), 1.33–1.42 (m, 4H), 1.19 (s, 9H), 0.90 (t,  $J = 6.9$  Hz, 3H).  $^{13}C$  NMR (150 MHz,  $CDCl_3$ )  $\delta$  178.72, 167.01, 134.40, 131.30, 128.41, 126.77, 65.58, 49.01, 38.77, 31.25, 27.82, 27.03, 22.41, 13.81. **HRMS–ESI** ( $m/z$ ):  $[M+Na]^+$  calcd. for  $C_{18}H_{27}NNaO_3$ , 328.1883; found, 328.1887. **IR** (KBr,  $cm^{-1}$ ):  $\nu$  3417, 2925, 1637, 1400, 1173, 614.

**(±) 2-benzamidohexyl acetate (2y)**

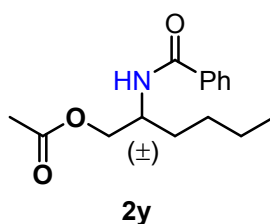

White solid. mp: 63.7–64.3 °C;  $^1H$  NMR (400 MHz,  $CDCl_3$ )  $\delta$  7.76 (d,  $J = 8.0$  Hz, 2H), 7.51 (t,  $J = 8.0$  Hz, 1H), 7.44 (dd,  $J = 8.0, 8.0$  Hz, 2H), 6.20 (d,  $J = 8.0$  Hz, 1H), 4.36–4.44 (m, 1H), 4.30 (dd,  $J = 12.0, 4.0$  Hz, 1H), 4.14 (dd,  $J = 12.0, 4.0$  Hz, 1H), 2.08 (s, 3H), 1.52–1.66 (m, 2H), 1.32–1.43 (m, 4H), 0.91 (t,  $J = 8.0$  Hz, 3H).  $^{13}C$  NMR (100 MHz,  $CDCl_3$ )  $\delta$  171.25, 167.14, 134.47, 131.37, 128.45, 126.85, 65.93, 48.95, 31.27, 27.94, 22.44, 20.75, 13.84. **HRMS–ESI** ( $m/z$ ):  $[M+Na]^+$  calcd. for

C<sub>15</sub>H<sub>21</sub>NNaO<sub>3</sub>, 286.1414; found, 286.1418. **IR** (KBr, cm<sup>-1</sup>): ν 3415, 2926, 1732, 1637, 1399, 1121, 695, 616.

**(±)2-benzamidohexyl benzoate (2z)**

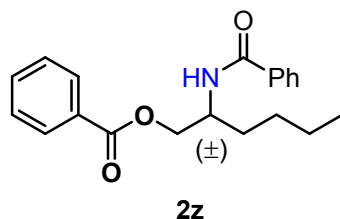

White solid. mp: 117.0–118.0 °C; <sup>1</sup>H NMR (600 MHz, CDCl<sub>3</sub>) δ 8.02 (d, *J* = 7.8 Hz, 2H), 7.76 (d, *J* = 7.8 Hz, 2H), 7.56 (t, *J* = 7.2 Hz, 1H), 7.49 (t, *J* = 7.5 Hz, 1H), 7.44 (dd, *J* = 7.8, 7.2 Hz, 2H), 7.42 (dd, *J* = 7.8, 7.5 Hz, 2H), 6.32 (d, *J* = 7.2 Hz, 1H), 4.53–4.57 (m, 1H), 4.52 (dd, *J* = 11.1, 6.0 Hz, 1H), 4.43 (dd, *J* = 11.1, 3.3 Hz, 1H), 1.71–1.76 (m, 1H), 1.64–1.69 (m, 1H), 1.42–1.50 (m, 2H), 1.33–1.41 (m, 2H), 0.92 (t, *J* = 7.2 Hz, 3H). <sup>13</sup>C NMR (150 MHz, CDCl<sub>3</sub>) δ 167.23, 166.90, 134.59, 133.20, 131.47, 129.81, 129.66, 128.59, 128.47, 126.87, 66.51, 49.28, 31.55, 28.07, 22.56, 13.93. **HRMS–ESI** (*m/z*): [M+Na]<sup>+</sup> calcd. for C<sub>20</sub>H<sub>23</sub>NNaO<sub>3</sub>, 348.1570; found, 348.1576. **IR** (KBr, cm<sup>-1</sup>): ν 3416, 2956, 1719, 1635, 1399, 1127, 706, 615.

**(±)2-benzamidohexyl 2,3,4,5,6-pentafluorobenzoate (2aa)**

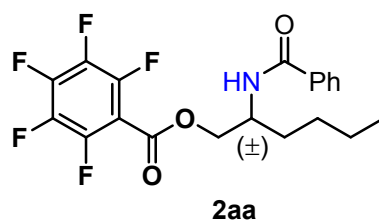

White solid. mp: 96.0–97.6 °C; <sup>1</sup>H NMR (600 MHz, CDCl<sub>3</sub>) δ 7.76 (d, *J* = 7.2 Hz, 2H), 7.52 (t, *J* = 7.5 Hz, 1H), 7.45 (dd, *J* = 7.2, 7.5 Hz, 2H), 6.15 (d, *J* = 7.8 Hz, 1H), 4.57 (dd, *J* = 10.5, 4.2 Hz, 1H), 4.49–4.54 (m, 2H), 1.62–1.73 (m, 2H), 1.34–1.45 (m, 4H), 0.92 (t, *J* = 7.2 Hz, 3H). <sup>13</sup>C NMR (150 MHz, CDCl<sub>3</sub>) δ 167.20, 158.90, 134.12, 131.42, 128.37, 126.79, 67.89, 48.42, 31.04, 27.94, 22.35, 13.74. **HRMS–ESI** (*m/z*): [M+Na]<sup>+</sup> calcd. for C<sub>20</sub>H<sub>18</sub>F<sub>5</sub>NNaO<sub>3</sub>, 438.1099; found, 438.1089. **IR** (KBr, cm<sup>-1</sup>): ν

3475, 3415, 1734, 1639, 1531, 1396, 1106, 696.

**(±)-methyl 2-benzamidohexanoate (2ab)**

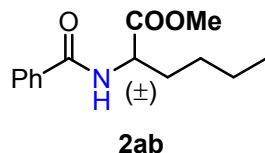

White solid. mp: 69.5–71.3 °C;  $^1\text{H NMR}$  (600 MHz,  $\text{CDCl}_3$ )  $\delta$  7.81 (d,  $J = 7.5$  Hz, 2H), 7.53 (t,  $J = 7.5$  Hz, 1H), 7.46 (dd,  $J = 7.5, 7.5$  Hz, 2H), 6.65 (d,  $J = 7.2$  Hz, 1H), 4.84 (dd,  $J = 13.2, 7.2$  Hz, 1H), 3.79 (s, 3H), 1.95–1.99 (m, 1H), 1.76–1.82 (m, 1H), 1.30–1.41 (m, 4H), 0.90 (t,  $J = 6.9$  Hz, 3H).  $^{13}\text{C NMR}$  (150 MHz,  $\text{CDCl}_3$ )  $\delta$  173.06, 166.95, 133.65, 131.37, 128.20, 126.91, 52.39, 52.06, 31.79, 27.29, 22.05, 13.61. **HRMS–ESI** ( $m/z$ ):  $[\text{M}+\text{Na}]^+$  calcd. for  $\text{C}_{14}\text{H}_{19}\text{NNaO}_3$ , 272.1257; found, 272.1252. **IR** (KBr,  $\text{cm}^{-1}$ ):  $\nu$  3415, 2954, 1752, 1634, 1363, 1157, 720, 633.

**(±)-ethyl 2-benzamidohexanoate (2ac)**

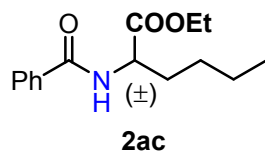

White solid. mp: 79.4–81.1 °C;  $^1\text{H NMR}$  (600 MHz,  $\text{CDCl}_3$ )  $\delta$  7.82 (d,  $J = 7.8$  Hz, 2H), 7.52 (t,  $J = 7.5$  Hz, 1H), 7.45 (dd,  $J = 7.8, 7.5$  Hz, 2H), 6.68 (d,  $J = 7.2$  Hz, 1H), 4.82 (dt,  $J = 13.2, 7.2$  Hz, 1H), 4.25 (dq,  $J = 7.2, 1.8$  Hz, 2H), 1.95–2.00 (m, 1H), 1.76–1.82 (m, 1H), 1.30–1.44 (m, 4H), 1.31 (t,  $J = 7.2$  Hz, 3H), 0.90 (t,  $J = 7.0$  Hz, 3H).  $^{13}\text{C NMR}$  (150 MHz,  $\text{CDCl}_3$ )  $\delta$  172.68, 166.92, 133.95, 131.47, 128.37, 126.95, 61.27, 52.51, 32.15, 27.25, 22.19, 14.04, 13.71. **HRMS–ESI** ( $m/z$ ):  $[\text{M}+\text{Na}]^+$  calcd. for  $\text{C}_{15}\text{H}_{21}\text{NNaO}_3$ , 286.1414; found, 286.1410. **IR** (KBr,  $\text{cm}^{-1}$ ):  $\nu$  3415, 2924, 1745, 1637, 1399, 1161, 715, 618.

**(±)-methyl 2-benzamidodecanoate (2ad)**

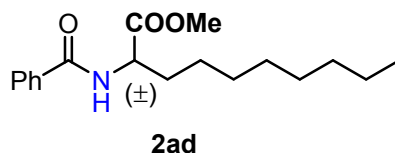

White solid. mp: 49.7–50.8 °C;  $^1\text{H NMR}$  (600 MHz,  $\text{CDCl}_3$ )  $\delta$  7.81 (d,  $J = 6.0$  Hz, 2H), 7.50 (t,  $J = 6.0$  Hz, 1H), 7.42 (t,  $J = 6.0$  Hz, 2H), 6.77 (br s, 1H), 4.82 (dt,  $J = 9.0$ , 6.0 Hz, 1H), 3.77 (s, 3H), 1.92–1.97 (m, 1H), 1.75–1.80 (m, 1H), 1.20–1.41 (m, 12H), 0.87 (t,  $J = 6.0$  Hz, 3H).  $^{13}\text{C NMR}$  (150 MHz,  $\text{CDCl}_3$ )  $\delta$  173.22, 166.95, 133.97, 131.60, 128.48, 127.01, 52.54, 52.29, 32.52, 31.71, 29.25, 29.15, 29.08, 25.21, 22.54, 13.99. **HRMS–ESI** ( $m/z$ ):  $[\text{M}+\text{Na}]^+$  calcd. for  $\text{C}_{18}\text{H}_{27}\text{NNaO}_3$ , 328.1883; found, 328.1889. **IR** (KBr,  $\text{cm}^{-1}$ ):  $\nu$  3289, 2923, 1745, 1642, 1213, 703.

**(±)-methyl 2-benzamido-5-cyclohexylpentanoate (2ae)**

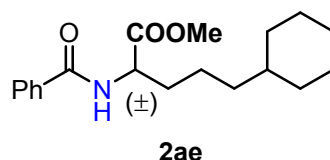

White solid. mp: 61.4–63.2 °C;  $^1\text{H NMR}$  (600 MHz,  $\text{CDCl}_3$ )  $\delta$  7.81 (d,  $J = 7.2$  Hz, 2H), 7.52 (t,  $J = 7.5$  Hz, 1H), 7.45 (t,  $J = 7.2$ , 7.5 Hz, 2H), 6.65 (d,  $J = 7.5$  Hz, 1H), 4.83 (td,  $J = 7.5$ , 5.7 Hz, 1H), 3.78 (s, 3H), 1.90–1.96 (m, 1H), 1.73–1.79 (m, 1H), 1.61–1.68 (m, 5H), 1.38–1.45 (m, 1H), 1.30–1.37 (m, 1H), 1.09–1.24 (m, 6H), 0.80–0.90 (m, 2H).  $^{13}\text{C NMR}$  (150 MHz,  $\text{CDCl}_3$ )  $\delta$  173.30, 166.99, 134.04, 131.71, 128.60, 127.04, 52.59, 52.41, 37.40, 36.98, 33.31, 33.24, 32.97, 26.62, 26.32, 22.52. **HRMS–ESI** ( $m/z$ ):  $[\text{M}+\text{Na}]^+$  calcd. for  $\text{C}_{19}\text{H}_{27}\text{NNaO}_3$ , 340.1883; found, 340.1881. **IR** (KBr,  $\text{cm}^{-1}$ ):  $\nu$  3416, 2922, 1749, 1637, 1400, 1169, 614.

**7-benzamido-8-methoxy-8-oxooctyl benzoate (2af)**

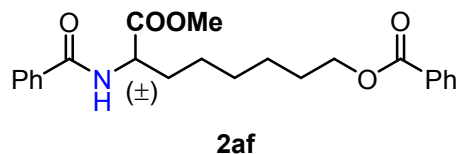

White solid. mp: 61.9–62.8 °C;  $^1\text{H NMR}$  (600 MHz,  $\text{CDCl}_3$ )  $\delta$  8.03 (d,  $J = 7.8$  Hz,

2H), 7.81 (d,  $J = 7.5$  Hz, 2H), 7.55 (t,  $J = 7.5$  Hz, 1H), 7.52 (dd,  $J = 7.5, 7.5$  Hz, 1H), 7.42–7.46 (m, 4H), 6.67 (t,  $J = 6.9$  Hz, 1H), 4.85 (dd,  $J = 13.2, 6.5$  Hz, 1H), 4.30 (t,  $J = 6.6$  Hz, 2H), 3.79 (s, 3H), 1.95–2.02 (m, 1H), 1.71–1.84 (m, 3H), 1.33–1.44 (m, 6H).  $^{13}\text{C}$  NMR (150 MHz,  $\text{CDCl}_3$ )  $\delta$  173.05, 166.96, 166.49, 133.77, 132.69, 131.56, 130.25, 129.35, 128.39, 128.18, 126.95, 64.75, 52.39, 52.28, 32.30, 28.70, 28.43, 25.67, 25.08. HRMS–ESI ( $m/z$ ):  $[\text{M}+\text{Na}]^+$  calcd. for  $\text{C}_{23}\text{H}_{27}\text{NNaO}_5$ , 420.1781; found, 420.1780. IR (KBr,  $\text{cm}^{-1}$ ):  $\nu$  3416, 2924, 1636, 1400, 1118, 617.

**17-(7-benzamido-6,6-dimethyl-2-heptanyl)-10,13-dimethylhexadecahydro-1H-cyclopenta[a]phenanthren-3-yl benzoate (2ag)**

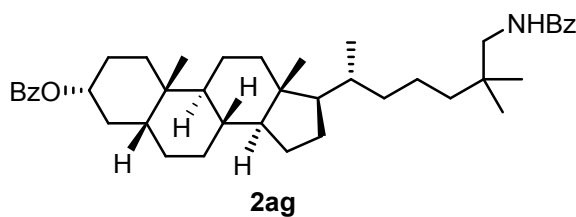

Yellow oil.  $^1\text{H}$  NMR (600 MHz,  $\text{CDCl}_3$ )  $\delta$  8.05 (d,  $J = 6.6$  Hz, 2H), 7.76 (d,  $J = 7.2$  Hz, 2H), 7.55 (t,  $J = 7.5$  Hz, 1H), 7.51 (t,  $J = 7.5$  Hz, 1H), 7.44 (d,  $J = 7.8$  Hz, 2H), 7.43 (d,  $J = 7.8$  Hz, 2H), 6.10 (t,  $J = 5.7$  Hz, 1H), 4.95–5.00 (m, 1H), 3.30 (d,  $J = 6.3$  Hz, 2H), 1.98 (t,  $J = 11.1$  Hz, 2H), 1.86–1.88 (m, 2H), 1.77–1.83 (m, 2H), 1.67–1.69 (m, 1H), 1.51–1.57 (m, 3H), 1.32–1.48 (m, 8H), 1.16–1.29 (m, 8H), 1.08–1.13 (m, 4H), 0.96 (s, 3H), 0.95 (s, 6H), 0.92 (d,  $J = 6.5$  Hz, 3H), 0.65 (s, 3H).  $^{13}\text{C}$  NMR (150 MHz,  $\text{CDCl}_3$ )  $\delta$  167.62, 166.13, 135.11, 132.66, 131.31, 130.90, 129.50, 128.59, 128.23, 126.77, 74.99, 56.49, 56.26, 49.63, 42.69, 41.94, 40.65, 40.47, 40.15, 36.75, 35.79, 35.73, 35.06, 34.62, 34.51, 32.33, 28.33, 27.04, 26.74, 26.34, 25.11, 25.05, 24.19, 23.36, 20.87, 20.26, 18.68, 12.04. HRMS–ESI ( $m/z$ ):  $[\text{M}+\text{Na}]^+$  calcd. for  $\text{C}_{42}\text{H}_{59}\text{N}_2\text{NaO}_3$ , 648.4387; found, 648.4377. IR (KBr,  $\text{cm}^{-1}$ ):  $\nu$  3750, 3474, 2924, 1637, 1460, 1399, 615.

**Procedures for Site-Selective Oxidation Trifluoroacetoxylation of Aliphatic Amines**

**Procedure A:** To an oven-dried 25 mL Schlenk tube, **2a** (23.3 mg, 0.10 mmol, 1.0 equiv), TBAB (16.2 mg, 0.05 mmol, 50 mol%), Br<sub>2</sub> (6.0 μL, 0.12 mmol, 1.2 equiv), 1.0 mL DCM were added sequentially. The reaction mixture was stirred at room temperature for 15 min. After that, CuI (3.8 mg, 0.02 mmol, 20 mol%), PhI(OTFA)<sub>2</sub> (95.0 mg, 0.22 mmol, 2.2 equiv) were added, the tube was sealed and placed in a 100 °C parallel synthesizer and stirred for 5 h. After completion, the reaction mixture was cooled down to room temperature and the solvent was removed under reduced pressure. Flash Silica gel column purification (EtOAc/petroleum ether/DCM = 1:25:0.5 as eluent) of the crude product provided **3a** (21.4 mg, 0.08mmol) in 72% isolated yield.

**Procedure B:** Changed: AgOAc (3.3 mg, 0.02 mmol, 20mol%). Other process is the same as the **Procedure A**.

### Characterization Data for Product

#### 6-benzamido-5,5-dimethylhexan-3-yl 2,2,2-trifluoroacetate (**3a**)

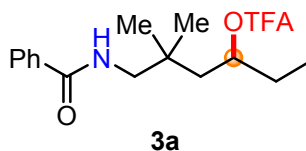

Colourless oil. <sup>1</sup>H NMR (600 MHz, CDCl<sub>3</sub>) δ 7.77 (d, *J* = 6.0 Hz, 2H), 7.52 (t, *J* = 9.0 Hz, 1H), 7.46 (dd, *J* = 6.0, 9.0 Hz, 2H), 6.29 (br s, 1H), 5.19–5.23 (m, 1H), 3.53 (dd, *J* = 12.0, 6.0 Hz, 1H), 3.10 (dd, *J* = 12.0, 6.0 Hz, 1H), 1.81 (dd, *J* = 12.0, 9.0 Hz, 1H), 1.71 (td, *J* = 9.0, 6.0 Hz, 2H), 1.56 (dd, *J* = 12.0, 1.8 Hz, 1H), 0.98 (s, 6H), 0.92 (t, *J* = 9.0 Hz, 3H). <sup>13</sup>C NMR (150 MHz, CDCl<sub>3</sub>) δ 167.68, 157.24 (q, *J* = 42.0 Hz) 134.64, 131.52, 128.65, 126.77, 114.55 (q, *J* = 285.0 Hz), 78.35, 49.33, 42.31, 34.54, 28.66, 25.34, 25.19, 9.06. HRMS–ESI (*m/z*): [M+Na]<sup>+</sup> calcd. for C<sub>17</sub>H<sub>22</sub>F<sub>3</sub>NNaO<sub>3</sub>, 368.1444; found, 368.1442. IR (KBr, cm<sup>-1</sup>): ν 3415, 1679, 1544, 1205, 800, 716.

#### 5,5-dimethyl-6-(4-methylbenzamido)hexan-3-yl 2,2,2-trifluoroacetate (**3-PG 2**)

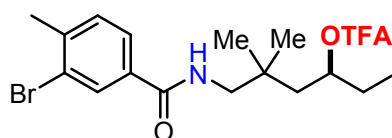

**3-PG 2**

Colourless oil.  $^1\text{H NMR}$  (600 MHz,  $\text{CDCl}_3$ )  $\delta$  7.94 (s, 1H), 7.59 (d,  $J = 7.8$  Hz, 1H), 7.30 (d,  $J = 7.8$  Hz, 1H), 6.22 (s, 1H), 5.18–5.21 (m, 1H), 3.52 (dd,  $J = 13.8, 7.8$  Hz, 1H), 3.08 (dd,  $J = 13.8, 5.4$  Hz, 1H), 2.45 (s, 3H), 1.79 (dd,  $J = 15.3, 8.4$  Hz, 1H), 1.66–1.75 (m, 2H), 1.55 (dd,  $J = 15.3, 1.8$  Hz, 1H), 0.98 (s, 6H), 0.93 (t,  $J = 7.5$  Hz, 3H).  $^{13}\text{C NMR}$  (100 MHz,  $\text{CDCl}_3$ )  $\delta$  166.14, 157.27 (q,  $J = 42.0$  Hz), 141.74, 133.81, 130.89, 130.87, 125.52, 125.15, 114.54 (q,  $J = 285.0$  Hz), 78.37, 49.32, 42.31, 34.57, 28.65, 25.42, 25.22, 22.99, 9.09. **HRMS–ESI** ( $m/z$ ):  $[\text{M}+\text{Na}]^+$  calcd. for  $\text{C}_{18}\text{H}_{23}\text{BrF}_3\text{NNaO}_3$ , 460.0706; found, 460.0700. **IR** (KBr,  $\text{cm}^{-1}$ ):  $\nu$  3415, 1637, 1400, 1172, 617.

**6-(4-chlorobenzamido)-5,5-dimethylhexan-3-yl 2,2,2-trifluoroacetate (3-PG 3)**

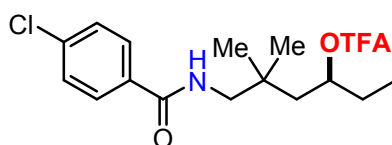

**3-PG 3**

Colourless oil.  $^1\text{H NMR}$  (600 MHz,  $\text{CDCl}_3$ )  $\delta$  7.71 (d,  $J = 8.4$  Hz, 2H), 7.42 (d,  $J = 8.4$  Hz, 2H), 6.27 (br s, 1H), 5.16–5.23 (m, 1H), 3.52 (dd,  $J = 13.8, 7.8$  Hz, 1H), 3.09 (dd,  $J = 13.8, 5.4$  Hz, 1H), 1.80 (dd,  $J = 15.4, 8.4$  Hz, 1H), 1.67–1.75 (m, 2H), 1.55 (d,  $J = 15.4$  Hz, 1H), 0.98 (s, 6H), 0.93 (t,  $J = 7.5$  Hz, 3H).  $^{13}\text{C NMR}$  (150 MHz,  $\text{CDCl}_3$ )  $\delta$  166.62, 157.27 (q, 42.0 Hz), 137.78, 132.96, 128.90, 128.22, 114.55, 78.38, 49.32, 42.37, 34.54, 28.65, 25.48, 25.21, 9.07. **HRMS–ESI** ( $m/z$ ):  $[\text{M}+\text{Na}]^+$  calcd. for  $\text{C}_{17}\text{H}_{21}\text{F}_3\text{NClNaO}_3$ , 402.1054; found, 402.1041. **IR** (KBr,  $\text{cm}^{-1}$ ):  $\nu$  3415, 1637, 1400, 1120, 617.

**5,5-dimethyl-6-(4-nitrobenzamido)hexan-3-yl 2,2,2-trifluoroacetate (3-PG 5)**

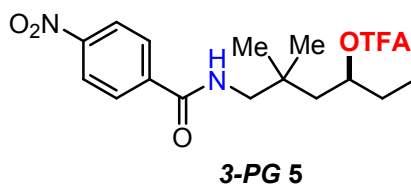

Colourless oil.  $^1\text{H NMR}$  (600 MHz,  $\text{CDCl}_3$ )  $\delta$  8.30 (d,  $J = 8.4$  Hz, 2H), 7.93 (d,  $J = 8.4$  Hz, 2H), 6.46 (br s, 1H), 5.15–5.23 (m, 1H), 3.57 (dd,  $J = 13.8, 7.8$  Hz, 1H), 3.13 (dd,  $J = 13.8, 5.4$  Hz, 1H), 1.82 (dd,  $J = 15.3, 8.1$  Hz, 1H), 1.69–1.78 (m, 2H), 1.58 (dd,  $J = 15.4, 2.1$  Hz, 1H), 1.00 (s, 6H), 0.94 (t,  $J = 7.5$  Hz, 3H).  $^{13}\text{C NMR}$  (150 MHz,  $\text{CDCl}_3$ )  $\delta$  165.73, 157.31 (q,  $J = 42.0$  Hz), 149.60, 140.16, 128.01, 123.87, 114.53 (q,  $J = 285.0$  Hz), 78.41, 49.44, 42.43, 34.57, 28.64, 25.64, 25.20, 9.07. **HRMS–ESI** ( $m/z$ ):  $[\text{M}+\text{Na}]^+$  calcd. for  $\text{C}_{17}\text{H}_{21}\text{F}_3\text{N}_2\text{NaO}_5$ , 413.1295; found, 413.1282. **IR** (KBr,  $\text{cm}^{-1}$ ):  $\nu$  3416, 1638, 1400, 1172, 615, 481.

**5,5-dimethyl-6-(2-nitrobenzamido)hexan-3-yl 2,2,2-trifluoroacetate (3-PG 6)**

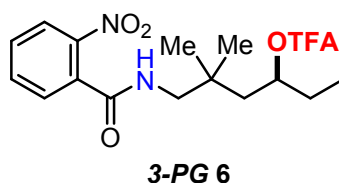

Colourless oil.  $^1\text{H NMR}$  (600 MHz,  $\text{CDCl}_3$ )  $\delta$  8.05 (d,  $J = 8.1$  Hz, 1H), 7.68 (t,  $J = 7.5$  Hz, 1H), 7.59 (t,  $J = 7.8$  Hz, 1H), 7.50 (d,  $J = 7.5$  Hz, 1H), 6.03 (br s, 1H), 5.21–5.24 (m, 1H), 3.49–3.52 (m, 1H), 3.09 (dd,  $J = 13.8, 5.7$  Hz, 1H), 1.83 (dd,  $J = 15.6, 8.7$  Hz, 1H), 1.69–1.77 (m, 2H), 1.66 (d,  $J = 15.3$  Hz, 1H), 1.01 (s, 3H), 0.98 (s, 3H), 0.93 (t,  $J = 7.4$  Hz, 3H).  $^{13}\text{C NMR}$  (150 MHz,  $\text{CDCl}_3$ )  $\delta$  166.63, 157.23 (q,  $J = 42.0$  Hz), 146.61, 133.62, 133.03, 130.53, 128.64, 124.56, 114.58 (q,  $J = 285.0$  Hz), 78.49, 49.89, 42.16, 34.53, 28.65, 25.26, 25.21, 8.98. **HRMS–ESI** ( $m/z$ ):  $[\text{M}+\text{Na}]^+$  calcd. for  $\text{C}_{17}\text{H}_{21}\text{F}_3\text{N}_2\text{NaO}_5$ , 413.1295; found, 413.129. **IR** (KBr,  $\text{cm}^{-1}$ ):  $\nu$  3415, 1638, 1400, 1120, 616, 480.

**5,5-dimethyl-6-(perfluorobenzamido)hexan-3-yl 2,2,2-trifluoroacetate (3-PG 8)**



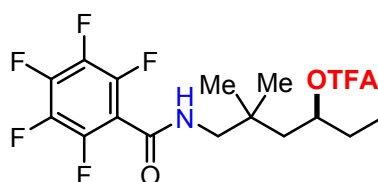

**3-PG 8**

Colourless oil. **<sup>1</sup>H NMR** (600 MHz, CDCl<sub>3</sub>) δ 6.15 (br s, 1H), 5.16–5.20 (m, 1H), 3.52 (dd, *J* = 13.8, 7.8 Hz, 1H), 3.10 (dd, *J* = 13.8, 5.4 Hz, 1H), 1.79 (dd, *J* = 15.3, 8.4 Hz, 1H), 1.66–1.76 (m, 2H), 1.57 (d, *J* = 15.3 Hz, 1H), 0.98 (d, *J* = 8.4 Hz, 6H), 0.93 (t, *J* = 7.5 Hz, 3H). **<sup>13</sup>C NMR** (100 MHz, CDCl<sub>3</sub>) δ 157.64, 157.25 (q, *J* = 42.0 Hz), 114.51 (q, *J* = 285.0 Hz), 78.17, 49.65, 42.14, 34.43, 28.62, 25.29, 24.99, 8.97. **HRMS–ESI** (*m/z*): [M+Na]<sup>+</sup> calcd. for C<sub>17</sub>H<sub>17</sub>F<sub>8</sub>NNaO<sub>7</sub>, 458.0973; found, 458.0960. **IR** (KBr, cm<sup>-1</sup>): ν 3416, 1639, 1511, 1399, 1118, 616, 482.

**5,5-dimethyl-6-(picolinamido)hexan-3-yl 2,2,2-trifluoroacetate (3-PG 9)**

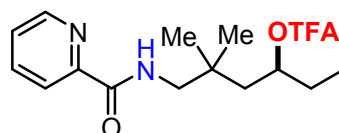

**3-PG 9**

Colourless oil. **<sup>1</sup>H NMR** (600 MHz, CDCl<sub>3</sub>) δ 8.57 (d, *J* = 4.5 Hz, 1H), 8.23 (br s, 1H), 8.20 (d, *J* = 7.8 Hz, 1H), 7.86 (t, *J* = 7.5 Hz, 1H), 7.44 (dd, *J* = 6.9, 5.4 Hz, 1H), 5.21–5.25 (m, 1H), 3.44 (dd, *J* = 13.5, 7.5 Hz, 1H), 3.19 (dd, *J* = 13.5, 6.0 Hz, 1H), 1.81 (dd, *J* = 15.3, 8.7 Hz, 1H), 1.65–1.76 (m, 2H), 1.58 (d, *J* = 13.2 Hz, 1H), 0.99 (d, *J* = 3.6 Hz, 6H), 0.91 (t, *J* = 7.5 Hz, 3H). **<sup>13</sup>C NMR** (150 MHz, CDCl<sub>3</sub>) δ 164.47, 149.78, 148.07, 137.38, 126.18, 122.31, 78.12, 49.37, 42.39, 34.53, 28.70, 25.20, 24.96, 9.03 (OCOCF<sub>3</sub> is difficult to detect). **HRMS–ESI** (*m/z*): [M+Na]<sup>+</sup> calcd. for C<sub>16</sub>H<sub>21</sub>F<sub>3</sub>N<sub>2</sub>NaO<sub>3</sub>, 369.1396; found, 369.1389. **IR** (KBr, cm<sup>-1</sup>): ν 3415, 2960, 1621, 1533, 1399, 1170, 619, 480.

**5,5-dimethyl-6-pivalamidohexan-3-yl 2,2,2-trifluoroacetate (3-PG-10)**

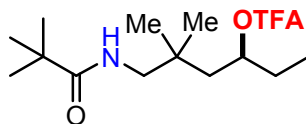

**3-PG 10**

Colourless oil.  $^1\text{H NMR}$  (600 MHz,  $\text{CDCl}_3$ )  $\delta$  5.76 (br s, 1H), 5.15–5.18 (m, 1H), 3.32 (dd,  $J = 13.8, 7.8$  Hz, 1H), 2.85 (dd,  $J = 13.8, 5.4$  Hz, 1H), 1.64–1.73 (m, 3H), 1.46 (dd,  $J = 15.3, 2.1$  Hz, 1H), 1.21 (s, 9H), 0.91 (t,  $J = 7.8$  Hz, 3H), 0.90 (s, 3H), 0.89 (s, 3H).  $^{13}\text{C NMR}$  (150 MHz,  $\text{CDCl}_3$ )  $\delta$  178.38, 157.19 (q,  $J = 42.0$  Hz), 114.59 (q, 285.0 Hz), 78.34, 48.57, 42.24, 38.88, 34.38, 28.62, 27.62, 25.31, 25.14, 8.99. **HRMS–ESI** ( $m/z$ ):  $[\text{M}+\text{Na}]^+$  calcd. for  $\text{C}_{15}\text{H}_{26}\text{F}_3\text{NNaO}_3$ , 348.1757; found, 348.1762. **IR** (KBr,  $\text{cm}^{-1}$ ):  $\nu$  3415, 2962, 1778, 1541, 1165, 702.

**6-((methoxycarbonyl)amino)-5,5-dimethylhexan-3-yl-2,2,2-trifluoroacetate (3-PG 12)**

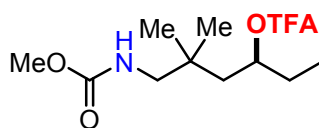

**3-PG 12**

Colourless oil.  $^1\text{H NMR}$  (400 MHz,  $\text{CDCl}_3$ )  $\delta$  5.12–5.15 (m, 1H), 4.75 (br s, 1H), 3.67 (s, 3H), 3.12 (dd,  $J = 13.8, 7.5$  Hz, 1H), 2.90 (dd,  $J = 13.8, 5.7$  Hz, 1H), 1.73 (dd,  $J = 15.5, 8.7$  Hz, 1H), 1.64–1.68 (m, 2H), 1.48 (d,  $J = 15.3$  Hz, 1H), 0.91 (t,  $J = 11.1$  Hz, 3H), 0.90 (s, 3H), 0.86 (s, 3H).  $^{13}\text{C NMR}$  (150 MHz,  $\text{CDCl}_3$ )  $\delta$  157.36, 157.18 (q,  $J = 42.0$  Hz), 114.58 (q,  $J = 285.0$  Hz), 78.13, 52.18, 51.15, 42.08, 34.18, 28.68, 24.94, 24.83, 8.98. **HRMS–ESI** ( $m/z$ ):  $[\text{M}+\text{Na}]^+$  calcd. for  $\text{C}_{12}\text{H}_{20}\text{F}_3\text{NNaO}_4$ , 322.1237; found, 322.1243. **IR** (KBr,  $\text{cm}^{-1}$ ):  $\nu$  3753, 3416, 2926, 1622, 1400, 1172, 615, 472.

**5-benzamido-4,4-dimethylpentan-2-yl 2,2,2-trifluoroacetate (3b)**

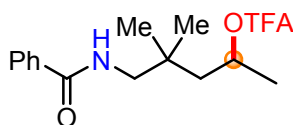

**3b**

Colourless oil.  $^1\text{H NMR}$  (600 MHz,  $\text{CDCl}_3$ )  $\delta$  7.77 (d,  $J = 7.2$  Hz, 2H), 7.51 (t,  $J = 7.5$  Hz, 1H), 7.45 (dd,  $J = 7.2, 7.5$  Hz, 2H), 6.33 (br s, 1H), 5.28–5.33 (m, 1H), 3.54 (dd,  $J = 13.8, 7.8$  Hz, 1H), 3.09 (dd,  $J = 13.8, 5.7$  Hz, 1H), 1.87 (dd,  $J = 15.3, 8.4$  Hz, 1H), 1.52 (dd,  $J = 15.3, 2.7$  Hz, 1H), 1.38 (d,  $J = 6.0$  Hz, 3H), 0.99 (d,  $J = 6.6$  Hz, 6H).  $^{13}\text{C NMR}$  (150 MHz,  $\text{CDCl}_3$ )  $\delta$  167.68, 157.00 (q,  $J = 42.0$  Hz), 134.61, 131.52, 128.63, 126.77, 114.46 (q,  $J = 285.0$  Hz), 74.24, 49.27, 44.50, 34.63, 25.41, 25.26, 21.61. **HRMS–ESI** ( $m/z$ ):  $[\text{M}+\text{Na}]^+$  calcd. for  $\text{C}_{16}\text{H}_{20}\text{F}_3\text{NNaO}_3$ , 354.1287; found, 354.1282. **IR** (KBr,  $\text{cm}^{-1}$ ):  $\nu$  3415, 2960, 1638, 1399, 1173, 616.

**1-benzamido-2,2-dimethyldecan-4-yl 2,2,2-trifluoroacetate (3c)**

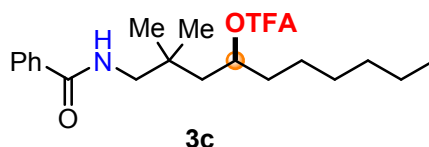

Colourless oil.  $^1\text{H NMR}$  (600 MHz,  $\text{CDCl}_3$ )  $\delta$  7.77 (d,  $J = 7.2$  Hz, 2H), 7.51 (t,  $J = 7.5$  Hz, 1H), 7.45 (dd,  $J = 7.2, 7.5$  Hz, 2H), 6.31 (br s, 1H), 5.22–5.26 (m, 1H), 3.51 (dd,  $J = 13.8, 7.5$  Hz, 1H), 3.10 (dd,  $J = 13.8, 5.7$  Hz, 1H), 1.80 (dd,  $J = 15.4, 8.4$  Hz, 1H), 1.61–1.68 (m, 2H), 1.57 (dd,  $J = 15.4, 2.4$  Hz, 1H), 1.21–1.33 (m, 8H), 0.98 (d,  $J = 1.8$  Hz, 6H), 0.87 (t,  $J = 6.9$  Hz, 3H).  $^{13}\text{C NMR}$  (150 MHz,  $\text{CDCl}_3$ )  $\delta$  167.69, 157.16 (q,  $J = 42.0$  Hz), 134.63, 131.43, 128.55, 126.78, 114.52 (q,  $J = 285.0$  Hz), 77.40, 49.38, 42.77, 35.66, 34.56, 31.49, 28.83, 25.27, 25.14, 24.68, 22.41, 13.92. **HRMS–ESI** ( $m/z$ ):  $[\text{M}+\text{Na}]^+$  calcd. for  $\text{C}_{21}\text{H}_{30}\text{F}_3\text{NNaO}_3$ , 424.2070; found, 424.2066. **IR** (KBr,  $\text{cm}^{-1}$ ):  $\nu$  3416, 2960, 1680, 1538, 1465, 1167, 711.

**1-benzamido-2,2-dimethyltetradecan-4-yl 2,2,2-trifluoroacetate (3d)**

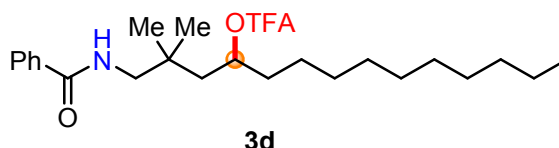

Colourless oil.  $^1\text{H NMR}$  (600 MHz,  $\text{CDCl}_3$ )  $\delta$  7.76 (d,  $J = 7.5$  Hz, 2H), 7.51 (t,  $J = 7.2$  Hz, 1H), 7.45 (dd,  $J = 7.5, 7.2$  Hz, 2H), 6.29 (br s, 1H), 5.22–5.26 (m, 1H), 3.51 (dd,  $J = 13.8, 7.5$  Hz, 1H), 3.10 (dd,  $J = 13.8, 5.4$  Hz, 1H), 1.80 (dd,  $J = 15.4, 8.4$  Hz,

1H), 1.58–1.73 (m, 2H), 1.57 (dd,  $J = 15.4, 1.8$  Hz, 1H), 1.14–1.34 (m, 16H), 0.98 (s, 6H), 0.88 (t,  $J = 6.9$  Hz, 3H).  $^{13}\text{C}$  NMR (150 MHz,  $\text{CDCl}_3$ )  $\delta$  167.67, 157.22 (q,  $J = 42.0$  Hz), 134.68, 131.50, 128.63, 126.79, 114.57 (q,  $J = 285.0$  Hz), 77.45, 49.40, 42.84, 35.71, 34.59, 31.86, 29.52, 29.44, 29.35, 29.26, 29.22, 25.40, 25.19, 24.78, 22.65, 14.07. HRMS–ESI ( $m/z$ ):  $[\text{M}+\text{Na}]^+$  calcd. for  $\text{C}_{25}\text{H}_{38}\text{F}_3\text{NNaO}_3$ , 480.2696; found, 480.2691. IR (KBr,  $\text{cm}^{-1}$ ):  $\nu$  3415, 2926, 1638, 1400, 1172, 617.

**1-benzamido-2,2-dimethyloctadecan-4-yl 2,2,2-trifluoroacetate (3e)**

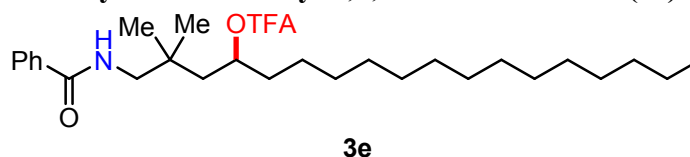

Colourless oil.  $^1\text{H}$  NMR (600 MHz,  $\text{CDCl}_3$ )  $\delta$  7.77 (d,  $J = 7.2$  Hz, 2H), 7.52 (t,  $J = 7.2$  Hz, 1H), 7.46 (dd,  $J = 7.2, 7.2$  Hz, 2H), 6.25 (br s, 1H), 5.22–5.26 (m, 1H), 3.53 (dd,  $J = 13.8, 7.5$  Hz, 1H), 3.10 (dd,  $J = 13.8, 5.4$  Hz, 1H), 1.81 (dd,  $J = 15.4, 8.4$  Hz, 1H), 1.60–1.71 (m, 2H), 1.57 (dd,  $J = 15.0, 2.4$  Hz, 1H), 1.20–1.34 (m, 24H), 0.98 (s, 3H), 0.97 (s, 3H), 0.88 (t,  $J = 6.9$  Hz, 3H).  $^{13}\text{C}$  NMR (150 MHz,  $\text{CDCl}_3$ )  $\delta$  167.66, 157.24 (q,  $J = 42.0$  Hz), 134.70, 131.53, 128.67, 126.80, 114.59 (q,  $J = 285.0$  Hz), 77.47, 49.40, 42.85, 35.74, 34.61, 31.93, 29.69, 29.68, 29.66, 29.64, 29.60, 29.48, 29.39, 29.36, 29.26, 25.46, 25.22, 24.82, 22.70, 14.12. HRMS–ESI ( $m/z$ ):  $[\text{M}+\text{Na}]^+$  calcd. for  $\text{C}_{29}\text{H}_{46}\text{F}_3\text{NNaO}_3$ , 536.3322; found, 536.3321. IR (KBr,  $\text{cm}^{-1}$ ):  $\nu$  3416, 1636, 1400, 1119, 616.

**(5-benzamido-1-cyclohexyl-4,4-dimethylpentan-2-yl 2,2,2-trifluoroacetate (3f)**

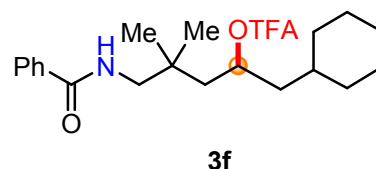

Colourless oil.  $^1\text{H}$  NMR (600 MHz,  $\text{CDCl}_3$ )  $\delta$  7.77 (d,  $J = 7.8$  Hz, 2H), 7.52 (t,  $J = 7.2$  Hz, 1H), 7.46 (dd,  $J = 7.8, 7.2$  Hz, 2H), 6.31 (br s, 1H), 5.30–5.36 (m, 1H), 3.52 (dd,  $J = 13.8, 7.5$  Hz, 1H), 3.12 (dd,  $J = 13.8, 5.4$  Hz, 1H), 1.76–1.80 (m, 2H), 1.62–

1.69 (m, 5H), 1.56–1.61 (m, 2H), 1.43–1.49 (m, 1H), 1.12–1.22 (m, 5H), 0.99 (s, 6H).  $^{13}\text{C}$  NMR (150 MHz,  $\text{CDCl}_3$ )  $\delta$  167.64, 157.22 (q,  $J = 42.0$  Hz), 134.64, 131.52, 128.64, 126.79, 114.53 (q,  $J = 285.0$  Hz), 75.62, 49.37, 43.48, 43.31, 34.66, 34.00, 33.29, 33.02, 26.27, 26.03, 25.97, 25.57, 25.21. HRMS–ESI ( $m/z$ ):  $[\text{M}+\text{Na}]^+$  calcd. for  $\text{C}_{22}\text{H}_{30}\text{F}_3\text{NNaO}_3$ , 436.2070; found, 436.2084. IR (KBr,  $\text{cm}^{-1}$ ):  $\nu$  3415, 2925, 1638, 1400, 1120, 616.

**7-benzamido-6,6-dimethyl-4-(2,2,2-trifluoroacetoxy)heptyl benzoate (3g)**

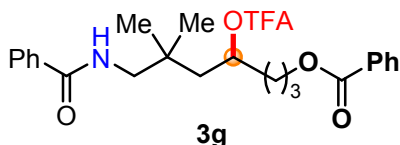

Colourless oil.  $^1\text{H}$  NMR (600 MHz,  $\text{CDCl}_3$ )  $\delta$  8.02 (d,  $J = 7.2$  Hz, 2H), 7.76 (d,  $J = 7.2$  Hz, 2H), 7.56 (t,  $J = 7.5$  Hz, 1H), 7.51 (t,  $J = 7.5$  Hz, 1H), 7.43 (dd,  $J = 7.2, 7.5$  Hz, 4H), 6.32 (br s, 1H), 5.35–5.40 (m, 1H), 4.29–4.38 (m, 2H), 3.55 (dd,  $J = 13.8, 7.5$  Hz, 1H), 3.11 (dd,  $J = 13.8, 5.4$  Hz, 1H), 1.75–1.87 (m, 5H), 1.60 (dd,  $J = 15.4, 2.4$  Hz, 1H), 0.99 (s, 6H).  $^{13}\text{C}$  NMR (150 MHz,  $\text{CDCl}_3$ )  $\delta$  167.70, 166.51, 157.26 (q,  $J = 42.0$  Hz), 134.61, 133.00, 131.53, 130.07, 129.55, 128.65, 128.38, 126.79, 114.53 (q,  $J = 285.0$  Hz), 76.70, 64.00, 49.28, 42.72, 34.67, 32.36, 25.41, 25.26, 24.21. HRMS–ESI ( $m/z$ ):  $[\text{M}+\text{Na}]^+$  calcd. for  $\text{C}_{25}\text{H}_{28}\text{F}_3\text{NNaO}_5$ , 502.1812; found, 502.1808. IR (KBr,  $\text{cm}^{-1}$ ):  $\nu$  3416, 1636, 1400, 1120, 616.

**8-benzamido-7,7-dimethyl-5-(2,2,2-trifluoroacetoxy)octyl benzoate (3h)**

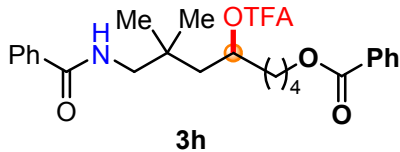

Yellow oil.  $^1\text{H}$  NMR (600 MHz,  $\text{CDCl}_3$ )  $\delta$  8.02 (d,  $J = 7.5$  Hz, 2H), 7.76 (d,  $J = 7.5$  Hz, 2H), 7.56 (t,  $J = 7.5$  Hz, 1H), 7.51 (t,  $J = 7.2$  Hz, 1H), 7.42–7.45 (m, 4H), 6.27 (br s, 1H), 5.28–5.32 (m, 1H), 4.31 (t,  $J = 6.3$  Hz, 2H), 3.54 (dd,  $J = 13.8, 7.8$  Hz, 1H), 3.10 (dd,  $J = 13.8, 5.4$  Hz, 1H), 1.73–1.84 (m, 5H), 1.58 (dd,  $J = 15.4, 2.1$  Hz, 1H), 1.45–1.52 (m, 2H), 0.98 (s, 6H).  $^{13}\text{C}$  NMR (150 MHz,  $\text{CDCl}_3$ )  $\delta$  167.70, 166.58,

157.23 (q,  $J = 42.0$  Hz), 134.57, 132.92, 131.56, 130.23, 129.51, 128.66, 128.34, 126.78, 114.53 (q,  $J = 285.0$  Hz), 64.34, 49.35, 42.81, 35.39, 34.62, 28.34, 25.30, 21.38. **HRMS–ESI** ( $m/z$ ):  $[M+Na]^+$  calcd. for  $C_{26}H_{30}F_3NNaO_5$ , 516.1968; found: 516.1964. **IR** (KBr,  $cm^{-1}$ ):  $\nu$  3418, 1637, 1400, 1120, 615.

**1-benzamido-2,2-dimethyl-7-(tosyloxy)heptan-4-yl 2,2,2-trifluoroacetate(3i)**

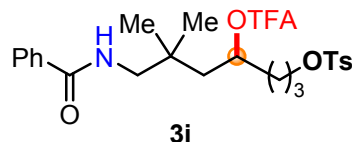

Colourless oil.  **$^1H$  NMR** (600 MHz,  $CDCl_3$ )  $\delta$  7.77 (d,  $J = 7.8$  Hz, 2H), 7.76 (d,  $J = 7.5$  Hz, 1H), 7.52 (d,  $J = 7.5$  Hz, 2H), 7.46 (dd,  $J = 7.5, 7.5$  Hz, 2H), 7.34 (d,  $J = 7.8$  Hz, 2H), 6.27 (br s, 1H), 5.25–5.29 (m, 1H), 4.00–4.08 (m, 2H), 3.50 (dd,  $J = 13.8, 7.5$  Hz, 1H), 3.10 (dd,  $J = 13.8, 5.7$  Hz, 1H), 2.45 (s, 3H), 1.77 (dd,  $J = 15.4, 8.4$  Hz, 1H), 1.64–1.73 (m, 4H), 1.53 (dd,  $J = 15.3, 2.4$  Hz, 1H), 0.96 (s, 6H).  **$^{13}C$  NMR** (100 MHz,  $CDCl_3$ )  $\delta$  167.73, 157.20 (q,  $J = 42.0$  Hz), 144.96, 134.51, 132.85, 131.58, 129.91, 128.68, 127.86, 126.81, 114.44 (q,  $J = 285.0$  Hz), 76.19, 69.45, 49.23, 42.66, 34.66, 31.84, 25.42, 25.16, 24.31, 21.62. **HRMS–ESI** ( $m/z$ ):  $[M+Na]^+$  calcd. for  $C_{25}H_{30}F_3NNaO_6S$ , 552.1638; found, 552.1633. **IR** (KBr,  $cm^{-1}$ ):  $\nu$  3417, 1637, 1400, 1120, 615.

**1-benzamido-2,2-dimethyl-8-(tosyloxy)octan-4-yl 2,2,2-trifluoroacetate (3j)**

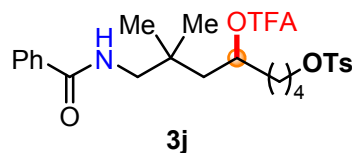

Colourless oil.  **$^1H$  NMR** (600 MHz,  $CDCl_3$ )  $\delta$  7.77 (d,  $J = 8.1$  Hz, 4H), 7.52 (t,  $J = 7.2$  Hz, 1H), 7.46 (dd,  $J = 8.1, 7.5$  Hz, 2H), 7.34 (d,  $J = 8.1$  Hz, 2H), 6.28 (br s, 1H), 5.20–5.24 (m, 1H), 4.00 (t,  $J = 6.3$  Hz, 2H), 3.53 (dd,  $J = 13.8, 7.8$  Hz, 1H), 3.07 (dd,  $J = 13.8, 5.4$  Hz, 1H), 2.45 (s, 3H), 1.77 (dd,  $J = 15.3, 8.7$  Hz, 1H), 1.62–1.66 (m, 4H), 1.53 (d,  $J = 15.3$  Hz, 1H), 1.31–1.38 (m, 2H), 0.96 (s, 6H).  **$^{13}C$  NMR** (150 MHz,  $CDCl_3$ )  $\delta$  167.72, 157.19 (q,  $J = 42.0$  Hz), 144.85, 134.59, 132.97, 131.60, 129.89,

128.70, 127.87, 126.82, 114.51 (q,  $J = 285.0$  Hz), 76.78, 69.88, 49.34, 42.65, 34.99, 34.64, 28.40, 25.38, 25.23, 21.64, 20.77. **HRMS-ESI** ( $m/z$ ):  $[M+Na]^+$  calcd. for  $C_{26}H_{32}F_3NNaO_6S$ , 566.1795; found: 566.1793. **IR** (KBr,  $cm^{-1}$ ):  $\nu$  3417, 1636, 1400, 1119, 616.

**3-(benzamidomethyl)-3-ethylnonan-5-yl 2,2,2-trifluoroacetate (3k)**

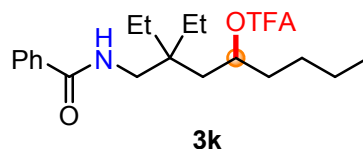

Yellow oil.  **$^1H$  NMR** (600 MHz,  $CDCl_3$ )  $\delta$  7.75 (d,  $J = 7.5$  Hz, 2H), 7.52 (t,  $J = 7.2$  Hz, 1H), 7.45 (dd,  $J = 7.2, 7.5$  Hz, 2H), 6.18 (br s, 1H), 5.26–5.29 (m, 1H), 3.69 (dd,  $J = 14.4, 8.4$  Hz, 1H), 2.97 (dd,  $J = 14.4, 4.8$  Hz, 1H), 1.78 (dd,  $J = 16.2, 9.0$  Hz, 1H), 1.65–1.70 (m, 2H), 1.60 (d,  $J = 18.9$  Hz, 1H), 1.23–1.37 (m, 8H), 0.87–0.91 (m, 9H).  **$^{13}C$  NMR** (150 MHz,  $CDCl_3$ )  $\delta$  167.45, 156.63 (q,  $J = 42.0$  Hz), 134.67, 131.47, 128.63, 126.74, 114.55 (q,  $J = 285.0$  Hz), 77.16, 43.73, 39.22, 37.58, 35.56, 26.92, 26.64, 22.39, 13.83, 7.43, 7.38. **HRMS-ESI** ( $m/z$ ):  $[M+Na]^+$  calcd. for  $C_{21}H_{30}F_3NO_3Na$ , 424.2070; found: 424.2064. **IR** (KBr,  $cm^{-1}$ ):  $\nu$  3751, 3415, 2927, 1640, 1400, 1126, 704, 614.

**3-(benzamidomethyl)-3-methylnonan-5-yl -2,2,2-trifluoroacetate (3l)**

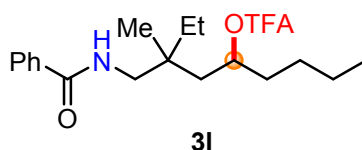

Colourless oil.  **$^1H$  NMR** (600 MHz,  $CDCl_3$ )  $\delta$  7.76 (d,  $J = 8.1$  Hz,  $1/2 \times 4H$ ,  $1/2 \times 4H$ ), 7.51 (t,  $J = 6.9$  Hz,  $1/2 \times 2H$ ,  $1/2 \times 2H$ ), 7.45 (dd,  $J = 8.1, 6.9$  Hz,  $1/2 \times 4H$ ,  $1/2 \times 4H$ ), 6.22 (br s,  $1/2 \times 2H$ ,  $1/2 \times 2H$ ), 5.21–5.29 (m,  $1/2 \times 2H$ ,  $1/2 \times 2H$ ), 3.60 (t,  $J = 6.9$  Hz, 1H), 3.58 (t,  $J = 6.9$  Hz, 1H), 3.09 (t,  $J = 4.8$  Hz, 1H), 3.06 (t,  $J = 4.8$  Hz, 1H), 1.82 (dd,  $J = 15.6, 8.4$  Hz, 1H), 1.78 (dd,  $J = 15.6, 8.4$  Hz, 1H), 1.63–1.67 (m,  $1/2 \times 4H$ ,  $1/2 \times 4H$ ), 1.61 (dd,  $J = 15.6, 2.4$  Hz, 1H), 1.55 (dd,  $J = 15.6, 2.4$  Hz, 1H), 1.27–1.38 (m,  $1/2 \times 12H$ ,  $1/2 \times 12H$ ), 0.93 (s, 3H), 0.91 (s, 3H), 0.91 (t,  $J = 7.2$  Hz, 3H), 0.90 (t,  $J$

= 7.2 Hz, 3H), 0.89 (t,  $J = 6.9$  Hz, 3H), 0.88 (t,  $J = 6.9$  Hz, 3H).  $^{13}\text{C}$  NMR (150 MHz,  $\text{CDCl}_3$ )  $\delta$  167.60, 167.57, 157.24 (q,  $J = 42.0$  Hz), 157.15 (q,  $J = 42.0$  Hz), 134.70, 134.68, 131.50, 131.49, 128.65, 128.64, 126.77, 126.75, 114.57 (q,  $J = 285.0$  Hz), 114.55 (q,  $J = 285.0$  Hz), 77.29, 77.26, 46.86, 46.84, 40.46, 39.98, 37.02, 36.89, 35.52, 35.48, 30.40, 30.17, 26.94, 26.90, 22.68, 22.44, 22.36, 13.83, 7.90, 7.88. **HRMS–ESI** ( $m/z$ ):  $[\text{M}+\text{Na}]^+$  calcd. for  $\text{C}_{20}\text{H}_{28}\text{F}_3\text{NNaO}_3$ , 410.1913; found, 410.1913. **IR** (KBr,  $\text{cm}^{-1}$ ):  $\nu$  3417, 1638, 1400, 1122, 616.

**4-(benzamidomethyl)-4-propylheptan-2-yl 2,2,2-trifluoroacetate (3m)**

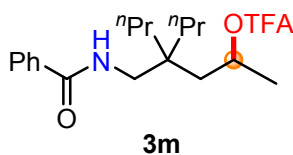

Yellow oil.  $^1\text{H}$  NMR (600 MHz,  $\text{CDCl}_3$ )  $\delta$  7.75 (d,  $J = 7.2$  Hz, 2H), 7.52 (t,  $J = 7.5$  Hz, 1H), 7.46 (dd,  $J = 7.5, 7.2$  Hz, 2H), 6.19 (br s, 1H), 5.29–5.34 (m, 1H), 3.71 (dd,  $J = 14.1, 8.1$  Hz, 1H), 2.97 (dd,  $J = 14.1, 4.8$  Hz, 1H), 1.85 (dd,  $J = 15.8, 8.7$  Hz, 1H), 1.53 (dd,  $J = 15.9, 2.1$  Hz, 1H), 1.38 (d,  $J = 6.3$  Hz, 3H), 1.13–1.35 (m, 9H), 0.92 (t,  $J = 6.9$  Hz, 3H), 0.88 (t,  $J = 7.2$  Hz, 3H).  $^{13}\text{C}$  NMR (150 MHz,  $\text{CDCl}_3$ )  $\delta$  167.48, 156.97 (q,  $J = 42.0$  Hz), 134.74, 131.46, 128.65, 126.72, 114.46 (q,  $J = 285.0$  Hz) 74.09, 44.63, 40.49, 39.35, 37.67, 37.43, 21.72, 16.28, 14.76, 14.72. **HRMS–ESI** ( $m/z$ ):  $[\text{M}+\text{Na}]^+$  calcd. for  $\text{C}_{20}\text{H}_{28}\text{F}_3\text{NNaO}_3$ , 410.1913; found, 410.1903. **IR** (KBr,  $\text{cm}^{-1}$ ):  $\nu$  3417, 1636, 1400, 1120, 616.

**4-(benzamidomethyl)-4,5-dimethylhexan-2-yl 2,2,2-trifluoroacetate (3n)**

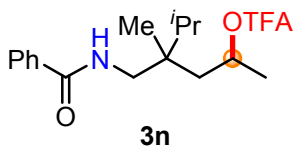

Yellow oil.  $^1\text{H}$  NMR (600 MHz,  $\text{CDCl}_3$ )  $\delta$  7.76 (t,  $J = 6.9$  Hz,  $1/2 \times 4\text{H}$ ,  $1/2 \times 4\text{H}$ ), 7.51 (t,  $J = 7.8$  Hz,  $1/2 \times 2\text{H}$ ,  $1/2 \times 2\text{H}$ ), 7.46 (dd,  $J = 6.9, 7.8$  Hz,  $1/2 \times 4\text{H}$ ,  $1/2 \times 4\text{H}$ ), 6.22 (br s,  $1/2 \times 2\text{H}$ ,  $1/2 \times 2\text{H}$ ), 5.31–5.37 (m,  $1/2 \times 2\text{H}$ ,  $1/2 \times 2\text{H}$ ), 3.85 (dd,  $J = 14.1, 8.4$



Hz, 1H), 3.73 (dd,  $J = 14.1, 8.1$  Hz, 1H), 3.10 (dd,  $J = 14.1, 4.8$  Hz, 1H), 2.97 (dd,  $J = 14.1, 4.8$  Hz, 1H), 1.93 (dd,  $J = 15.6, 9.0$  Hz, 1H), 1.86 (dd,  $J = 15.6, 8.4$  Hz, 1H), 1.67 (dd,  $J = 16.2, 3.0$  Hz, 1H), 1.63–1.69 (sept,  $J = 6.6$  Hz,  $1/2 \times 2H, 1/2 \times 2H$ ), 1.54 (d,  $J = 16.2$  Hz, 1H), 1.39 (d,  $J = 6.6$  Hz, 3H), 1.38 (d,  $J = 6.6$  Hz, 3H), 0.97 (d,  $J = 6.9$  Hz, 3H), 0.95 (d,  $J = 6.9$  Hz, 3H), 0.92 (d,  $J = 6.9$  Hz, 3H), 0.91 (d,  $J = 6.9$  Hz, 3H), 0.91 (s, 3H), 0.85 (s, 3H).  $^{13}C$  NMR (100 MHz,  $CDCl_3$ )  $\delta$  167.60, 167.54, 157.01 (q,  $J = 42.0$  Hz), 156.86 (q,  $J = 42.0$  Hz), 134.68, 134.67, 131.49, 131.47, 128.66, 128.62, 126.76, 126.70, 114.49 (q,  $J = 285.0$  Hz), 114.45 (q,  $J = 285.0$  Hz), 74.27, 74.21, 45.48, 45.18, 41.21, 40.44, 39.27, 38.90, 33.17, 32.84, 21.82, 21.69, 19.42, 18.74, 17.32, 17.30, 17.20, 17.15. HRMS–ESI ( $m/z$ ):  $[M+Na]^+$  calcd. for  $C_{18}H_{24}F_3NNaO_3$ , 382.1600; Found: 382.1579. IR (KBr,  $cm^{-1}$ ):  $\nu$  3415, 2964, 1779, 1649, 1381, 1200, 715.

#### 1-(1-(benzamidomethyl)cyclohexyl)butan-2-yl 2,2,2-trifluoroacetate (3o)

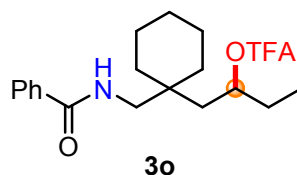

Colourless oil.  $^1H$  NMR (600 MHz,  $CDCl_3$ )  $\delta$  7.76 (d,  $J = 7.2$  Hz, 2H), 7.51 (t,  $J = 7.5$  Hz, 1H), 7.45 (dd,  $J = 7.2, 7.5$  Hz, 2H), 6.32 (br s, 1H), 5.25–5.29 (m, 1H), 3.92 (dd,  $J = 14.1, 8.7$  Hz, 1H), 2.93 (dd,  $J = 14.1, 4.5$  Hz, 1H), 1.85 (dd,  $J = 15.8, 8.1$  Hz, 1H), 1.65–1.78 (m, 2H), 1.58–1.65 (m, 1H), 1.61 (dd,  $J = 15.8, 3.6$  Hz, 1H), 1.51–1.58 (m, 1H), 1.42–1.51 (m, 4H), 1.25–1.41 (m, 4H), 0.94 (t,  $J = 7.5$  Hz, 3H).  $^{13}C$  NMR (150 MHz,  $CDCl_3$ )  $\delta$  167.57, 157.21 (q,  $J = 42.0$  Hz), 134.64, 131.44, 128.60, 126.75, 114.57 (q,  $J = 285.0$  Hz), 78.32, 36.69, 34.12, 34.00, 28.73, 25.97, 21.40, 21.24, 9.09. HRMS–ESI ( $m/z$ ):  $[M+H]^+$  calcd. for  $C_{20}H_{27}F_3NO_3$ , 386.1938; found, 386.1943. IR (KBr,  $cm^{-1}$ ):  $\nu$  3415, 2930, 1777, 1642, 1398, 1172, 710.

#### 1-(1-(benzamidomethyl)cyclohexyl)octan-2-yl 2,2,2-trifluoroacetate (3p)

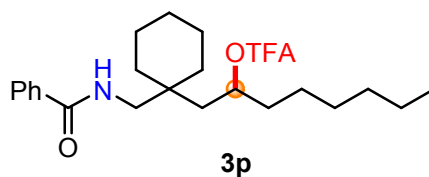

Colourless oil. **<sup>1</sup>H NMR** (600 MHz, CDCl<sub>3</sub>)  $\delta$  7.76 (d,  $J$  = 7.5 Hz, 2H), 7.51 (t,  $J$  = 7.5 Hz, 1H), 7.45 (dd,  $J$  = 7.5, 7.5 Hz, 2H), 6.31 (br s, 1H), 5.25–5.32 (m, 1H), 3.92 (dd,  $J$  = 14.1, 8.7 Hz, 1H), 2.93 (dd,  $J$  = 14.1, 4.5 Hz, 1H), 1.85 (dd,  $J$  = 15.7, 8.1 Hz, 1H), 1.61–1.73 (m, 3H), 1.51–1.58 (m, 1H), 1.20–1.51 (m, 17H), 0.87 (t,  $J$  = 6.9 Hz, 3H). **<sup>13</sup>C NMR** (150 MHz, CDCl<sub>3</sub>)  $\delta$  167.51, 157.20 (q,  $J$  = 42.0 Hz), 134.64, 131.45, 128.61, 126.77, 114.56 (q,  $J$  = 285.0 Hz), 77.42, 36.74, 35.77, 34.13, 34.10, 31.56, 28.92, 25.99, 24.81, 22.46, 21.42, 21.26, 14.00. **HRMS–ESI** ( $m/z$ ): [M+Na]<sup>+</sup> calcd. for C<sub>24</sub>H<sub>34</sub>F<sub>3</sub>NNaO<sub>3</sub>, 464.2383; found, 464.2380. **IR** (KBr, cm<sup>-1</sup>):  $\nu$  3414, 2925, 1641, 1400, 1128, 699.

#### 5-benzamido-4-methylpentan-2-yl 2,2,2-trifluoroacetate (3q)

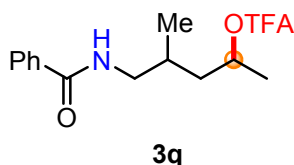

Colourless oil. **<sup>1</sup>H NMR** (600 MHz, CDCl<sub>3</sub>)  $\delta$  7.77 (d,  $J$  = 7.5 Hz, 2H), 7.51 (d,  $J$  = 7.2 Hz, 1H), 7.45 (dd,  $J$  = 7.5, 7.1 Hz, 2H), 6.28 (br s, 1H), 5.24–5.30 (m, 1H), 3.39–3.44 (m, 1H), 3.33–3.38 (m, 1H), 1.85–1.91 (m, 1H), 1.65–1.72 (m, 2H), 1.37 (d,  $J$  = 6.3 Hz, 3H), 1.02 (t,  $J$  = 6.9 Hz, 3H). **<sup>13</sup>C NMR** (150 MHz, CDCl<sub>3</sub>)  $\delta$  167.73, 157.13 (q,  $J$  = 42.0 Hz), 134.51, 131.53, 128.63, 126.80, 114.53 (q,  $J$  = 285.0 Hz), 75.11, 45.40, 40.02, 30.55, 19.77, 17.94. **HRMS–ESI** ( $m/z$ ): [M+Na]<sup>+</sup> calcd. for C<sub>15</sub>H<sub>18</sub>F<sub>3</sub>NNaO<sub>3</sub>, 340.1131; found, 340.1122. **IR** (KBr, cm<sup>-1</sup>):  $\nu$  3415, 2959, 1640, 1380, 1150, 803, 700.

#### 4-(benzamidomethyl)heptan-2-yl 2,2,2-trifluoroacetate (3r)

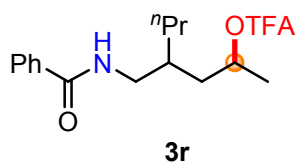

Colourless oil. **<sup>1</sup>H NMR** (600 MHz, CDCl<sub>3</sub>) δ 7.75 (d, *J* = 7.2 Hz, 2H), 7.51 (t, *J* = 7.2 Hz, 1H), 7.44 (dd, *J* = 7.2, 7.2 Hz, 2H), 6.23 (br s, 1H), 5.29–5.35 (m, 1H), 3.56–3.60 (m, 1H), 3.29–3.34 (m, 1H), 1.76–1.80 (m, 1H), 1.67–1.74 (m, 1H), 1.55–1.62 (m, 1H), 1.38–1.43 (m, 3H), 1.37 (d, *J* = 12.0 Hz, 3H), 1.28–1.32 (m, 1H), 0.92 (t, *J* = 6.6 Hz, 3H). **<sup>13</sup>C NMR** (150 MHz, CDCl<sub>3</sub>) δ 167.77, 157.23 (q, *J* = 42.0 Hz), 134.54, 131.51, 128.63, 126.78, 114.56 (q, *J* = 285.0 Hz), 75.15, 42.99, 38.04, 34.91, 34.56, 20.15, 19.69, 14.14. **HRMS–ESI** (*m/z*): [M+Na]<sup>+</sup> calcd. for C<sub>17</sub>H<sub>22</sub>F<sub>3</sub>NNaO<sub>3</sub>, 368.1444; Found: 368.1441. **IR** (KBr, cm<sup>-1</sup>): ν 3415, 2961, 1780, 1639, 1399, 1170, 703, 616.

#### 4-(benzamidomethyl)-5-methylhexan-2-yl 2,2,2-trifluoroacetate (3s)

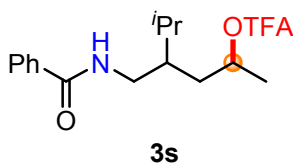

Colourless oil. **<sup>1</sup>H NMR** (600 MHz, CDCl<sub>3</sub>) δ 7.77 (d, *J* = 7.8 Hz, 2H), 7.51 (t, *J* = 7.5 Hz, 1H), 7.45 (dd, *J* = 7.8, 7.5 Hz, 2H), 6.16 (br s, 1H), 5.27–5.33 (m, 1H), 3.52–3.58 (m, 1H), 3.39–3.45 (m, 1H), 1.83 (sept, *J* = 7.8 Hz, 1H), 1.77–1.80 (m, 1H), 1.52 (d, *J* = 3.6 Hz, 1H), 1.50 (d, *J* = 3.6 Hz, 1H), 1.38 (d, *J* = 6.3 Hz, 3H), 0.96 (d, *J* = 6.9 Hz, 3H), 0.94 (d, *J* = 6.9 Hz, 3H). **<sup>13</sup>C NMR** (150 MHz, CDCl<sub>3</sub>) δ 167.66, 157.40 (q, *J* = 42.0 Hz), 134.51, 131.51, 128.64, 126.79, 114.59 (q, *J* = 285.0 Hz) 75.51, 41.53, 40.87, 35.41, 29.10, 20.32, 19.63, 18.46. **HRMS–ESI** (*m/z*): [M+Na]<sup>+</sup> calcd. for C<sub>17</sub>H<sub>22</sub>F<sub>3</sub>NNaO<sub>3</sub>, 368.1444; found, 368.1443. **IR** (KBr, cm<sup>-1</sup>): ν 3415, 1622, 1400, 1122, 616.

#### 1-benzamidoctan-4-yl 2,2,2-trifluoroacetate (3t)

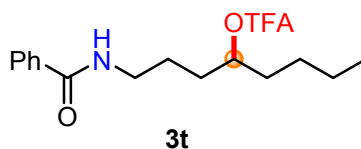

Colourless oil. **<sup>1</sup>H NMR** (600 MHz, CDCl<sub>3</sub>)  $\delta$  7.76 (d,  $J$  = 7.8 Hz, 2H), 7.51 (t,  $J$  = 7.2 Hz, 1H), 7.44 (t,  $J$  = 7.5 Hz, 2H), 6.18 (br s, 1H), 5.08–5.14 (m, 1H), 3.44–3.53 (m, 2H), 1.73–1.79 (m, 2H), 1.60–1.72 (m, 4H), 1.27–1.36 (m, 4H), 0.90 (t,  $J$  = 6.5 Hz, 3H). **<sup>13</sup>C NMR** (150 MHz, CDCl<sub>3</sub>)  $\delta$  167.58, 157.41 (q,  $J$  = 42.0 Hz), 134.49, 131.51, 128.61, 126.81, 114.63 (q,  $J$  = 285.0 Hz), 79.50, 39.51, 33.35, 31.11, 27.09, 25.49, 22.32, 13.82. **HRMS–ESI** ( $m/z$ ): [M+Na]<sup>+</sup> calcd. for C<sub>17</sub>H<sub>22</sub>F<sub>3</sub>NNaO<sub>3</sub>, 368.1444; found, 368.1442. **IR** (KBr, cm<sup>-1</sup>):  $\nu$  3415, 2960, 1465, 1174, 618.

#### 6-benzamidoheptan-3-yl 2,2,2-trifluoroacetate (3v)

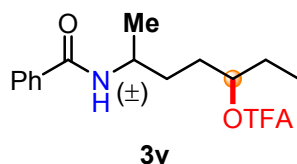

Colourless oil. **<sup>1</sup>H NMR** (600 MHz, CDCl<sub>3</sub>)  $\delta$  7.75 (d,  $J$  = 6.6 Hz, 2H), 7.51 (t,  $J$  = 7.5 Hz, 1H), 7.44 (dd,  $J$  = 7.5, 6.6 Hz, 2H), 5.87 (d,  $J$  = 8.4 Hz, 1H), 5.04–5.09 (m, 1H), 4.22–4.28 (m, 1H), 1.75–1.78 (m, 2H), 1.68–1.73 (m, 2H), 1.53–1.61 (m, 2H), 1.26 (d,  $J$  = 6.6 Hz, 3H), 0.92 (t,  $J$  = 7.5 Hz, 3H). **<sup>13</sup>C NMR** (150 MHz, CDCl<sub>3</sub>)  $\delta$  166.97, 157.38 (q,  $J$  = 42.0 Hz), 134.67, 131.45, 128.58, 126.77, 114.69 (q,  $J$  = 285.0 Hz), 80.70, 45.15, 32.70, 29.91, 26.71, 21.19, 9.23. **HRMS–ESI** ( $m/z$ ): [M+Na]<sup>+</sup> calcd. for C<sub>16</sub>H<sub>20</sub>F<sub>3</sub>NNaO<sub>3</sub>, 354.1287; found, 354.1294. **IR** (KBr, cm<sup>-1</sup>):  $\nu$  3416, 1637, 1400, 1172, 616.

#### (1-benzamidocyclopentyl)octan-3-yl 2,2,2-trifluoroacetate (3w)

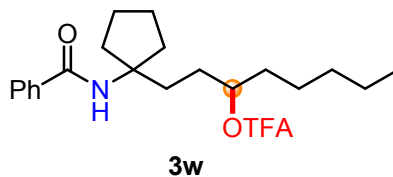

Colourless oil. **<sup>1</sup>H NMR** (600 MHz, CDCl<sub>3</sub>)  $\delta$  7.70 (d,  $J$  = 7.2 Hz, 2H), 7.50 (t,  $J$  =

7.5 Hz, 1H), 7.43 (dd,  $J = 7.2, 7.5$  Hz, 2H), 5.81 (br s, 1H), 5.04 (quint,  $J = 6.0$  Hz, 1H), 2.08–2.14 (m, 2H), 2.01–2.03 (m, 1H), 1.89–1.94 (m, 1H), 1.62–1.75 (m, 10H), 1.23–1.33 (m, 6H), 0.85 (t,  $J = 6.6$  Hz, 3H).  $^{13}\text{C}$  NMR (150 MHz,  $\text{CDCl}_3$ )  $\delta$  167.00, 157.28 (q,  $J = 42.0$  Hz), 135.52, 131.30, 128.59, 126.65, 114.65 (q,  $J = 285.0$ ), 80.12, 64.69, 38.33, 38.24, 33.19, 32.16, 31.35, 29.31, 24.59, 23.56, 22.38, 13.86. HRMS–ESI ( $m/z$ ):  $[\text{M}+\text{Na}]^+$  calcd. for  $\text{C}_{22}\text{H}_{30}\text{F}_3\text{NNaO}_3$ , 436.2070; found, 430.2064. IR (KBr,  $\text{cm}^{-1}$ ):  $\nu$  3415, 1637, 1400, 1175, 618.

**2-benzamido-5-(2,2,2-trifluoroacetoxy)hexyl pivalate (3x)**

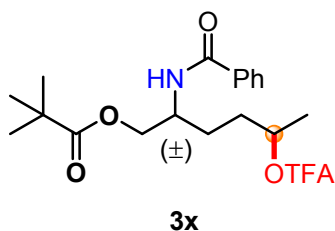

Colourless oil.  $^1\text{H}$  NMR (600 MHz,  $\text{CDCl}_3$ )  $\delta$  7.76 (d,  $J = 7.8$  Hz, 2H), 7.53 (t,  $J = 7.2$  Hz, 1H), 7.46 (dd,  $J = 7.5$  Hz, 2H), 6.35 (d,  $J = 8.7$  Hz, 1H), 5.15–5.20 (m, 1H), 4.45–4.51 (m, 1H), 4.34 (dd,  $J = 11.7, 6.3$  Hz, 1H), 4.12 (dd,  $J = 11.7, 3.6$  Hz, 1H), 1.75–1.87 (m, 2H), 1.59–1.65 (m, 2H), 1.37 (d,  $J = 6.3$  Hz, 3H), 1.19 (s, 9H).  $^{13}\text{C}$  NMR (150 MHz,  $\text{CDCl}_3$ )  $\delta$  178.97, 167.13, 157.09 (q,  $J = 42.0$  Hz), 134.01, 131.73, 128.68, 126.83, 114.51 (q,  $J = 285.0$  Hz), 75.93, 65.61, 48.78, 38.93, 31.78, 27.54, 27.09, 19.59. HRMS–ESI ( $m/z$ ):  $[\text{M}+\text{Na}]^+$  calcd. for  $\text{C}_{20}\text{H}_{26}\text{F}_3\text{NNaO}_5$ , 440.1655; found, 440.1662. IR (KBr,  $\text{cm}^{-1}$ ):  $\nu$  3416, 1638, 1400, 1168, 617.

**6-acetoxy-5-benzamidohexan-2-yl 2,2,2-trifluoroacetate (3y)**

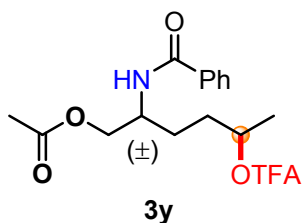

Colourless oil.  $^1\text{H}$  NMR (600 MHz,  $\text{CDCl}_3$ )  $\delta$  7.77 (d,  $J = 7.5$  Hz, 2H), 7.53 (t,  $J = 6.9$  Hz, 1H), 7.46 (dd,  $J = 7.5, 6.9$  Hz, 2H), 6.34 (d,  $J = 9.0$  Hz, 1H), 5.15–5.20 (m,

1H), 4.39–4.50 (m, 1H), 4.32 (dd,  $J = 11.5, 5.4$  Hz, 1H), 4.10–4.17 (m, 1H), 2.09 (s, 3H), 1.89–1.95 (m, 1H), 1.81–1.86 (m, 1H), 1.74–1.79 (m, 1H), 1.63–1.67 (m, 1H), 1.37 (d,  $J = 6.0$  Hz, 3H).  $^{13}\text{C}$  NMR (150 MHz,  $\text{CDCl}_3$ )  $\delta$  171.40, 167.23, 157.10 (q,  $J = 42.0$  Hz), 134.05, 131.76, 128.69, 126.88, 114.53 (q,  $J = 285.0$  Hz), 75.89, 65.87, 48.54, 31.78, 27.45, 20.75, 19.58. **HRMS–ESI** ( $m/z$ ):  $[\text{M}+\text{Na}]^+$  calcd. for  $\text{C}_{17}\text{H}_{20}\text{F}_3\text{NNaO}_5$ , 398.1186; found, 398.1192. **IR** (KBr,  $\text{cm}^{-1}$ ):  $\nu$  3415, 1638, 1398, 1171, 616.

### 2-benzamido-5-(2,2,2-trifluoroacetoxy)hexyl benzoate (3z)

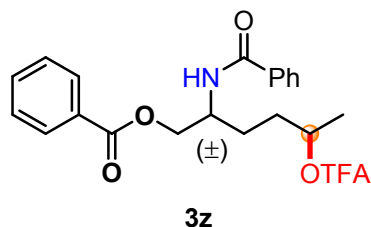

Colourless oil.  $^1\text{H}$  NMR (600 MHz,  $\text{CDCl}_3$ )  $\delta$  8.02 (d,  $J = 7.8$  Hz, 2H), 7.77 (d,  $J = 7.5$  Hz, 2H), 7.59 (t,  $J = 7.1$  Hz, 1H), 7.51 (t,  $J = 6.9$  Hz, 1H), 7.45 (dd,  $J = 7.5, 7.1$  Hz, 4H), 6.45 (d,  $J = 8.4$  Hz, 1H), 5.17–5.22 (m, 1H), 4.57–4.63 (m, 1H), 4.53 (dt,  $J = 11.4, 6.0$  Hz, 1H), 4.43–4.47 (m, 1H), 1.96–2.00 (m, 1H), 1.81–1.86 (m, 1H), 1.75–1.80 (m, 2H), 1.38 (d,  $J = 6.3$  Hz, 3H).  $^{13}\text{C}$  NMR (150 MHz,  $\text{CDCl}_3$ )  $\delta$  167.34, 166.93, 157.12 (q,  $J = 42.0$  Hz), 134.09, 133.42, 131.73, 129.65, 129.45, 128.68, 128.53, 126.89, 114.53 (q,  $J = 285.0$  Hz), 75.92, 66.38, 48.80, 31.84, 27.59, 19.60. **HRMS–ESI** ( $m/z$ ):  $[\text{M}+\text{Na}]^+$  calcd. for  $\text{C}_{22}\text{H}_{22}\text{F}_3\text{NNaO}_5$ , 460.1342; found, 460.1333. **IR** (KBr,  $\text{cm}^{-1}$ ):  $\nu$  3417, 1636, 1400, 1119, 615.

### 2-benzamido-5-(2,2,2-trifluoroacetoxy)hexyl-2,3,4,5,6-pentafluorobenzoate (3aa)

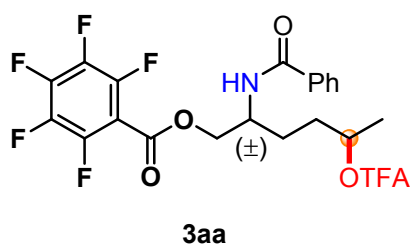

Yellow oil.  $^1\text{H NMR}$  (600 MHz,  $\text{CDCl}_3$ )  $\delta$  7.77 (d,  $J = 7.5$  Hz, 2H), 7.53 (t,  $J = 7.2$  Hz, 1H), 7.46 (dd,  $J = 7.5, 7.3$  Hz, 2H), 6.29 (d,  $J = 8.2$  Hz, 1H), 4.58 (dd,  $J = 10.8, 3.6$  Hz, 1H), 4.52–4.56 (m, 1H), 4.50 (dd,  $J = 10.2, 3.0$  Hz, 1H), 4.16 (dd,  $J = 12.7, 6.4$  Hz, 1H), 1.88–2.02 (m, 3H), 1.72–1.82 (m, 1H), 1.72 (d,  $J = 6.6$  Hz, 3H).  $^{13}\text{C NMR}$  (150 MHz,  $\text{CDCl}_3$ )  $\delta$  167.13, 133.95, 131.83, 128.70, 126.88, 67.99, 53.39, 50.91, 48.40, 37.46, 29.95, 26.37. (OCOCF<sub>3</sub> is difficult to detect). **HRMS–ESI** ( $m/z$ ):  $[\text{M}+\text{Na}]^+$  calcd. for  $\text{C}_{22}\text{H}_{17}\text{F}_8\text{NNaO}_5$ , 550.0871; Found: 550.0860. **IR** (KBr,  $\text{cm}^{-1}$ ):  $\nu$  3417, 1638, 1400, 1118, 616.

**methyl-2-benzamido-5-(2,2,2-trifluoroacetoxy)hexanoate (3ab)**

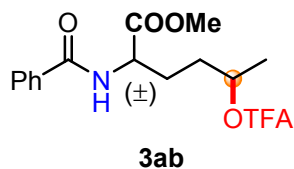

Colourless oil.  $^1\text{H NMR}$  (600 MHz,  $\text{CDCl}_3$ )  $\delta$  7.82 (d,  $J = 7.5$  Hz, 2H), 7.54 (t,  $J = 7.2$  Hz, 1H), 7.47 (dd,  $J = 7.5, 7.2$  Hz, 2H), 6.75 (d,  $J = 6.9$  Hz, 1H), 5.13–5.18 (m, 1H), 4.86–4.89 (m, 1H), 3.81 (s, 3H), 2.03–2.11 (m, 1H), 1.71–1.84 (m, 3H), 1.36 (d,  $J = 6.3$  Hz, 3H).  $^{13}\text{C NMR}$  (150 MHz,  $\text{CDCl}_3$ )  $\delta$  172.62, 167.10, 157.05 (q,  $J = 42.0$  Hz) 133.62, 131.96, 128.68, 127.03, 114.50 (q,  $J = 285.0$  Hz), 75.66, 52.77, 51.86, 31.21, 28.63, 19.56. **HRMS–ESI** ( $m/z$ ):  $[\text{M}+\text{Na}]^+$  calcd. for  $\text{C}_{16}\text{H}_{18}\text{F}_3\text{NNaO}_5$ , 384.1029; found: 384.1029. **IR** (KBr,  $\text{cm}^{-1}$ ):  $\nu$  3415, 1620, 1400, 1121, 617.

**(±)-ethyl-2-benzamido-5-(2,2,2-trifluoroacetoxy)hexanoate (3ac)**

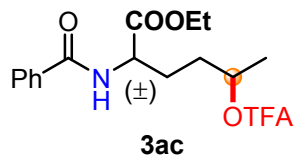

Colourless oil.  $^1\text{H NMR}$  (400 MHz,  $\text{CDCl}_3$ )  $\delta$  7.82 (d,  $J = 7.2$  Hz, 2H), 7.53 (t,  $J = 7.2$  Hz, 1H), 7.47 (dd,  $J = 7.2, 7.2$  Hz, 2H), 6.74 (d,  $J = 7.5$  Hz, 1H), 4.79–4.87 (m, 1H), 4.26 (q,  $J = 7.2$  Hz, 2H), 4.10–4.18 (m, 1H), 2.20–2.28 (m, 1H), 1.83–1.99 (m,

3H), 1.71 (d,  $J = 6.6$  Hz, 3H), 1.32 (t,  $J = 7.2$  Hz, 3H).  $^{13}\text{C}$  NMR (150 MHz,  $\text{CDCl}_3$ )  $\delta$  172.15, 167.09, 157.04 (q,  $J = 42.0$  Hz), 133.68, 131.92, 128.67, 127.02, 114.50 (q,  $J = 285.0$  Hz), 75.68, 61.97, 51.87, 31.14, 28.62, 19.58, 14.08. HRMS-ESI ( $m/z$ ):  $[\text{M}+\text{Na}]^+$  calcd. for  $\text{C}_{17}\text{H}_{20}\text{F}_3\text{NNaO}_5$ , 398.1186; found, 398.1183. IR (KBr,  $\text{cm}^{-1}$ ):  $\nu$  3416, 1637, 1400, 1172, 616.

**methyl-2-benzamido-5-(2,2,2-trifluoroacetoxy)decanoate (3ad)**

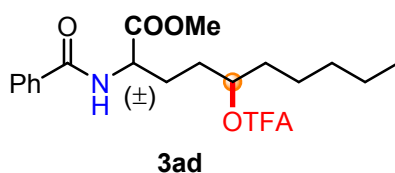

Colourless oil.  $^1\text{H}$  NMR (400 MHz,  $\text{CDCl}_3$ )  $\delta$  7.81 (d,  $J = 6.9$  Hz,  $2/5 \times 2$  H,  $3/5 \times 2$  H), 7.53 (t,  $J = 7.2$  Hz,  $2/5 \times 1$  H,  $3/5 \times 1$  H), 7.45 (dd,  $J = 7.2, 6.9$  Hz,  $2/5 \times 2$  H,  $3/5 \times 2$  H), 6.68–6.78 (m,  $2/5 \times 1$  H,  $3/5 \times 1$  H), 5.08–5.14 (m,  $2/5 \times 1$  H), 4.81–4.89 (m,  $2/5 \times 1$  H,  $3/5 \times 1$  H), 3.98–4.05 (m,  $3/5 \times 1$  H), 3.79 (s,  $2/5 \times 3$  H,  $3/5 \times 3$  H), 2.24–2.29 (m,  $2/5 \times 1$  H,  $3/5 \times 1$  H), 1.99–2.07 (m,  $3/5 \times 1$  H), 1.25–2.00 (m,  $2/5 \times 11$  H,  $3/5 \times 11$  H), 0.88 (t,  $J = 6.0$  Hz,  $2/5 \times 3$  H,  $3/5 \times 3$  H).  $^{13}\text{C}$  NMR (150 MHz,  $\text{CDCl}_3$ )  $\delta$  172.64, 172.56, 167.10, 167.06, 133.65, 133.63, 131.95 (C $\times 2$ ), 128.68 (C $\times 2$ ), 127.03 (C $\times 2$ ), 79.17, 79.06, 52.76, 52.74, 52.17, 51.88, 33.61, 33.32, 31.32, 31.29, 29.51, 29.45, 28.59, 28.18, 24.56, 24.53, 22.35 (C $\times 2$ ), 13.86 (C $\times 2$ ). (OCOCF $_3$  is difficult to detect). HRMS-ESI ( $m/z$ ):  $[\text{M}+\text{Na}]^+$  calcd. for  $\text{C}_{20}\text{H}_{26}\text{F}_3\text{NNaO}_3$ , 440.1655; found, 440.1662. IR (KBr,  $\text{cm}^{-1}$ ):  $\nu$  3416, 1636, 1400, 1119, 616.

**methyl-2-benzamido-5-cyclohexyl-5-(2,2,2-trifluoroacetoxy)pentanoate (3ae)**

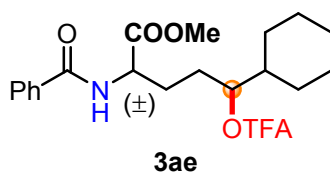

Colourless oil.  $^1\text{H}$  NMR (600 MHz,  $\text{CDCl}_3$ )  $\delta$  7.76 (d,  $J = 7.8$  Hz,  $2/5 \times 2$  H,  $3/5 \times 2$



H), 7.54 (t,  $J = 6.9$  Hz,  $2/5 \times 1$  H,  $3/5 \times 1$  H), 7.46 (dd,  $J = 8.1, 6.9$  Hz,  $2/5 \times 2$  H,  $3/5 \times 2$  H), 6.70 (d,  $J = 7.2$  Hz,  $3/5 \times 1$  H), 6.68 (d,  $J = 7.2$  Hz,  $2/5 \times 1$  H), 4.86–4.89 (m,  $2/5 \times 1$  H), 4.81–4.86 (m,  $3/5 \times 1$  H), 3.97–4.00 (m,  $2/5 \times 1$  H), 3.92–3.96 (m,  $3/5 \times 1$  H), 3.80 (s,  $2/5 \times 3$  H,  $3/5 \times 3$  H), 2.28–2.33 (m,  $3/5 \times 1$  H), 2.05–2.16 (m,  $2/5 \times 1$  H), 1.64–2.01 (m,  $2/5 \times 7$  H,  $3/5 \times 7$  H), 1.47–1.55 (m,  $3/5 \times 1$  H,  $2/5 \times 1$  H), 1.18–1.28 (m,  $3/5 \times 6$  H), 1.10–1.17 (m,  $2/5 \times 6$  H).  $^{13}\text{C}$  NMR (150 MHz,  $\text{CDCl}_3$ )  $\delta$  172.88, 172.82, 167.15, 167.06, 133.78, 133.76, 131.87(2 $\times$ C), 128.66, 128.65, 127.05 (C $\times$ 2), 64.65, 64.57, 52.68, 52.63, 52.19, 51.83, 44.65, 44.30, 32.08, 31.87, 31.52, 31.33, 30.88, 30.83, 29.40, 29.30, 26.16 (C $\times$ 2), 26.07 (C $\times$ 2), 25.95 (C $\times$ 2) (OCOCF $_3$  is difficult to detect).  $^1\text{H}$ HRMS–ESI ( $m/z$ ):  $[\text{M}+\text{Na}]^+$  calcd. for  $\text{C}_{21}\text{H}_{26}\text{F}_3\text{NNaO}_5$ , 452.1655; found, 452.1646. IR (KBr,  $\text{cm}^{-1}$ ):  $\nu$  3415, 1621, 1400, 1120, 617.

**7-benzamido-8-methoxy-8-oxo-4-(2,2,2-trifluoroacetoxy)octyl benzoate (3af)**

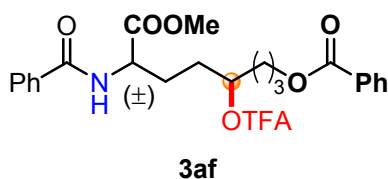

Colourless oil.  $^1\text{H}$  NMR (600 MHz,  $\text{CDCl}_3$ )  $\delta$  8.02 (d,  $J = 7.2$  Hz, 2 H), 7.80 (d,  $J = 7.8$  Hz, 2 H), 7.56 (t,  $J = 7.2$  Hz, 2H), 7.45 (dd,  $J = 7.2, 7.8$  Hz, 4H), 6.75 (d,  $J = 7.8$  Hz, 1H), 5.23 (br s, 1H), 4.88–4.90 (m, 1H), 4.30–4.38 (m, 2H), 3.80 (s, 3H), 2.28–2.34 (m, 1H), 1.74–2.09 (m, 7H).  $^{13}\text{C}$  NMR (100 MHz,  $\text{CDCl}_3$ )  $\delta$  172.55, 167.13, 166.46, 157.27 (q,  $J = 42.0$  Hz), 133.59, 133.01, 131.96, 130.04, 129.54, 128.68, 128.38, 127.03, 114.56 (q,  $J = 285.0$  Hz), 78.36, 63.98, 52.79, 51.78, 30.40, 29.55, 28.60, 24.38. HRMS–ESI ( $m/z$ ):  $[\text{M}+\text{Na}]^+$  calcd. for  $\text{C}_{25}\text{H}_{26}\text{NF}_3\text{NaO}_7$ , 532.1554; found, 532.1553. IR (KBr,  $\text{cm}^{-1}$ ):  $\nu$  3415, 1722, 1534, 1277, 714.

**(3R,5R,8R,9S,10S,13R,14S,17R)-17-((2R,4R)-7-benzamido-6,6-dimethyl-4-(2,2,2-trifluoroacetoxy)heptan-2-yl)-10,13-dimethylhexadecahydro-1H-cyclopenta[a]phenanthren-3-yl benzoate (3ag)**

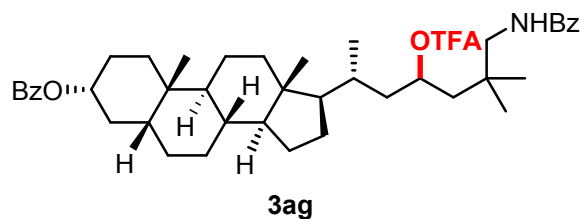

Colourless oil.  $^1\text{H NMR}$  (400 MHz,  $\text{CDCl}_3$ )  $\delta$  8.05 (d,  $J = 7.2$  Hz, 2H), 7.78 (d,  $J = 7.2$  Hz, 2H), 7.55 (t,  $J = 7.5$  Hz, 1H), 7.52 (t,  $J = 7.5$  Hz, 1H), 7.45 (dd,  $J = 7.2, 7.5$  Hz, 2H), 7.43 (dd,  $J = 7.2, 7.5$  Hz, 2H), 6.35 (t,  $J = 6.4$  Hz, 1H), 5.40 (br s, 1H), 4.92–5.03 (m, 1H), 3.52 (dd,  $J = 13.7, 7.6$  Hz, 1H), 3.14 (dd,  $J = 13.7, 5.6$  Hz, 1H), 1.95–1.98 (m, 2H), 1.79–1.92 (m, 6H), 1.66–1.69 (m, 1H), 1.52–1.57 (m, 4H), 1.36–1.49 (m, 4H), 1.26–1.32 (m, 3H), 1.20–1.22 (m, 2H), 1.14–1.17 (m, 2H), 1.04–1.11 (m, 4H), 0.99 (s, 6H), 0.98 (s, 3H), 0.96 (s, 3H), 0.62 (s, 3H).  $^{13}\text{C NMR}$  (150 MHz,  $\text{CDCl}_3$ )  $\delta$  167.64, 166.12, 157.47 (q,  $J = 42.0$  Hz), 134.62, 132.66, 131.52, 130.93, 129.50, 128.64, 128.24, 126.81, 114.59 (q,  $J = 285.0$  Hz), 75.48, 74.99, 56.47, 56.30, 49.48, 44.31, 43.15, 42.81, 41.94, 40.45, 40.06, 35.76, 35.06, 34.75, 34.63, 32.50, 32.36, 28.37, 27.02, 26.76, 26.31, 25.50, 25.36, 24.12, 23.35, 20.82, 18.86, 11.80. **HRMS-ESI** ( $m/z$ ):  $[\text{M}+\text{Na}]^+$  calcd. for  $\text{C}_{44}\text{H}_{58}\text{F}_3\text{NNaO}_5$ , 760.4159; found, 760.4153. **IR** (KBr,  $\text{cm}^{-1}$ ):  $\nu$  3416, 1636, 1400, 1120, 616.

### Late-stage functionalization of steroids compounds:

#### Preparation of 4ag:

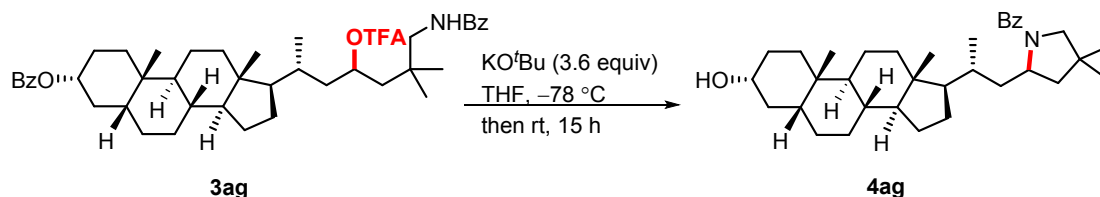

**Procedure:** KO<sup>t</sup>Bu (13 mg, 0.12 mmol, 3.6 equiv) was added to an oven-dried vial and then THF (0.2 mL) was added under argon atmosphere. The mixture was cooled to  $-78$  °C. Five minutes later, a solution of **3ag** (23.9 mg, 0.032 mmol, 1.0 equiv) in THF (0.4 mL) was slowly added and stirring for another 30 min at that temperature. Then, the reaction was allowed to warm to room temperature and stirred for 5 hours. The reaction was diluted with water, extracted with EtOAc and washed with brine.

The combined solvent was dried with Na<sub>2</sub>SO<sub>4</sub> and concentrated under reduce pressure. The desired residue was purified by flash column chromatography on silica gel (PE:EA:DCM = 5:1:0.5 as eluent) to give the title product **4ag**.

**((2R)-2-((2R)-2-((3R,5R,8R,10S,13R,14S,17R)-3-hydroxy-10,13-dimethylhexadecahydro-1H-cyclopenta[a]phenanthren-17-yl)propyl)-4,4-dimethylpyrrolidin-1-yl)(phenyl)methanone (4ag)**

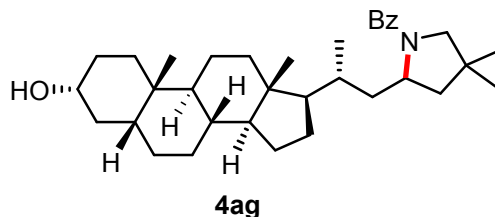

Colourless oil. <sup>1</sup>H NMR (600 MHz, CDCl<sub>3</sub>) δ 7.80 (d, *J* = 7.5 Hz, 2H), 7.49 (t, *J* = 7.2 Hz, 1H), 7.44 (dd, *J* = 7.5, 7.2 Hz, 2H), 7.30 (t, *J* = 6.0 Hz, 1H), 3.91–3.97 (m, 1H), 3.59–3.67 (m, 1H), 3.51 (dd, *J* = 13.5, 6.3 Hz, 1H), 3.31 (dd, *J* = 13.5, 6.9 Hz, 1H), 2.16 (d, *J* = 5.1 Hz, 1H), 1.99–2.01 (m, 1H), 1.77–1.88 (m, 4H), 1.63–1.70 (m, 1H), 1.48–1.62 (m, 4H), 1.36–1.45 (m, 6H), 1.17–1.30 (m, 6H), 1.04–1.11 (m, 5H), 1.02 (s, 3H), 0.98 (d, *J* = 8.7 Hz, 3H), 0.97 (s, 3H), 0.92 (s, 3H), 0.69 (s, 3H). <sup>13</sup>C NMR (150 MHz, CDCl<sub>3</sub>) δ 167.45, 135.05, 131.17, 128.49, 126.90, 71.86, 66.18, 56.85, 56.56, 48.80, 47.84, 46.10, 42.86, 42.07, 40.42, 40.25, 36.44, 35.83, 35.32, 34.80, 34.56, 32.49, 30.54, 29.69 (grease), 28.61, 28.57, 27.18, 26.40, 24.86, 24.19, 23.36, 20.82, 18.54, 12.13. HRMS–ESI (*m/z*): [M+H]<sup>+</sup> calcd. for C<sub>35</sub>H<sub>53</sub>NHO<sub>2</sub>, 520.4149; found, 520.4149. IR (KBr, cm<sup>-1</sup>): ν 3752, 3415, 1623, 1400, 1120, 615.

**Preparation of 5ag:**

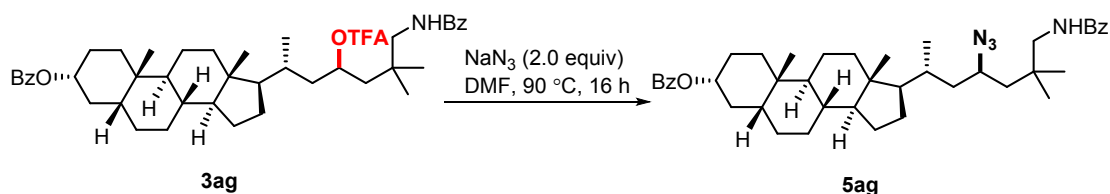

**Procedure:** **3ag** (23.5 mg, 0.032 mmol, 1.0 equiv), NaN<sub>3</sub> (4.2 mg, 0.064 mmol, 2.0 equiv), DMF (0.15 mL), were added to an oven-dried vial, and the mixture was heated at 90 °C for 6 hours. The reaction was diluted with water, extracted with

EtOAc and washed with brine. The combined solvent was dried with anhydrous Na<sub>2</sub>SO<sub>4</sub> and concentrated under reduce pressure. The desired residue was purified by flash column chromatography on silica gel (PE:EA:DCM = 10:1:0.5 as eluent) to give the title product **5ag**.

**(3R,5R,8R,10S,13R,14S,17R)-17-((2R,4R)-4-azido-7-benzamido-6,6-dimethylheptan-2-yl)-10,13-dimethylhexadecahydro-1H-cyclopenta[a]phenanthren-3-yl benzoate (**5ag**)**

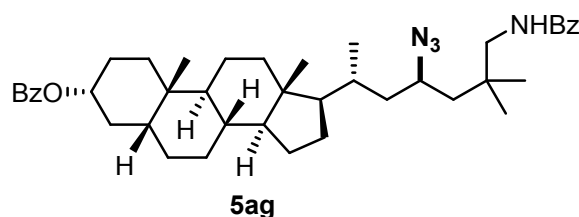

Colourless oil. <sup>1</sup>H NMR (600 MHz, CDCl<sub>3</sub>) δ 8.05 (d, *J* = 8.1 Hz, 1/2×4H, 1/2×4H), 7.78 (d, *J* = 7.2 Hz, 1/2×4H, 1/2×4H), 7.55 (t, *J* = 7.5 Hz, 1/2×2H, 1/2×2H), 7.51 (t, *J* = 6.6 Hz, 1/2×2H, 1/2×2H), 7.45 (dd, *J* = 8.1, 7.2 Hz, 1/2×4H, 1/2×4H), 7.43 (dd, *J* = 7.2, 6.6 Hz, 1/2×4H, 1/2×4H), 6.64 (t, *J* = 6.0 Hz, 1H), 6.45 (t, *J* = 6.1 Hz, 1H), 4.94–5.01 (m, 1/2×2H, 1/2×2H), 3.59 (dd, *J* = 13.7, 7.8 Hz, 1H), 3.52 (dd, *J* = 13.5, 7.5 Hz, 1H), 3.40–3.54 (m, 1/2×2H, 1/2×2H), 3.23 (dd, *J* = 13.8, 5.7 Hz, 1H), 3.17 (dd, *J* = 13.8, 5.1 Hz, 1H), 1.92–2.00 (m, 1/2×4H, 1/2×4H), 1.75–1.93 (m, 1/2×10H, 1/2×10H), 1.61–1.69 (m, 1/2×6H, 1/2×6H), 1.49–1.55 (m, 1/2×4H, 1/2×4H), 1.36–1.47 (m, 1/2×14H, 1/2×14H), 1.25–1.31 (m, 1/2×7H, 1/2×7H), 1.07–1.13 (m, 1/2×11H, 1/2×11H), 1.06 (s, 3H), 1.03 (s, 3H), 1.02 (s, 3H), 1.00 (s, 3H), 0.99 (s, 3H), 0.97 (d, *J* = 6.6 Hz, 3H), 0.96 (s, 6H), 0.70 (s, 3H), 0.66 (s, 3H). <sup>13</sup>C NMR (150 MHz, CDCl<sub>3</sub>) δ 167.49, 167.37, 166.13, 134.87, 134.81, 132.68, 132.66, 131.42, 131.37, 130.94, 130.92, 129.51, 128.63, 128.61, 128.24, 126.81, 75.00, 74.97, 57.24, 56.76, 56.51, 56.48, 56.46, 49.18, 48.45, 44.84, 43.14, 42.99, 42.86, 41.95, 41.94, 41.59, 40.48, 40.45, 40.19, 40.16, 35.80, 35.79, 35.07, 34.81, 34.73, 34.65, 33.53, 33.30, 32.36, 28.60, 28.45, 27.03, 26.85, 26.77, 26.33, 26.31, 26.16, 25.23, 25.13, 24.19, 24.14, 23.37, 20.86, 18.76, 18.53, 12.05, 12.04. HRMS–ESI (*m/z*): [M+Na]<sup>+</sup> calcd. for C<sub>42</sub>H<sub>58</sub>N<sub>4</sub>NaO<sub>3</sub>, 689.4401; found, 689.4400. IR (KBr, cm<sup>-1</sup>): ν 3418, 1637, 1400,

1118, 614.

### Preparation of 6ag and 7ag:

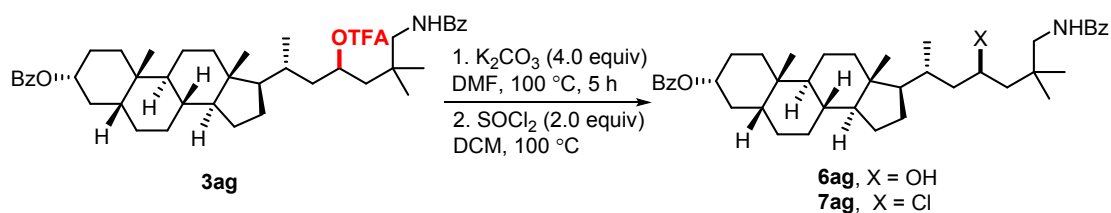

**Procedure:** **3ag** (23.5 mg, 0.032 mmol, 1.0 equiv),  $K_2CO_3$  (28 mg, 0.2 mmol, 4.0 equiv), DMF (0.1 mL) were added to an oven-dried vial, and the mixture was heated at 100 °C for 5 hours. The reaction was diluted with water, extracted with EtOAc and washed with brine. The combined solvent was dried with  $Na_2SO_4$  and concentrated under reduce pressure. The desired residue was purified by flash column chromatography on silica gel (PE:EA:DCM = 5:1:0.5 as eluent) to give the title product **6ag**.

To a solution of **6ag** (10.8 mg, 0.02 mmol, 1.0 equiv) in DCM (0.1 mL) was added  $SOCl_2$  (0.04 mmol, 2.0 equiv) at room temperature then the vial was sealed with a cap and heated at 100 °C for 1.5 hours. The vial was allowed to cool to room temperature. The solvent was then removed in vacuo and the residue was further purified with flash column chromatography (PE: EtOAc: DCM = 5:1:0.5) to give the titled compound **7ag**.

**(3R,5R,8R,10S,13R,14S,17R)-17-((2R,4R)-7-benzamido-4-hydroxy-6,6-dimethylheptan-2-yl)-10,13-dimethylhexadecahydro-1H-cyclopenta[a]phenanthren-3-yl benzoate (6ag)**

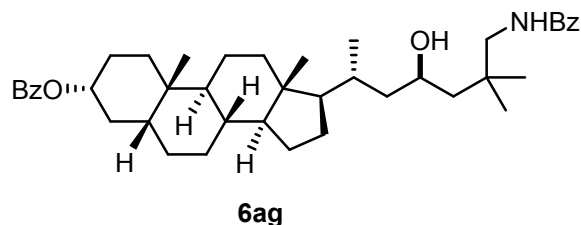

Colourless oil.  $^1H$  NMR (600 MHz,  $CDCl_3$ )  $\delta$  8.05 (d,  $J = 7.2$  Hz, 2H), 7.80 (d,  $J = 7.2$  Hz, 2H), 7.54 (t,  $J = 7.5$  Hz, 1H), 7.49 (t,  $J = 7.2$  Hz, 1H), 7.43 (dd,  $J = 7.2, 7.5$  Hz, 2H), 7.42 (dd,  $J = 7.2, 7.2$  Hz, 2H), 7.29 (t,  $J = 6.3$  Hz, 1H), 4.95–5.00 (m, 1H), 3.93–3.96 (m, 1H), 3.52 (dd,  $J = 13.5, 6.3$  Hz, 1H), 3.31 (dd,  $J = 13.5, 6.9$  Hz, 1H),

2.15 (d,  $J = 4.5$  Hz, 1H), 2.01–2.03 (m, 1H), 1.97 (q,  $J = 12.0$  Hz, 1H), 1.79–1.91 (m, 4H), 1.66–1.71 (m, 1H), 1.50–1.60 (m, 6H), 1.39–1.47 (m, 4H), 1.26–1.31 (m, 3H), 1.18–1.23 (m, 3H), 1.06–1.15 (m, 5H), 1.02 (s, 3H), 1.00 (d,  $J = 6.6$  Hz, 3H), 0.98 (s, 3H), 0.97 (s, 3H), 0.71 (s, 3H).  $^{13}\text{C}$  NMR (150 MHz,  $\text{CDCl}_3$ )  $\delta$  167.45, 166.14, 135.03, 132.67, 131.18, 130.93, 129.51, 128.50, 128.24, 126.90, 75.00, 66.16, 56.90, 56.55, 48.79, 47.83, 46.11, 42.88, 41.95, 40.48, 40.22, 35.80, 35.07, 34.80, 34.65, 32.48, 32.36, 29.69 (grease), 28.61, 28.57, 27.05, 26.76, 26.34, 24.86, 24.18, 23.36, 20.87, 18.56, 12.15. HRMS–ESI ( $m/z$ ):  $[\text{M}+\text{Na}]^+$  calcd. for  $\text{C}_{42}\text{H}_{59}\text{NNaO}_4$ , 664.4336; found, 664.4331. IR (KBr,  $\text{cm}^{-1}$ ):  $\nu$  3415, 2926, 1622, 1400, 1119, 615.

**(3R,5R,8R,10S,13R,14S,17R)-17-((2R,4R)-7-benzamido-4-chloro-6,6-dimethylheptan-2-yl)-10,13-dimethylhexadecahydro-1H-cyclopenta[a]phenanthren-3-yl benzoate (7ag)**

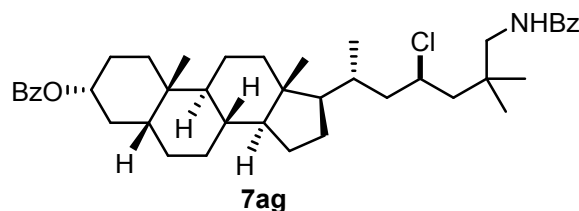

Colourless oil.  $^1\text{H}$  NMR (600 MHz,  $\text{CDCl}_3$ )  $\delta$  8.05 (d,  $J = 7.2$  Hz, 2H), 7.78 (d,  $J = 7.2$  Hz, 2H), 7.55 (t,  $J = 7.5$  Hz, 1H), 7.51 (t,  $J = 7.2$  Hz, 1H), 7.45 (dd,  $J = 7.2, 7.5$  Hz, 2H), 7.43 (dd,  $J = 7.2, 7.2$  Hz, 2H), 6.49–6.51 (m, 1H), 4.95–5.00 (m, 1H), 4.12–4.16 (m, 1H), 3.63 (dd,  $J = 13.8, 8.1$  Hz, 1H), 3.24 (dd,  $J = 13.8, 5.1$  Hz, 1H), 1.92–2.03 (m, 4H), 1.77–1.89 (m, 5H), 1.67–1.69 (m, 1H), 1.57–1.63 (m, 2H), 1.39–1.47 (m, 4H), 1.27–1.30 (m, 4H), 1.17–1.22 (m, 3H), 1.08–1.14 (dt,  $J = 16.2, 4.5$  Hz, 5H), 1.06 (s, 3H), 1.01 (s, 3H), 0.97 (s, 3H), 0.96 (d,  $J = 6.0$  Hz, 3H), 0.71 (s, 3H).  $^{13}\text{C}$  NMR (150 MHz,  $\text{CDCl}_3$ )  $\delta$  167.43, 166.13, 134.86, 132.66, 131.39, 130.96, 129.51, 128.62, 128.24, 126.82, 75.02, 58.26, 56.56, 56.51, 49.42, 48.41, 47.35, 42.93, 41.97, 40.50, 40.23, 35.81, 35.33, 35.09, 34.67, 33.32, 32.38, 28.25, 27.05, 26.78, 26.70, 26.35, 25.23, 24.18, 23.38, 20.88, 18.03, 12.14. HRMS–ESI ( $m/z$ ):  $[\text{M}+\text{Na}]^+$  calcd. for  $\text{C}_{42}\text{H}_{58}\text{ClNNaO}_3$ , 682.3997; found, 682.3998. IR (KBr,  $\text{cm}^{-1}$ ):  $\nu$  3415, 2927, 1622, 1400, 1118, 616.

### Preparation of 8ag:

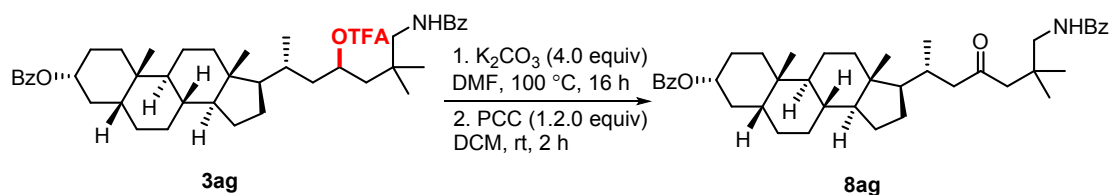

**Procedure:** PCC (5 mg, 0.024 mmol, 1.2 equiv) was added to a solution of **6ag** (10.8 mg, 0.02 mmol, 1.0 equiv) in DCM (0.1 mL), then stirred for 2 hours. The vial was allowed to cool to room temperature. The solvent was then removed in vacuo and the residue was further purified with flash column chromatography (PE: EtOAc: DCM = 5:1:0.5) to give the titled compound **8ag**.

**(3R,5R,8R,10S,13R,14S,17R)-17-((R)-7-benzamido-6,6-dimethyl-4-oxoheptan-2-yl)-10,13-dimethylhexadecahydro-1H-cyclopenta[a]phenanthren-3-yl benzoate (8ag)**

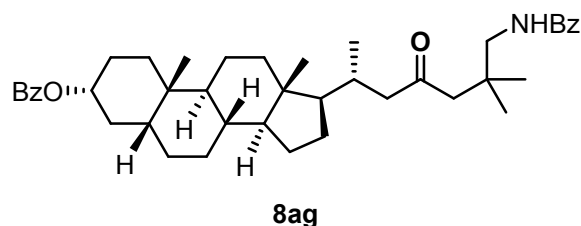

Colourless oil.  $^1H$  NMR (600 MHz,  $CDCl_3$ )  $\delta$  8.05 (d,  $J = 7.8$  Hz, 2H), 7.86 (d,  $J = 7.5$  Hz, 2H), 7.55 (t,  $J = 7.2$  Hz, 1H), 7.51 (t,  $J = 7.2$  Hz, 1H), 7.46 (dd,  $J = 7.8, 7.2$  Hz, 2H), 7.44 (dd,  $J = 7.5, 7.2$  Hz, 2H), 7.37 (t,  $J = 5.4$  Hz, 1H), 4.94–5.02 (m, 1H), 3.42 (dd,  $J = 13.8, 6.3$  Hz, 1H), 3.32 (dd,  $J = 13.8, 6.0$  Hz, 1H), 2.51 (dd,  $J = 16.5, 2.1$  Hz, 1H), 2.44 (s, 2H), 2.21 (dd,  $J = 16.4, 9.9$  Hz, 1H), 1.95–2.00 (m, 3H), 1.76–1.90 (m, 4H), 1.67–1.69 (m, 1H), 1.52–1.62 (m, 5H), 1.40–1.47 (m, 4H), 1.25–1.29 (m, 3H), 1.10–1.15 (m, 4H), 1.08 (s, 3H), 1.07 (s, 3H), 0.96 (s, 3H), 0.92 (d,  $J = 6.3$  Hz, 3H), 0.70 (s, 3H).  $^{13}C$  NMR (150 MHz,  $CDCl_3$ )  $\delta$  213.09, 167.31, 166.12, 134.64, 132.68, 131.29, 130.89, 129.49, 128.52, 128.24, 126.94, 74.97, 56.51, 56.04, 52.98, 52.47, 49.50, 42.81, 41.90, 40.41, 40.02, 35.77, 35.41, 35.05, 34.63, 32.57, 32.34, 28.52, 27.00, 26.74, 26.67, 26.43, 26.30, 24.14, 23.34, 20.81, 19.84, 12.07. **HRMS-ESI** ( $m/z$ ):  $[M+Na]^+$  calcd. for  $C_{42}H_{57}NNaO_4$ , 662.4180; found, 662.4172. **IR** (KBr,  $cm^{-1}$ ):  $\nu$  3415, 1636, 1400, 1119, 616.

## Comparative experiments.

Suárez:<sup>4</sup>

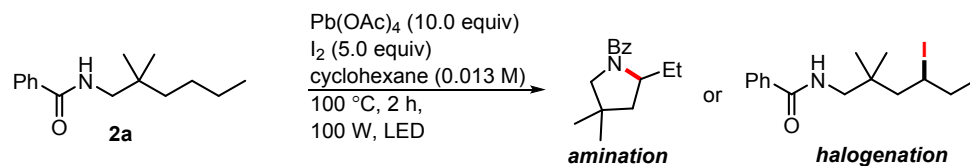

**Procedure:** To an oven-dried 25 mL round bottom flask with a condenser, **2a** (23.3 mg, 0.10 mmol, 1.0 equiv), Pb(OAc)<sub>4</sub> (443.38 mg, 1 mmol, 10 equiv), I<sub>2</sub> (127 mg, 0.5 mmol, 5.0 equiv), 7.5 mL cyclohexane were added sequentially under nitrogen atmosphere. The reaction mixture was irradiation with 100 W LED and stirred at 100 °C for 2 hours. After completion, the reaction mixture was cooled down to room temperature and the solvent was removed under reduced pressure. The result was determined by crude <sup>1</sup>H NMR.

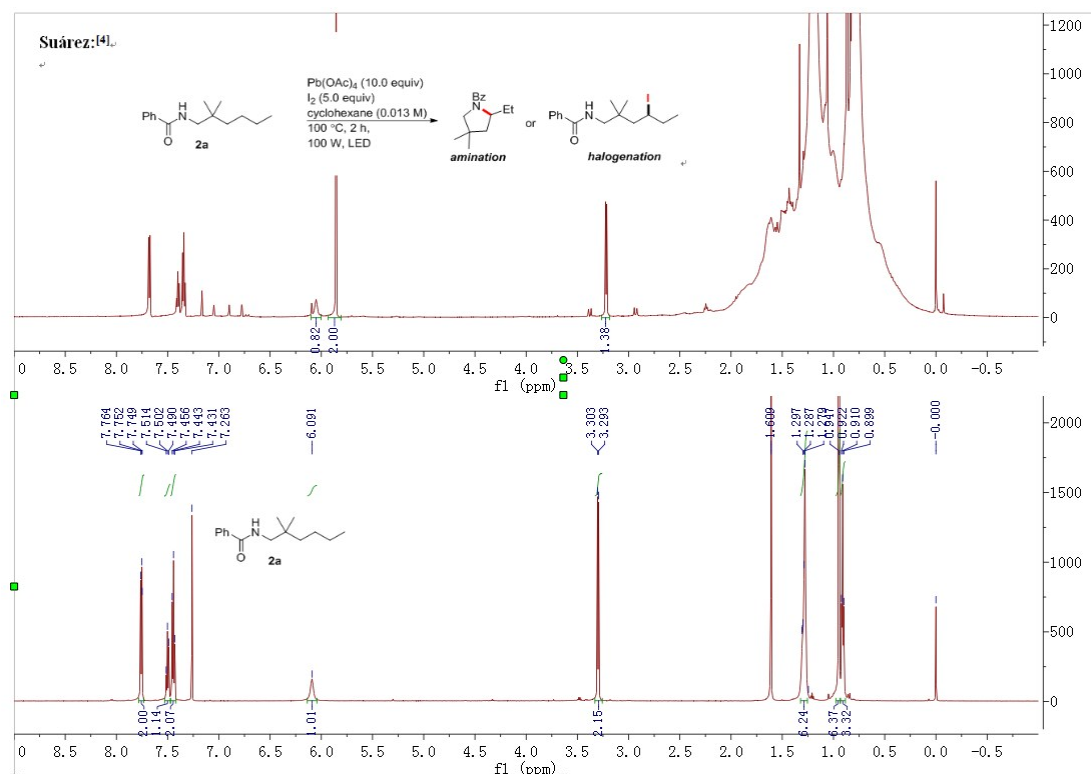

Muñiz:<sup>5</sup>



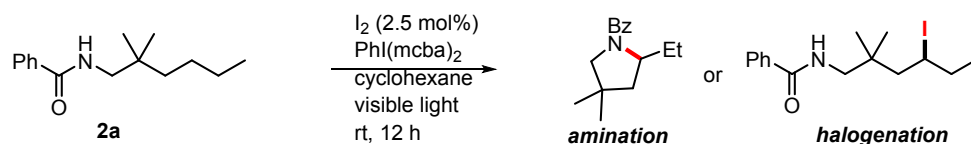

**Procedure:** A Schlenk tube equipped with a stirrer bar is charged with PhI(mcba)<sub>2</sub> (113 mg, 0.22 mmol, 1.0 equiv), and the amide **2a** (23.3 mg, 0.10 mmol, 1.0 equiv), evacuated, and backfilled with argon, before 1.5 mL of absolute dichloroethane are added. The solution is stirred at 25 °C for 12 h under visible light. After completion, the reaction mixture was cooled down to room temperature and the solvent was removed under reduced pressure. The result was determined by crude <sup>1</sup>H NMR. 90 % of SM was recovered. (We have successfully reproduced the Muñiz reaction with sulphoamide under this condition).

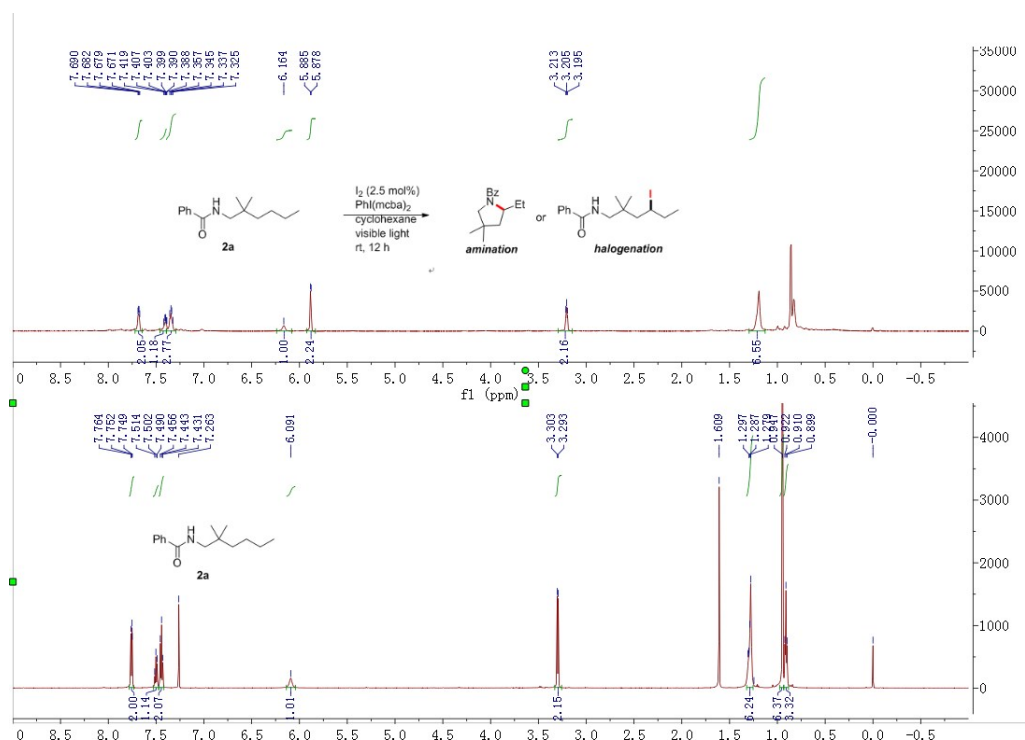

### Nagib:<sup>6</sup>

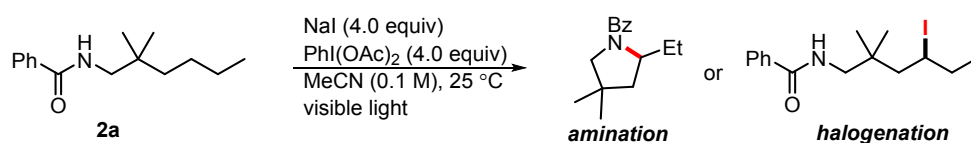

**Procedure:** To an oven-dried vial with a PTFE septa cap, was added a magnetic stir bar, amide **2a** (46.7 mg, 0.20 mmol, 1.0 equiv), iodobenzene diacetate (256 mg, 0.8 mmol, 4.0 equiv), and dry sodium iodide (148.7 mg, 0.8 mmol, 4.0 equiv).<sup>\*</sup> This vial was sealed and sequentially evacuated and backfilled with nitrogen three times. Separately, acetonitrile was degassed using a freeze-pump-thaw technique three times. Acetonitrile (2 mL) was added to the vial and the vial was stirred at 25 °C in oil bath and irradiation with blue LED light for 10 hours. After completion, the reaction mixture was cooled down to room temperature and the solvent was removed under reduced pressure. The result was determined by crude <sup>1</sup>H NMR. 85% of SM was recovered. (We have successfully reproduced the Nagib reaction with sulphoamide under this condition).

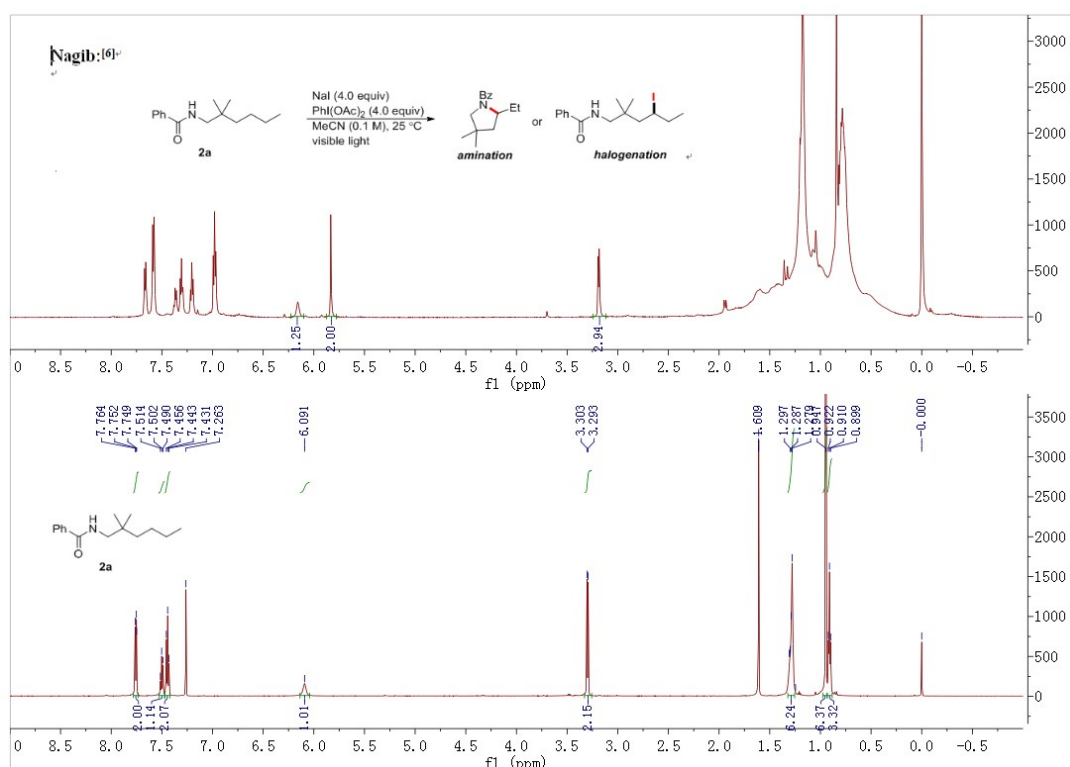

**Yu:<sup>[7]</sup>**

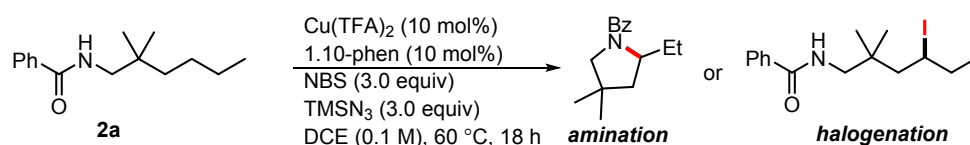

**Procedure:** A Schlenk tube equipped with a stirrer bar is charged with  $\text{Cu}(\text{TFA})_2$  (3.1 mg, 0.01 mmol, 10 mol%), 1,10-Phenanthroline (1.8 mg, 0.01 mmol, 10 mol%), NBS (53.4 mg, 0.3 mmol, 3.0 equiv),  $\text{TMSN}_3$  (37  $\mu\text{L}$ , 0.3 mmol, 3.0 equiv), amide **2a** (23.3 mg, 0.10 mmol, 1.0 equiv) and DCE (1.0 mL) was added sequentially under air. And then tube was sealed with rubber cap. The mixture was stirred at 60 °C for 18 h. After completion, the reaction mixture was cooled down to room temperature and the solvent was removed under reduced pressure. The result was determined by crude  $^1\text{H}$  NMR. 55 % of SM was recovered.

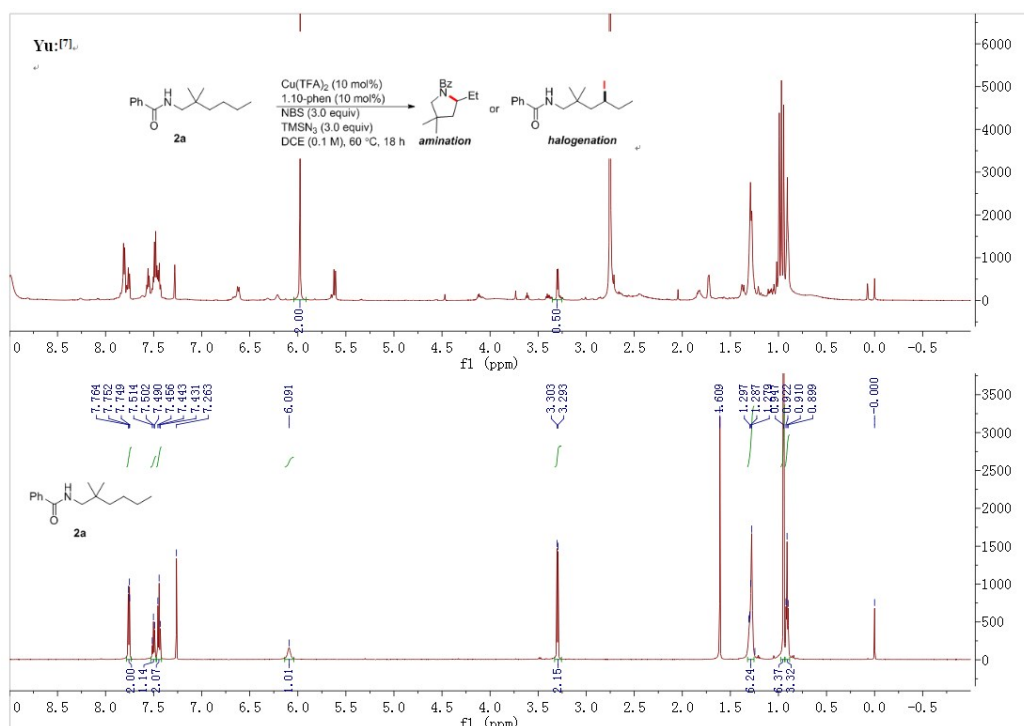

## Mechanism Studies:

### Preparation of 4a:

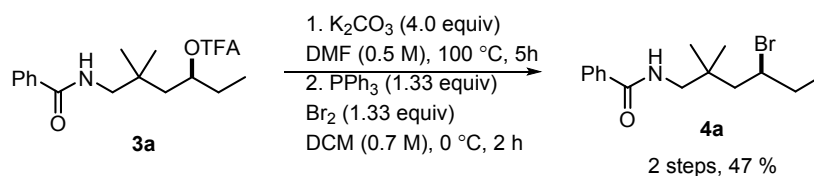

**3a** (138 mg, 0.4 mmol, 1.0 equiv),  $\text{K}_2\text{CO}_3$  (221 mg, 1.6 mmol, 4.0 equiv), DMF (0.5 M) were added to an oven-dried vial, and the mixture was heated at 100 °C for 5 hours. The reaction was diluted with water, extracted with EtOAc and washed with

brine. The combined solvent was dried with  $\text{Na}_2\text{SO}_4$  and concentrated under reduce pressure. The desired residue was purified by flash column chromatography on silica gel (PE:EA:DCM = 5:1:0.5 as eluent) to give the alcohol .

$\text{PPh}_3$  (122 mg, 0.466 mmol, 1.33 equiv) was dissolved in DCM (0.7 M), then cooled to 0 °C, then  $\text{Br}_2$  (74 mg, 0.466 mmol, 1.33 equiv) was added slowly until the solvent turned to yellow solution, the alcohol was added at one time, the desired mixture was stringi 2 hours at that temperature (Detected by TLC). The reaction was diluted with water and sat.  $\text{Na}_2\text{S}_2\text{O}_3$  solution, extracted with DCM. The combined organic solvent was dried with  $\text{Na}_2\text{SO}_4$ , and concentrated under reduce pressure. The desired residue was purified by flash column chromatography on silica gel (PE:EA:DCM = 8:1:0.5 as eluent) to give the **4a**.

***N*-(4-bromo-2,2-dimethylhexyl)benzamide (4a)**

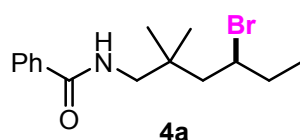

Colourless oil.  $^1\text{H NMR}$  (400 MHz,  $\text{CDCl}_3$ )  $\delta$  7.79 (d,  $J = 7.2$  Hz, 2H), 7.51 (t,  $J = 7.2$  Hz, 1H), 7.45 (dd,  $J = 7.2, 7.2$  Hz, 2H), 6.54 (br s, 1H), 4.08–4.14 (m, 1H), 3.62 (dd,  $J = 13.8, 8.1$  Hz, 1H), 3.25 (dd,  $J = 13.8, 5.4$  Hz, 1H), 2.16 (dd,  $J = 15.9, 8.1$  Hz, 1H), 1.83–1.94 (m, 2H), 1.80 (dd,  $J = 15.9, 2.1$  Hz, 1H), 1.05 (t,  $J = 7.2$  Hz, 3H), 1.04 (s, 3H), 1.01 (s, 3H).  $^{13}\text{C NMR}$  (100 MHz,  $\text{CDCl}_3$ )  $\delta$  167.45, 134.81, 131.42, 128.63, 126.82, 55.11, 48.53, 47.99, 35.44, 34.77, 26.60, 25.08, 12.01. **HRMS–ESI** ( $m/z$ ):  $[\text{M}+\text{Na}]^+$  calcd. for  $\text{C}_{15}\text{H}_{22}\text{BrNNaO}$ , 334.0777; found, 334.0778. **IR** (KBr,  $\text{cm}^{-1}$ ):  $\nu$  3550, 3476, 3414, 1619, 1400, 1117.

### Preparation of **5a**:<sup>8</sup>

The **5a** was prepared as reference 8

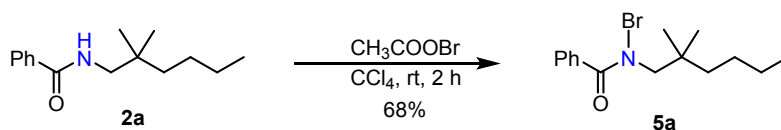

To a 25 mL flame dried, foil wrapped flask under N<sub>2</sub>, amide **2a** (233 mg, 1.0 equiv, 1.0 mmol) was added followed by acetyl hypobromite solution (7.5 mL, 1.47 mmol, 0.20 M) in CCl<sub>4</sub>. The reaction was stirred at room temperature for 1.5 hours. When the reaction was complete as judged by <sup>1</sup>H NMR analysis (1.5 hours usually sufficient) the reaction was concentrated under reduced pressure to give a yellow solid. The desired residue was purified by flash column chromatography on silica gel (PE:Et<sub>2</sub>O = 5:1 as eluent) quickly to give the **5a**.

*General storage: All N-Bromo reagents were stored in foil-wrapped vials in the freezer when not in use.*

**N-bromo-N-(2,2-dimethylhexyl)benzamide (5a)**

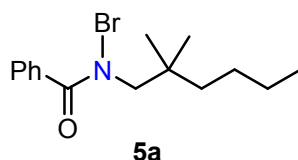

Yellow oil. <sup>1</sup>H NMR (600 MHz, CDCl<sub>3</sub>) δ 7.49 (d, *J* = 6.9 Hz, 2H), 7.38–7.43 (m, 3H), 3.76 (s, 2H), 1.25–1.28 (m, 4H), 1.19–1.23 (m, 2H), 0.96 (s, 6H), 0.88 (t, *J* = 7.1 Hz, 3H). <sup>13</sup>C NMR (150 MHz, CDCl<sub>3</sub>) δ 173.75, 134.97, 130.20, 128.04, 127.66, 65.07, 40.27, 36.79, 25.92, 25.52, 23.45, 14.05. HRMS–ESI (*m/z*): [M+Na]<sup>+</sup> calcd. for C<sub>15</sub>H<sub>22</sub>BrNNaO, 334.0777; found, 334.0767. IR (KBr, cm<sup>-1</sup>): ν 3476, 3414, 1639, 1618, 1121, 1094, 713, 616, 479.

### 1. TEMPO Control Experiments

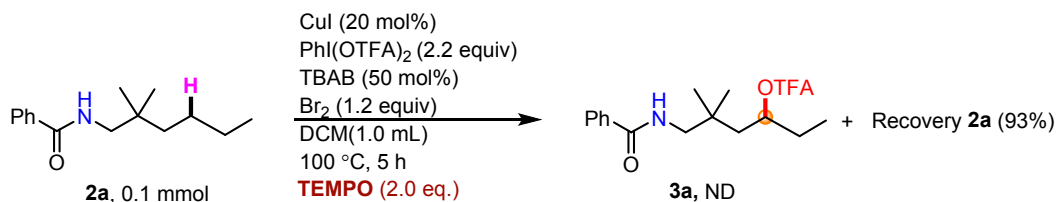

### 2. Radical capture experiments

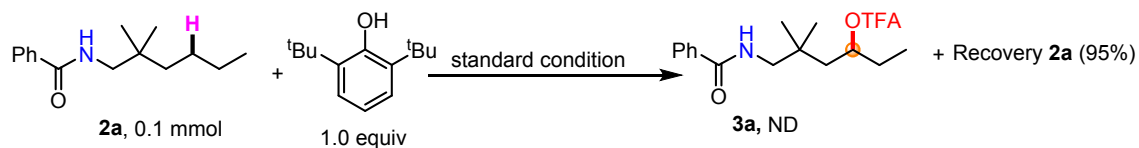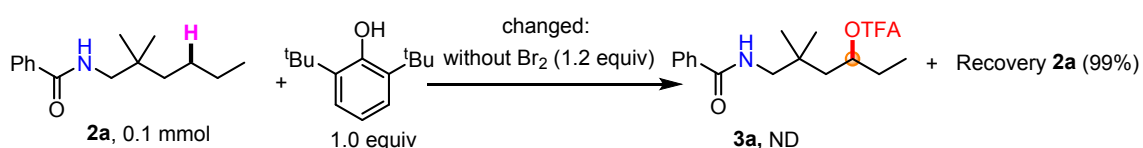

### 3. Competition experiments

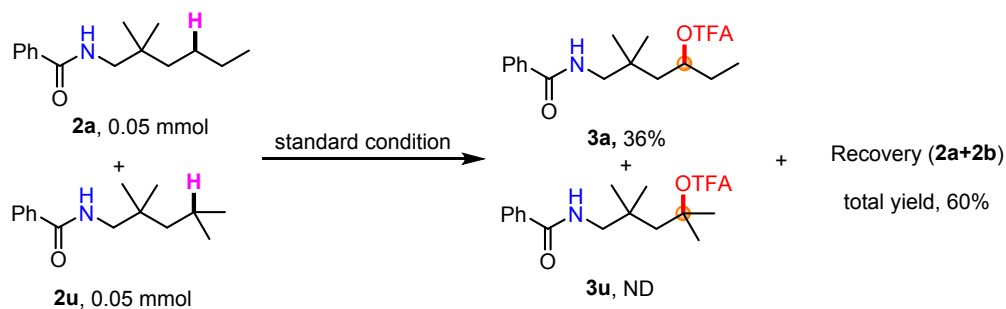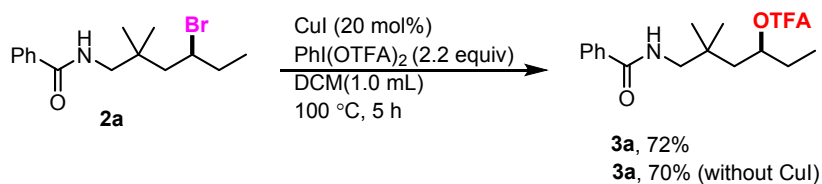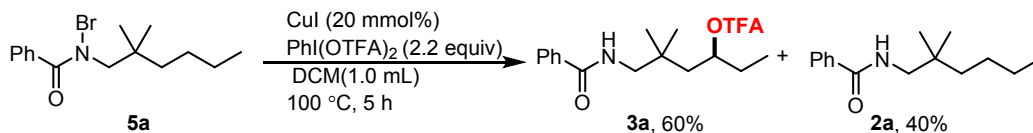

## Results:

1. By adding TEMPO and 2,6-di-*tert*-butylphenol to the reaction mixture independently, the reaction was completely inhibited.

- The intermolecular competition experiment showed that this reaction gave the excellent selectivity on the secondary C–H bond than the tertiary one.
- The compound **4a** can be transferred to the final product, so it maybe the possible intermediate in this reaction.
- The compound **5a** was subjected to the reaction condition of CuI (20 mol%) and PIFA (2.2 equiv) in DCE (1.0 mL) at 100 °C, 60% trifluoroacetoxylation product **3a** was observed and 40% of protonation product **2a** was observed.

### Proposed Mechanism:

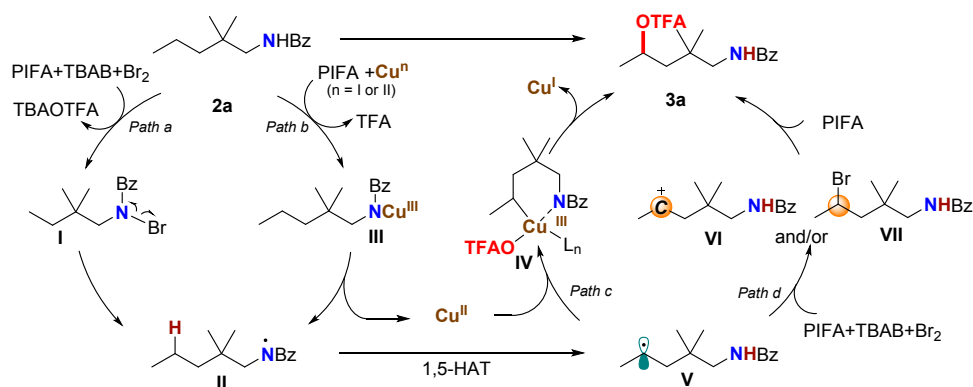

We propose that this transformation is preferred to a single-electron-oxidation process (Scheme 3). With the assistance of PhI(OTFA)<sub>2</sub> and copper catalyst, the N-Br intermediate **I** (path a) or Cu(III)-amidate intermediate **III** (path b) can be generated.<sup>17</sup> Subsequent homolysis of the N-Br or N-Cu bond afforded amidinyl radical **II**. This was followed by a 1,5-H radical shift to give the corresponding C-radical **V**, which resulted in the selective C–H bond trifluoroacetoxylation at  $\delta$  position. For the next step, two possible pathways could be followed: one is the oxidative addition of a carbon radical by a Cu(II) catalyst to generate Cu(III)-amide intermediate **IV**, and after ligand exchange and reductive elimination to afford the trifluoroacetoxylation product **3a** (path c). The other is the oxidation of carbon radical to carbocation (**VI**) which is captured by OTFA<sup>-</sup>, to directly give product (path d). Although we didn't detect any  $\delta$ -brominated product (**VII**) even with decreased PIFA

or shorter reaction time, the possibility that the product is formed through a substitution reaction of intermediate VII cannot be ruled out.

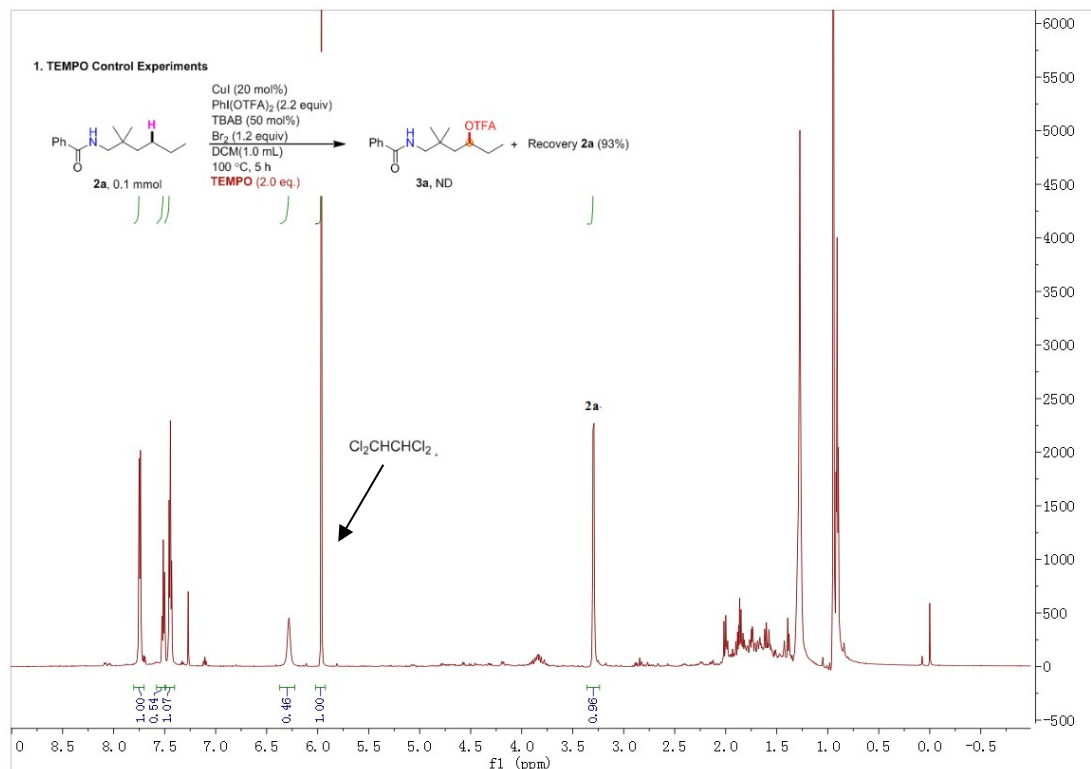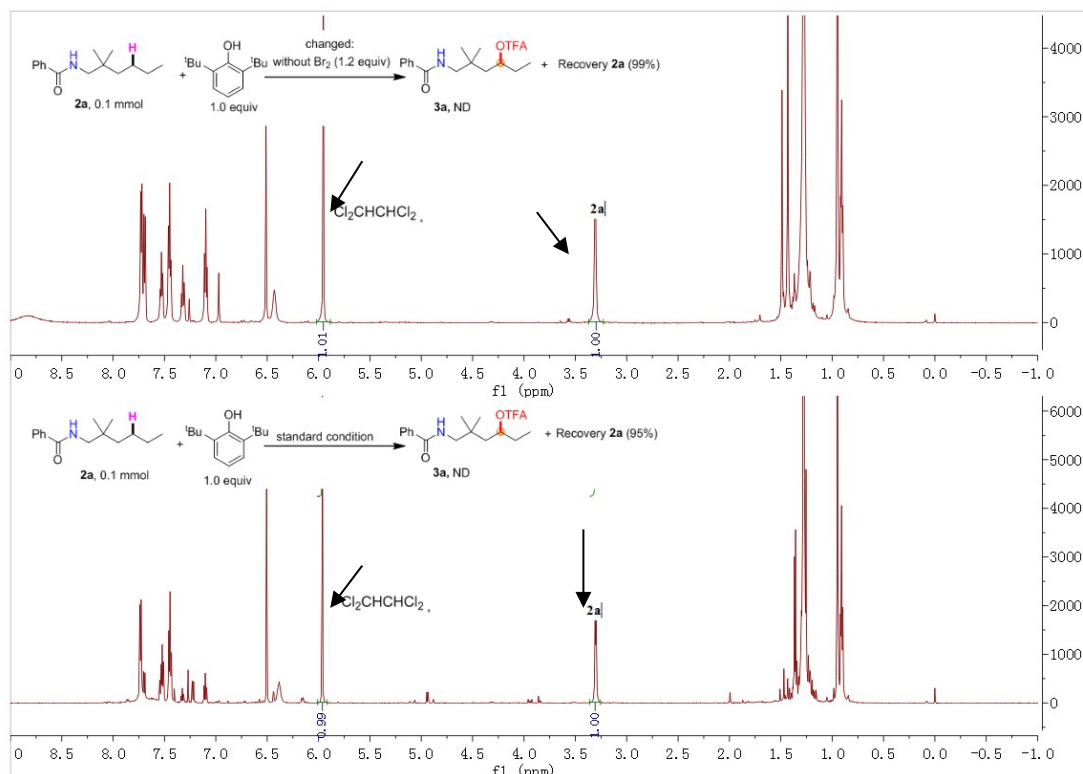



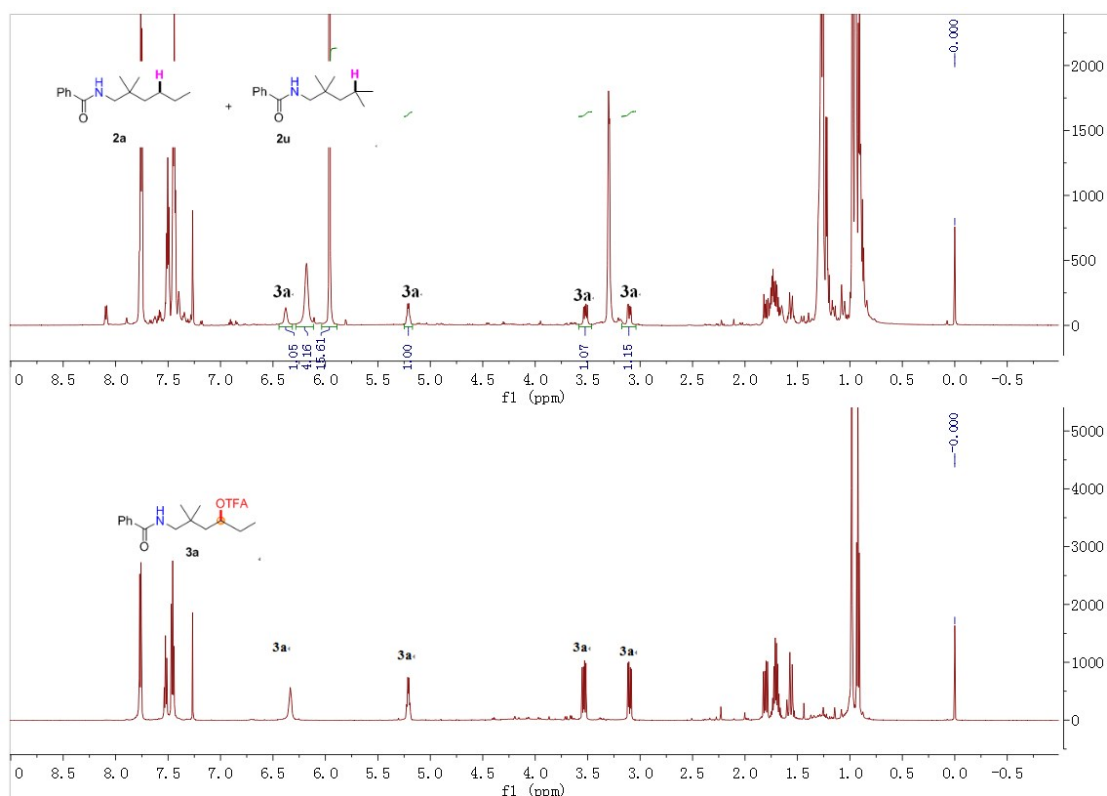

## References

- (1) D. Meng, Y. Tang, J. Wei, X. Shi and M. Yang, *Chem. Commun.*, 2017, **53**, 5744.
- (2) (a) M. J. O'Donnell and R. L. Polt, *J. Org. Chem.*, 1982, **47**, 2663; (b) M. M. Hansen, C. F. Bertsch, A. R. Harkness, B. E. Huff, D. R. Hutchison, V. V. Khau, M. E. LeTourneau, M. J. Martinelli, J. W. Misner, B. C. Peterson, J. A. Rieck, K. A. Sullivan and I. G. Wright, *J. Org. Chem.*, 1998, **63**, 775; (c) M. Yang, X. Jiang and Shi, *Z.-J. Org. Chem. Front.*, 2015, **2**, 51.
- (3) A. Kolocouris, C. Tzitzoglaki, F. B. Johnson, R. Zell, A. K. Wright, T. A. Cross, I. Ian Tietjen, D. Fedida and D. D. Busath, *J. Med. Chem.*, 2014, **57**, 4629.
- (4) C. Betancor, J. I. Concepcion, R. Hernandez, J. A. Salazar and E. Suárez, *J. Org. Chem.*, 1983, **48**, 4430.
- (5) C. Martínez and K. Muñoz, *Angew. Chem., Int. Ed.*, 2015, **54**, 8287.
- (6) E. A. Wappes, S. C. Fosu, T. C. Chopko and D. A. Nagib, *Angew. Chem., Int. Ed.*, 2016, **55**, 9974.
- (7) T. Liu, M. C. Myers and J.-Q. Yu, *Angew. Chem. Int. Ed.*, 2017, **56**, 306.
- (8) V. A. Schmidt, R. K. Quinn, A. T. Brusoe and E. J. Alexanian, *J. Am. Chem. Soc.*, 2014, **136**, 14389.

# NMR Spectra

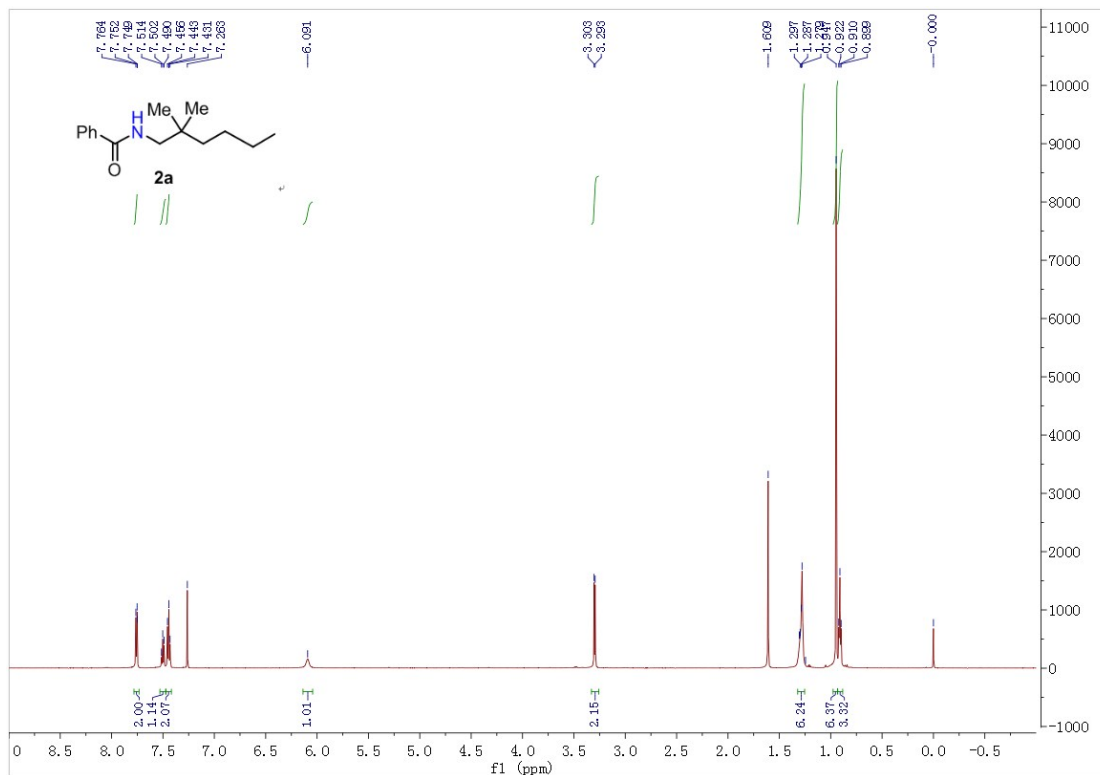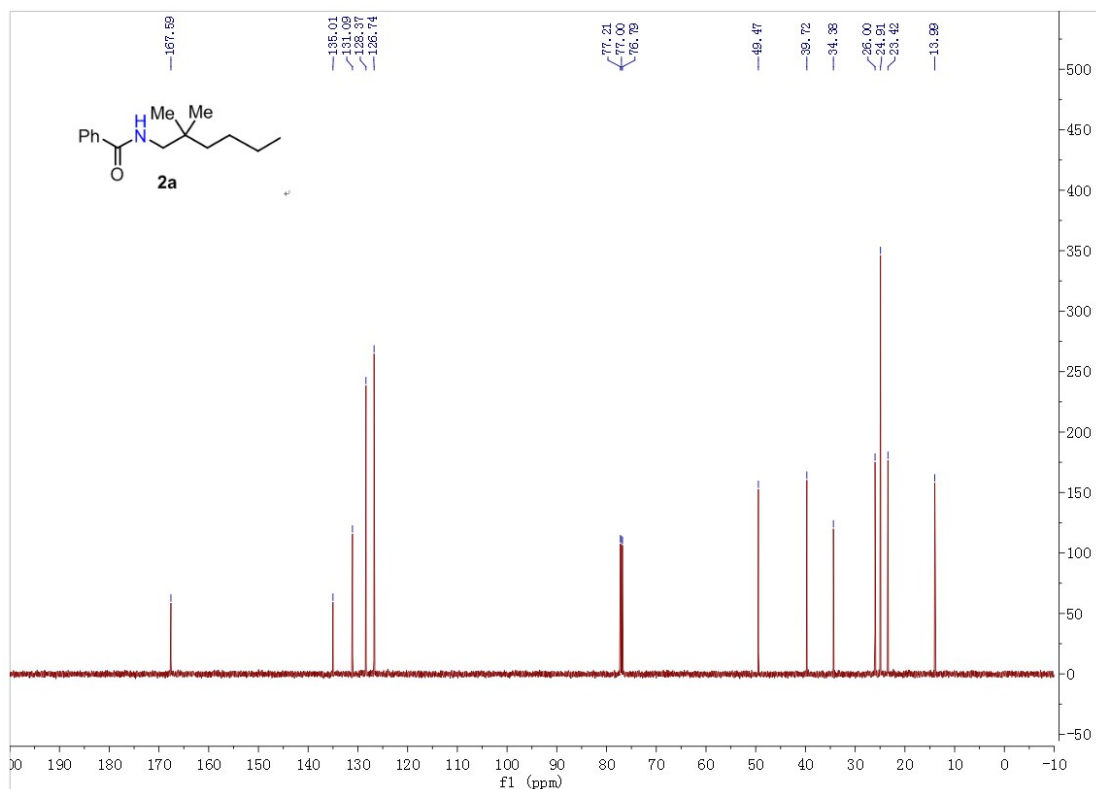

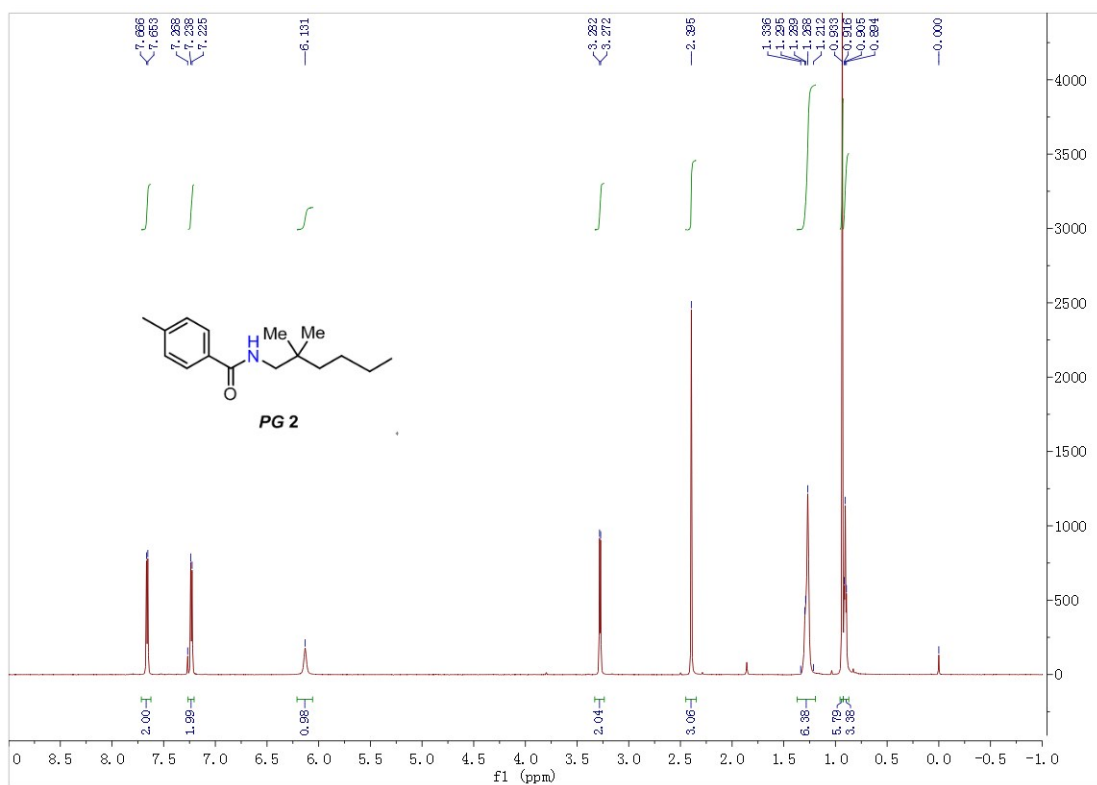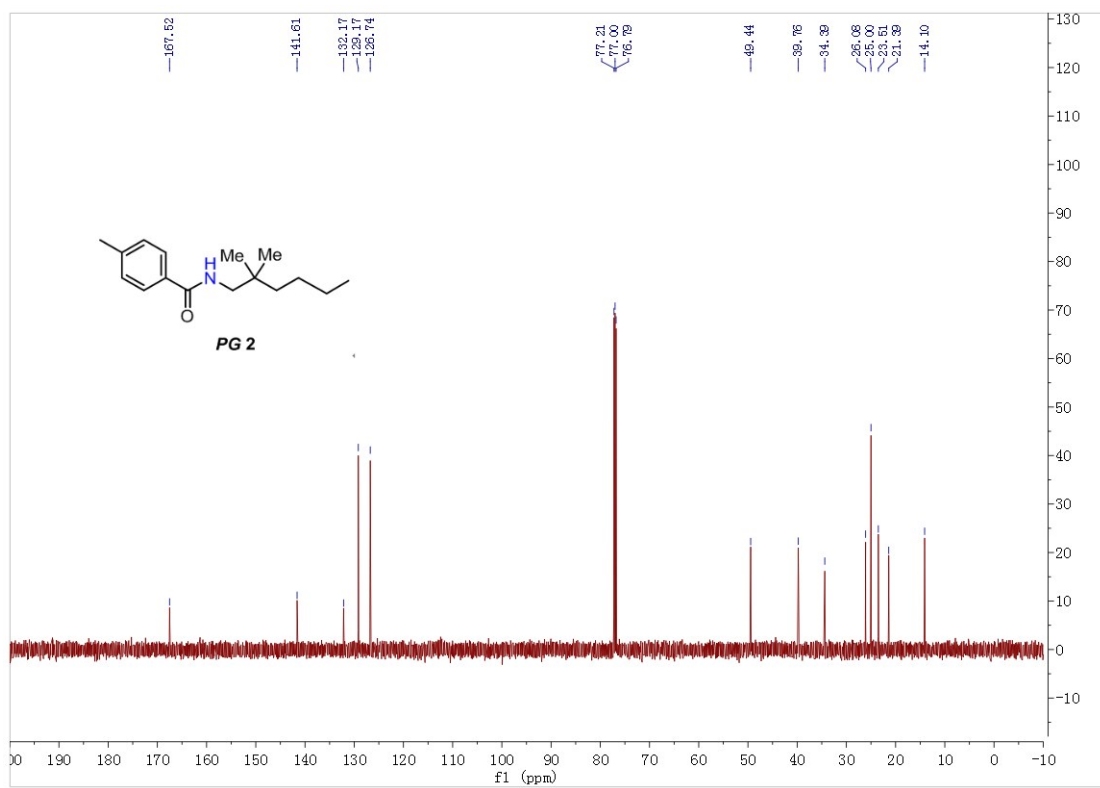

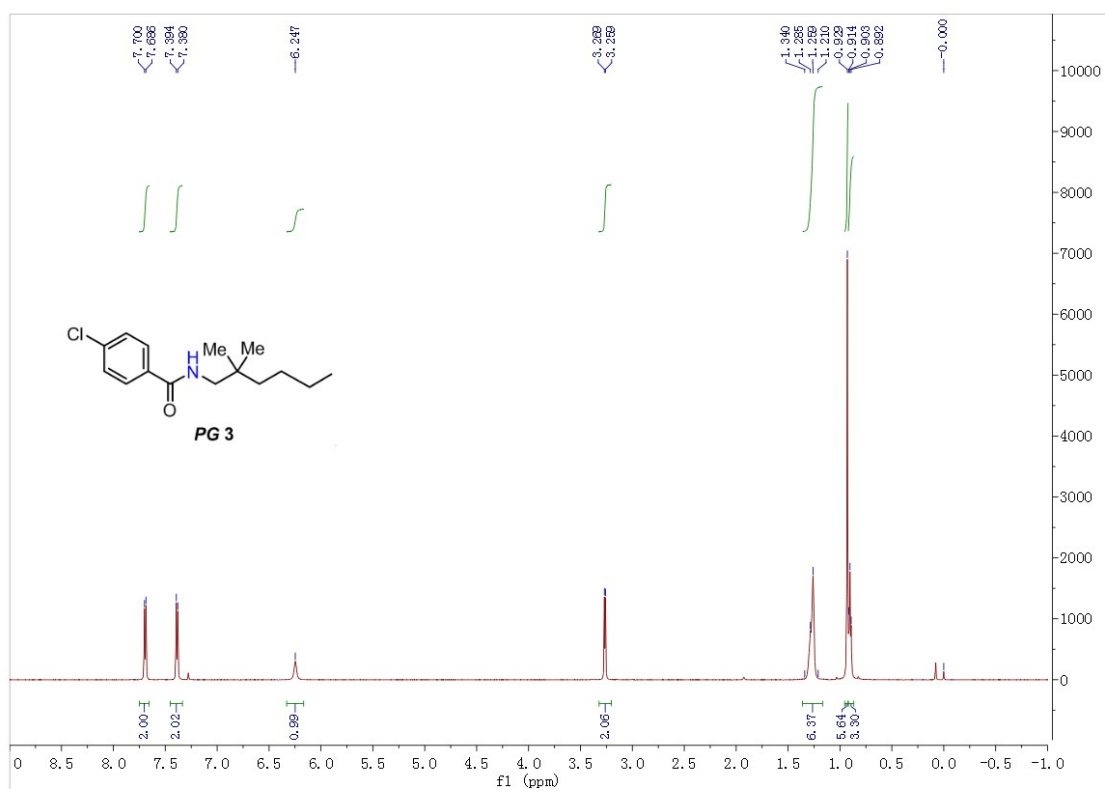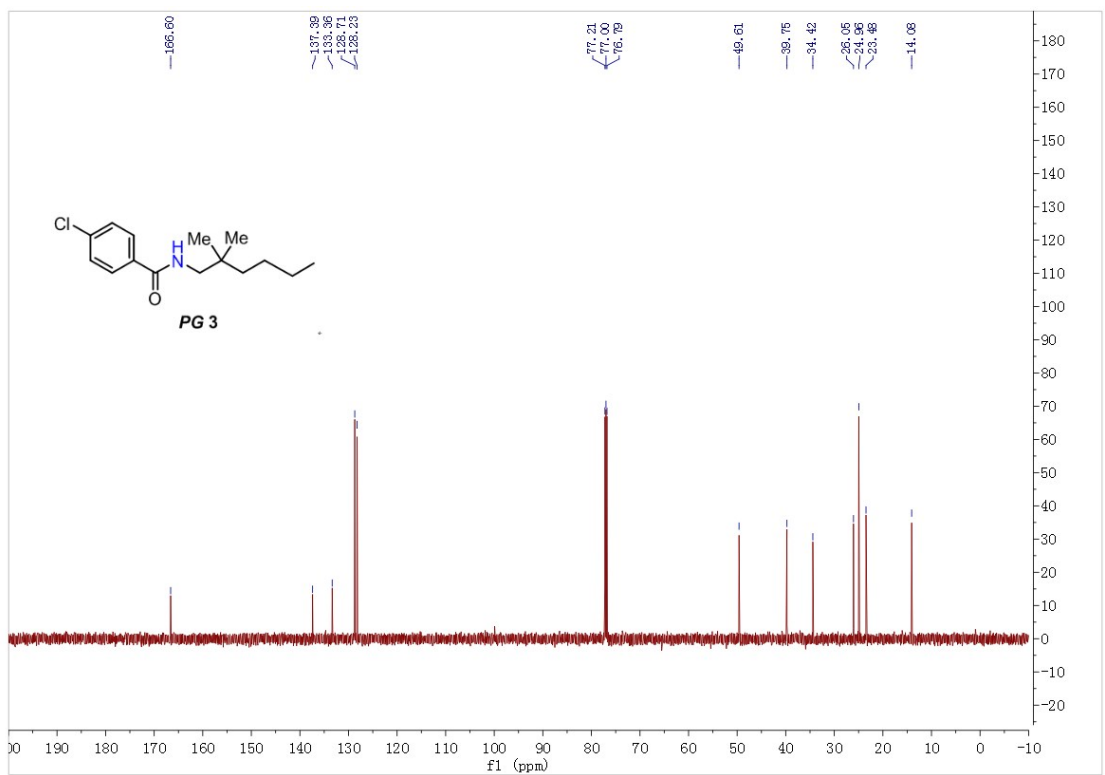

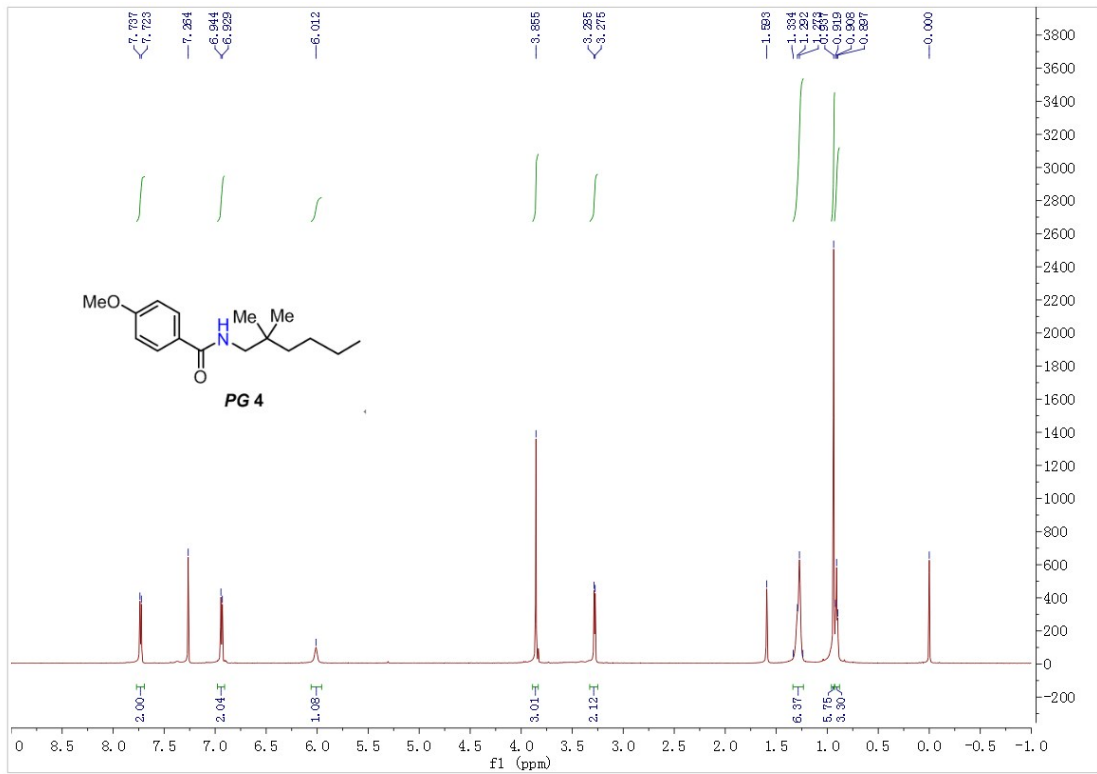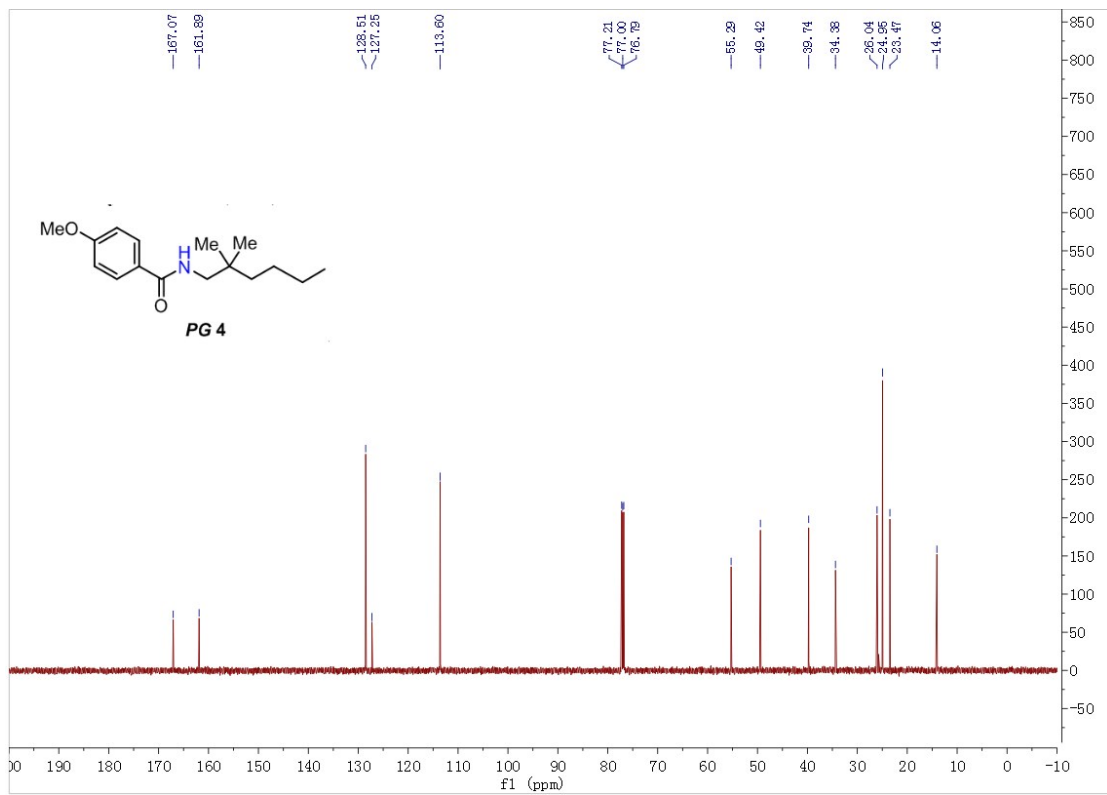

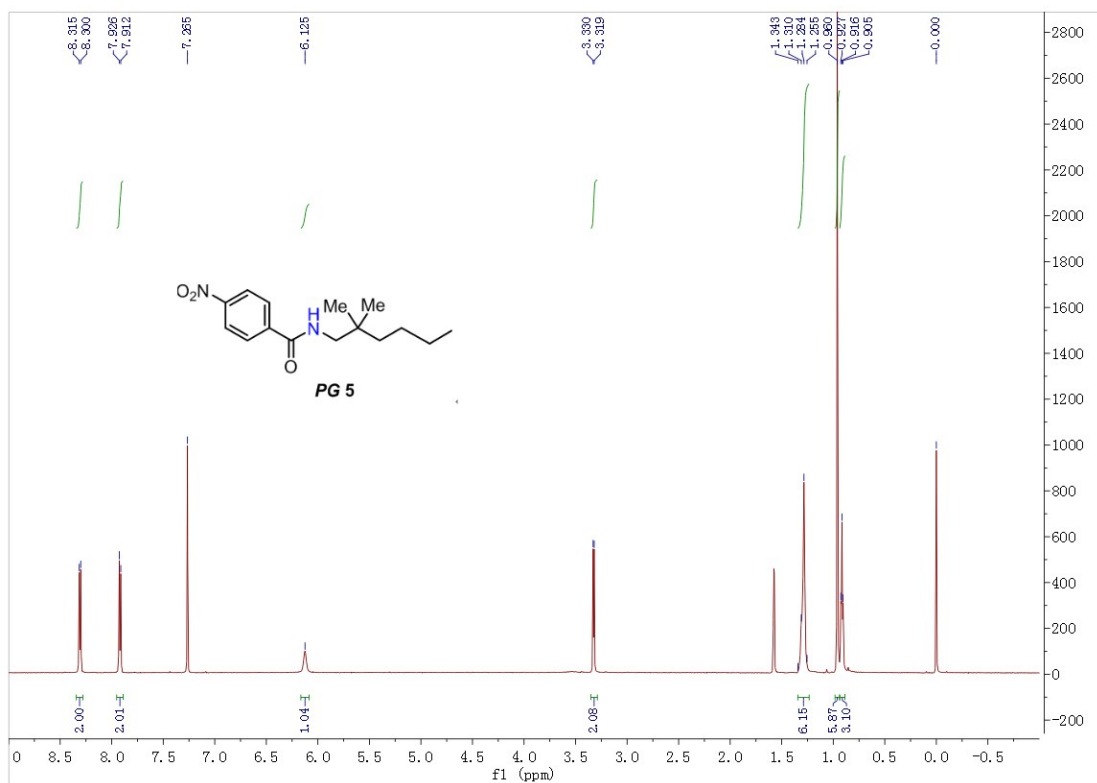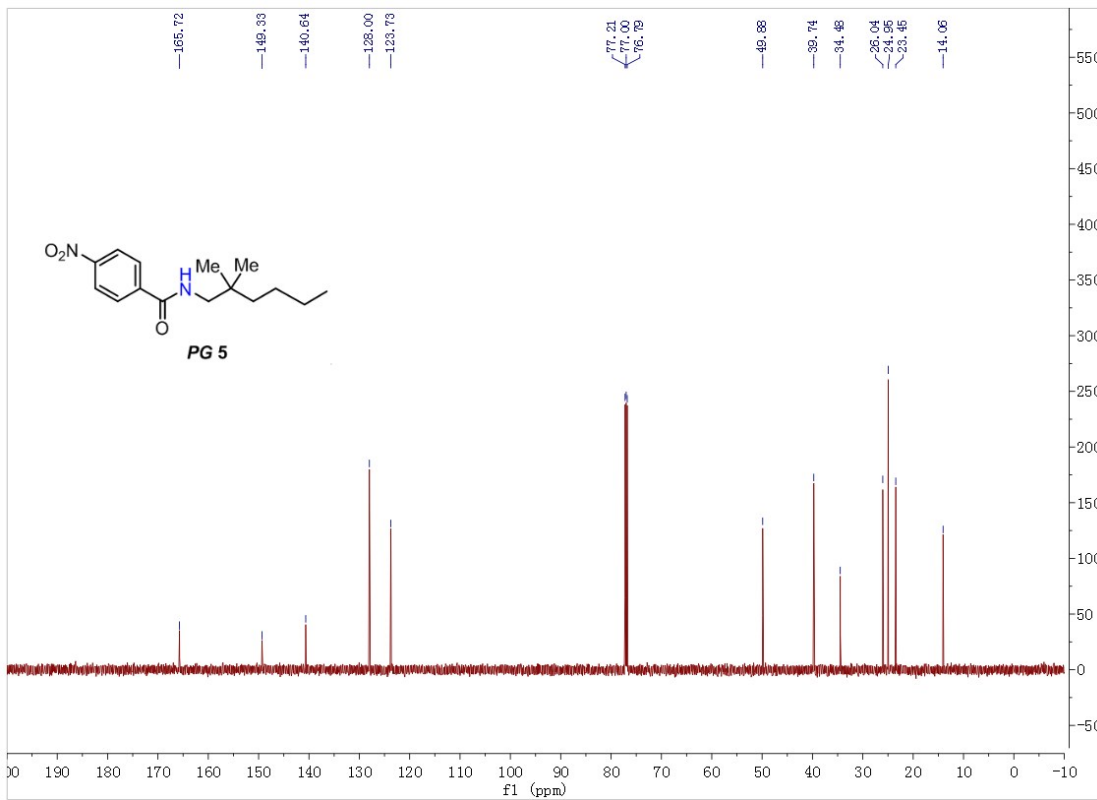

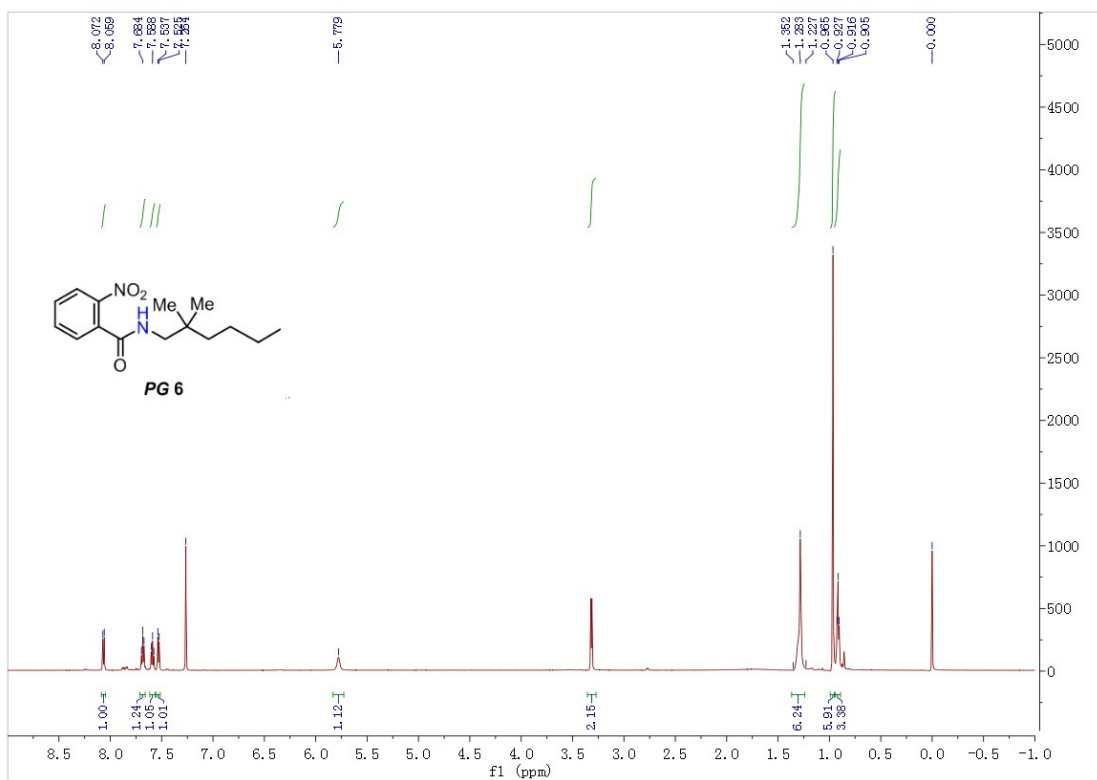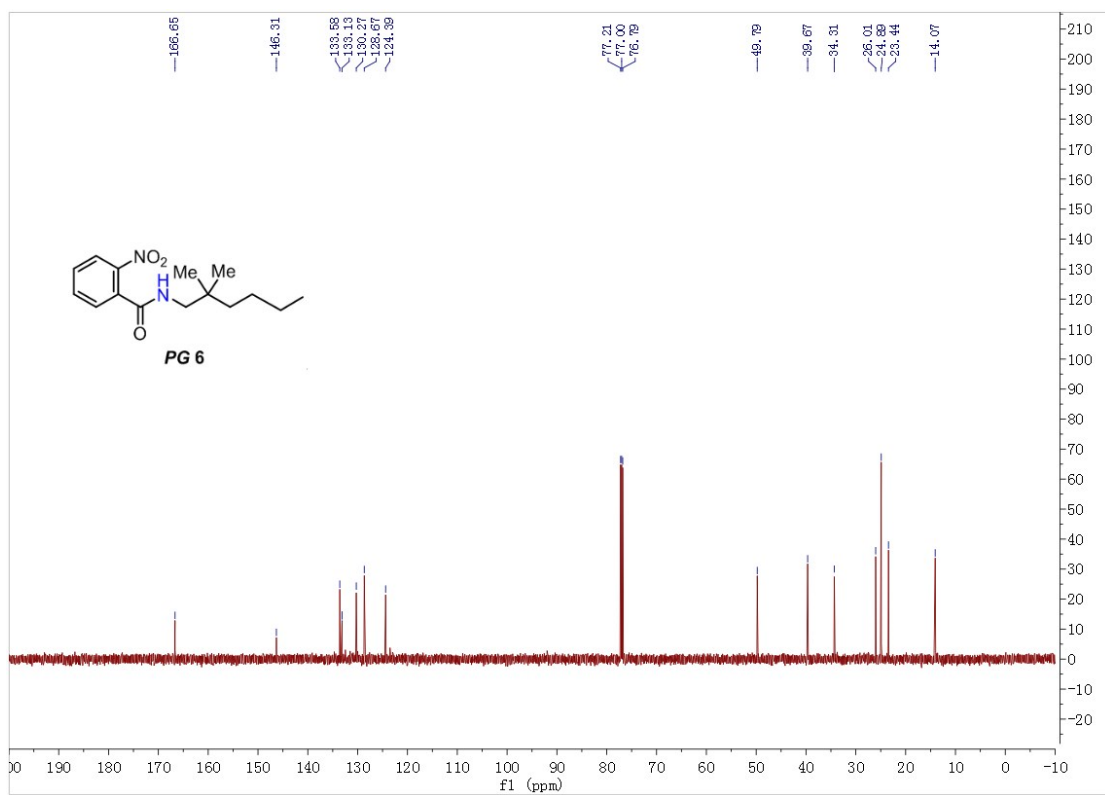

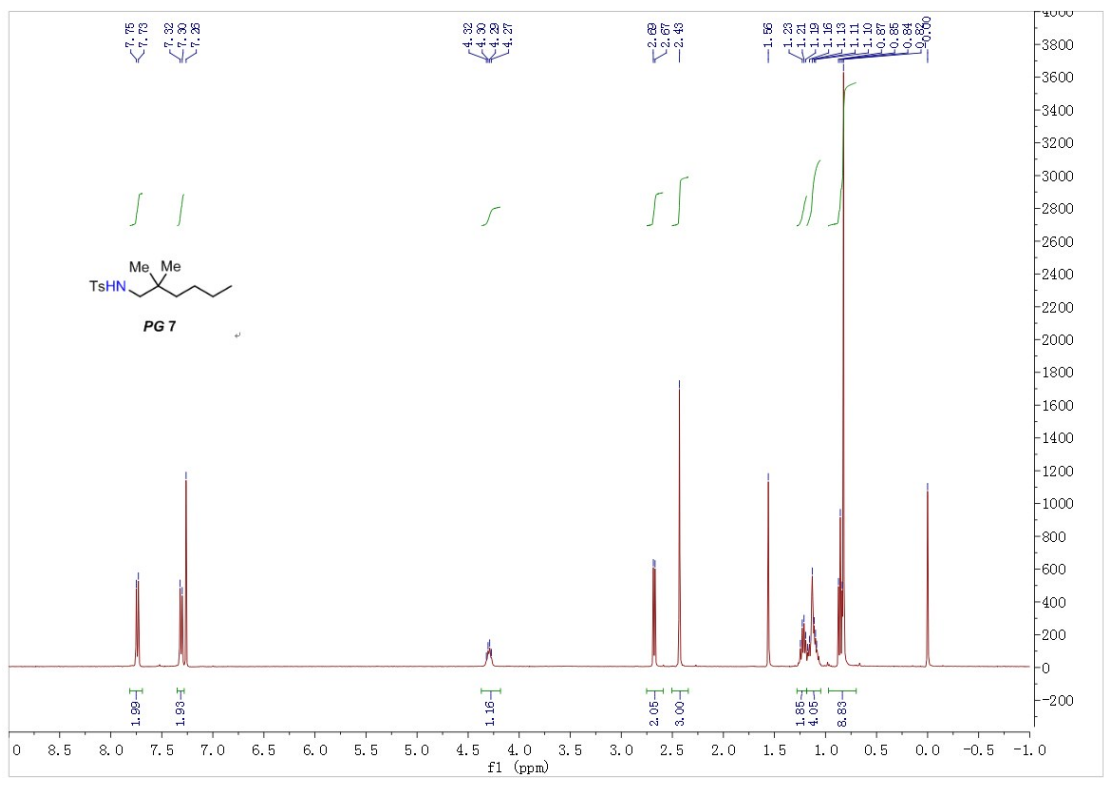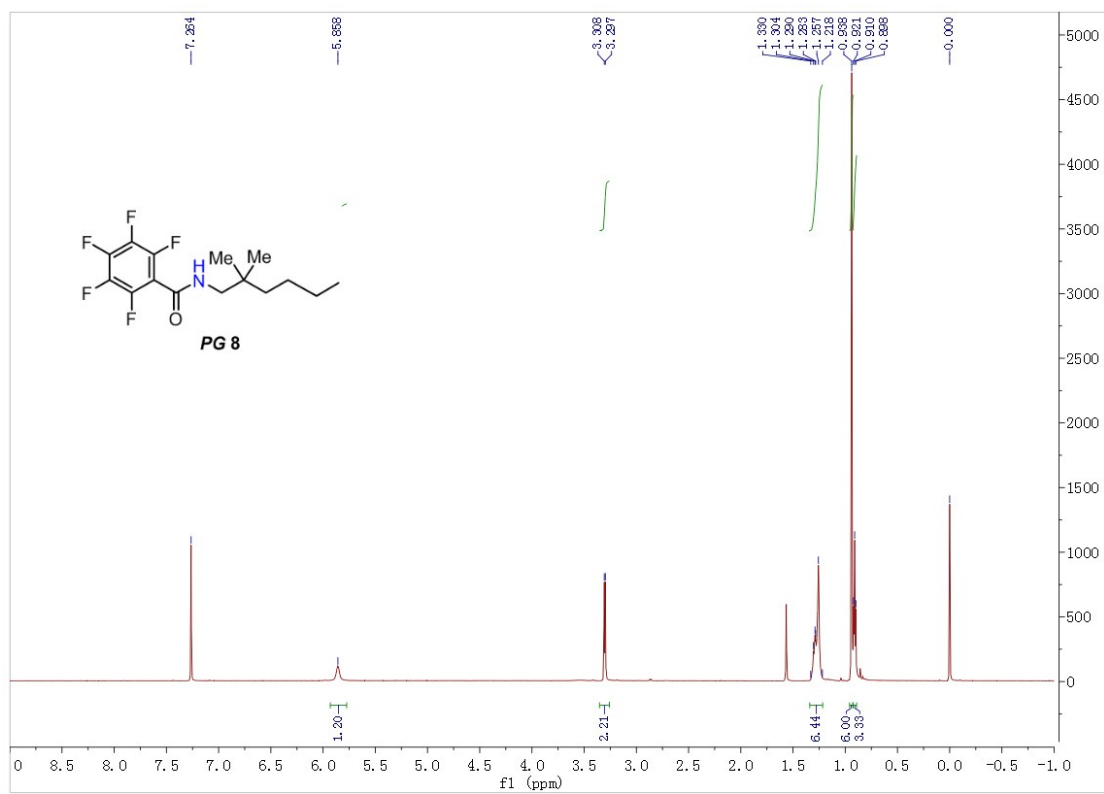



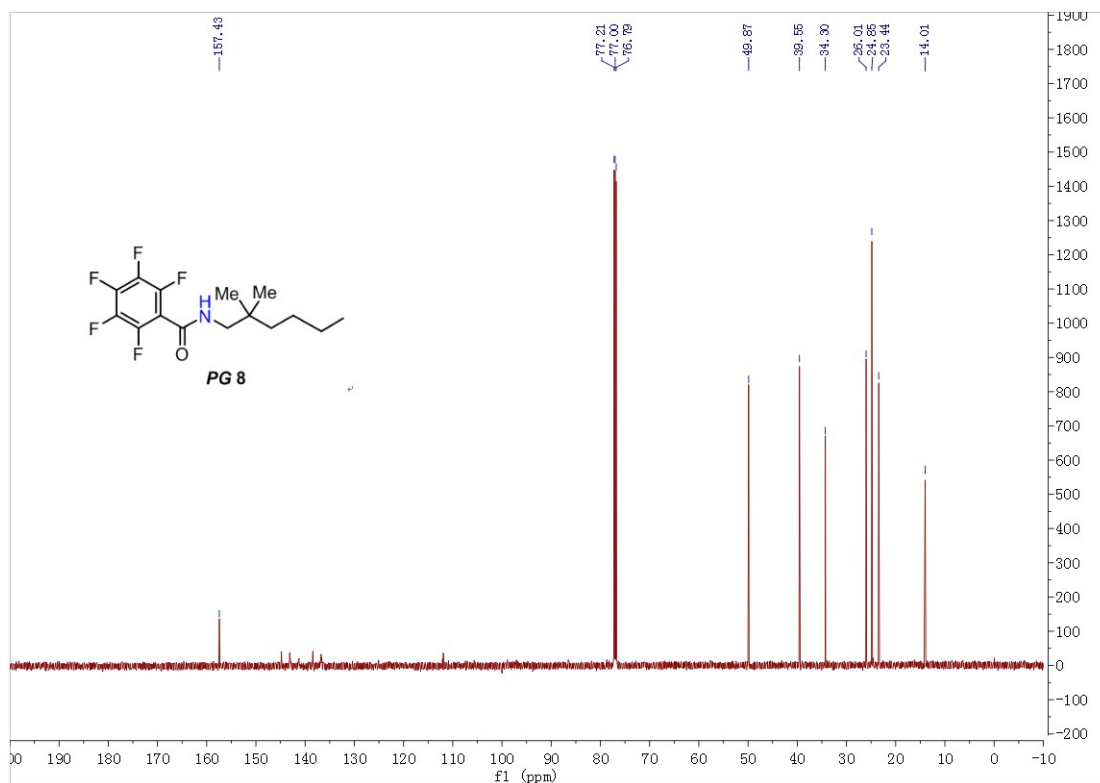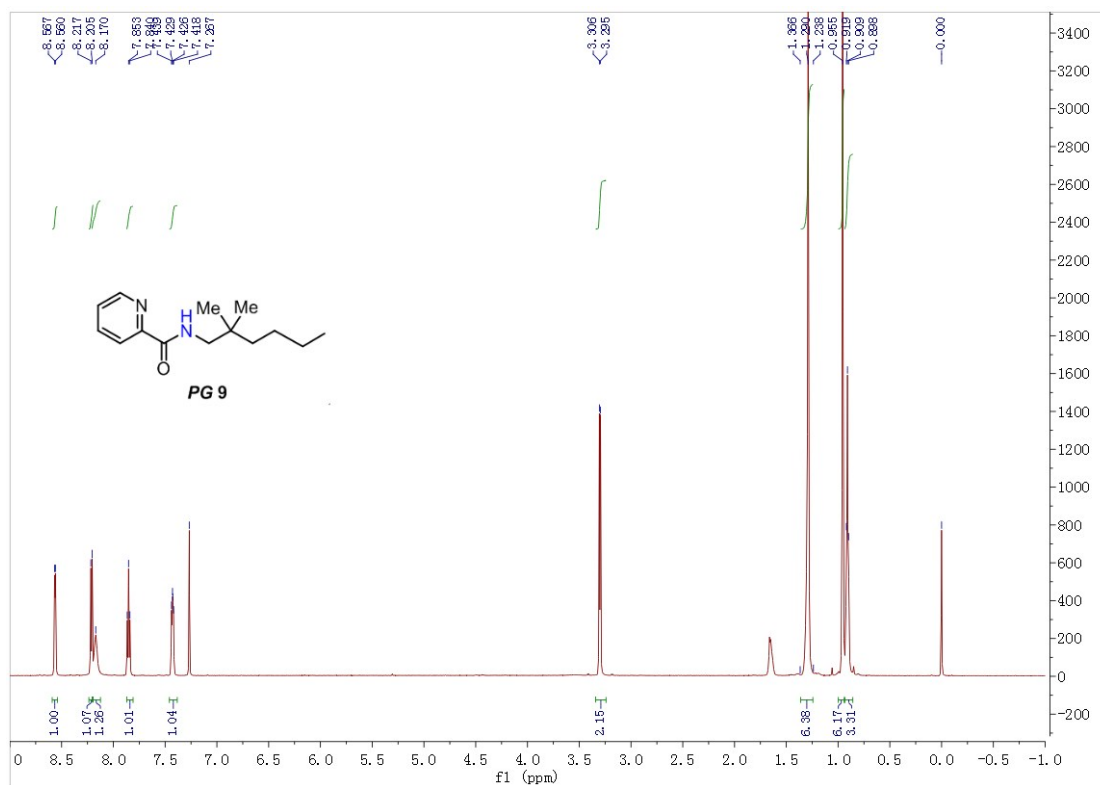

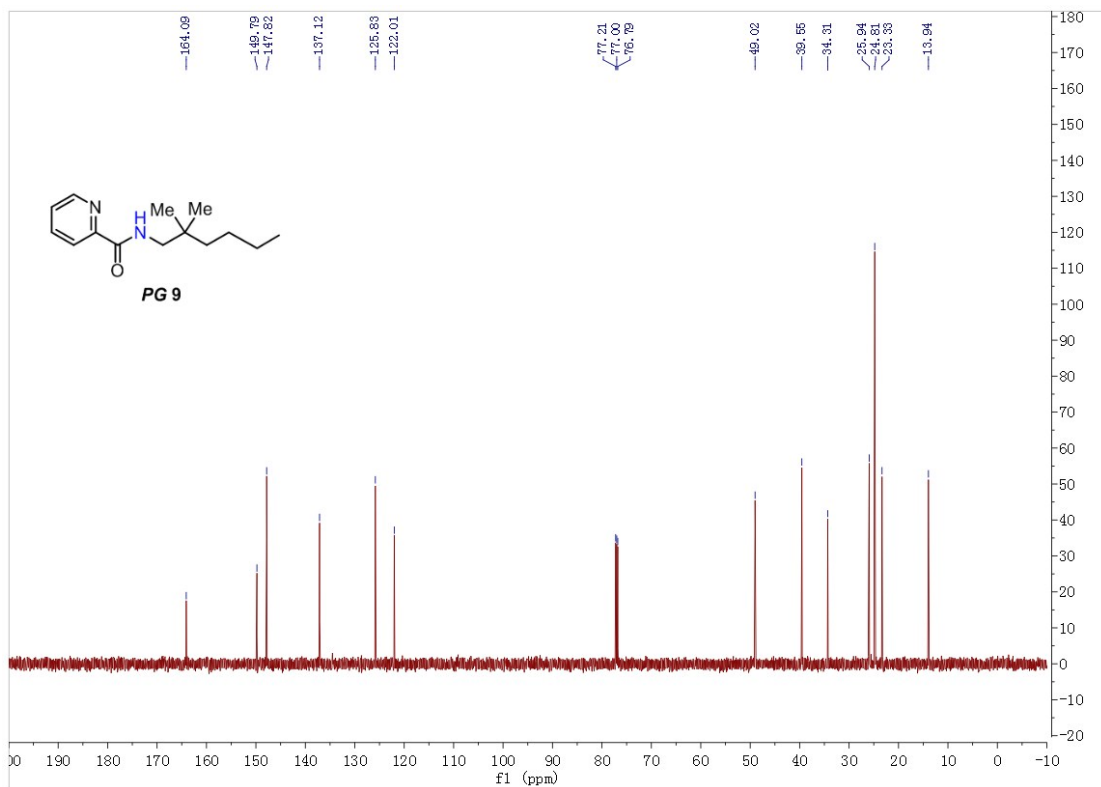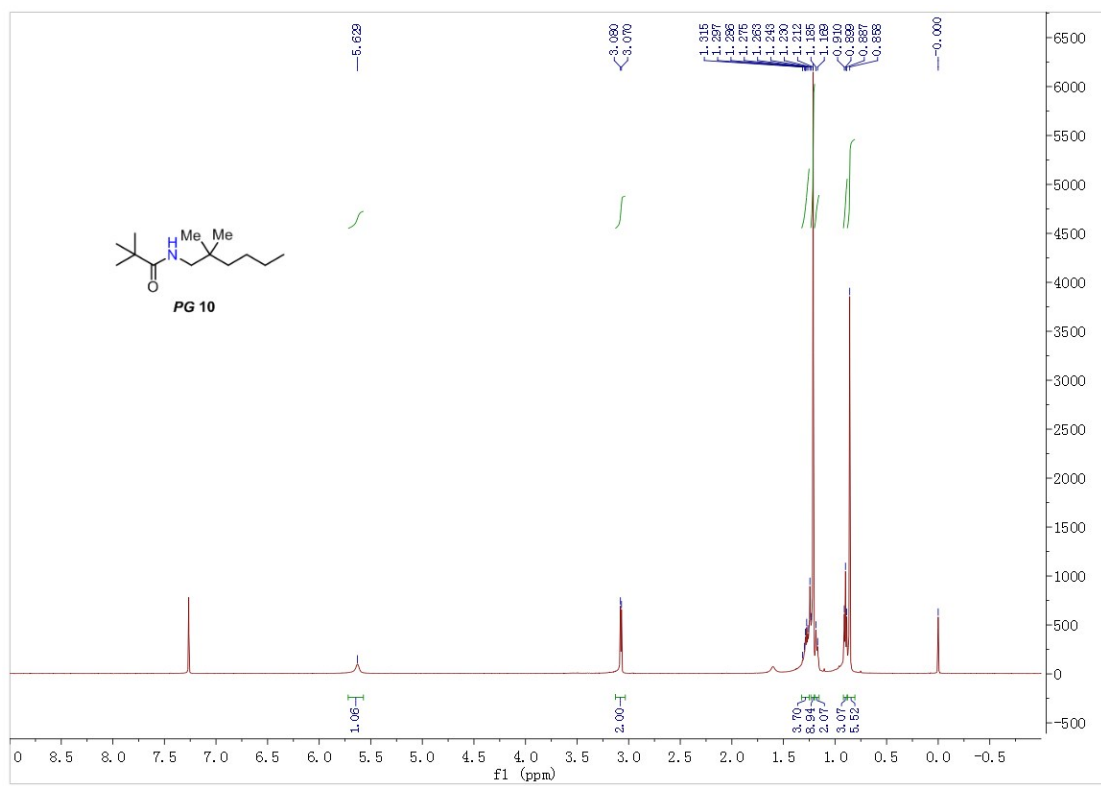

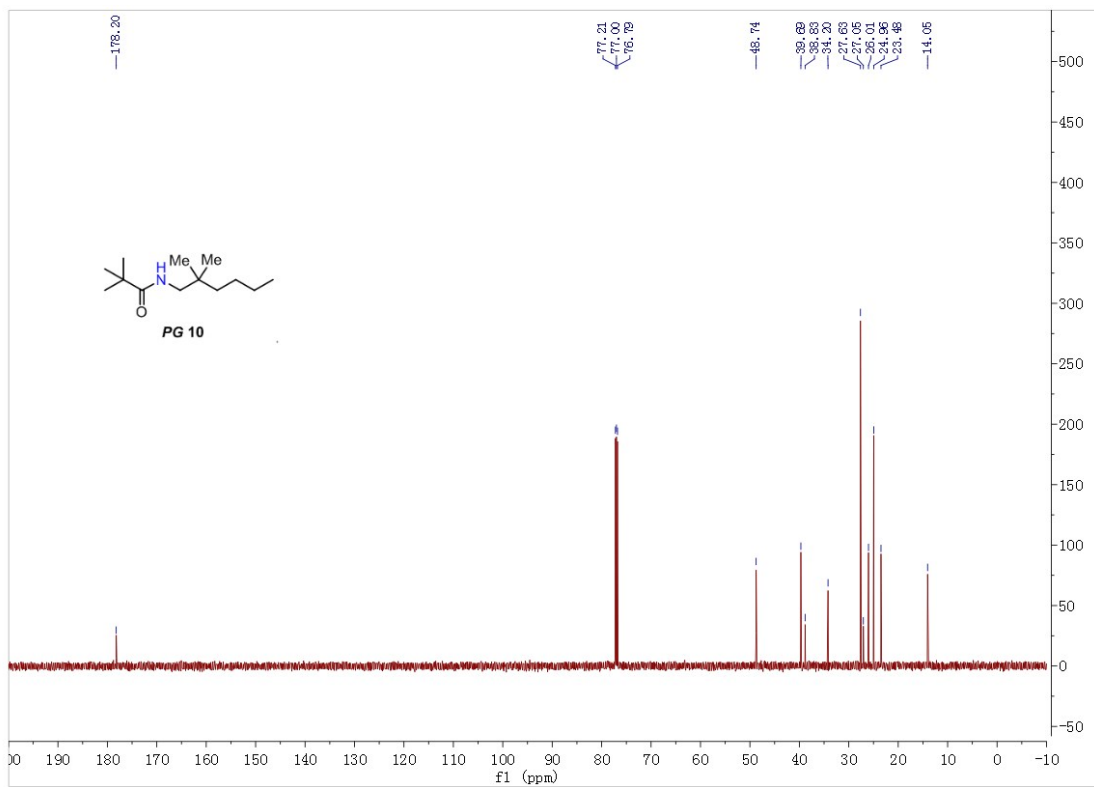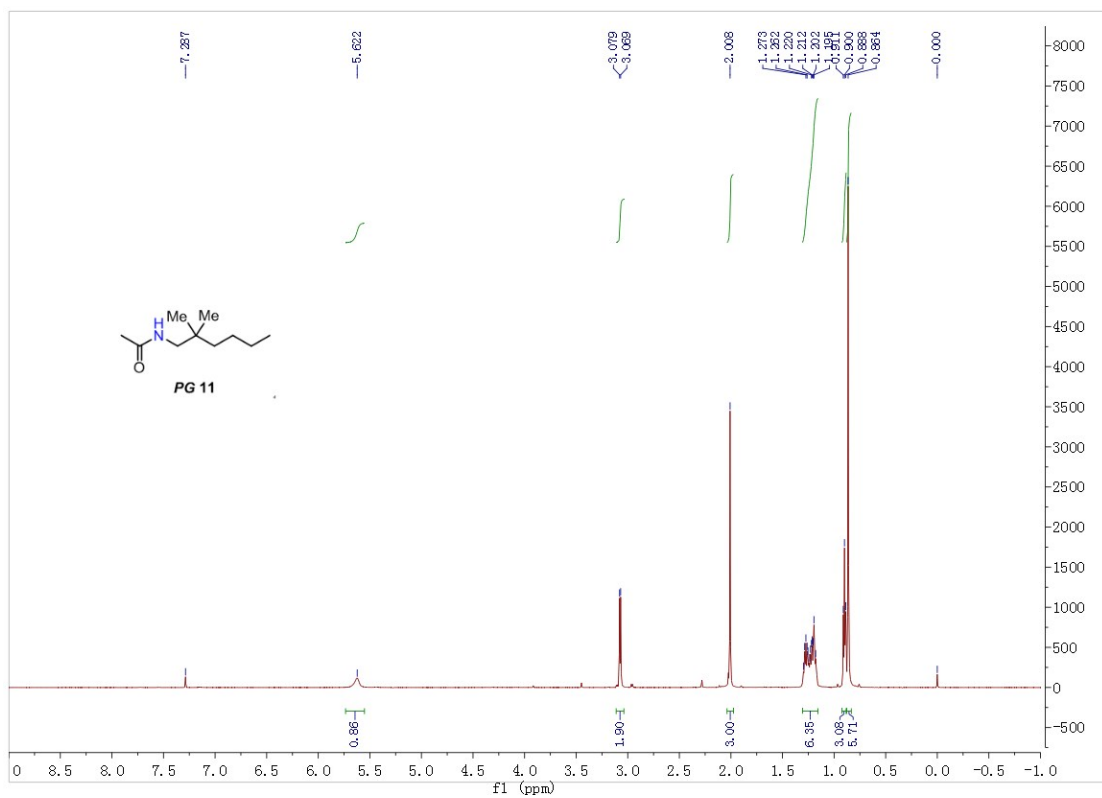

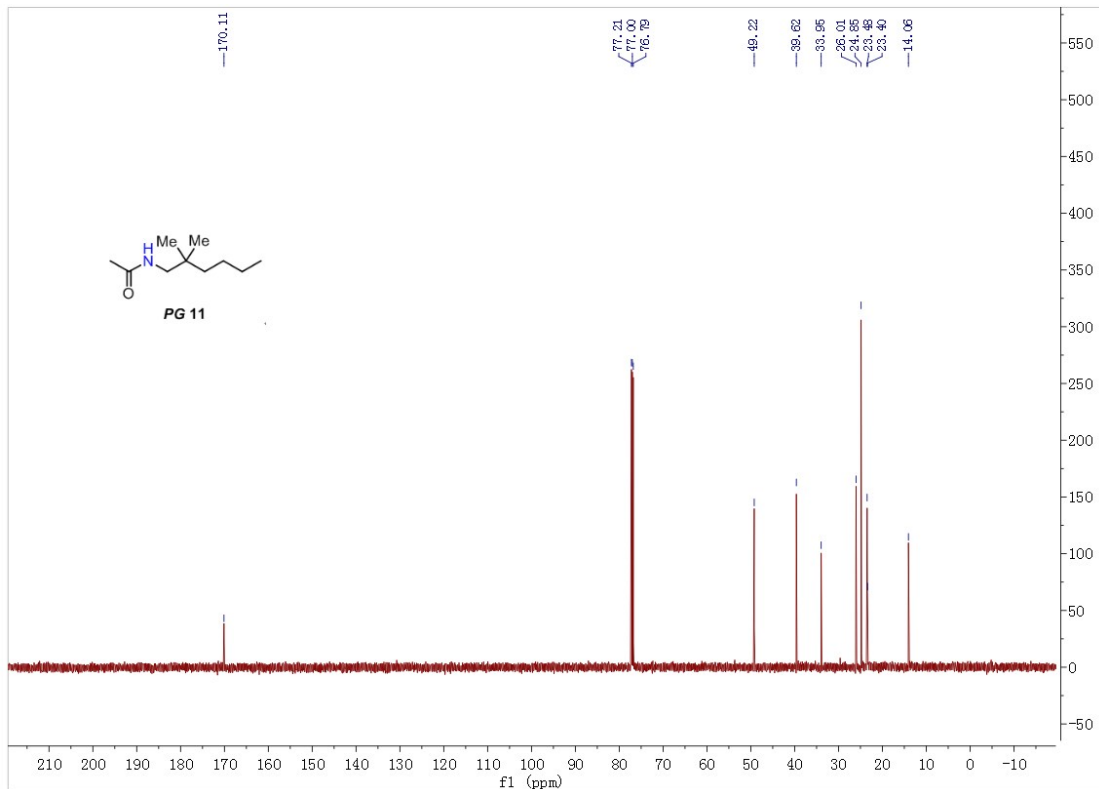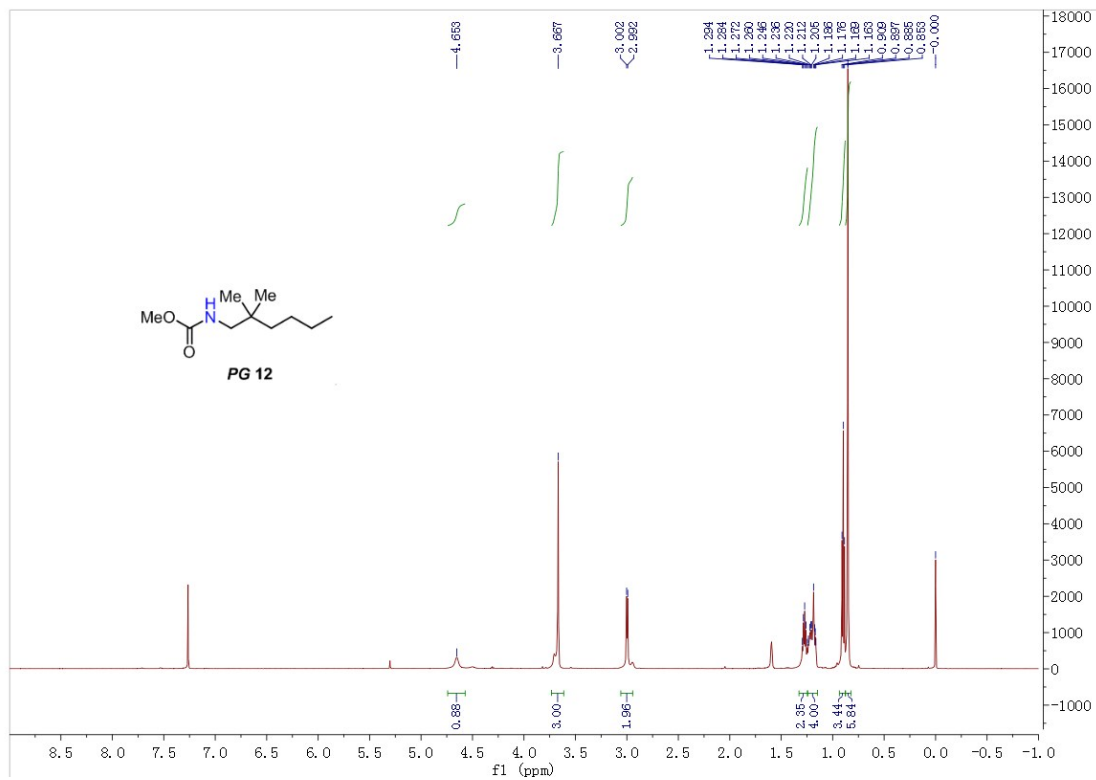

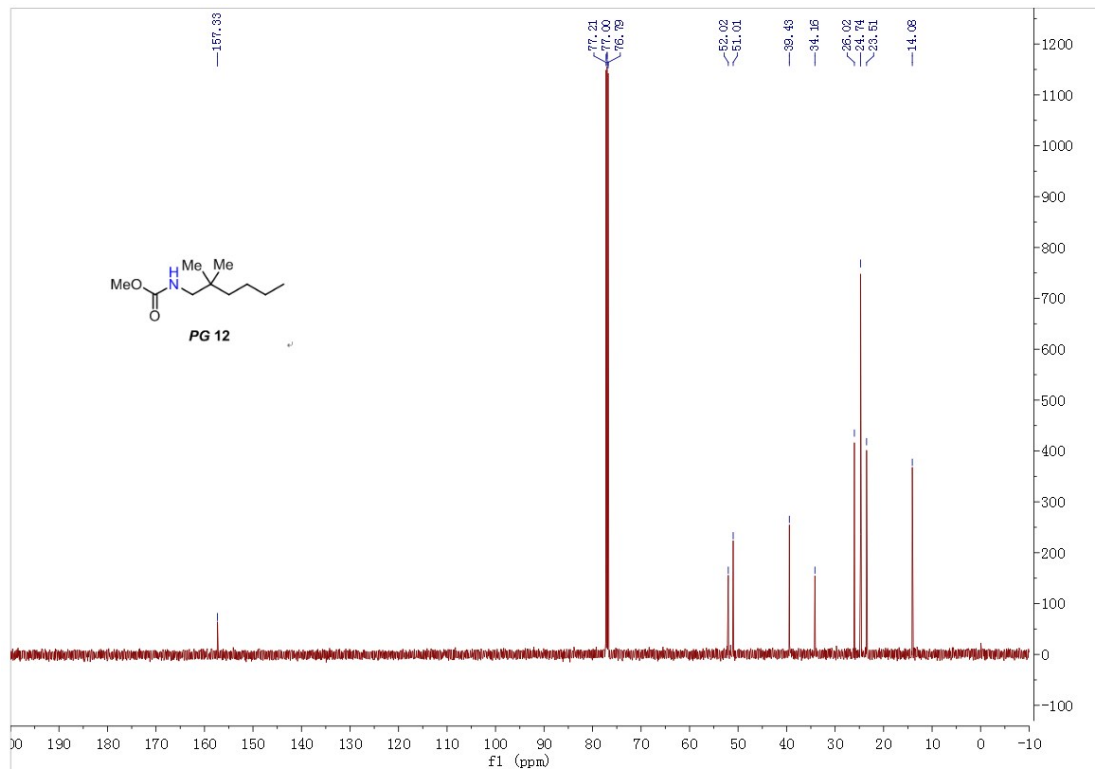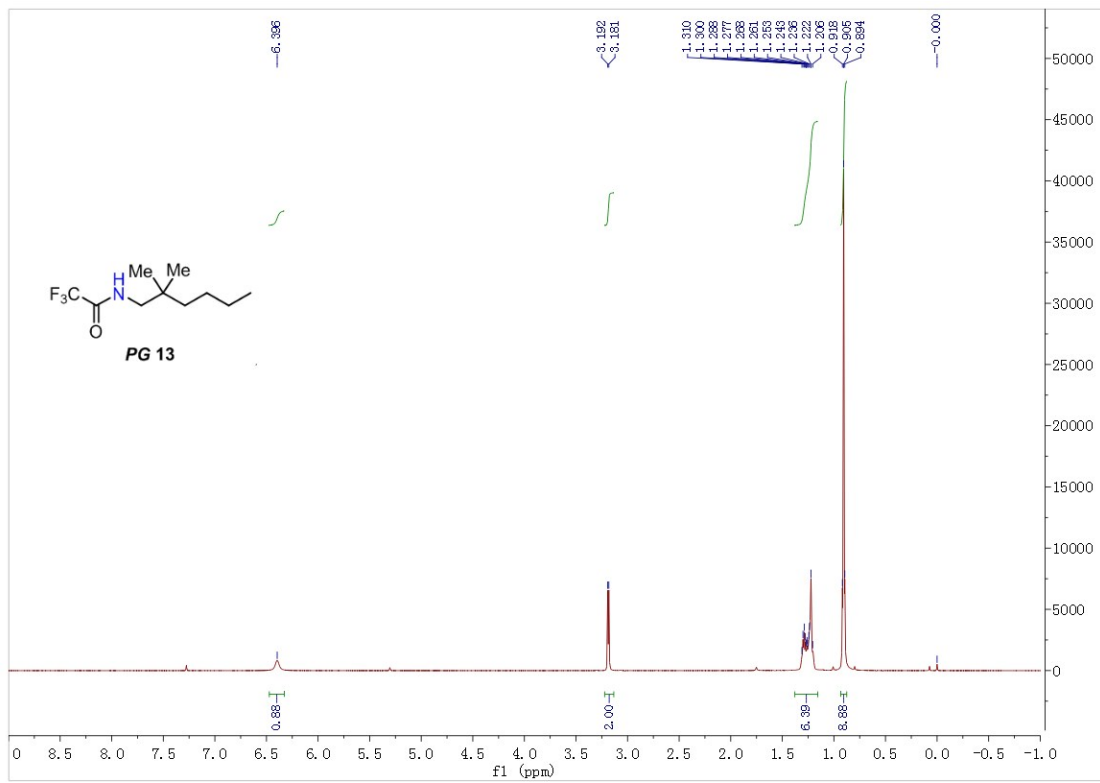

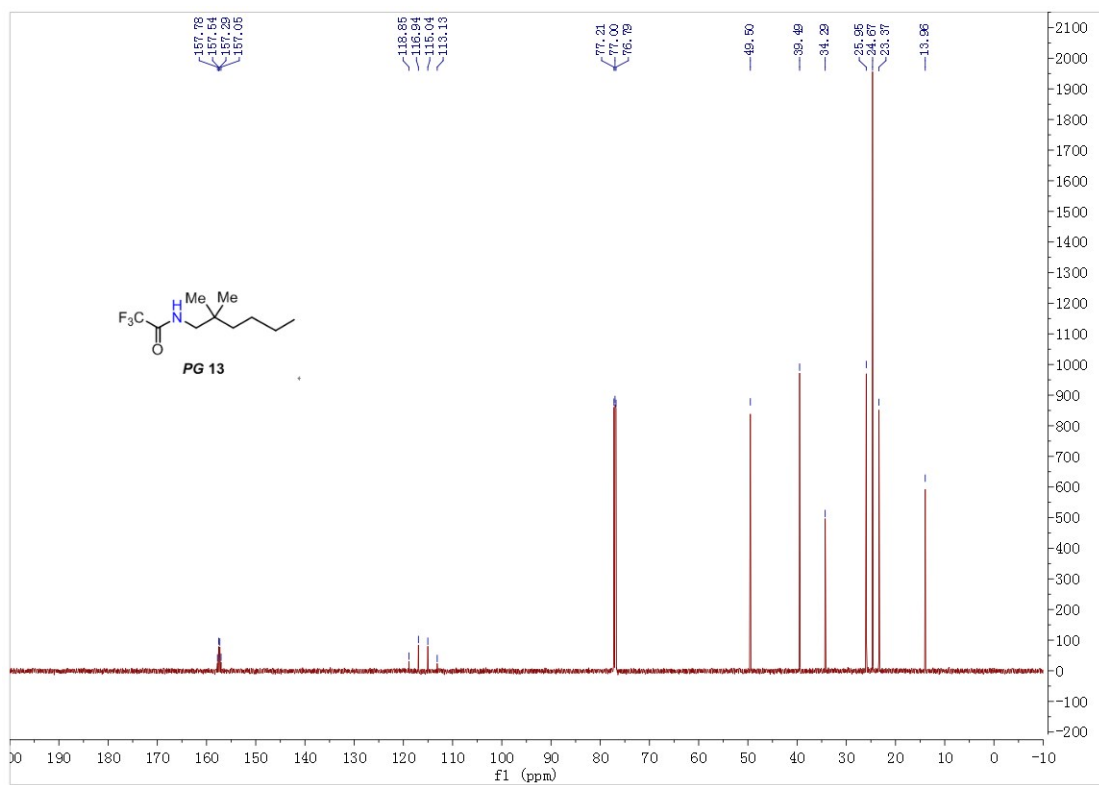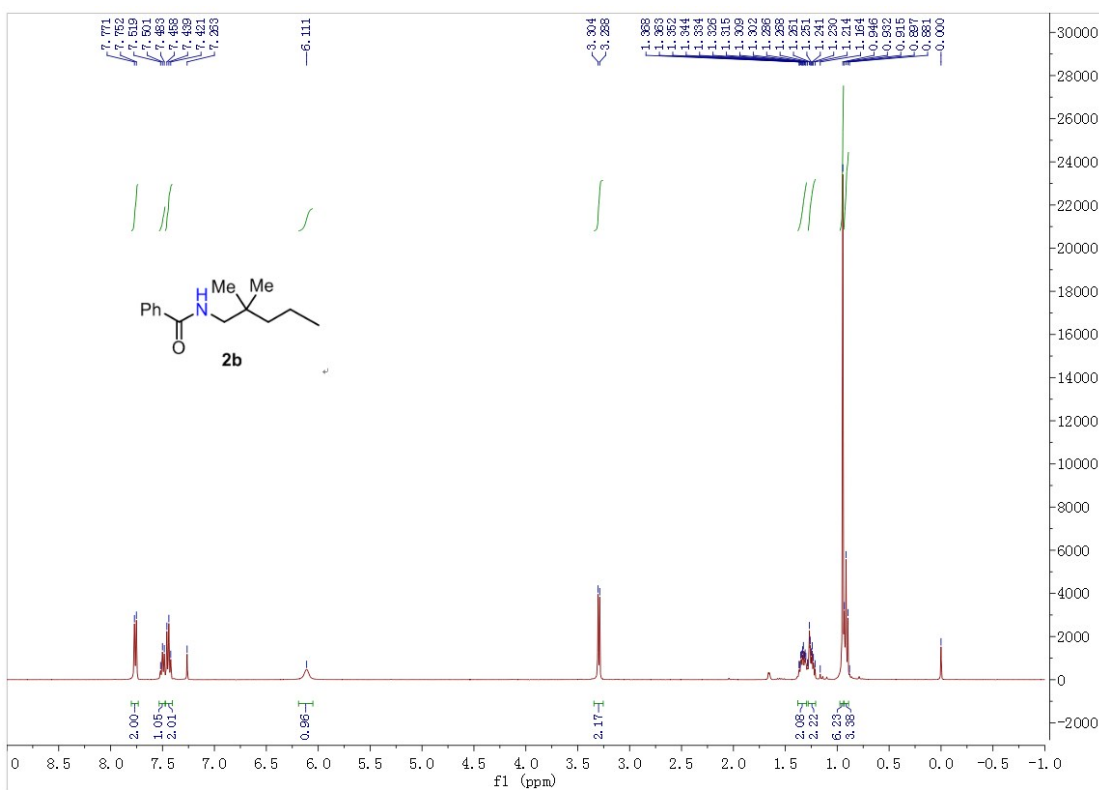

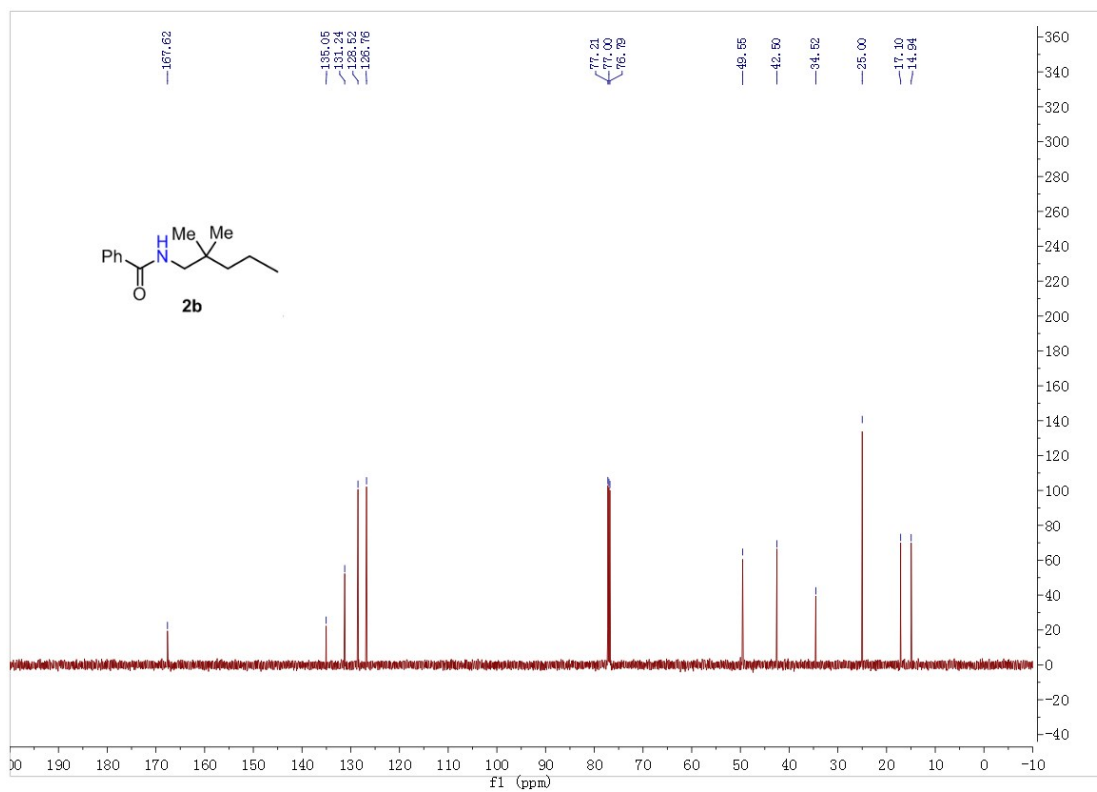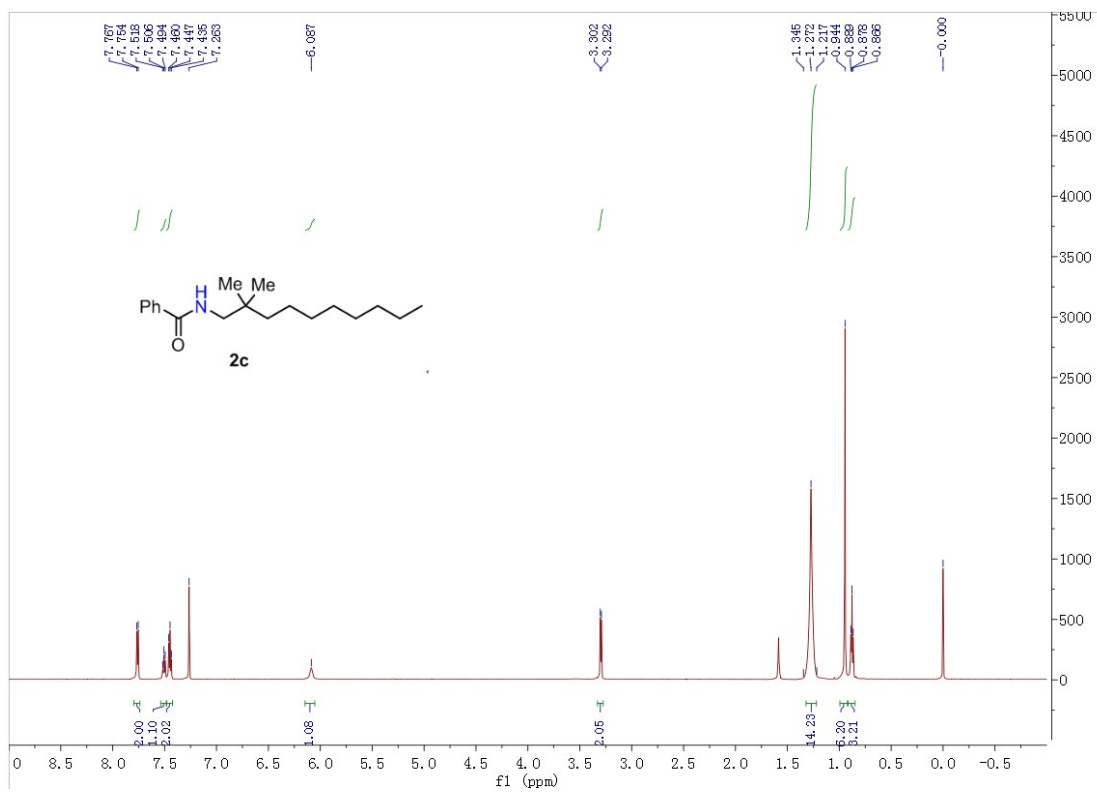

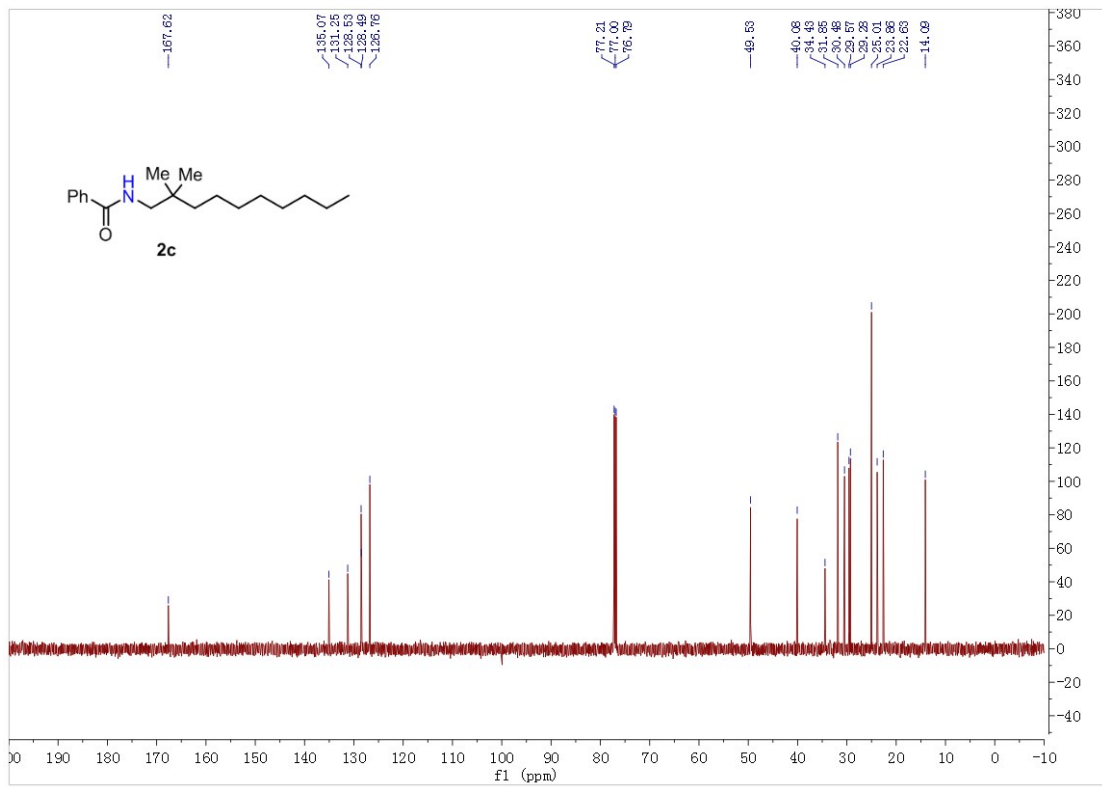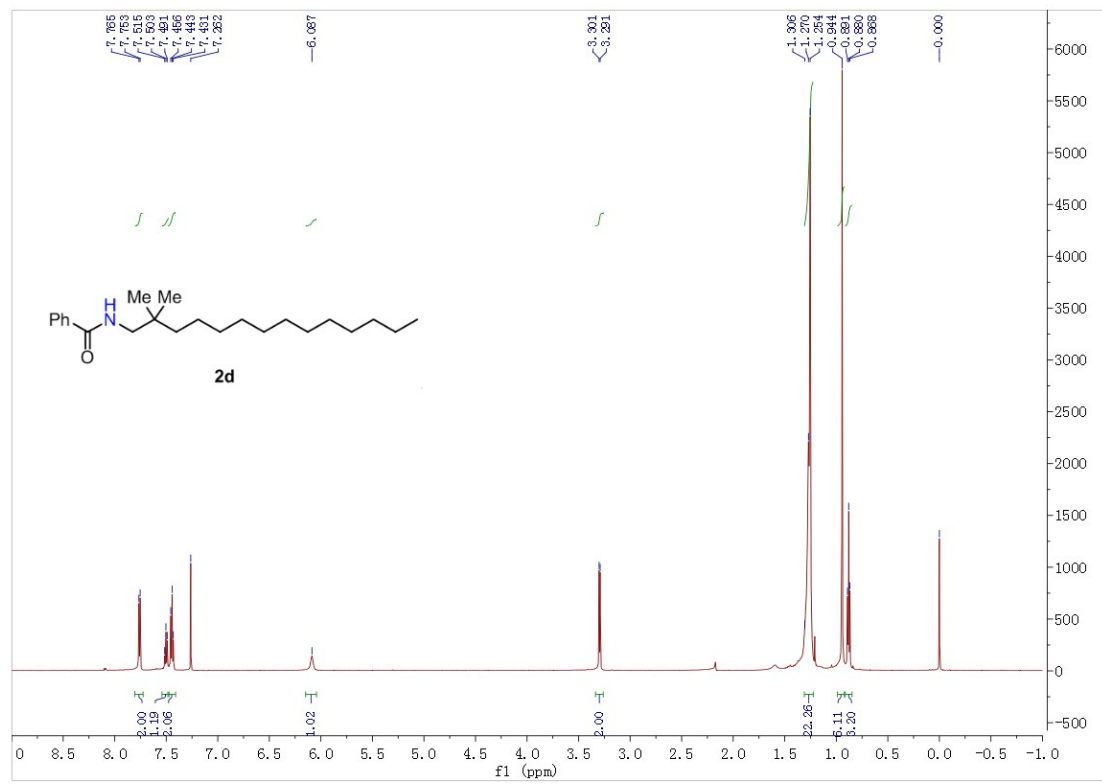



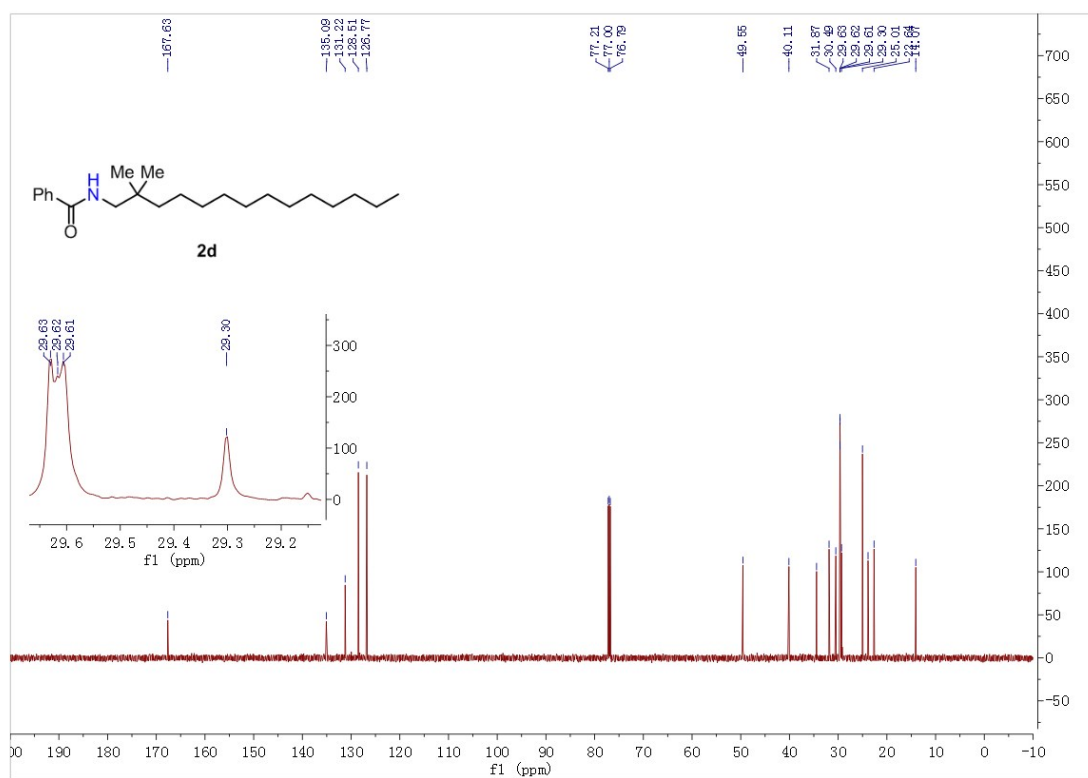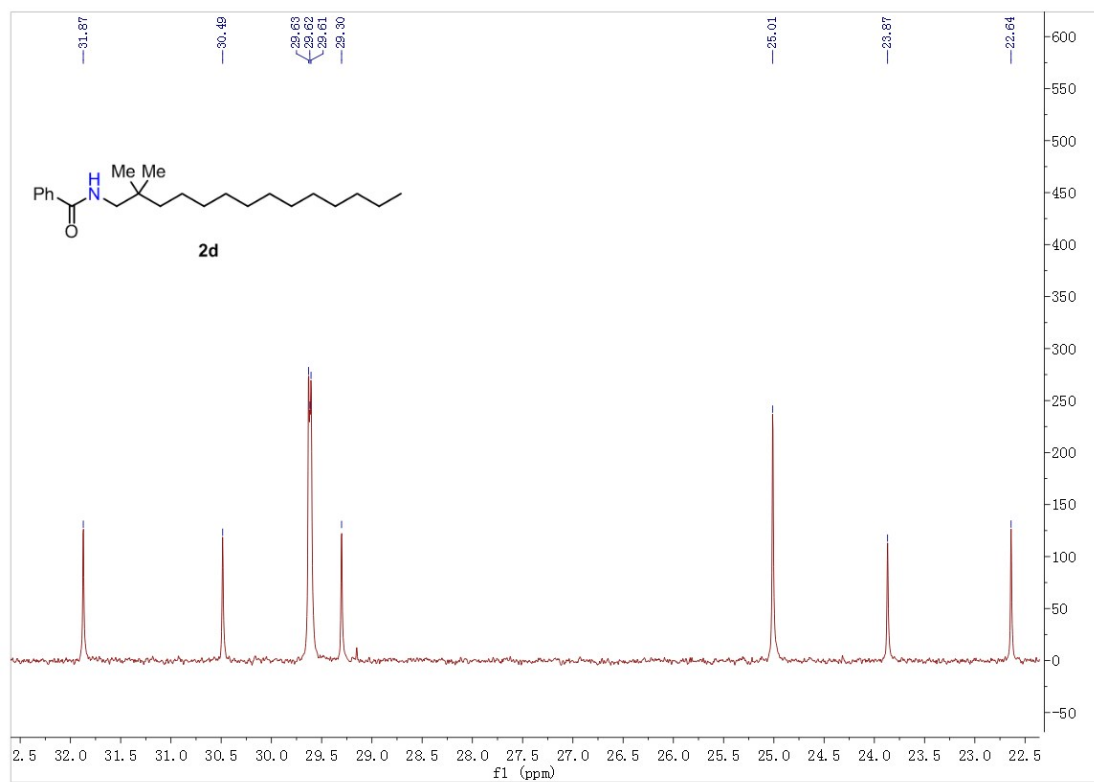

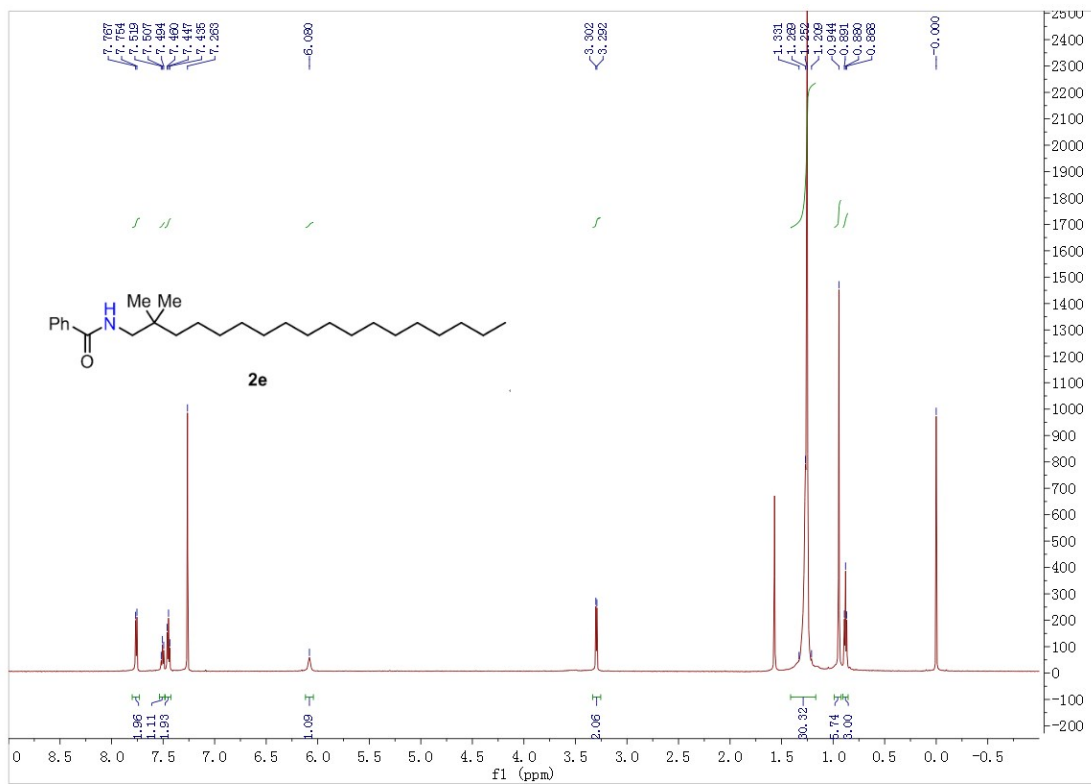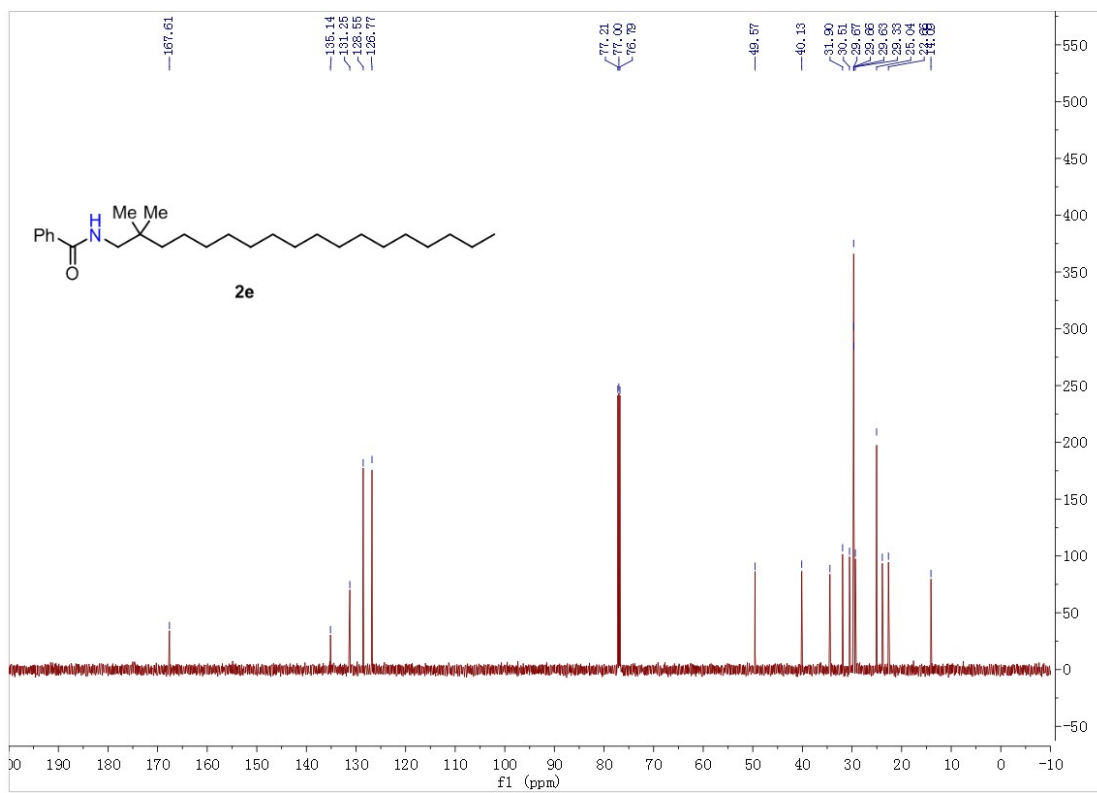

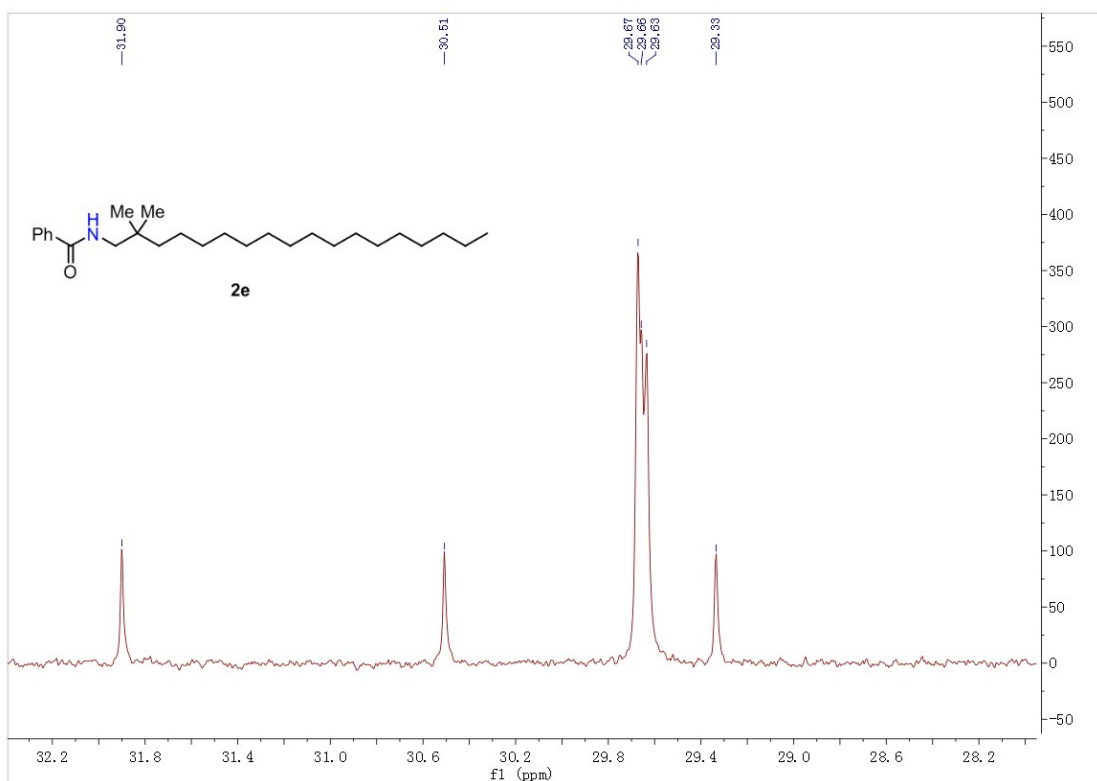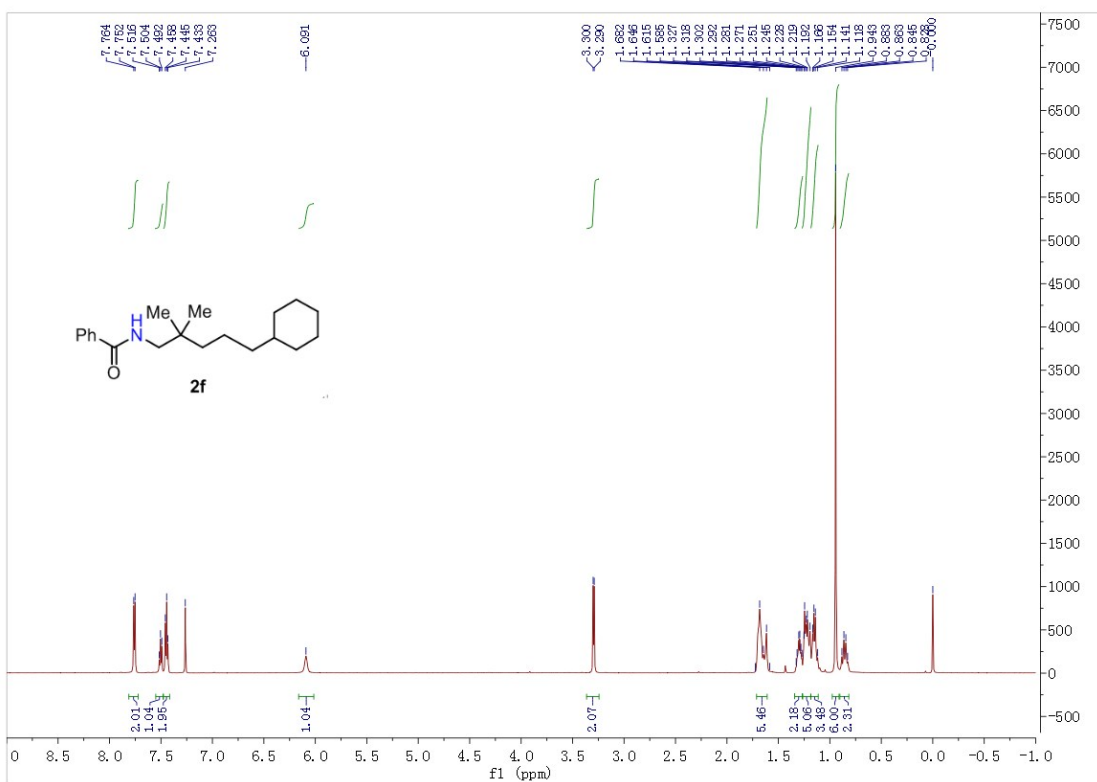

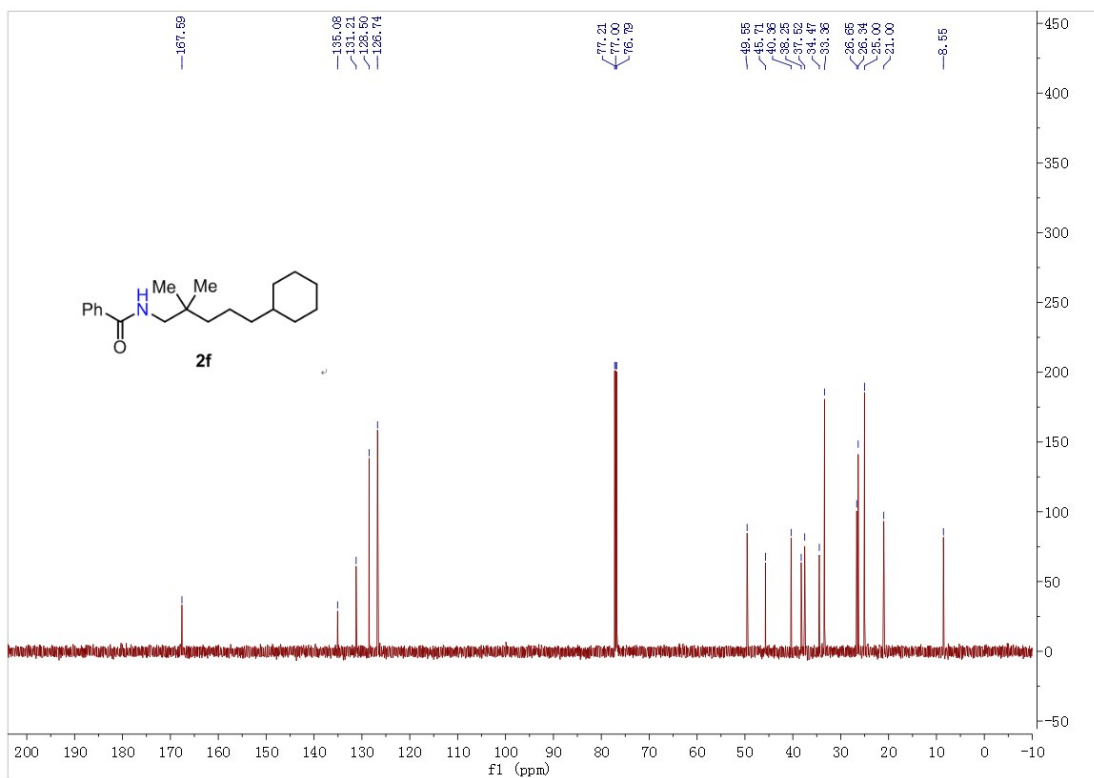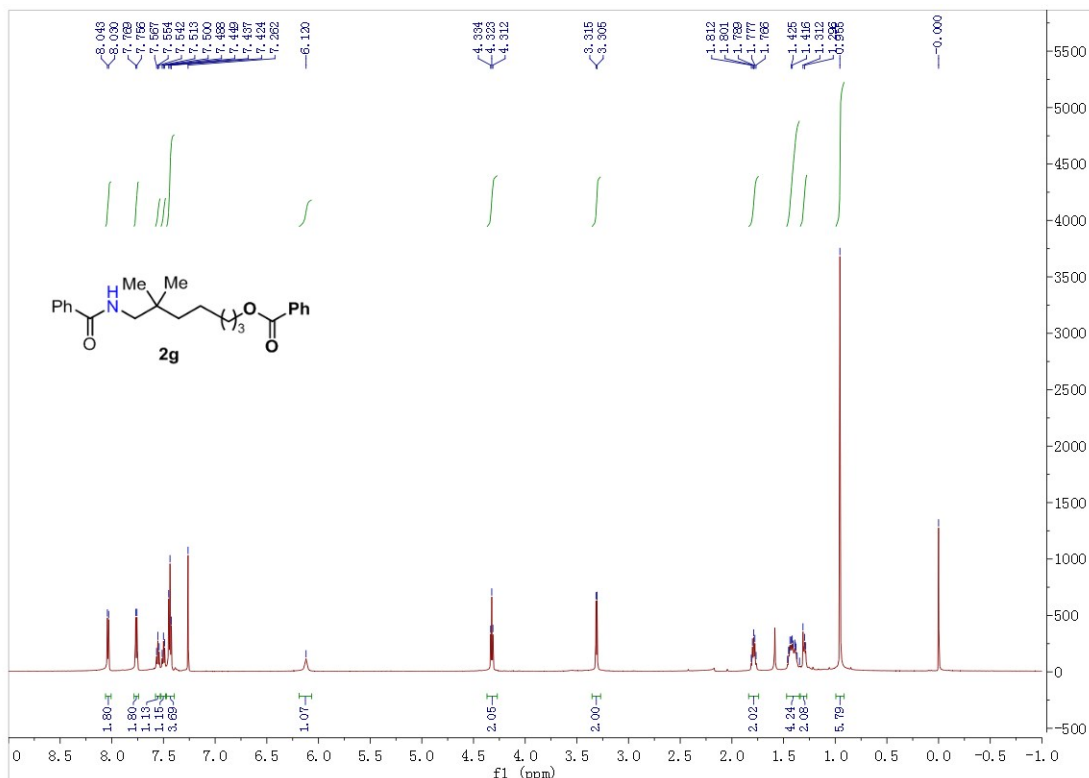

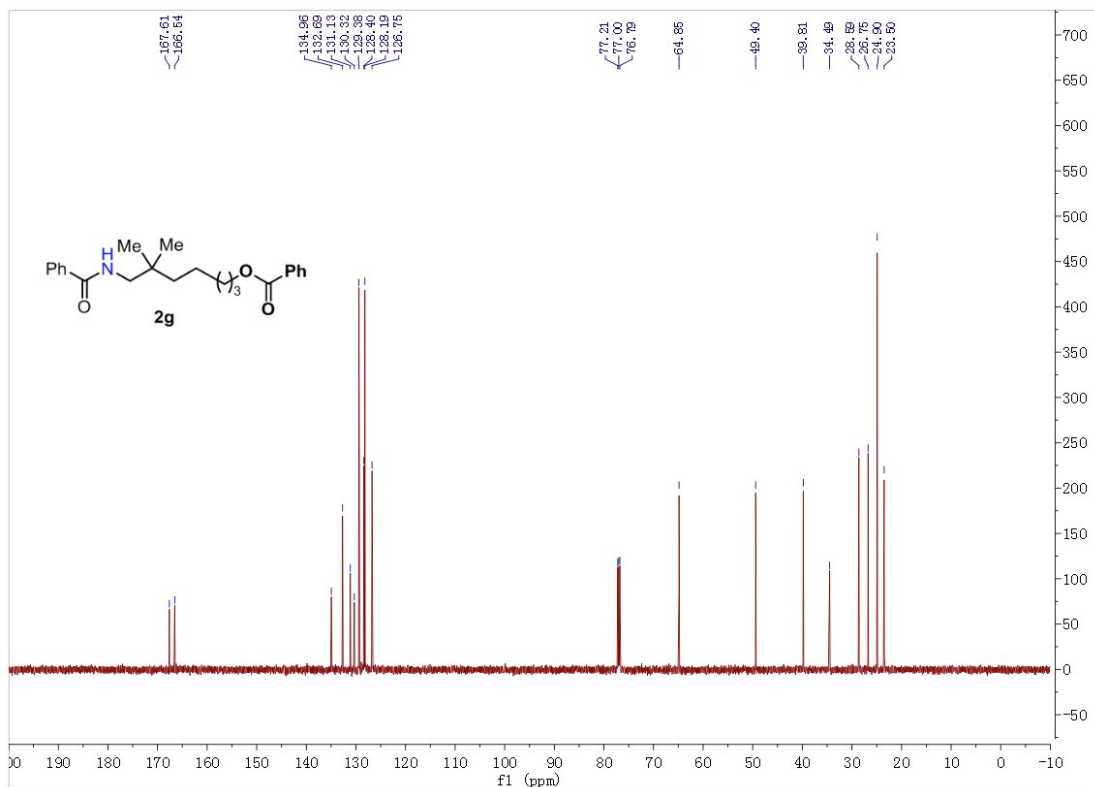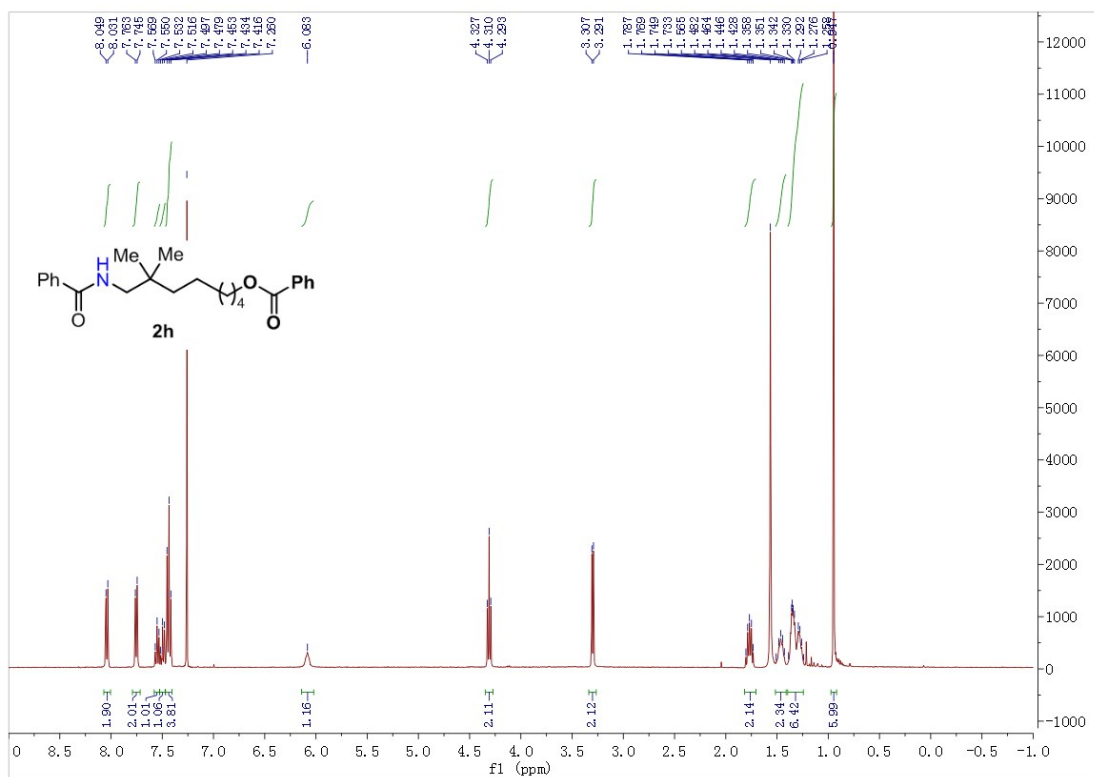

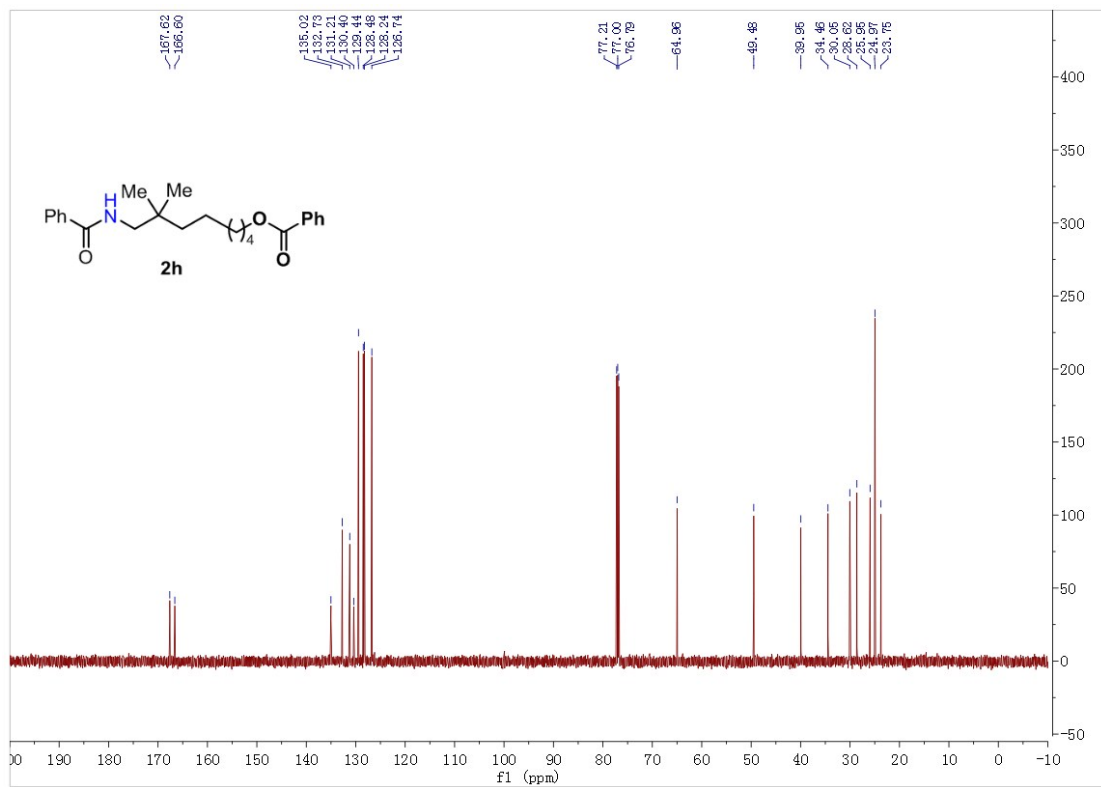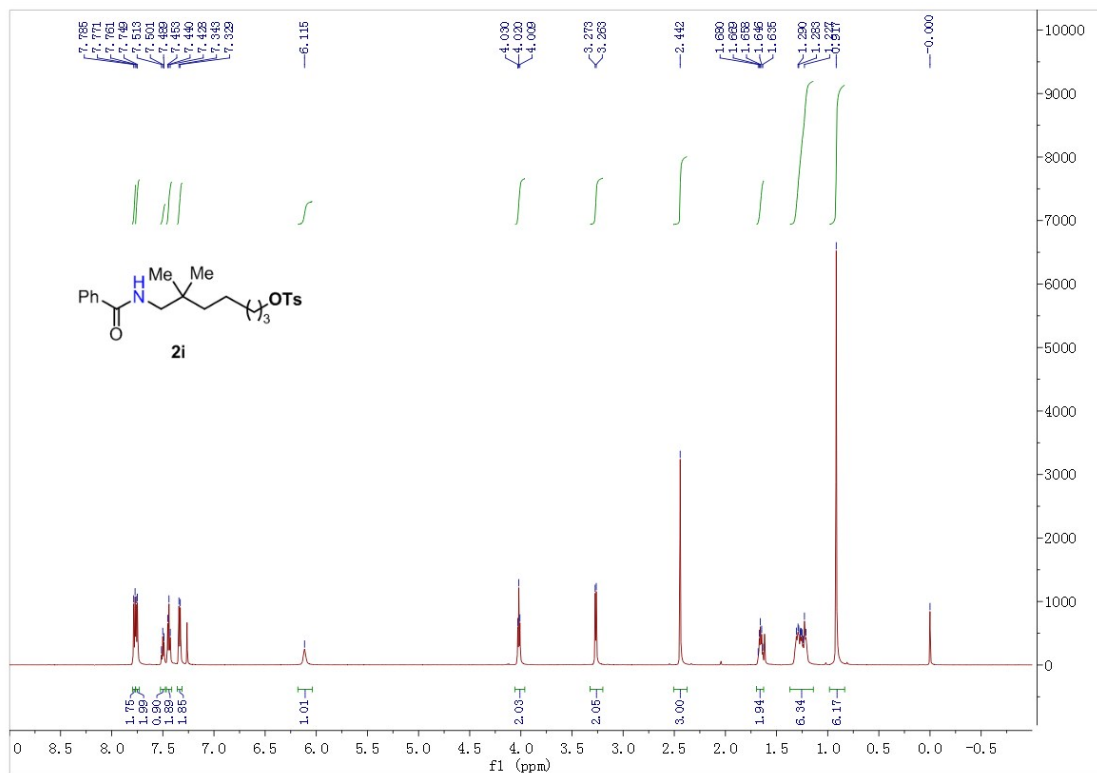

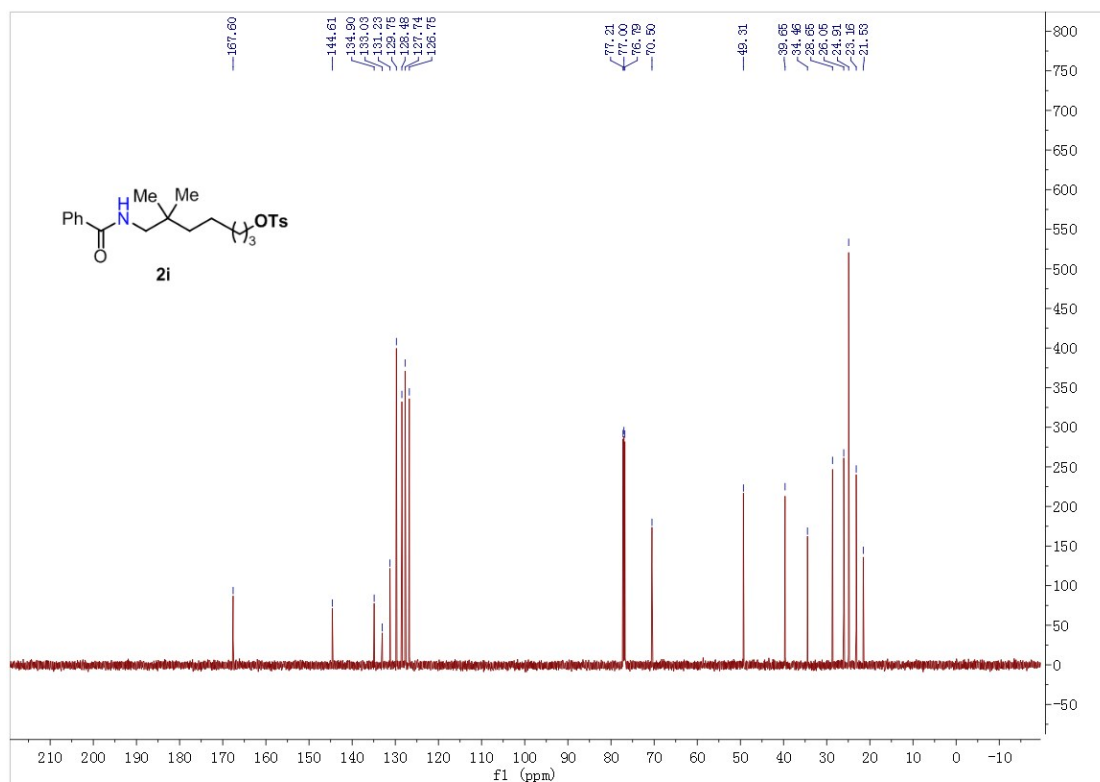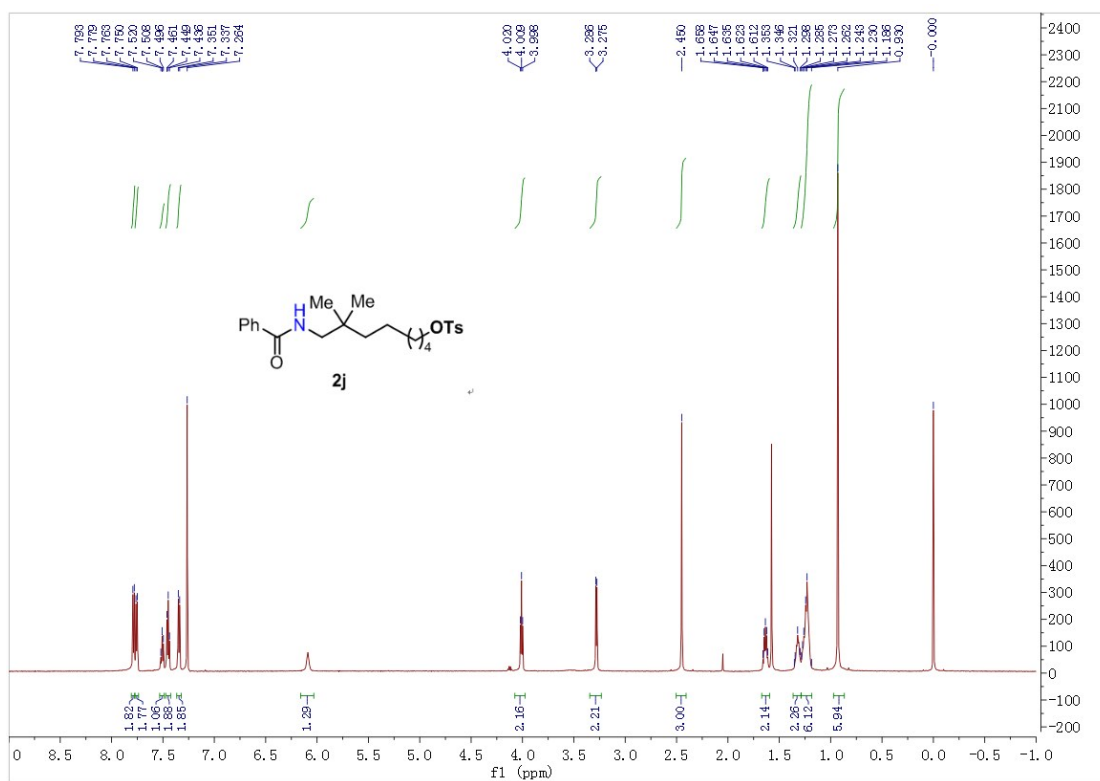







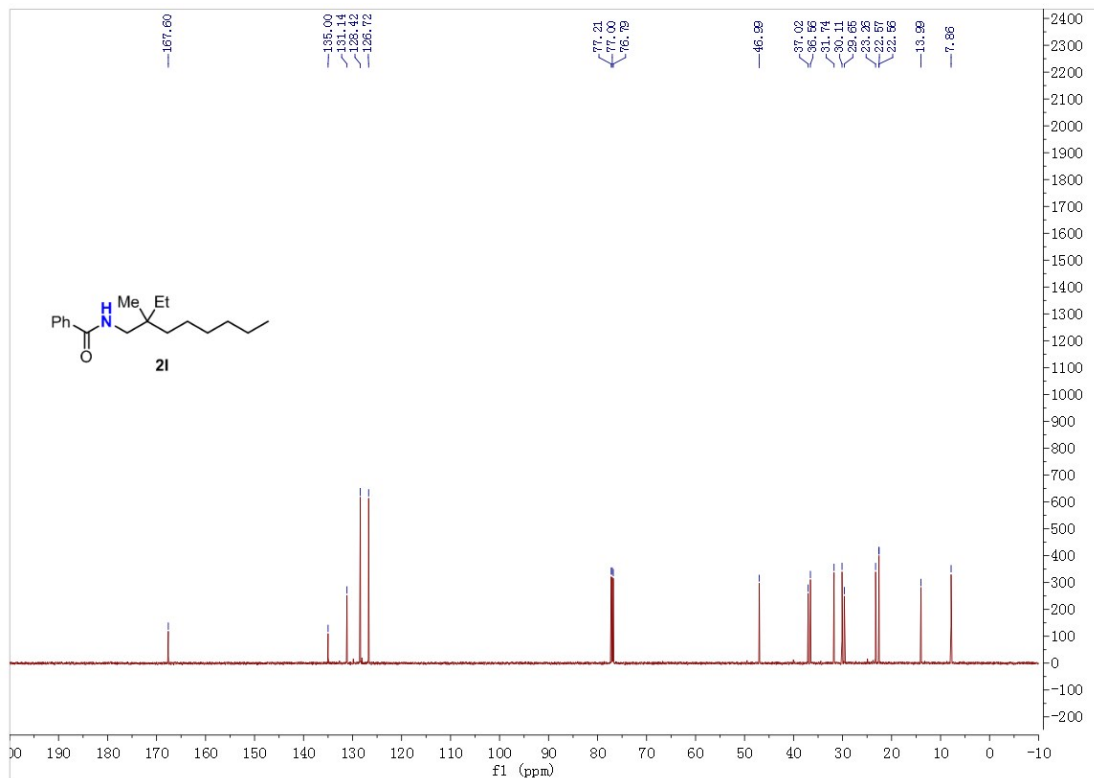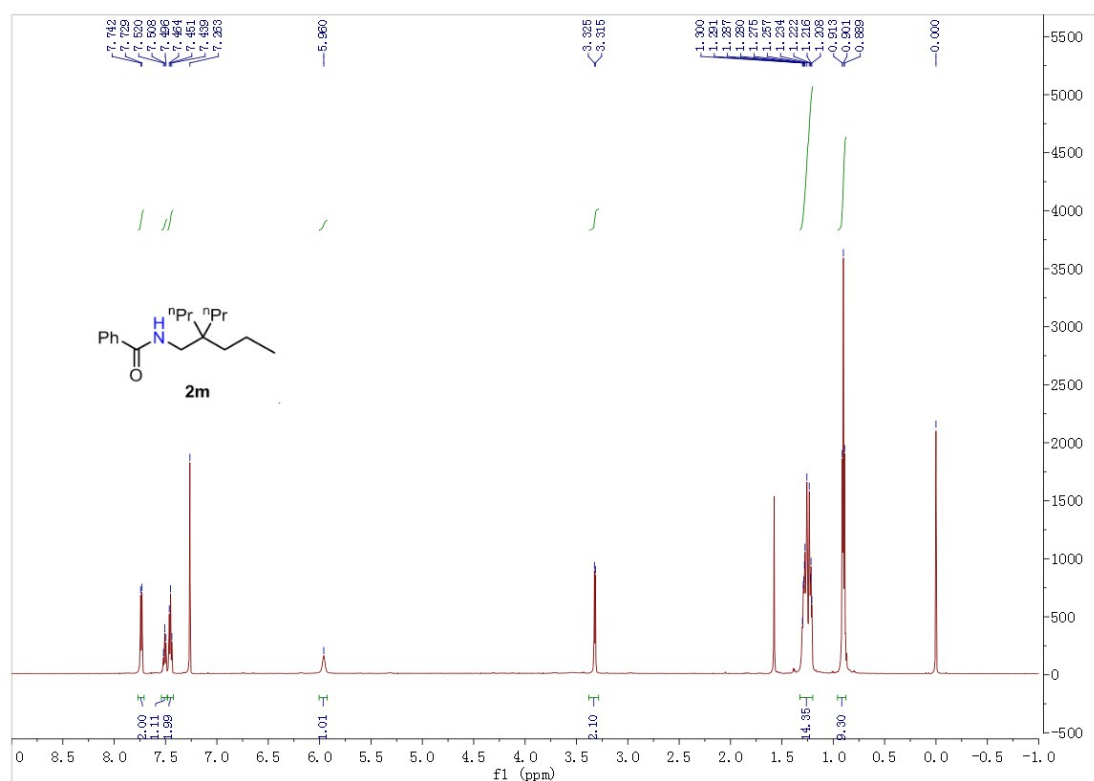

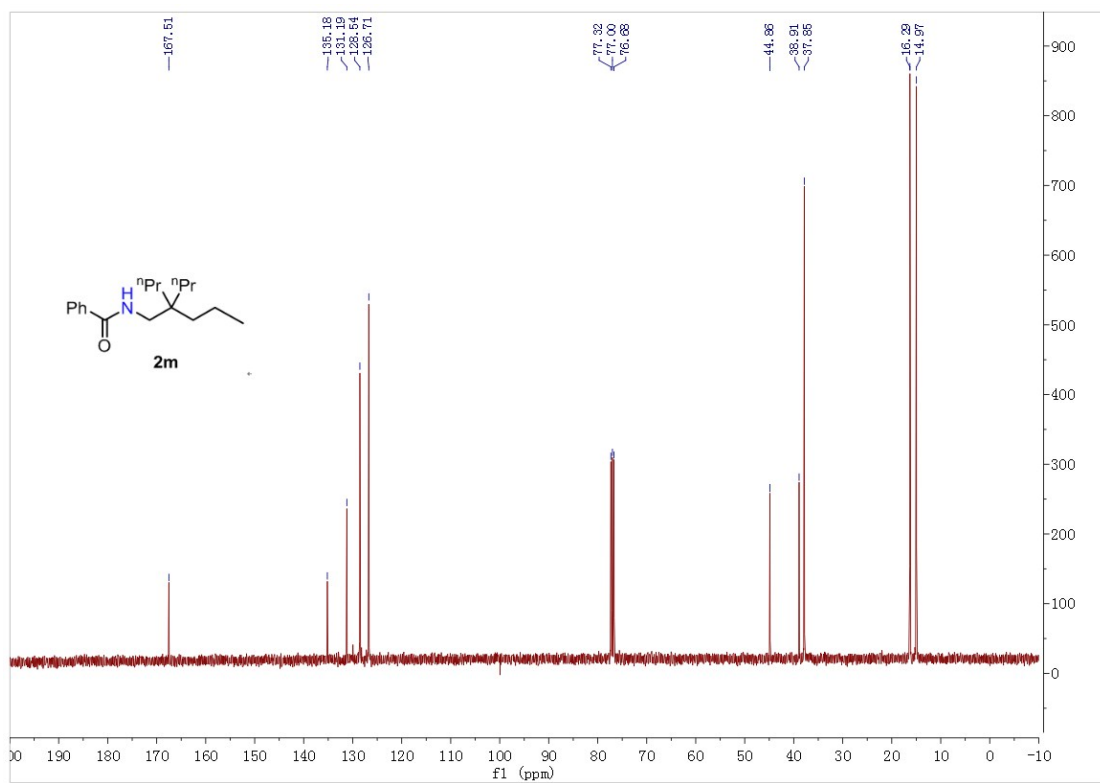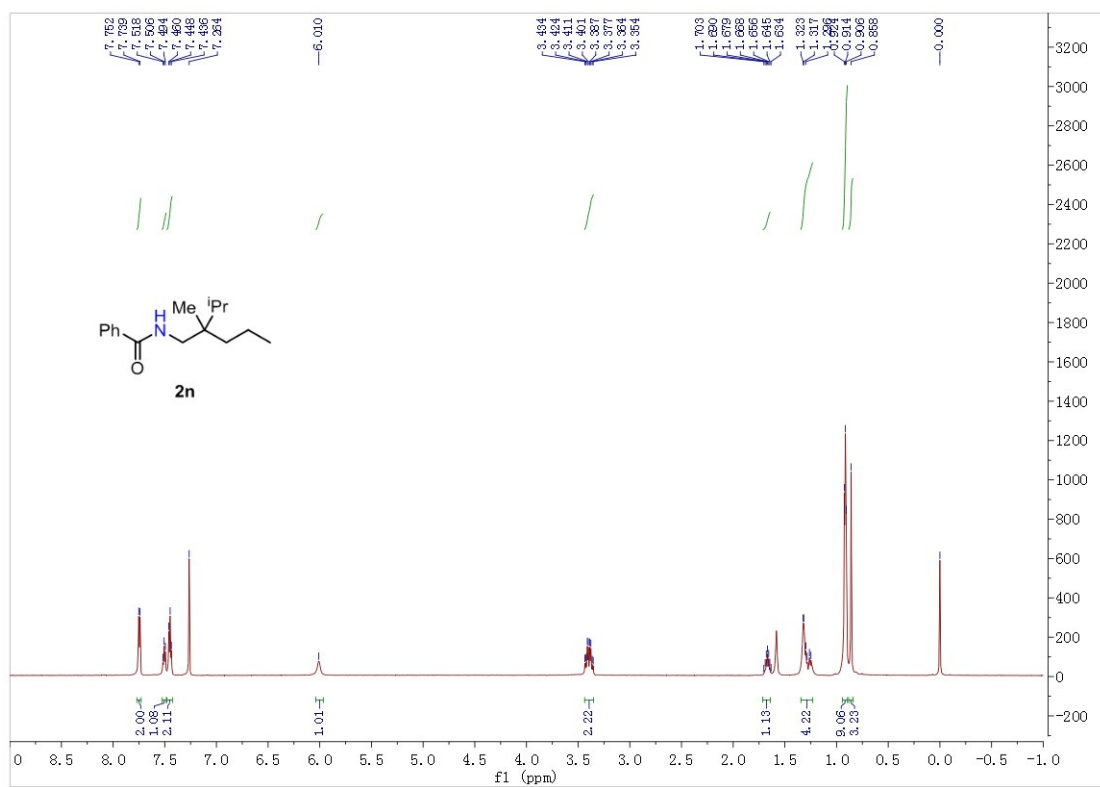

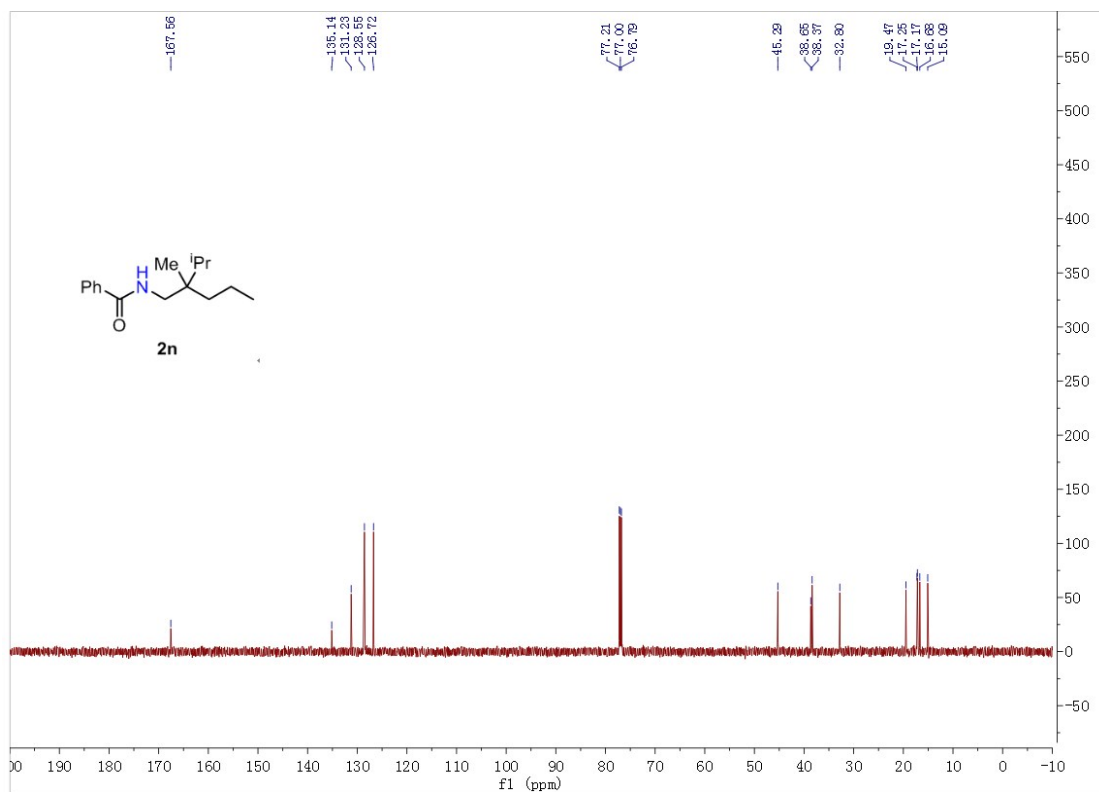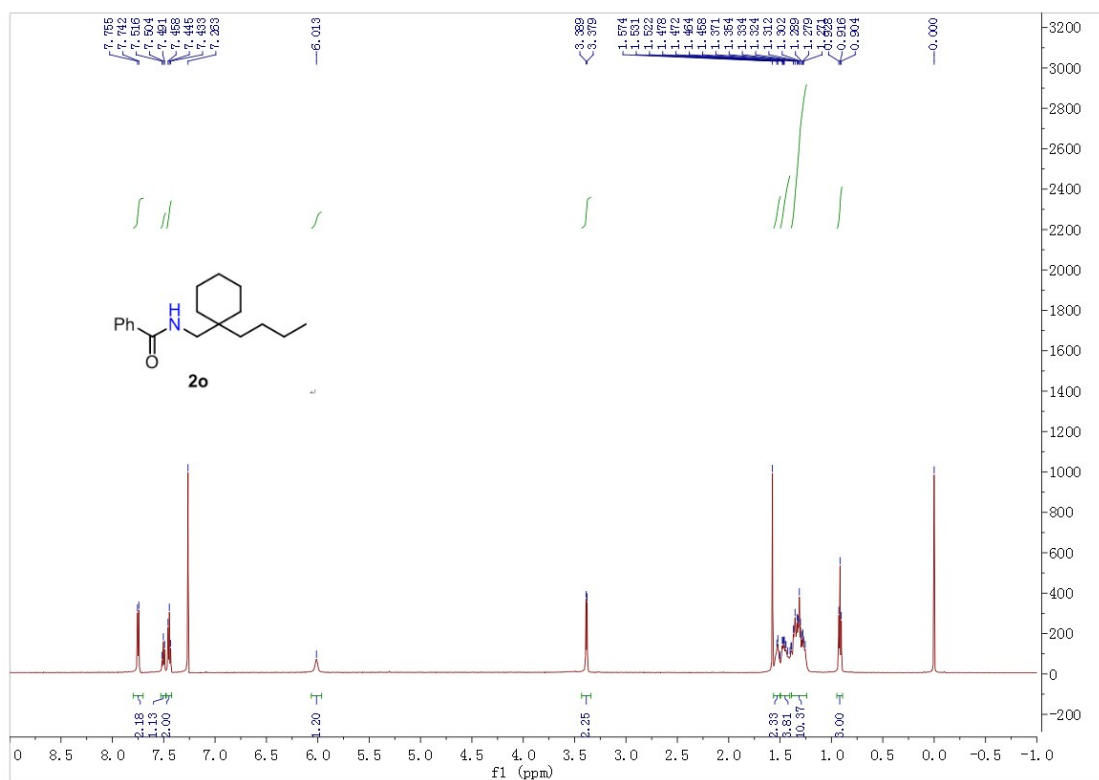

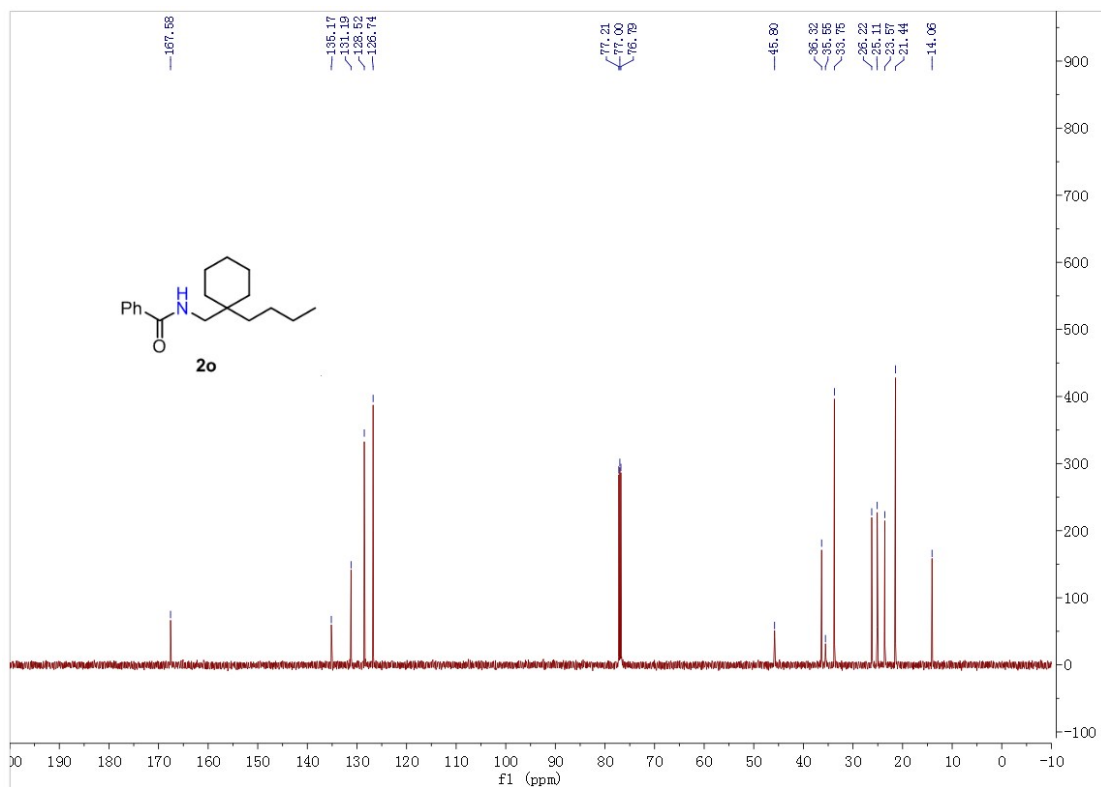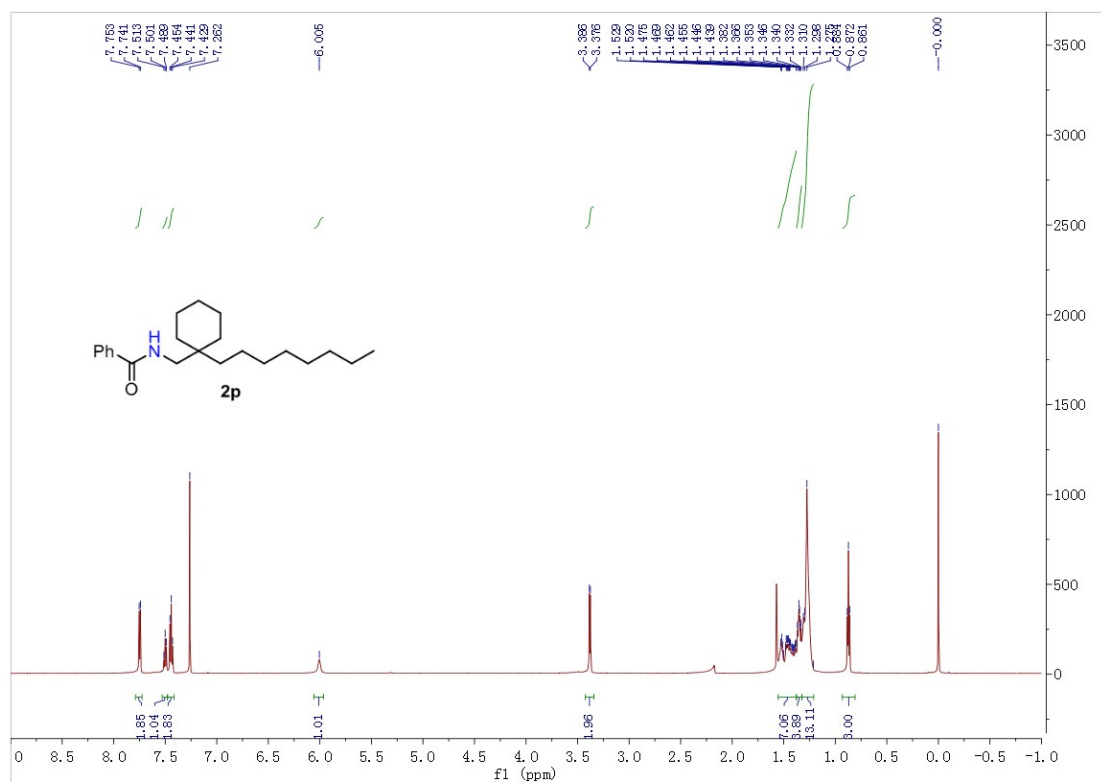

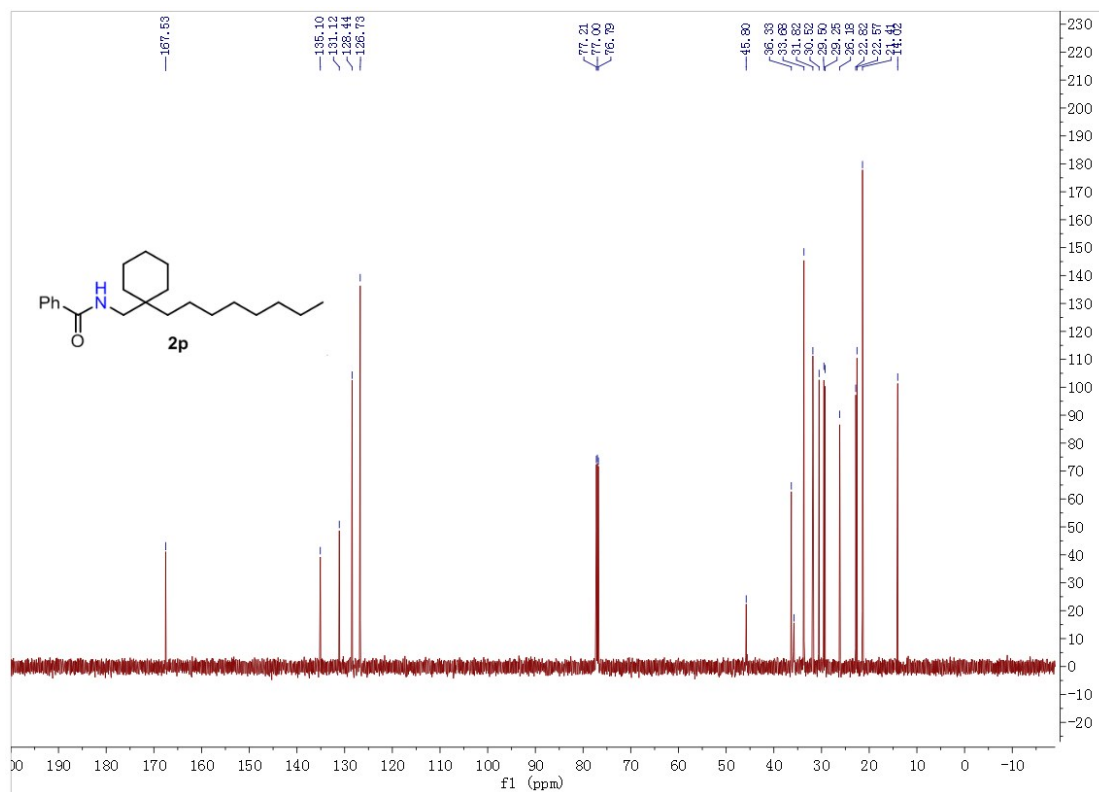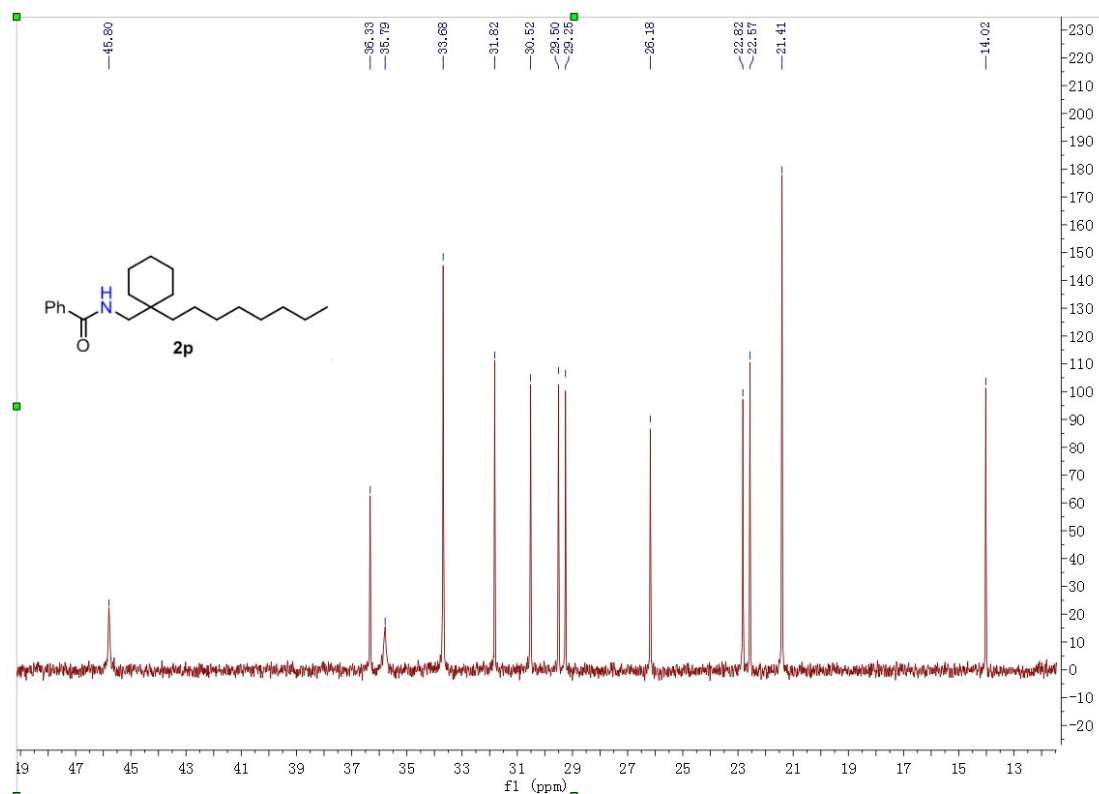

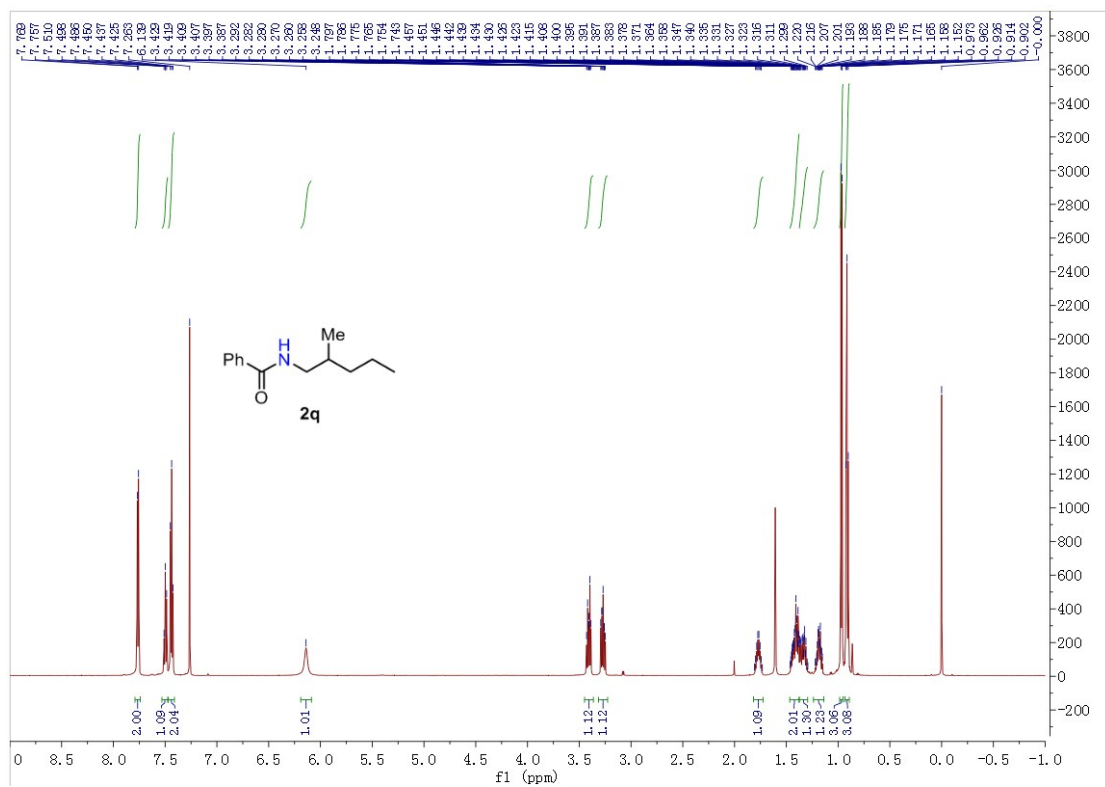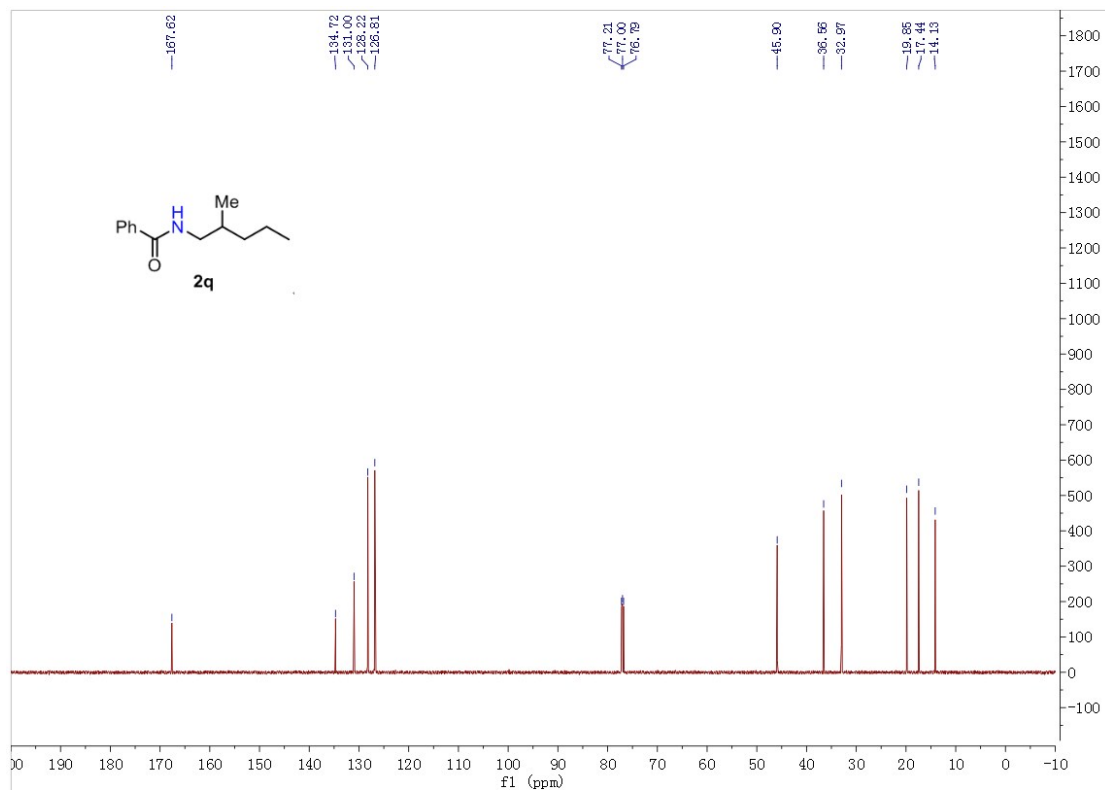

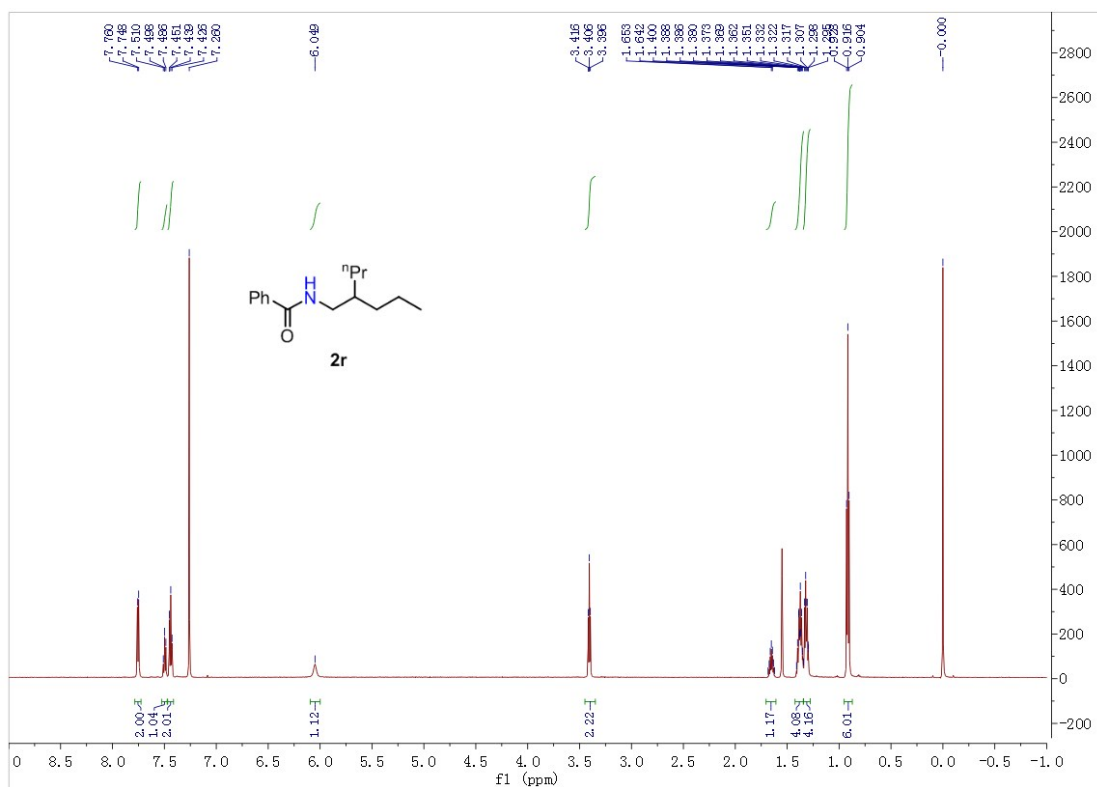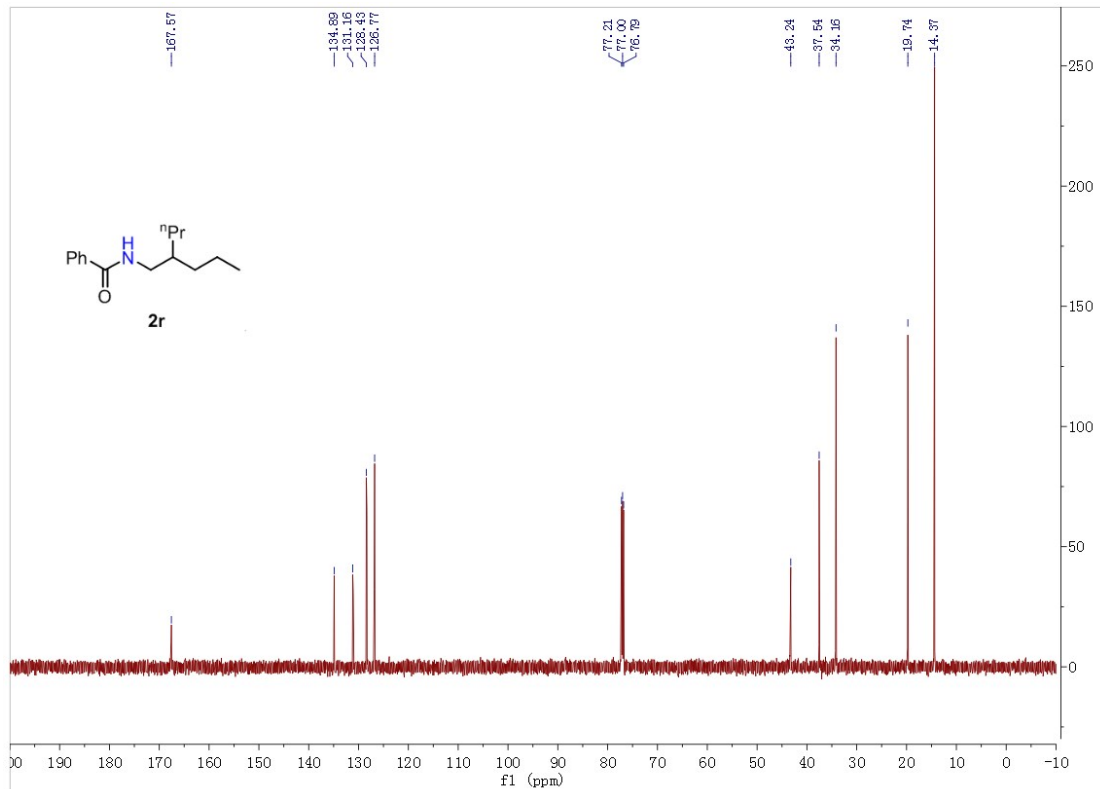



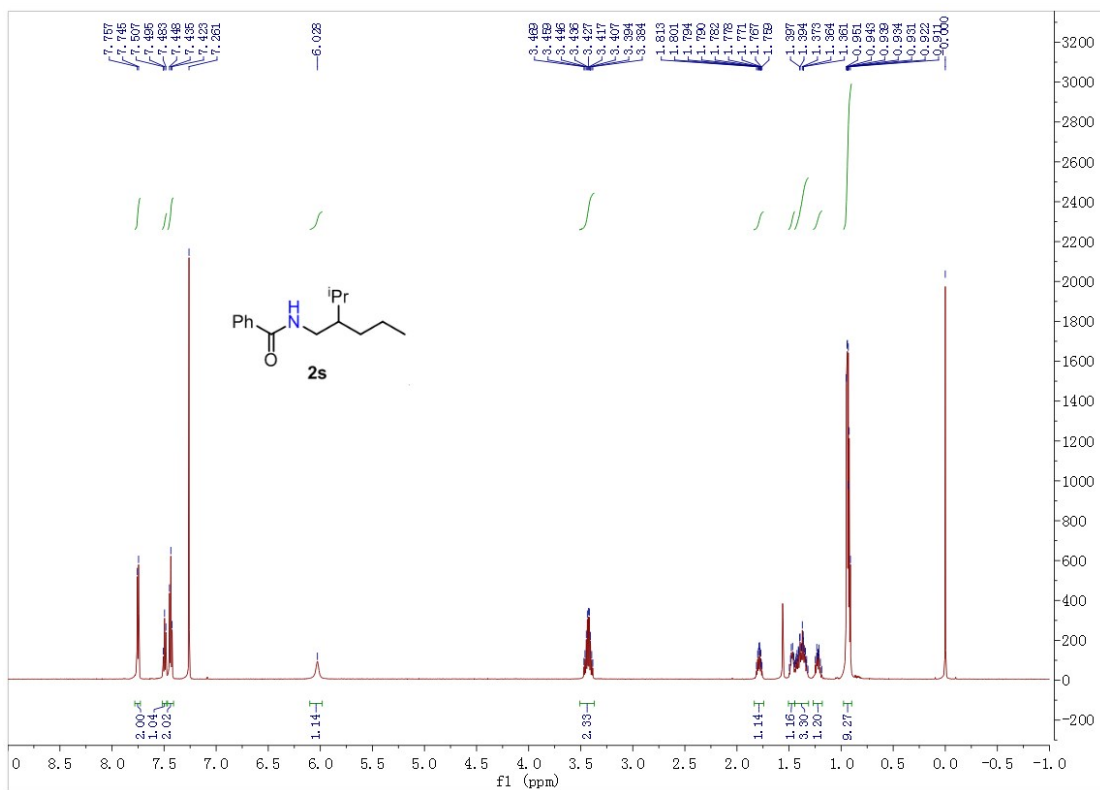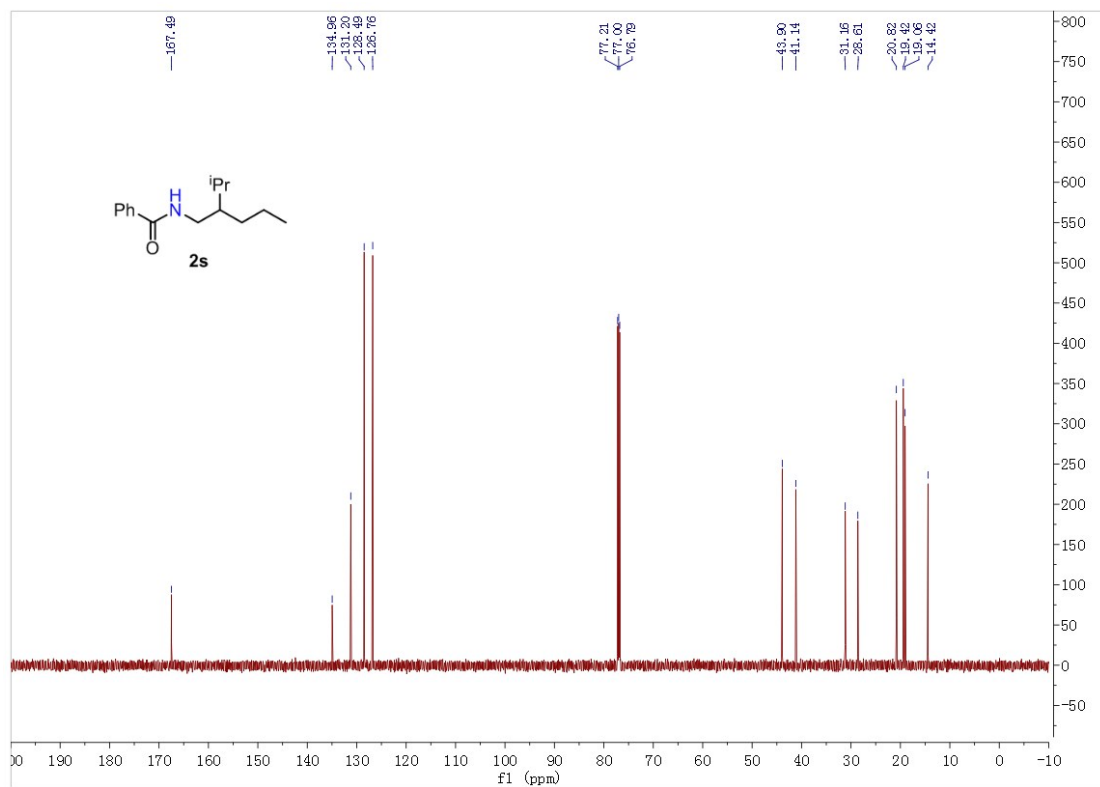

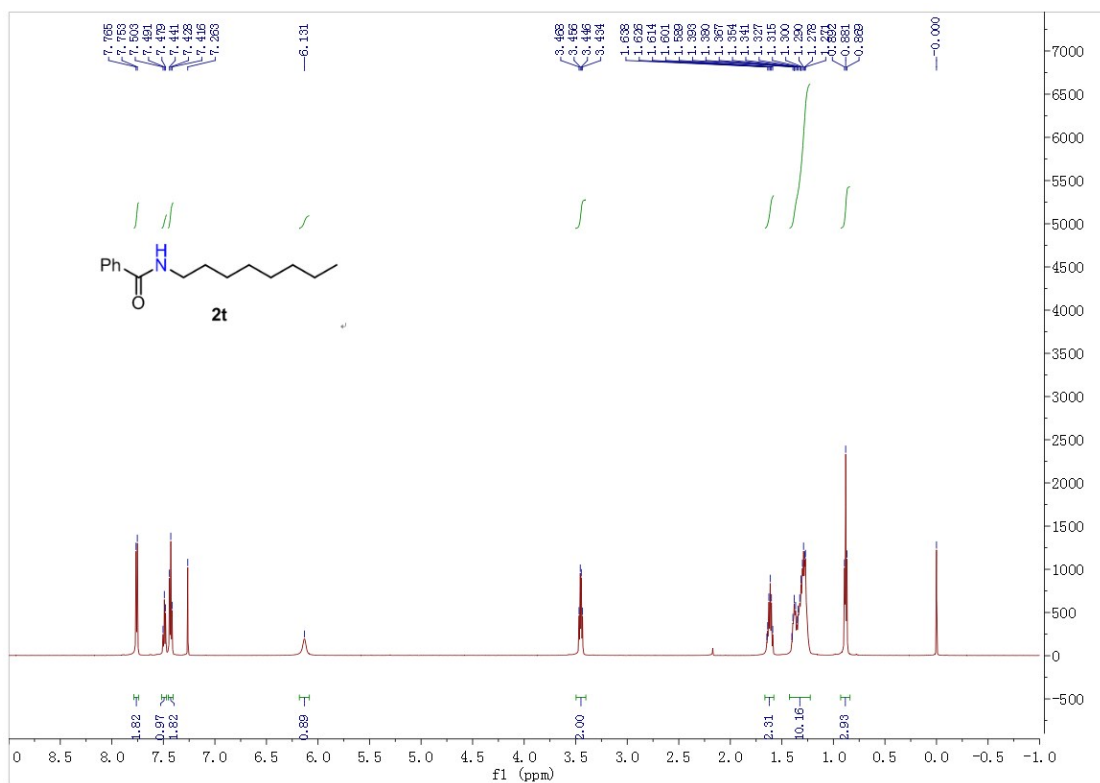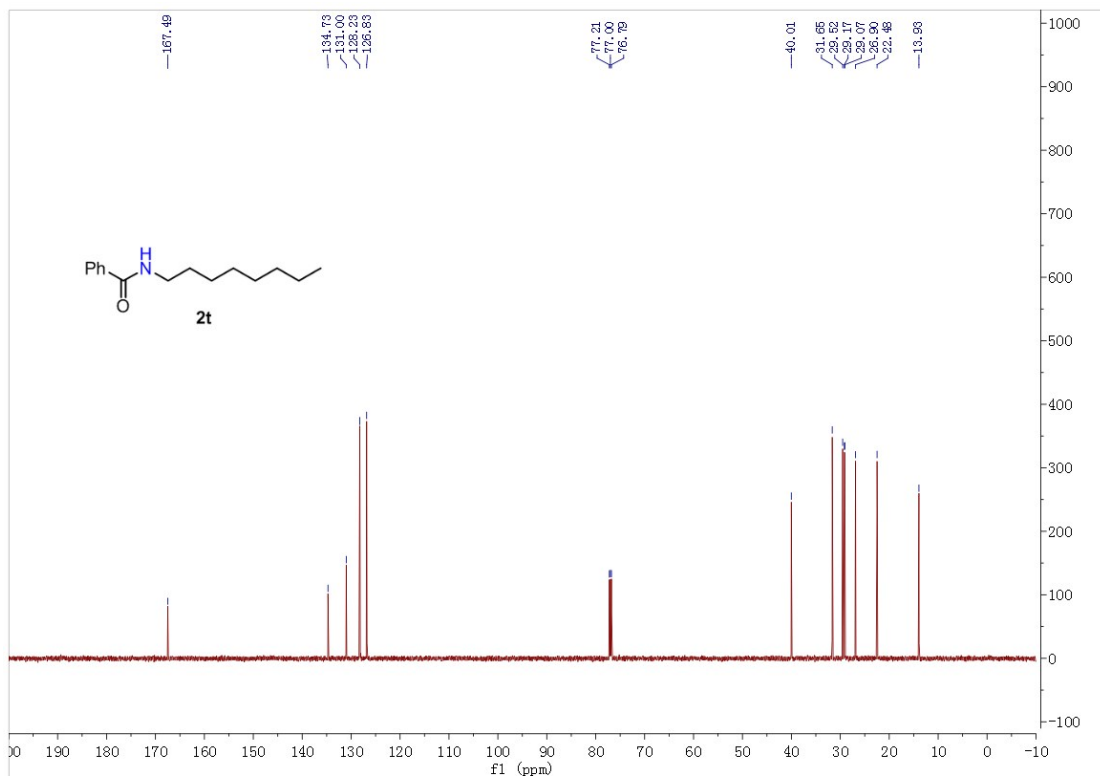

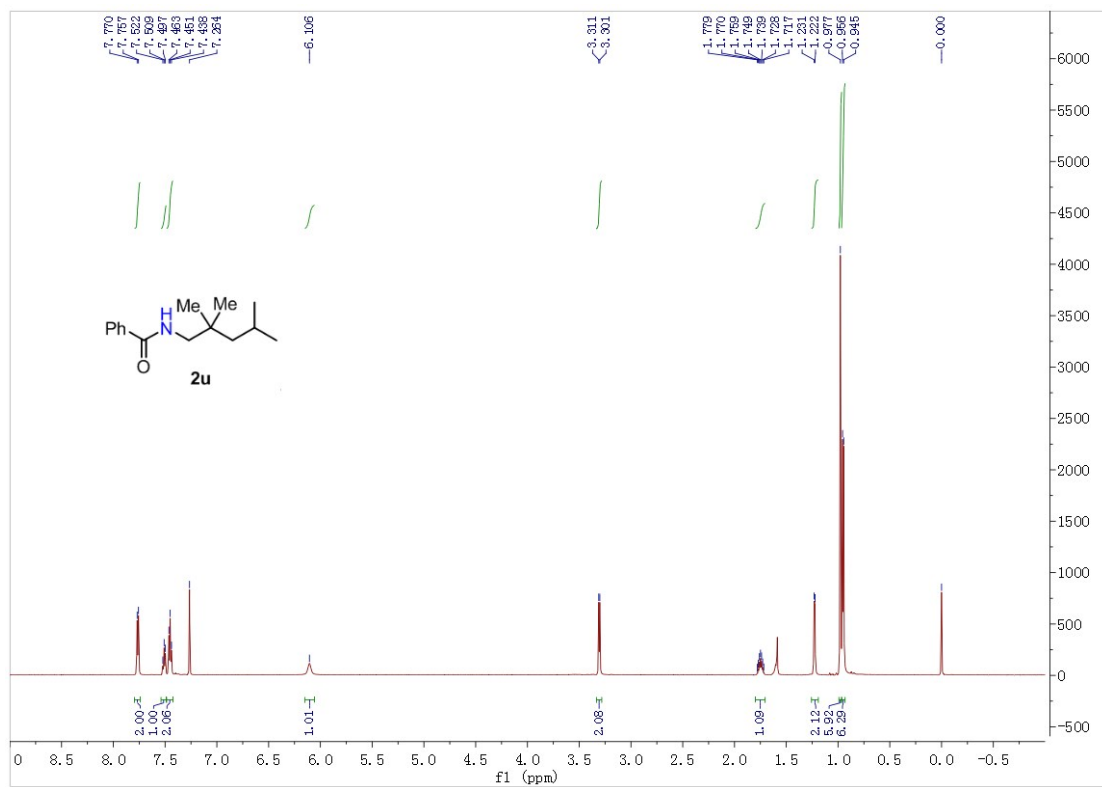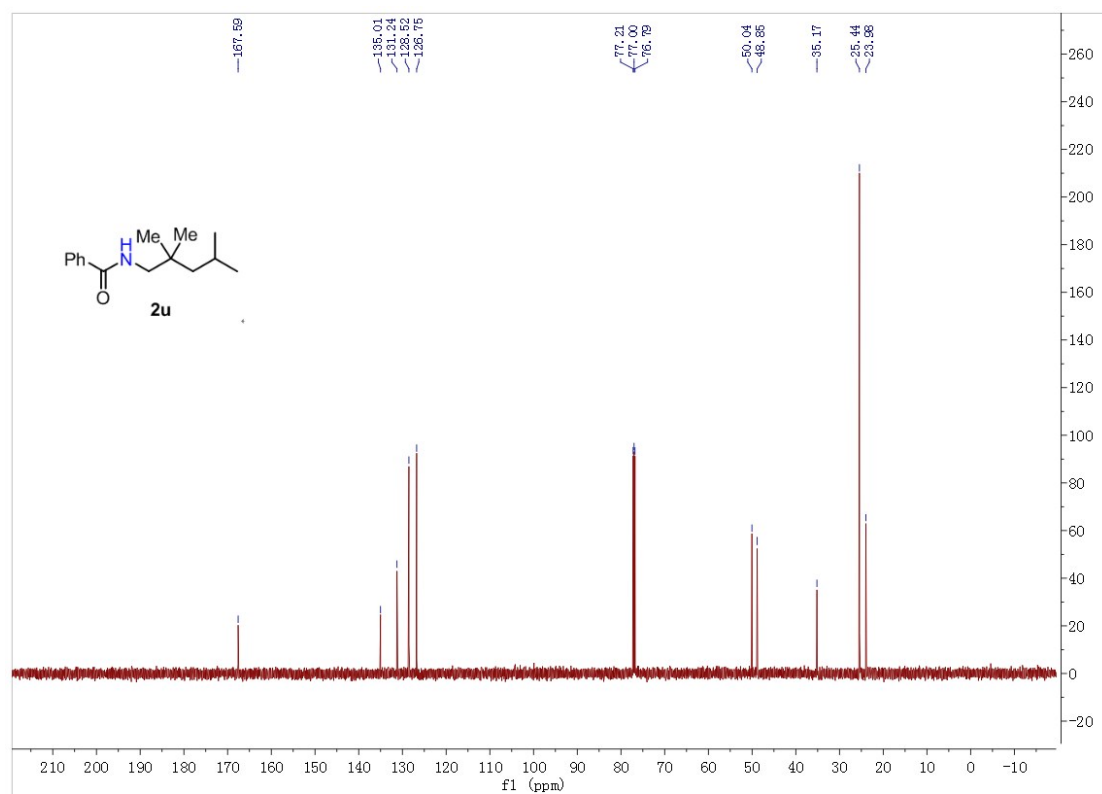

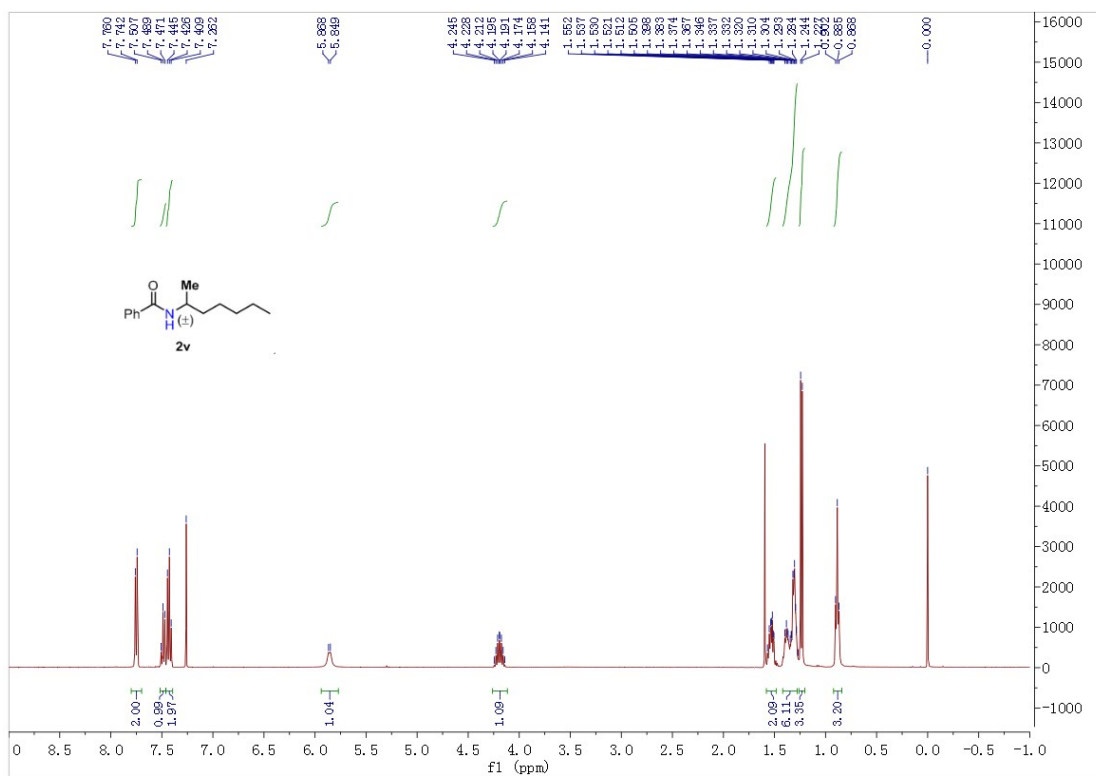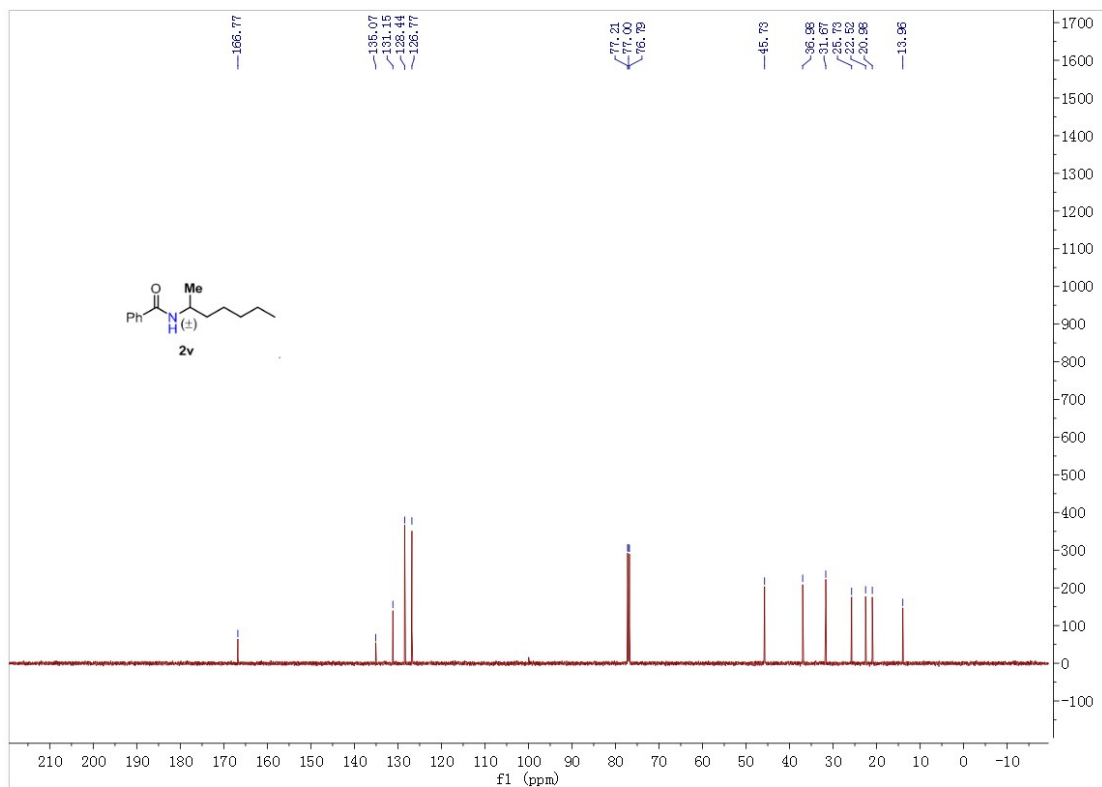

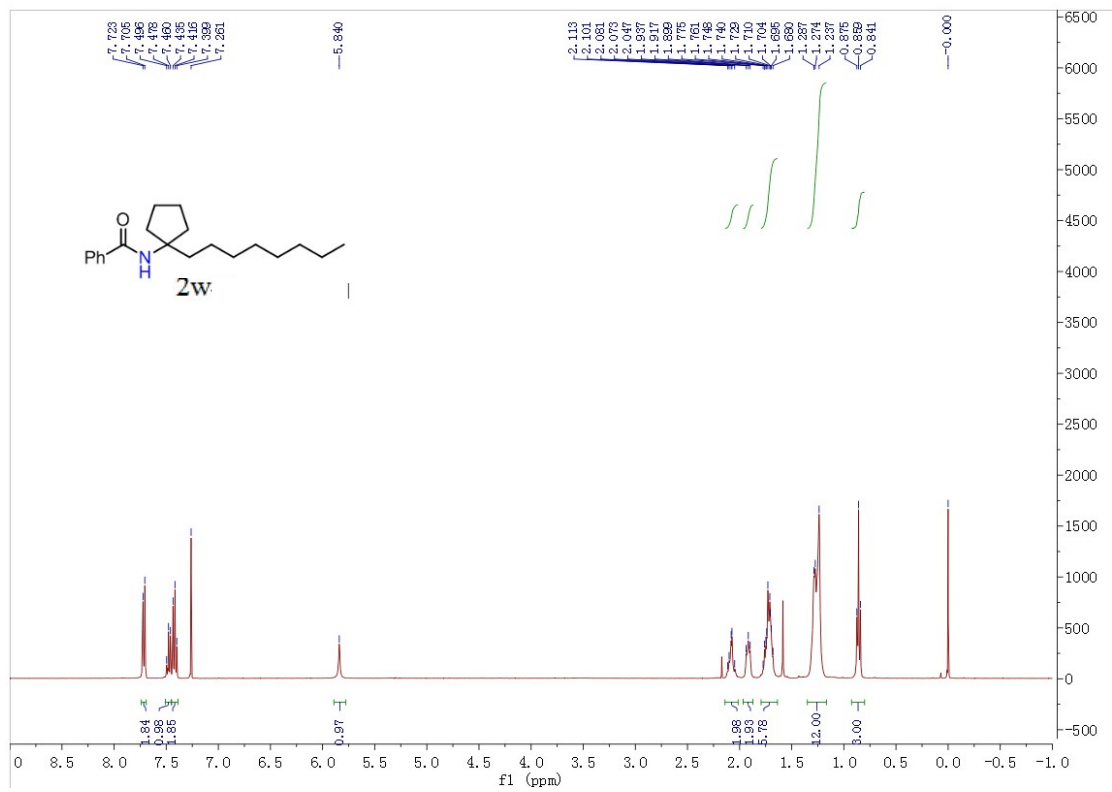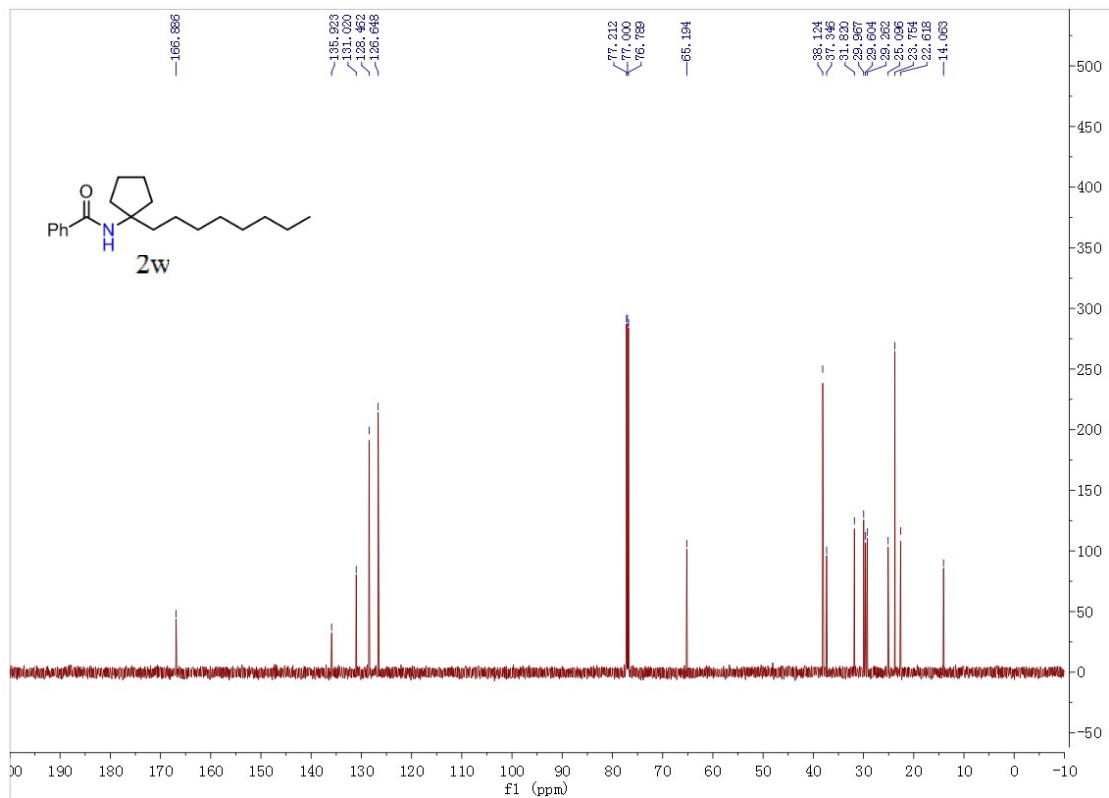

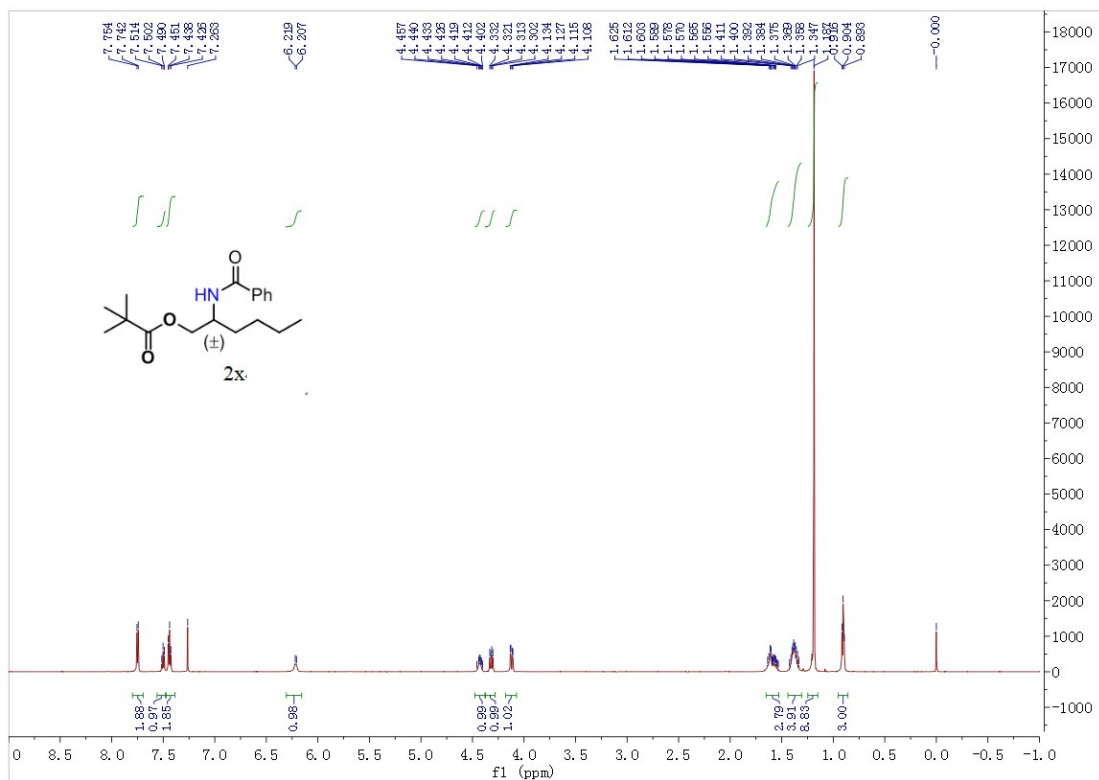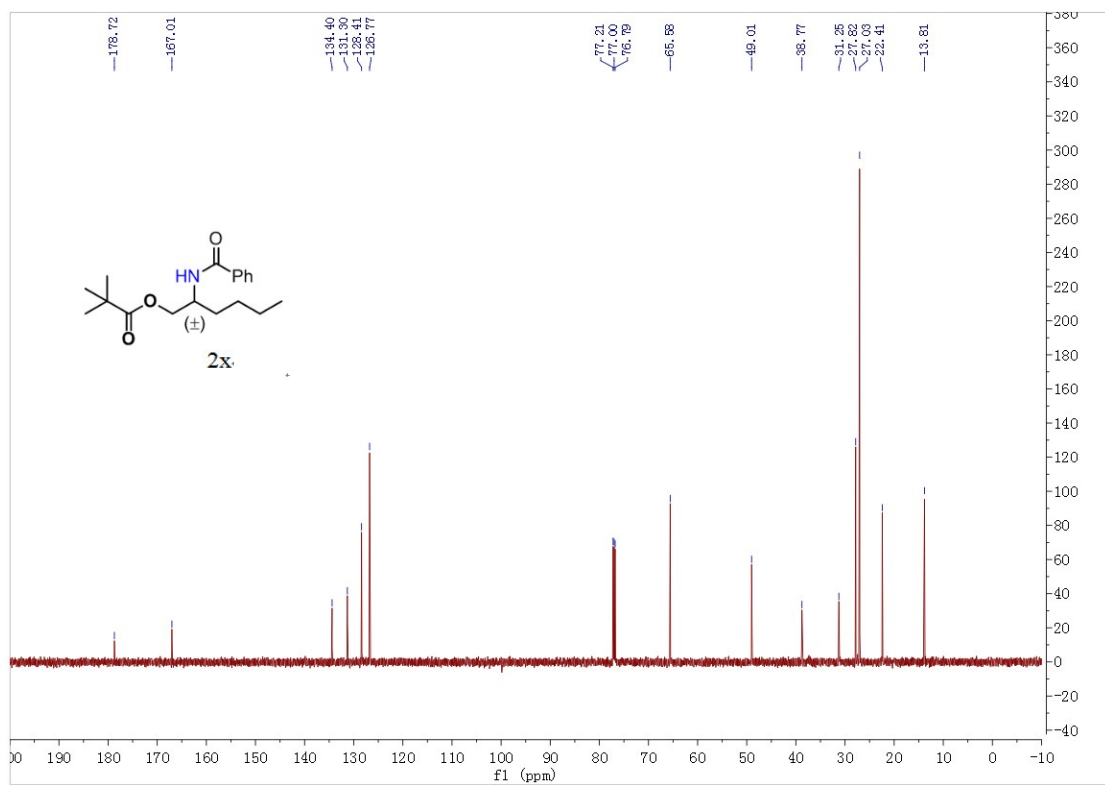

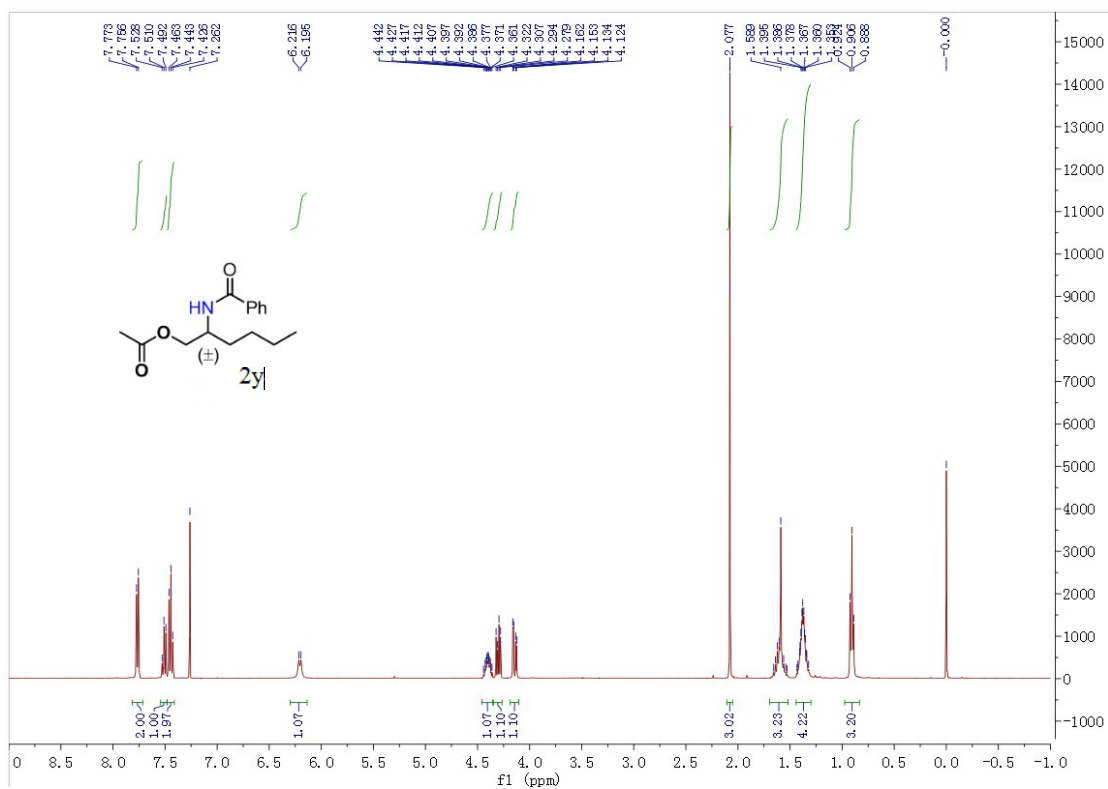

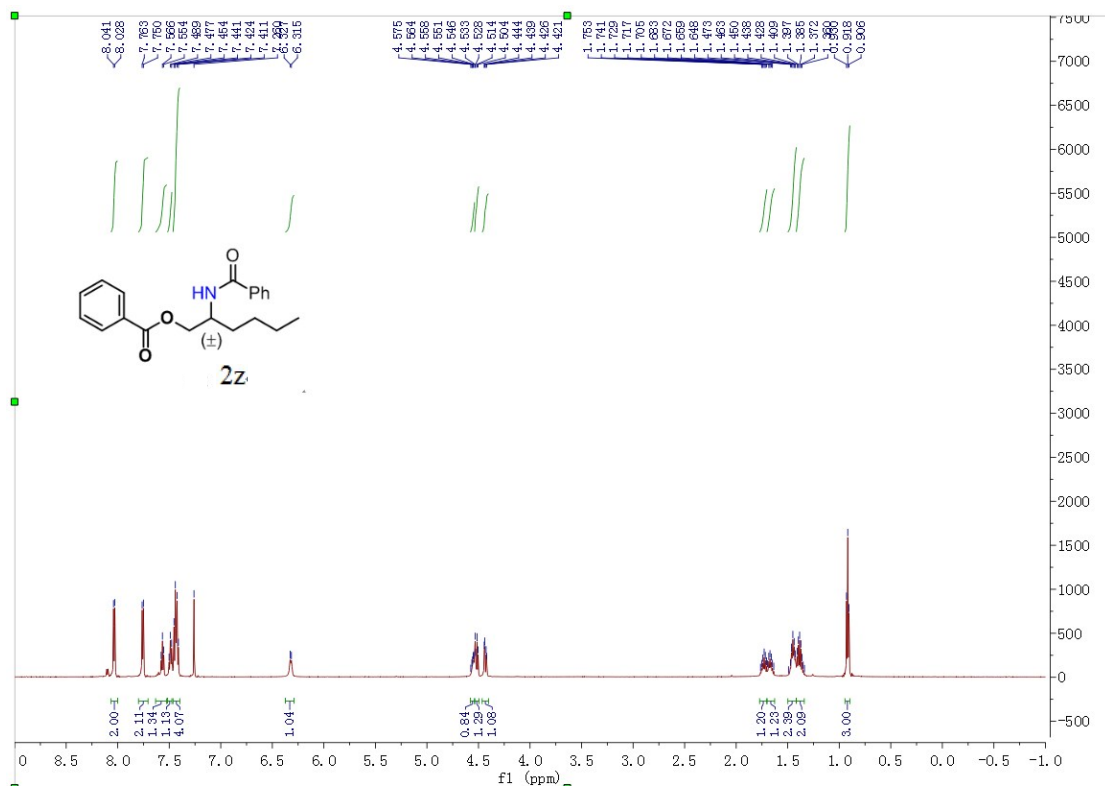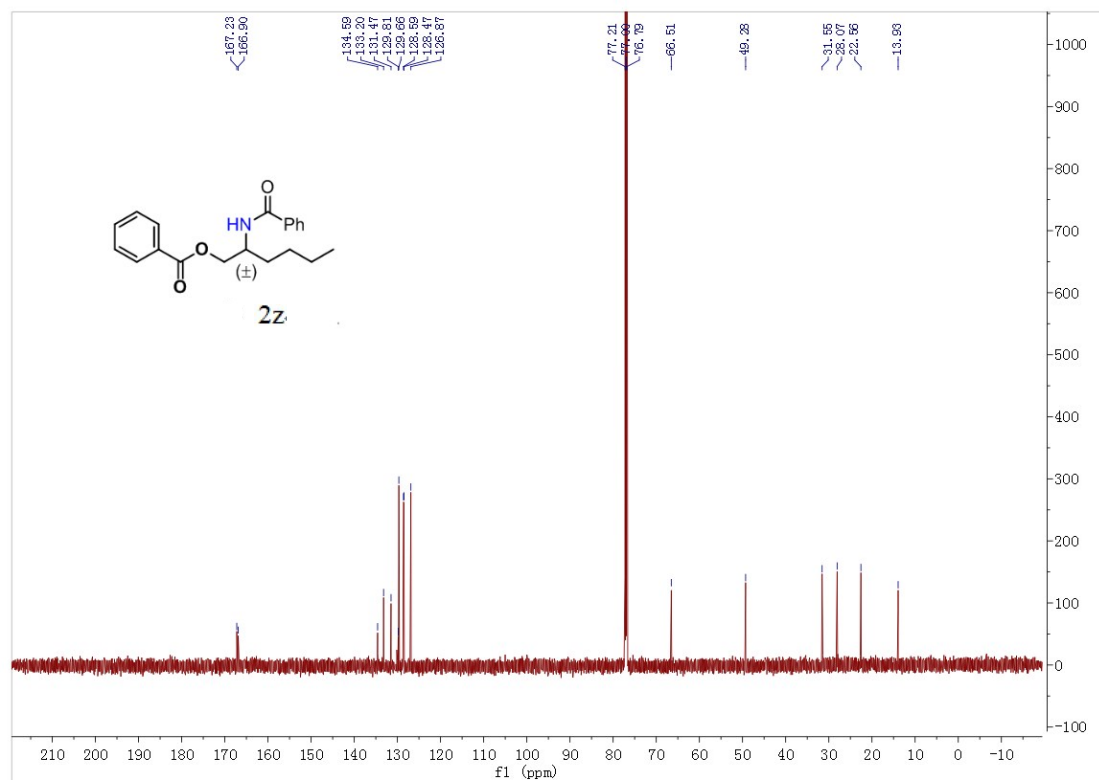



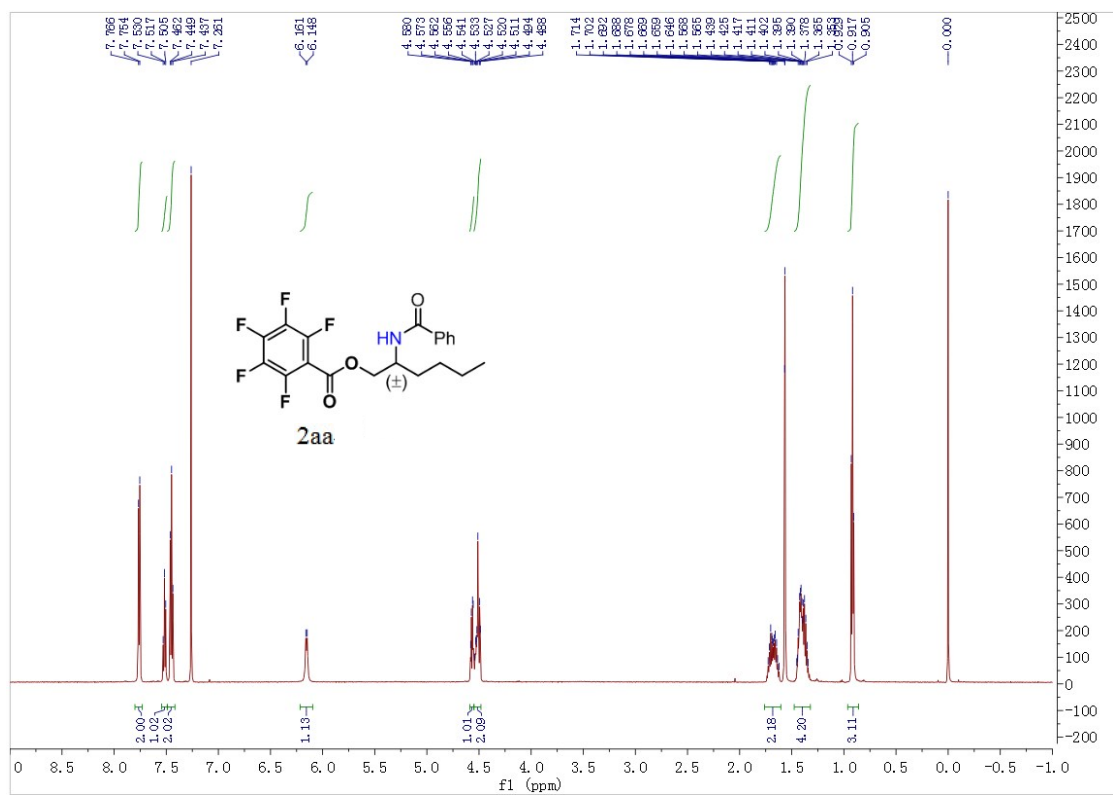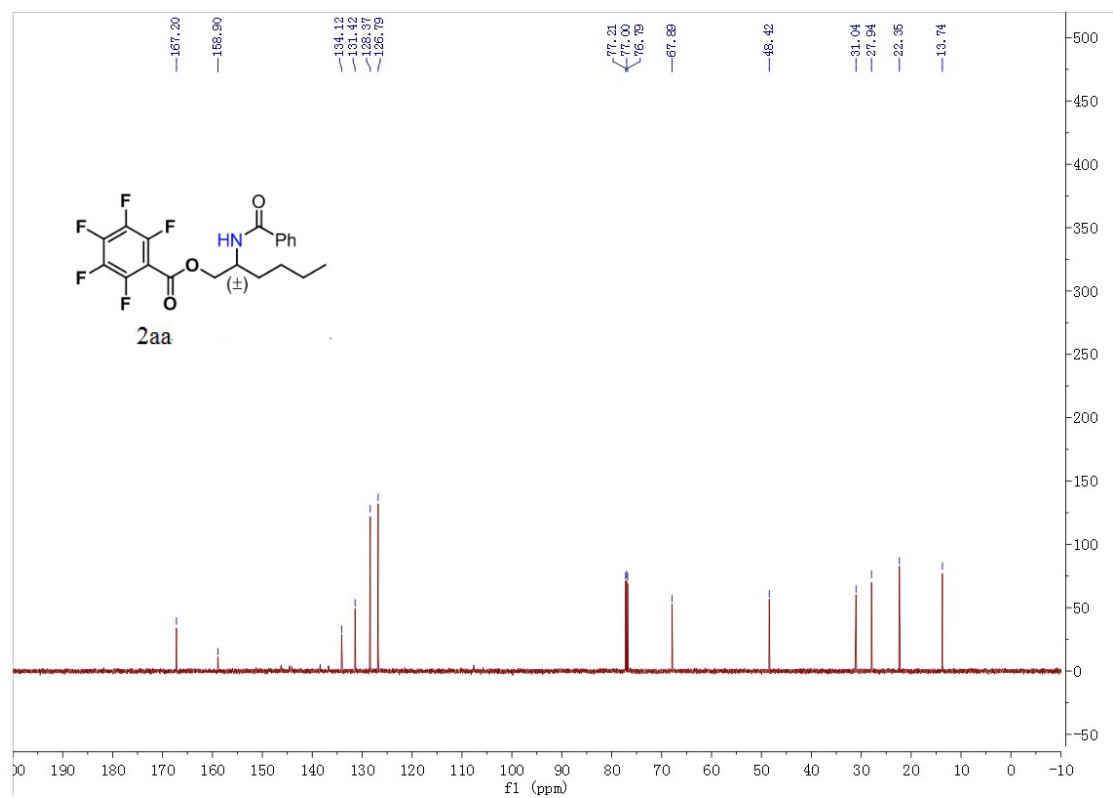

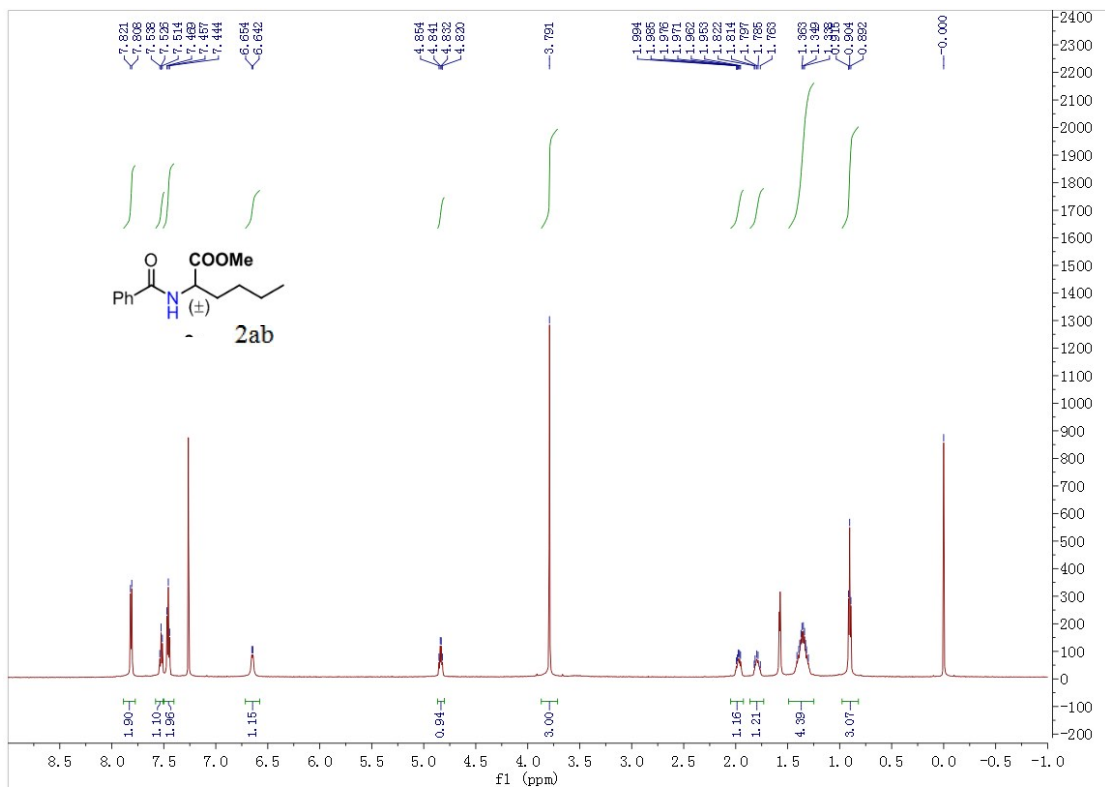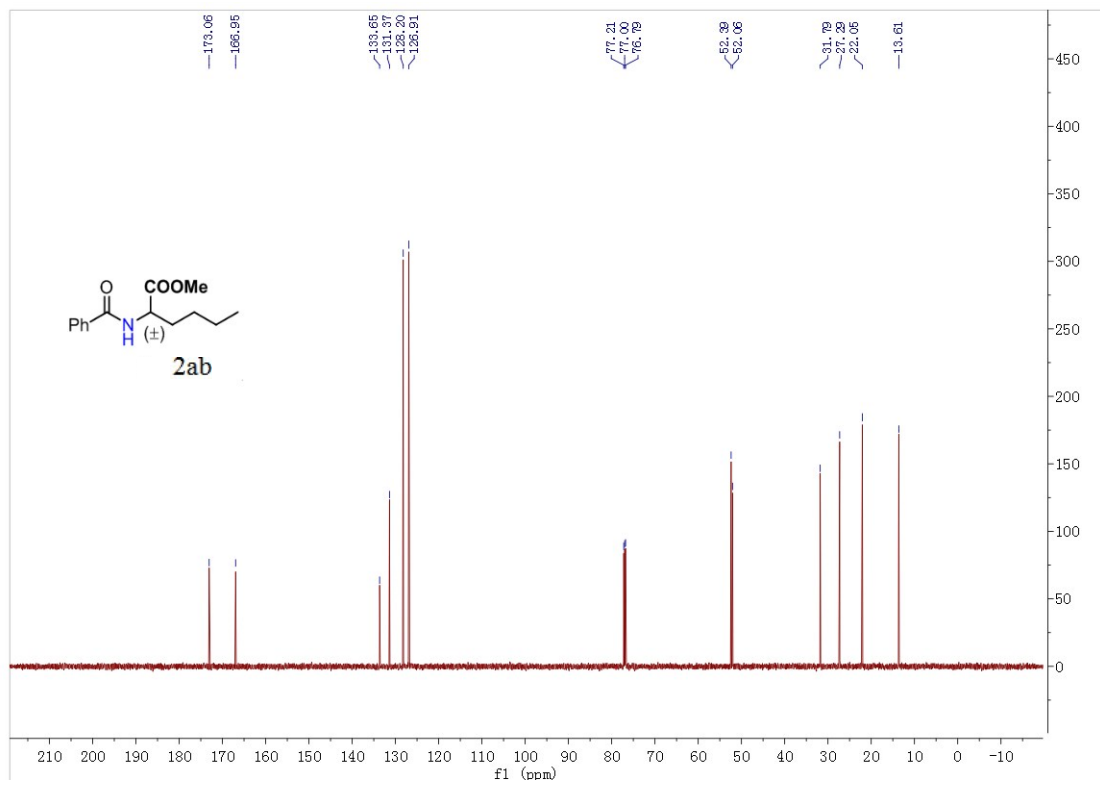

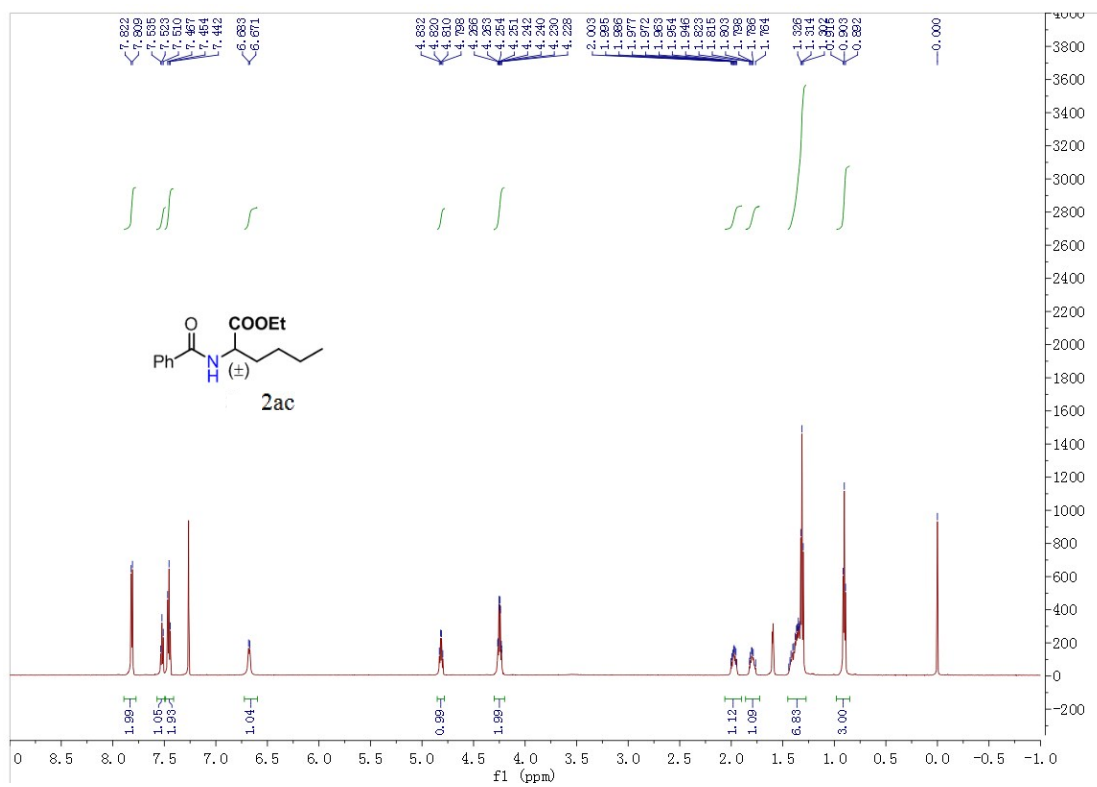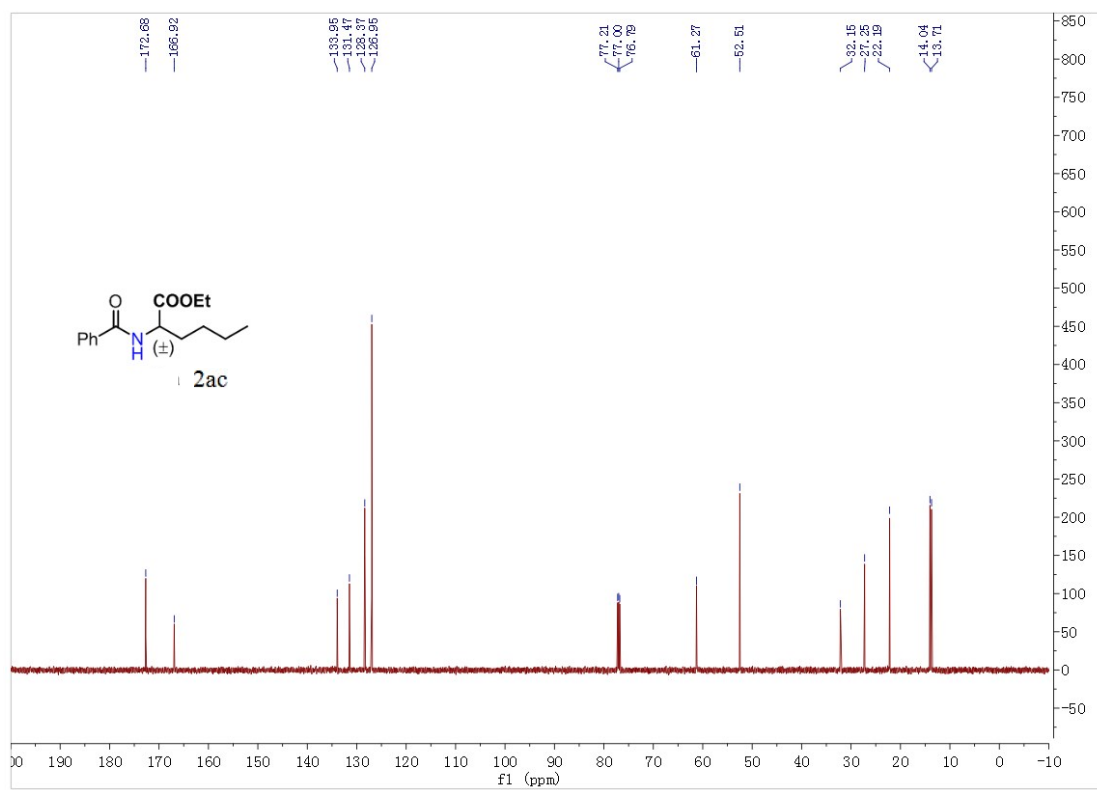

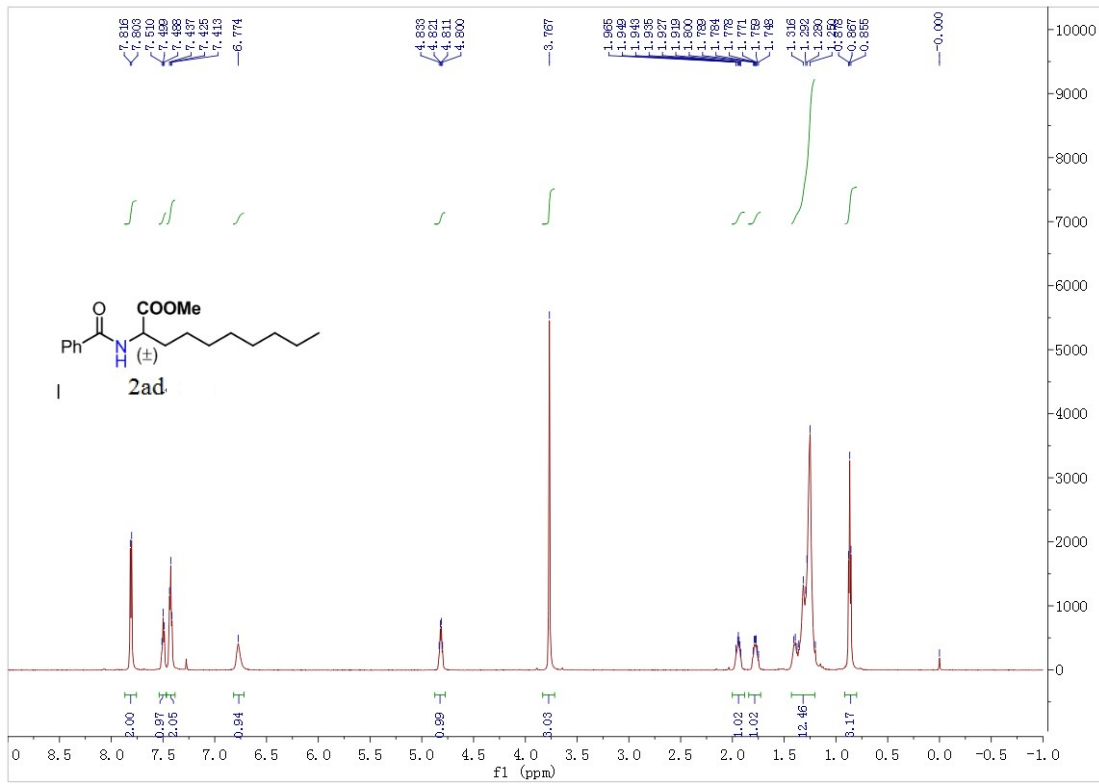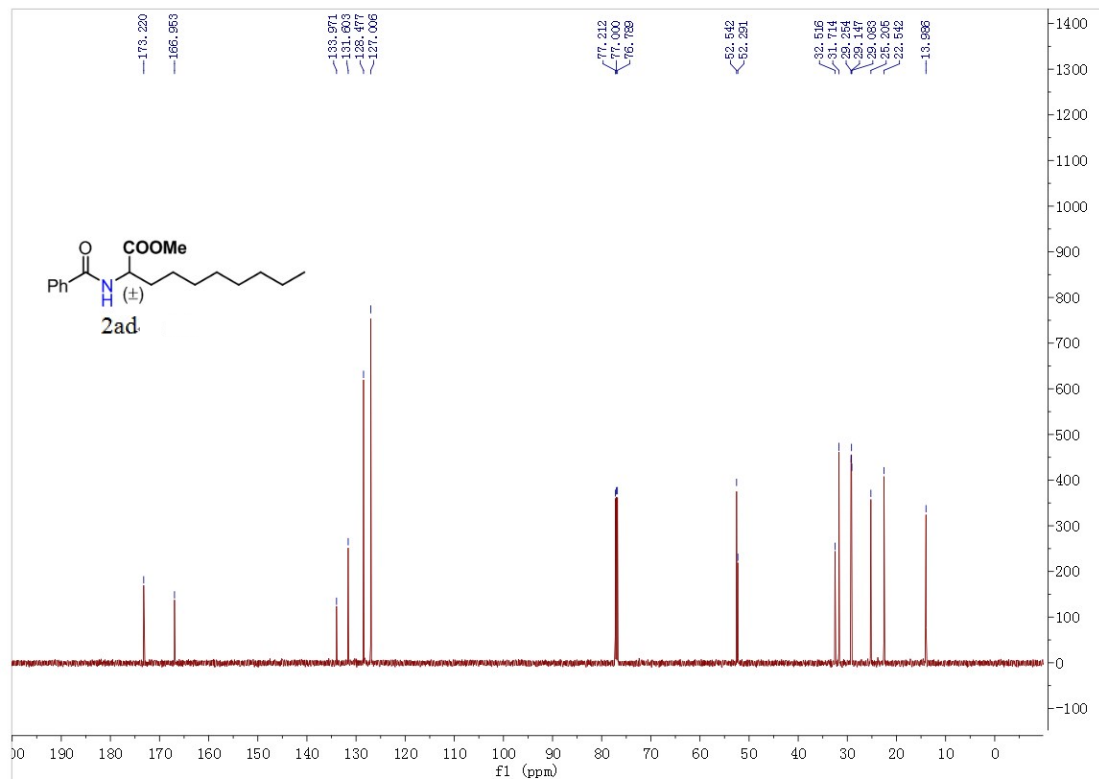

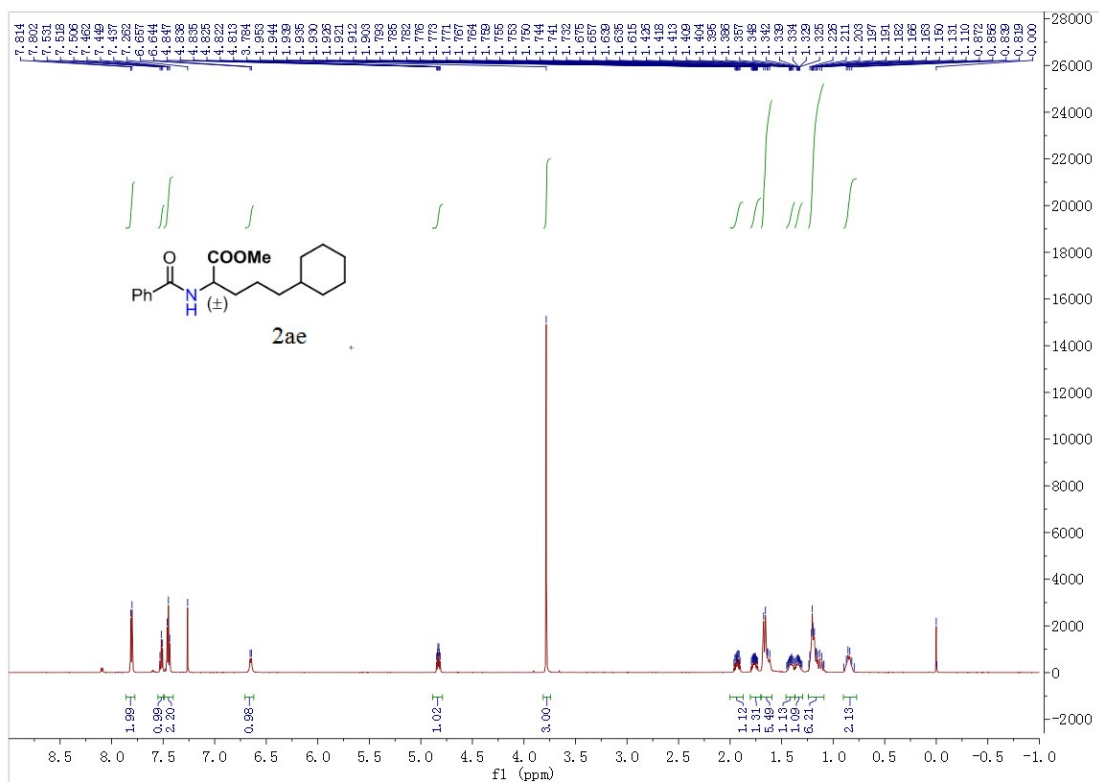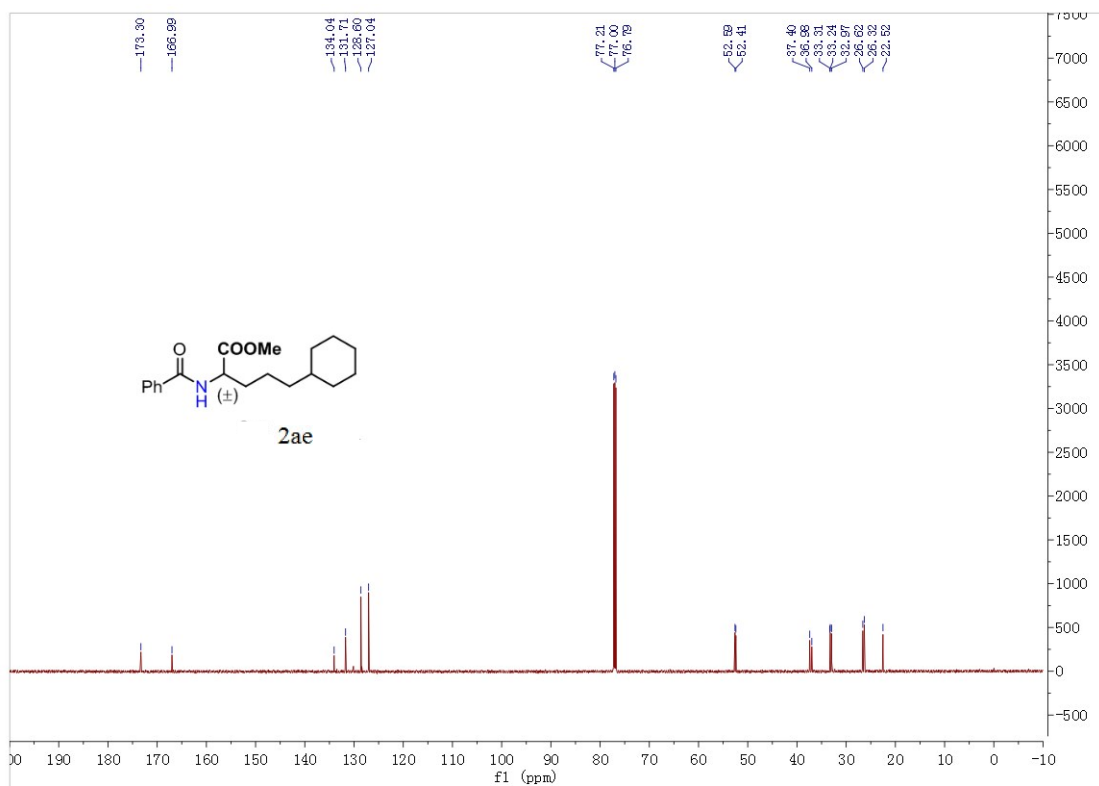

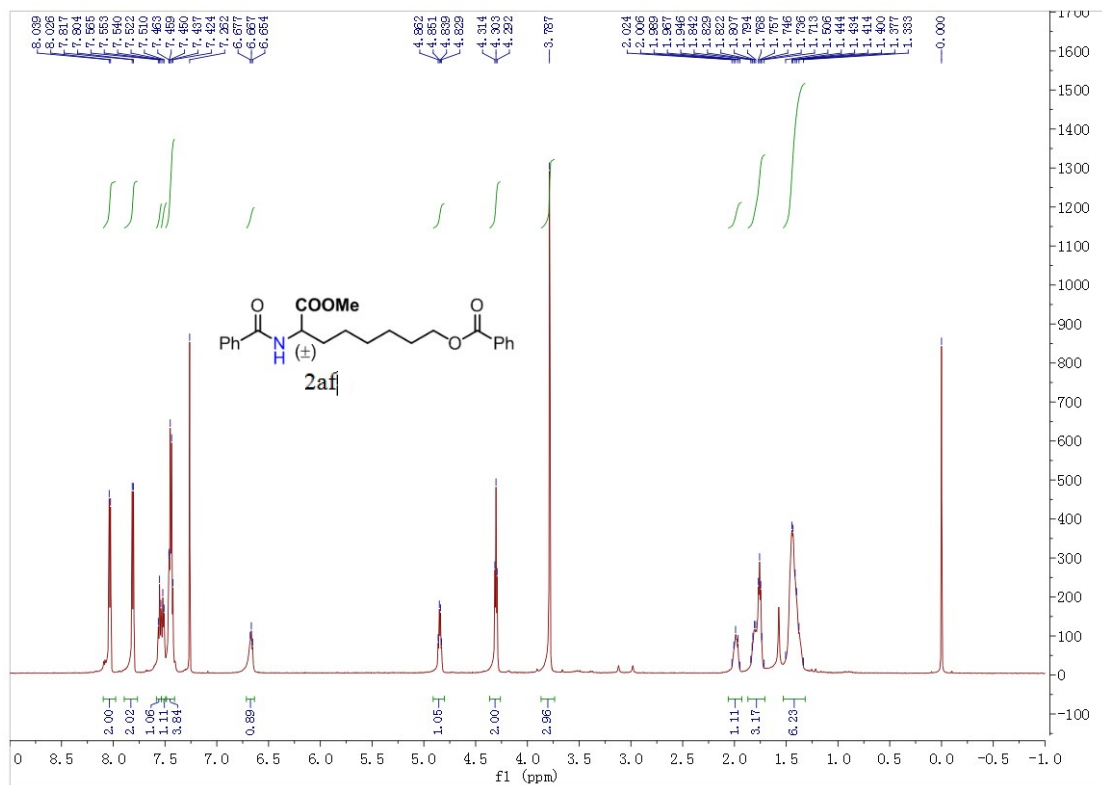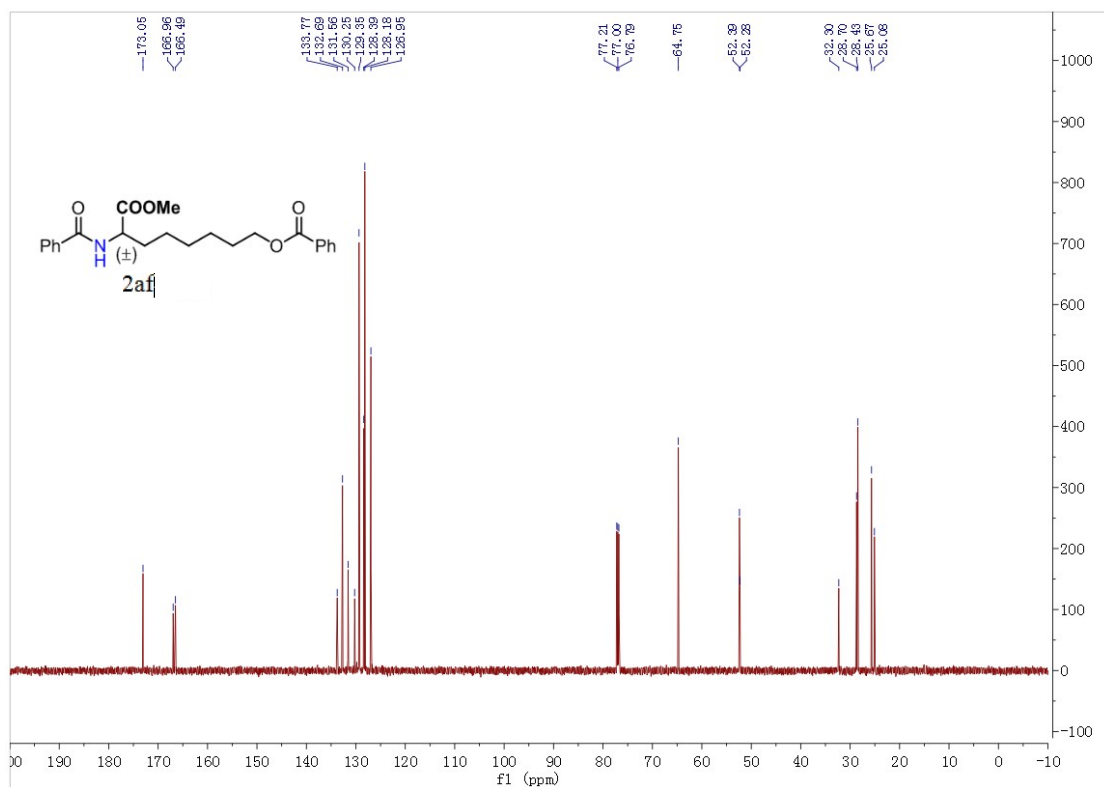

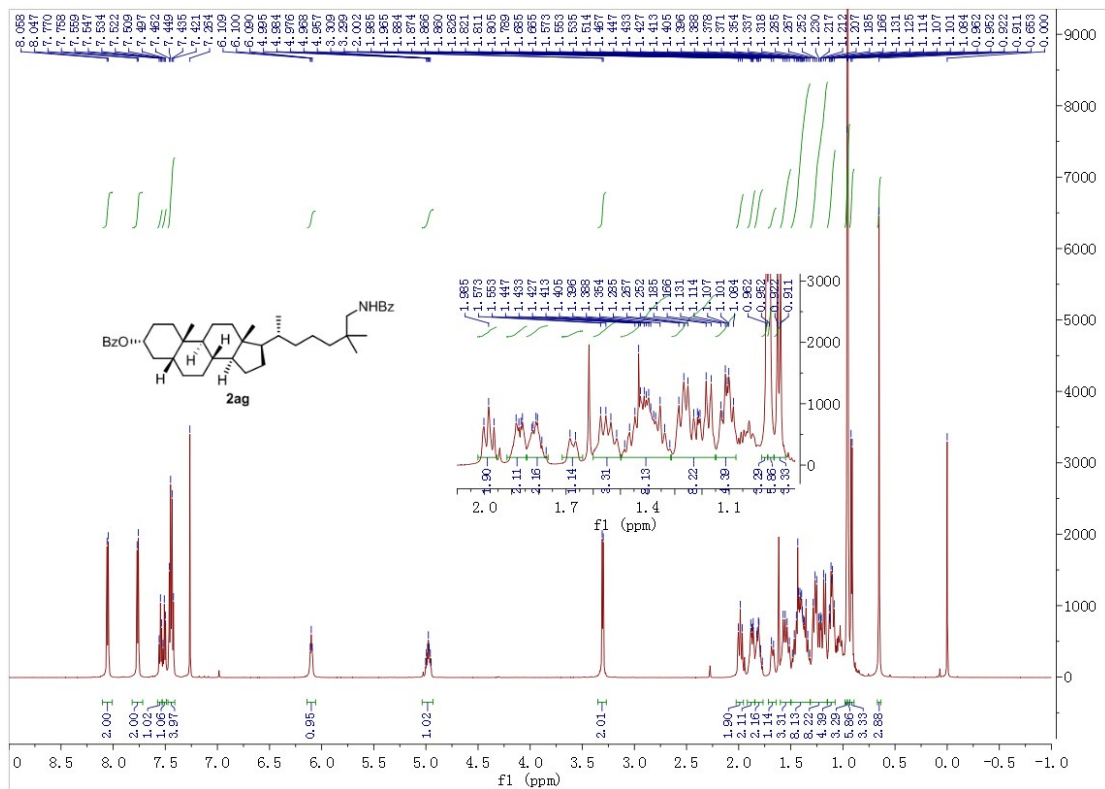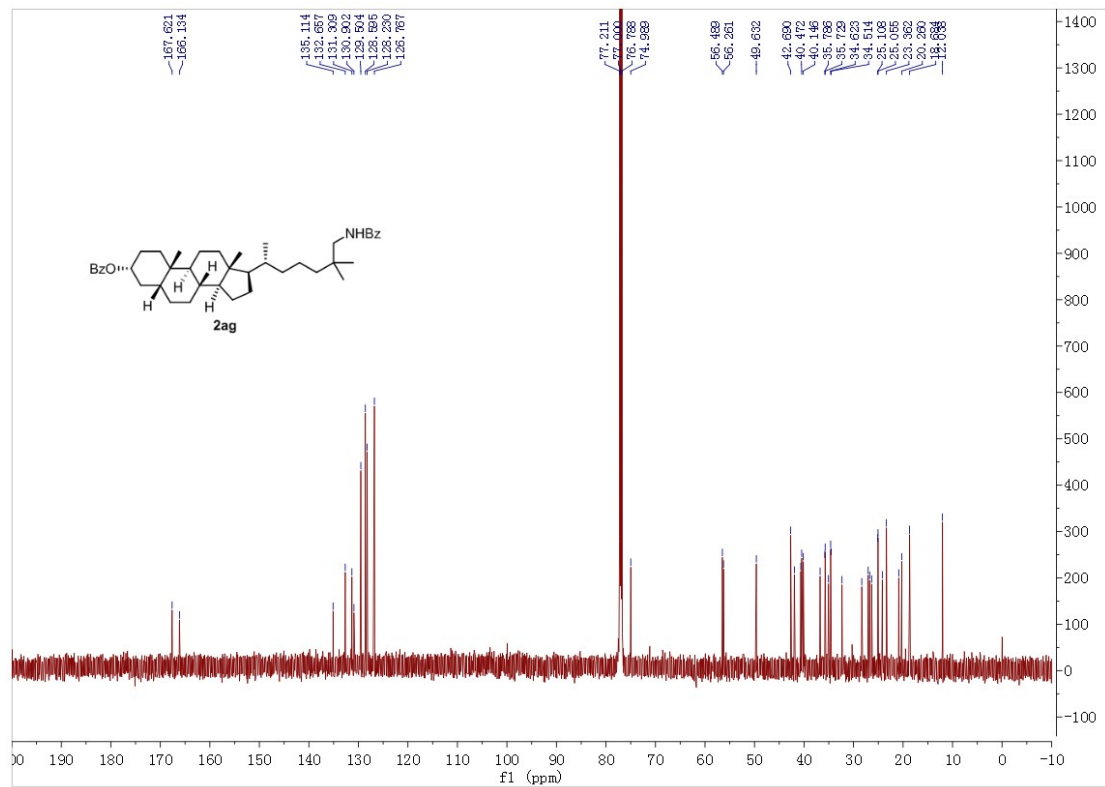

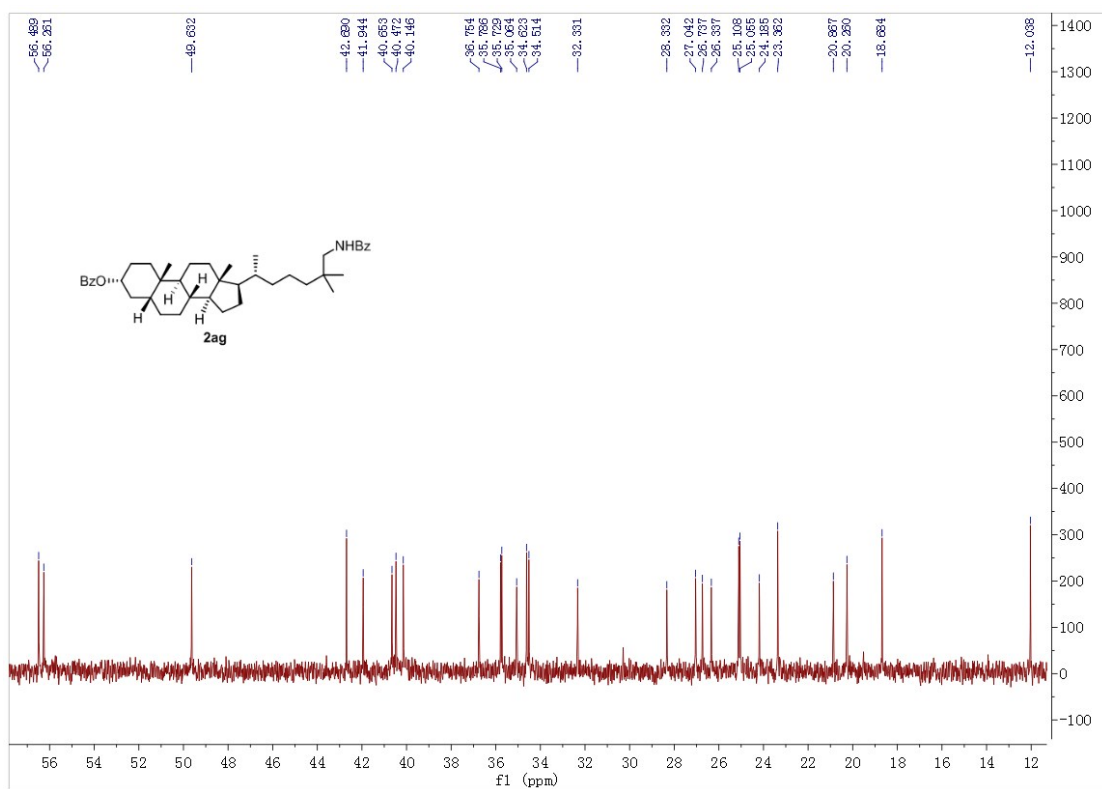



### Spectra of product:

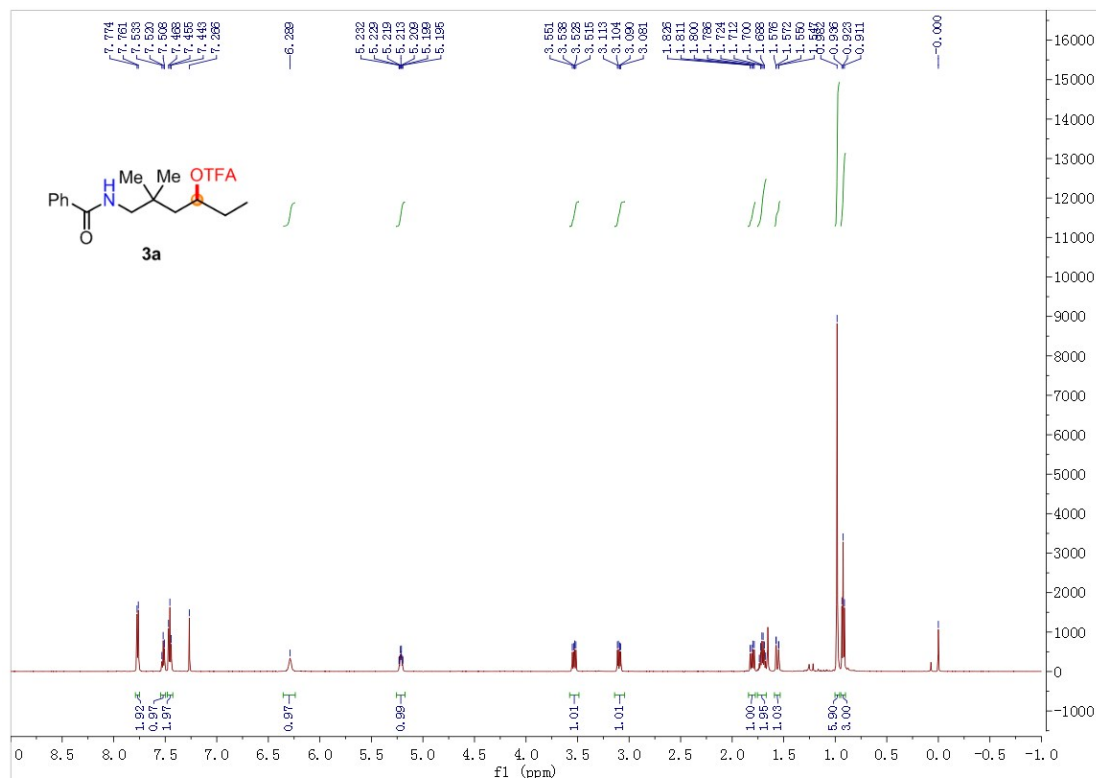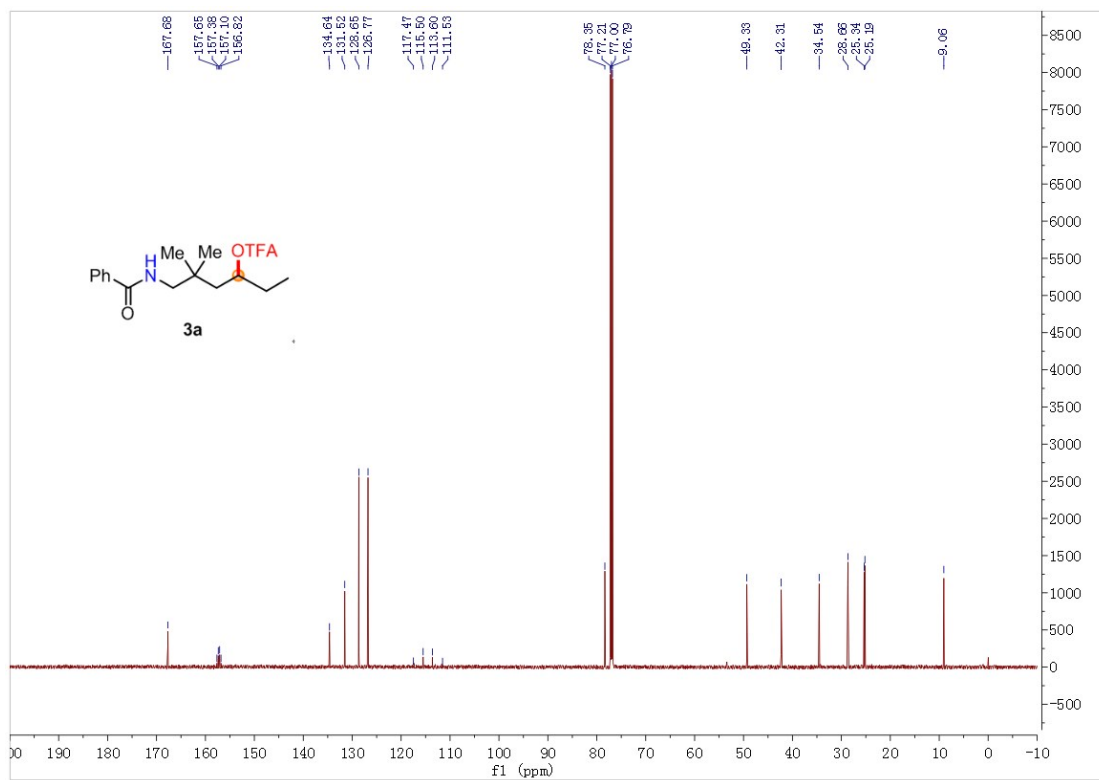

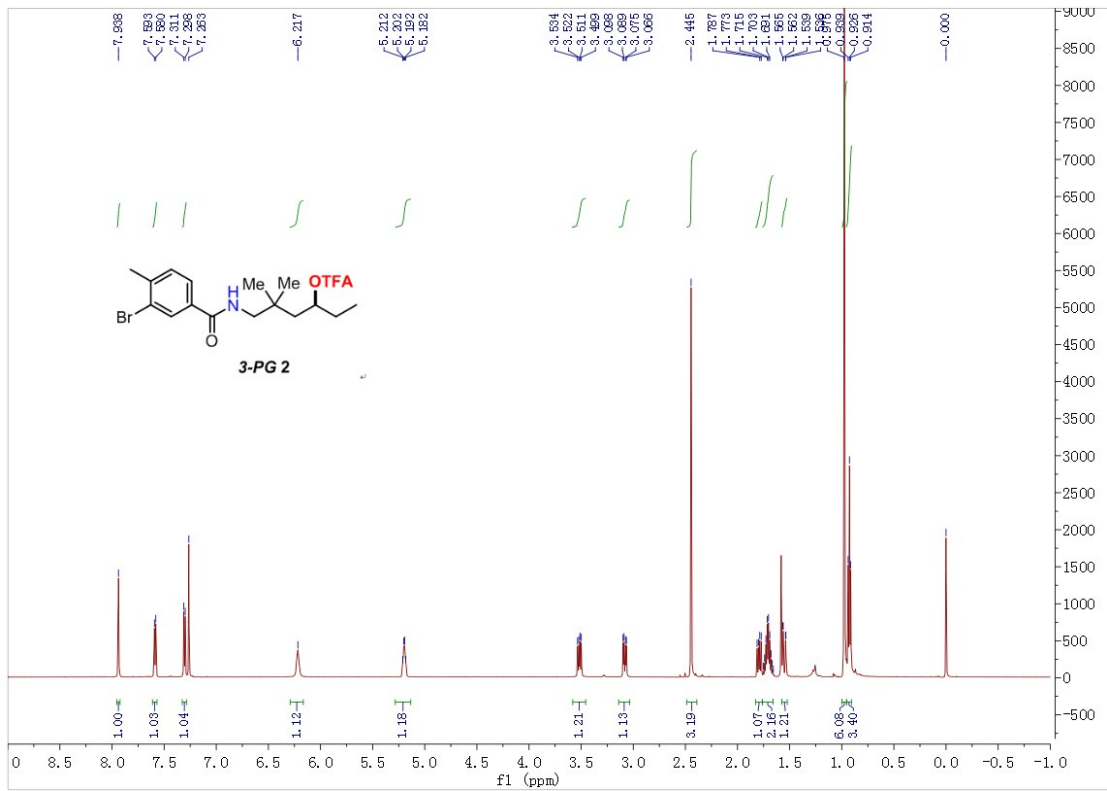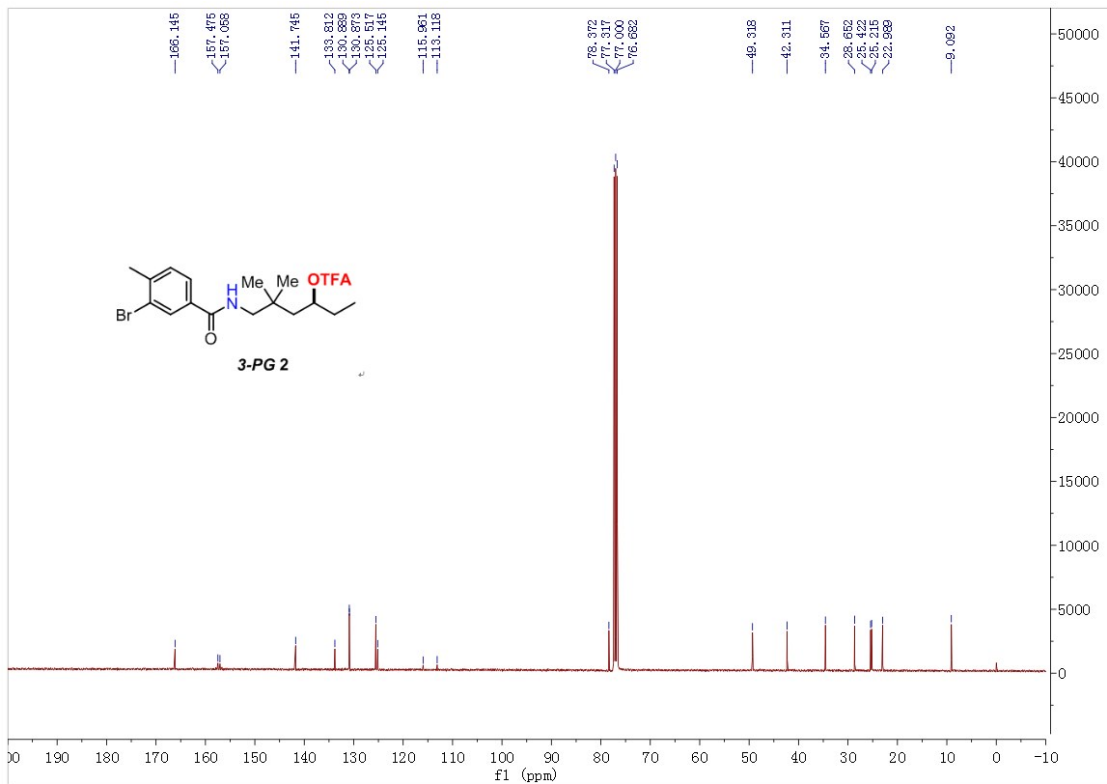

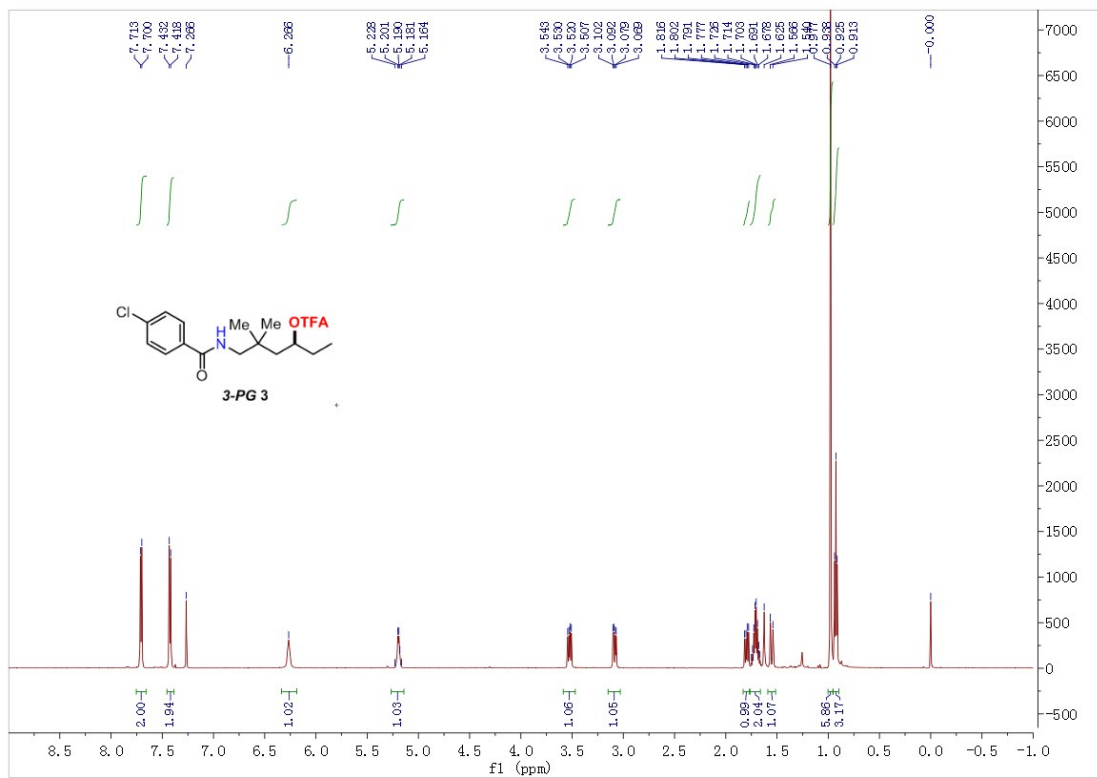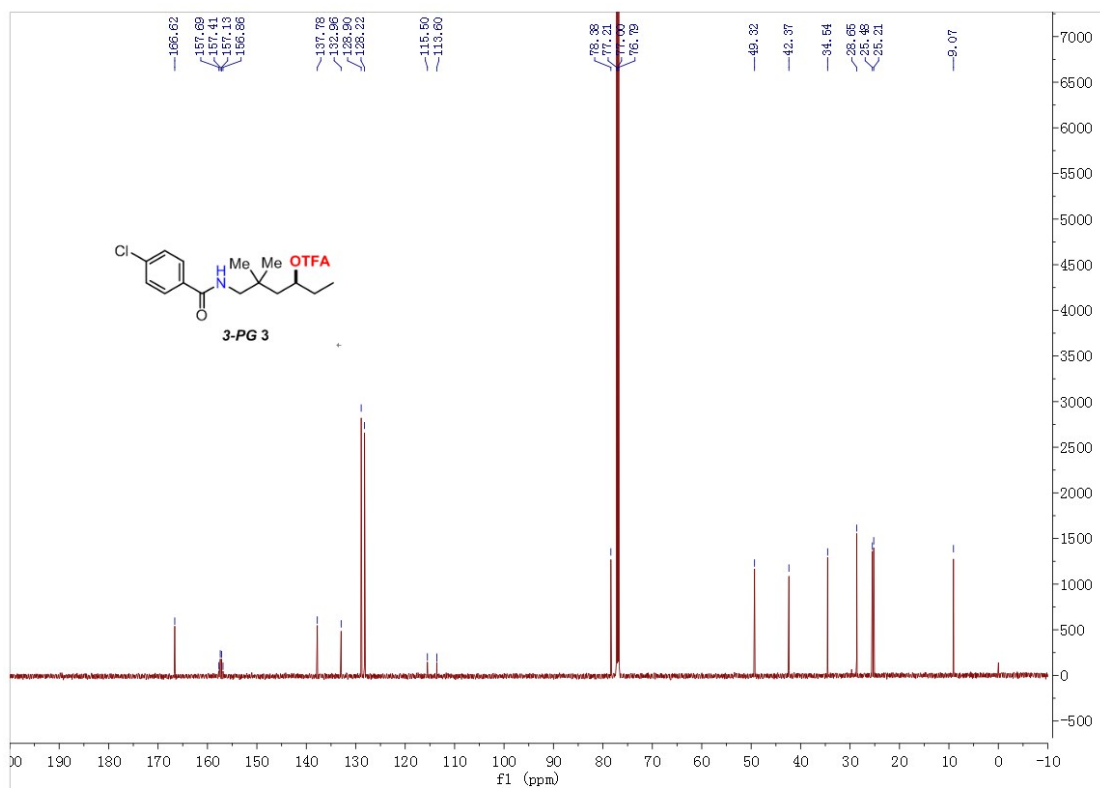

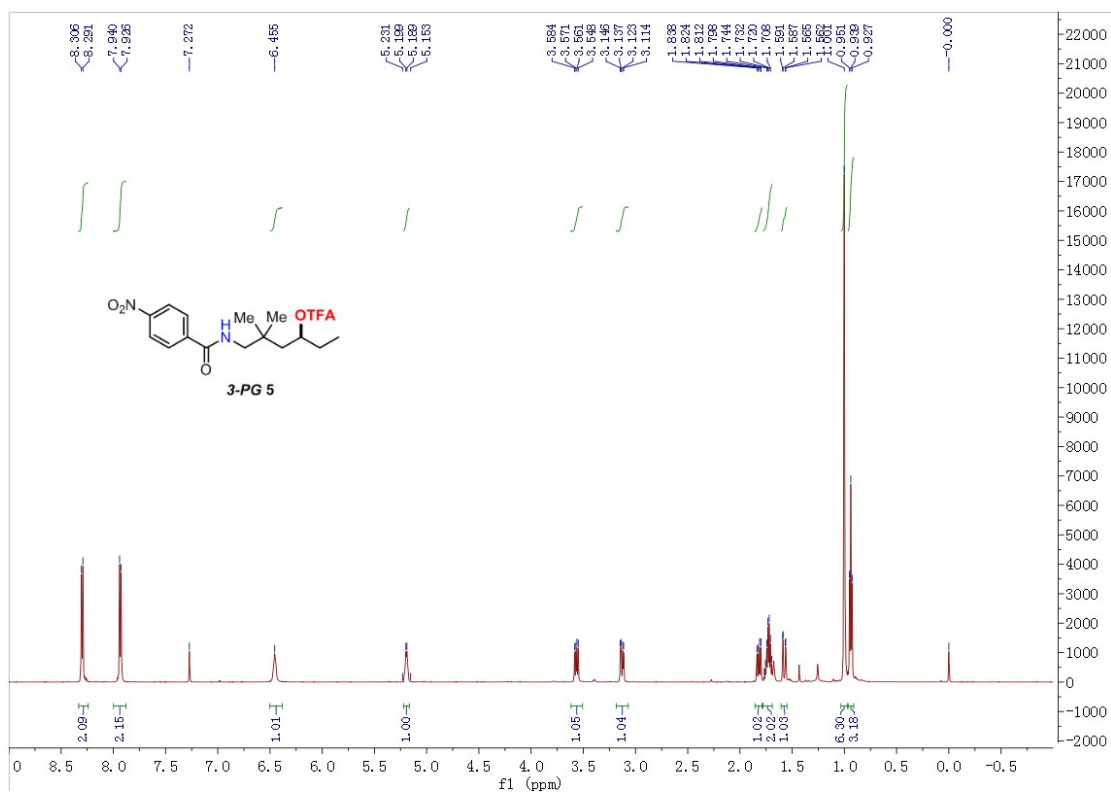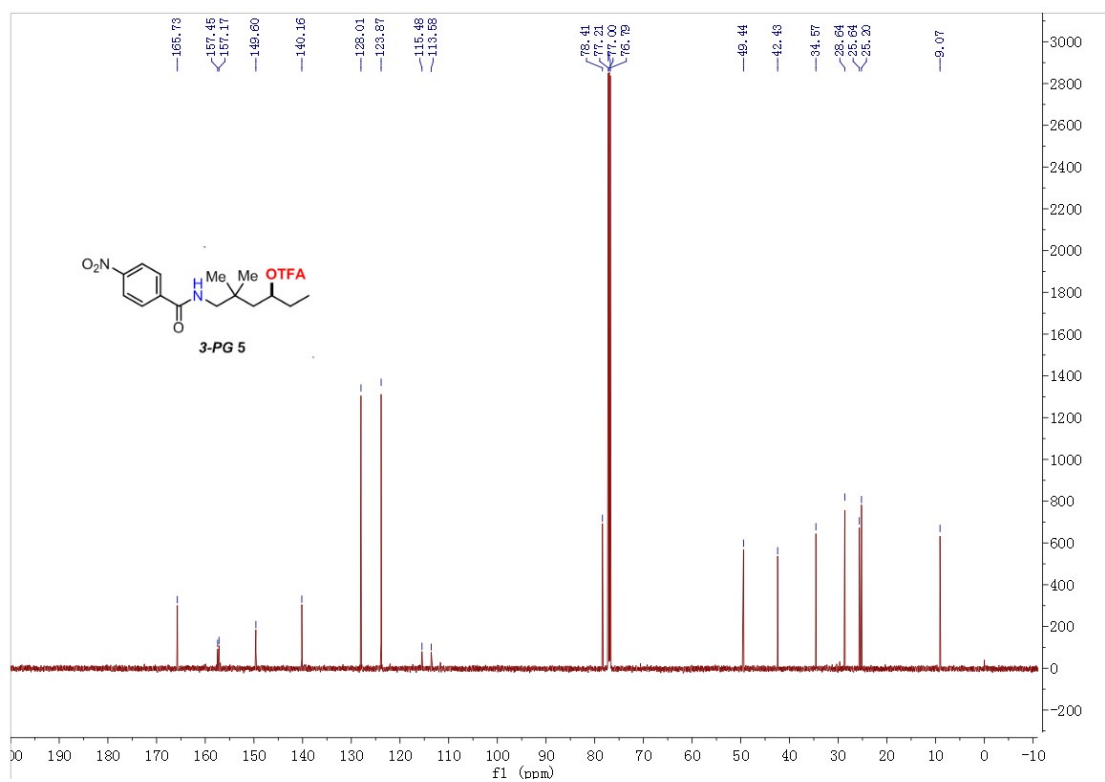

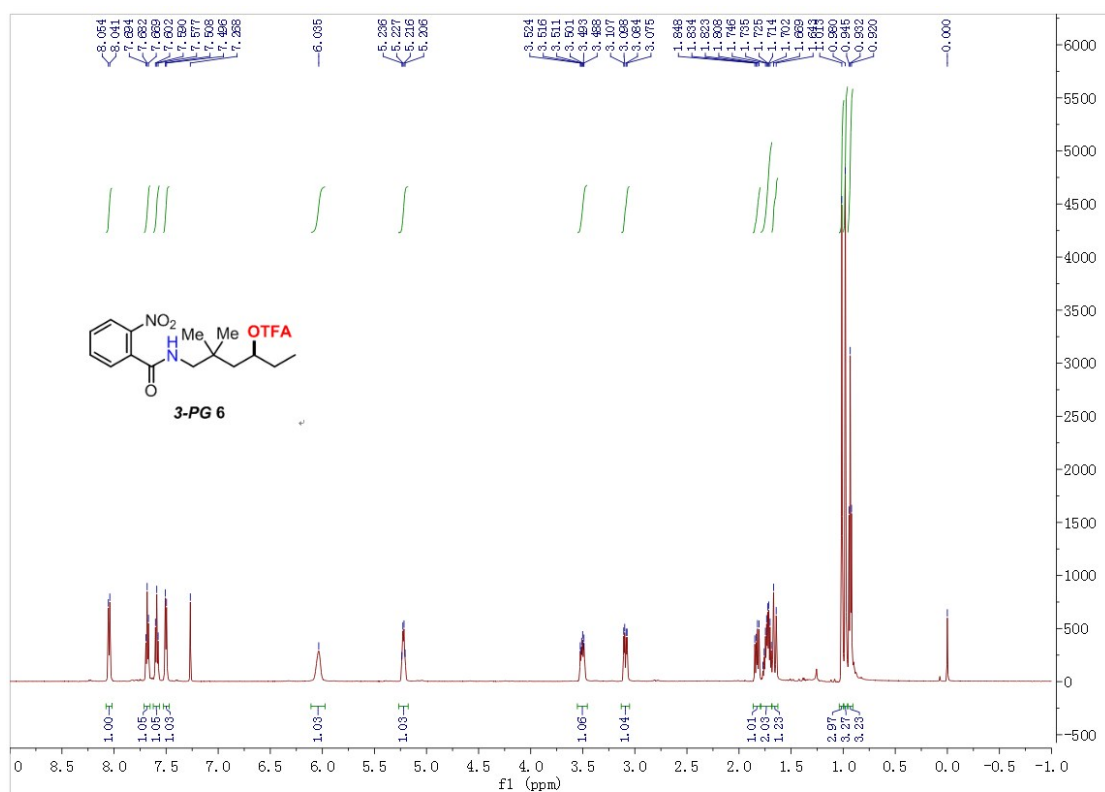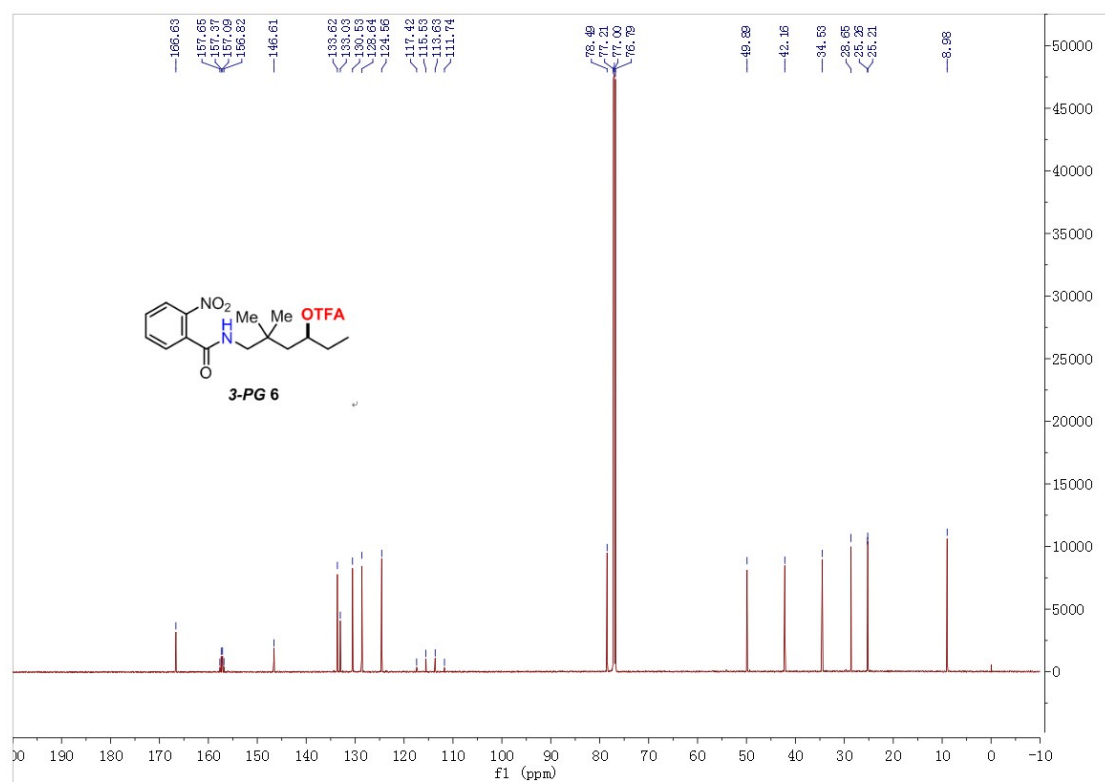

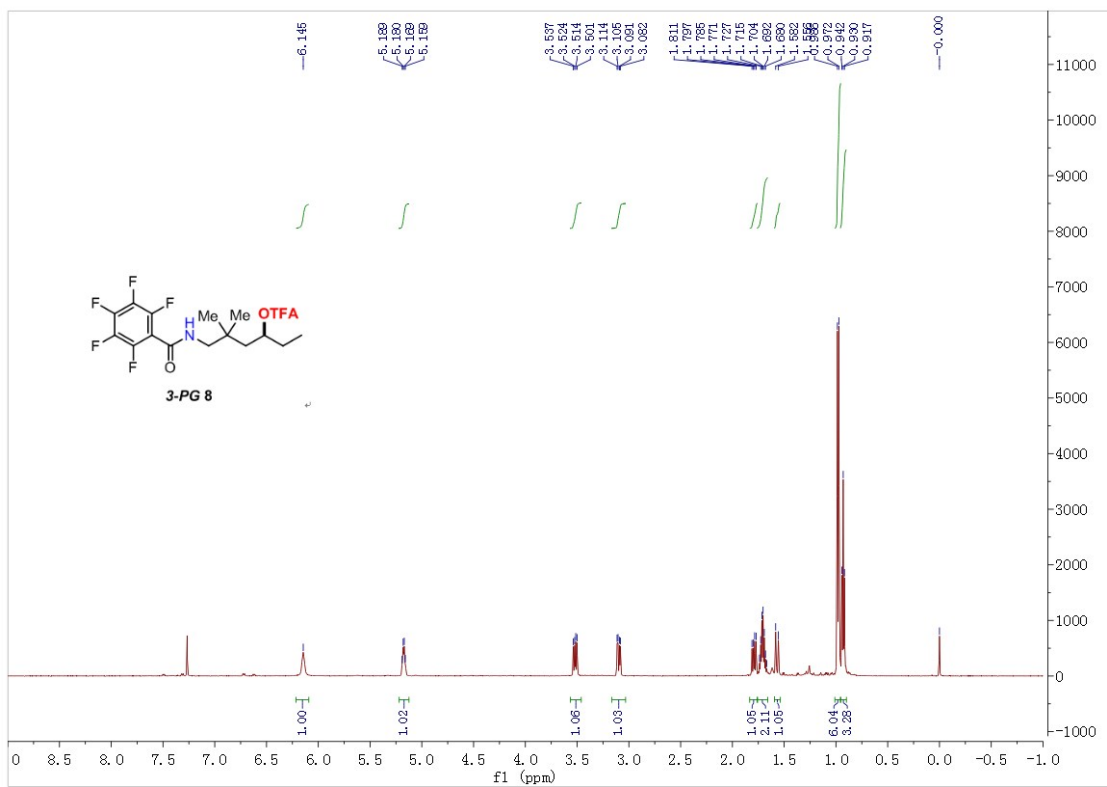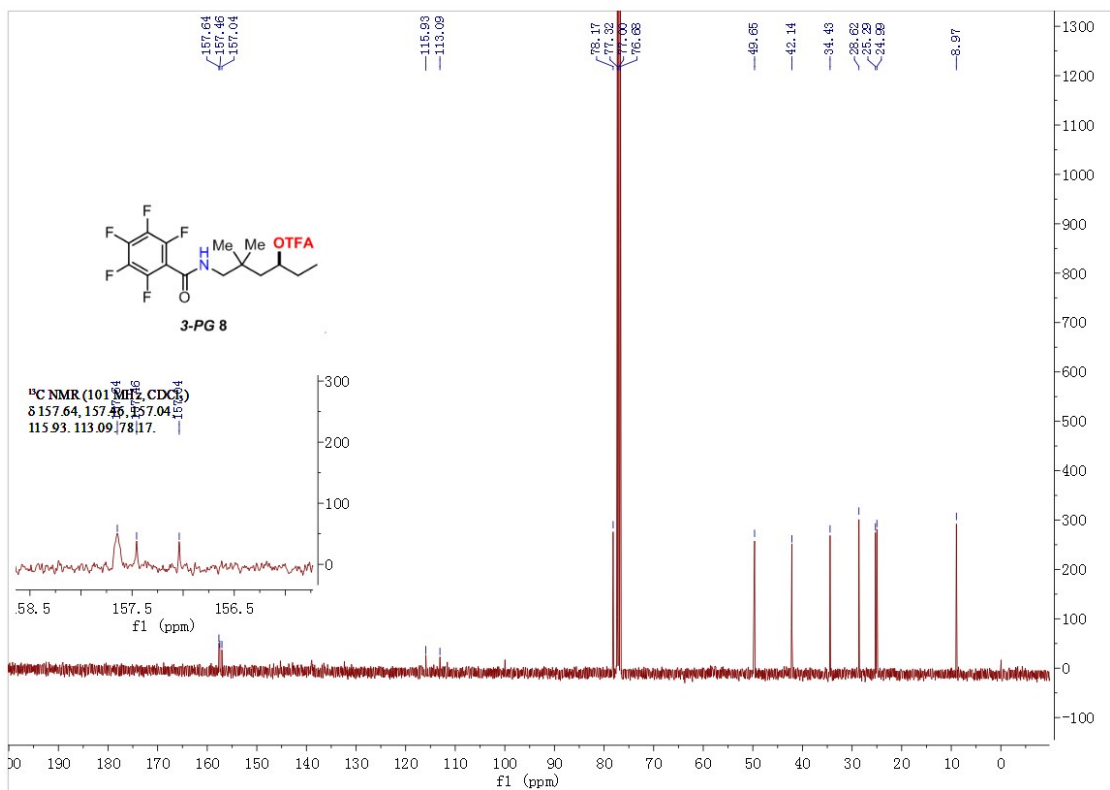

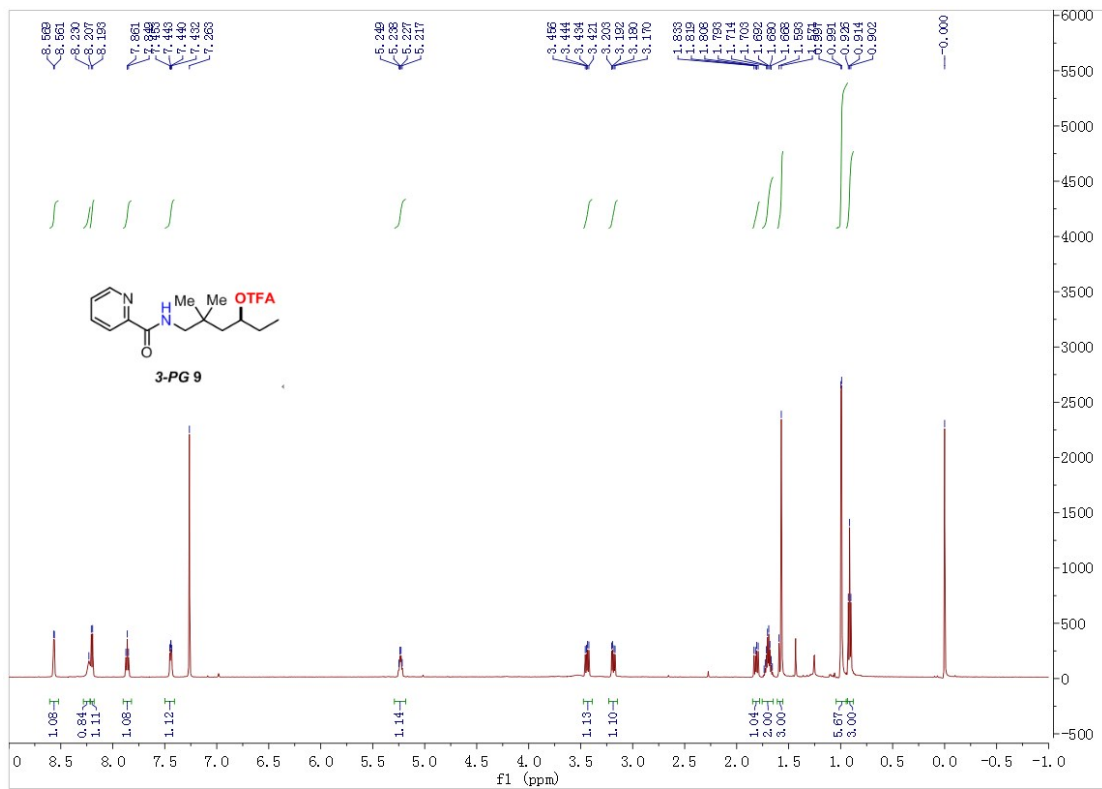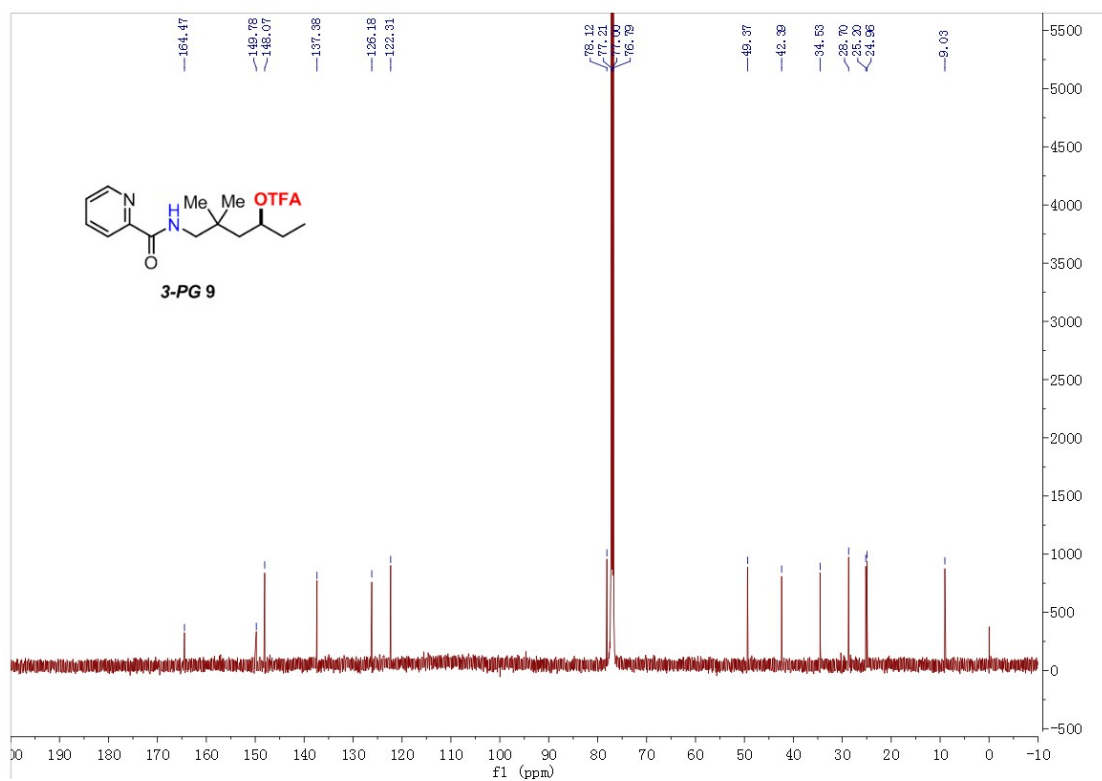

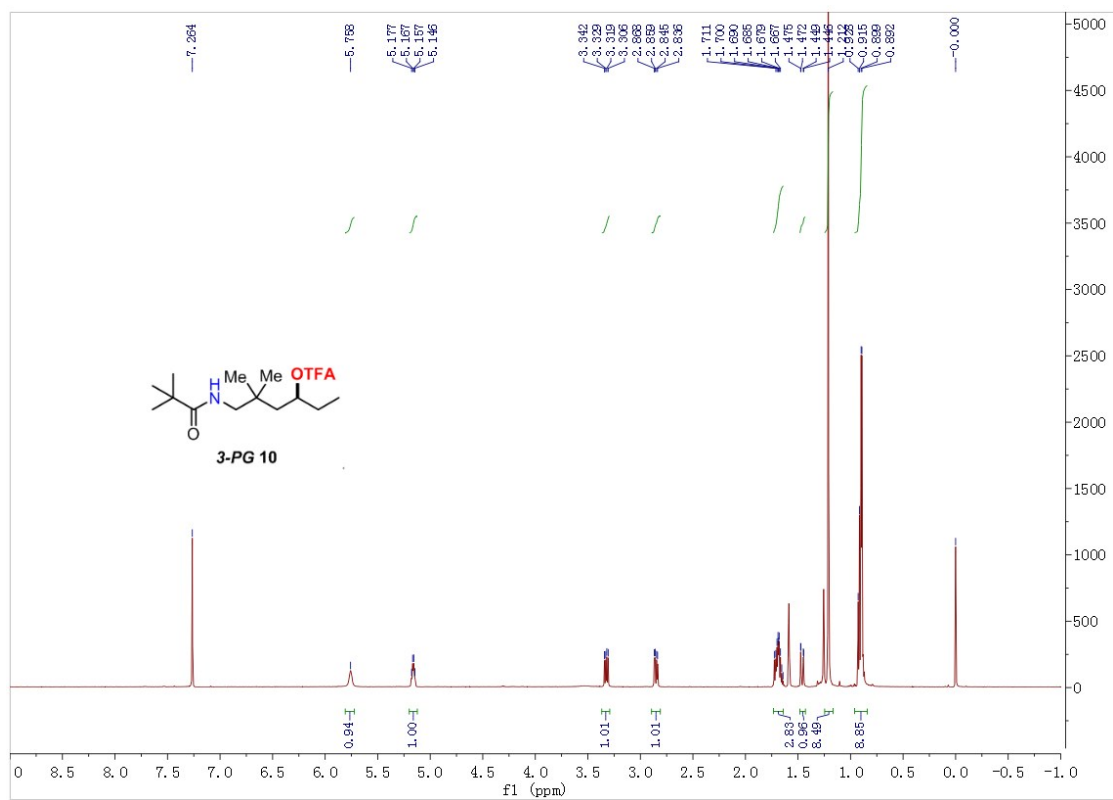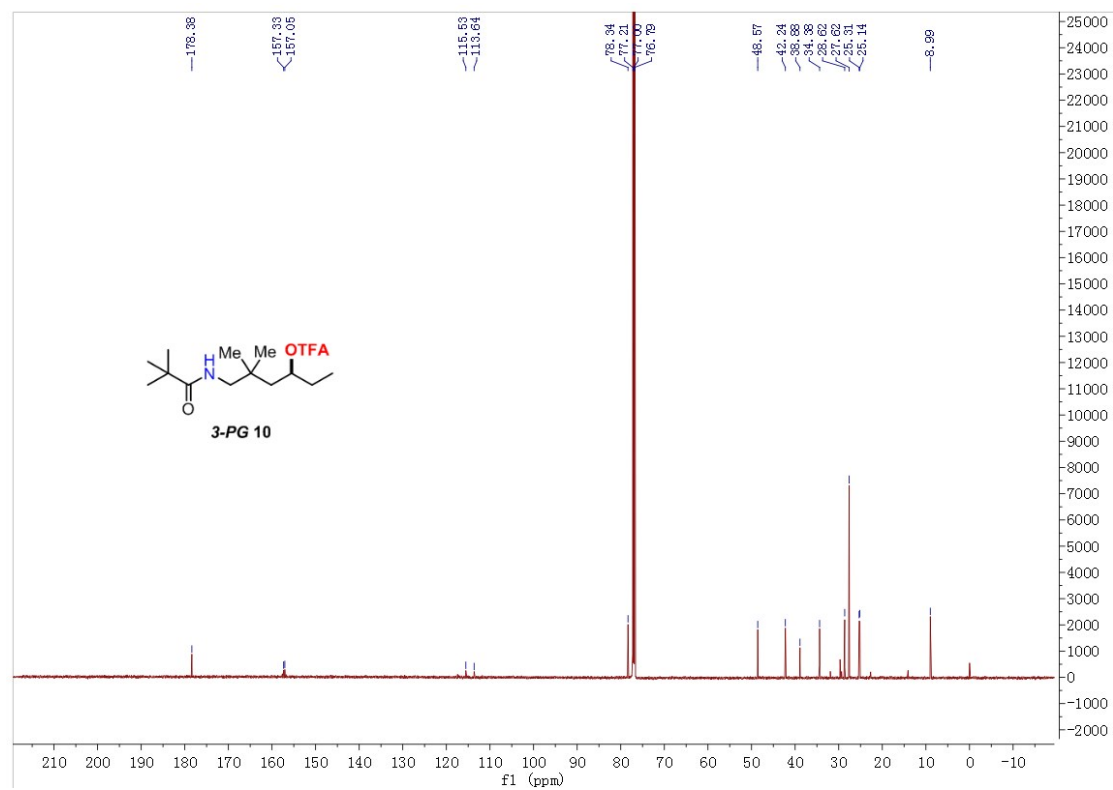



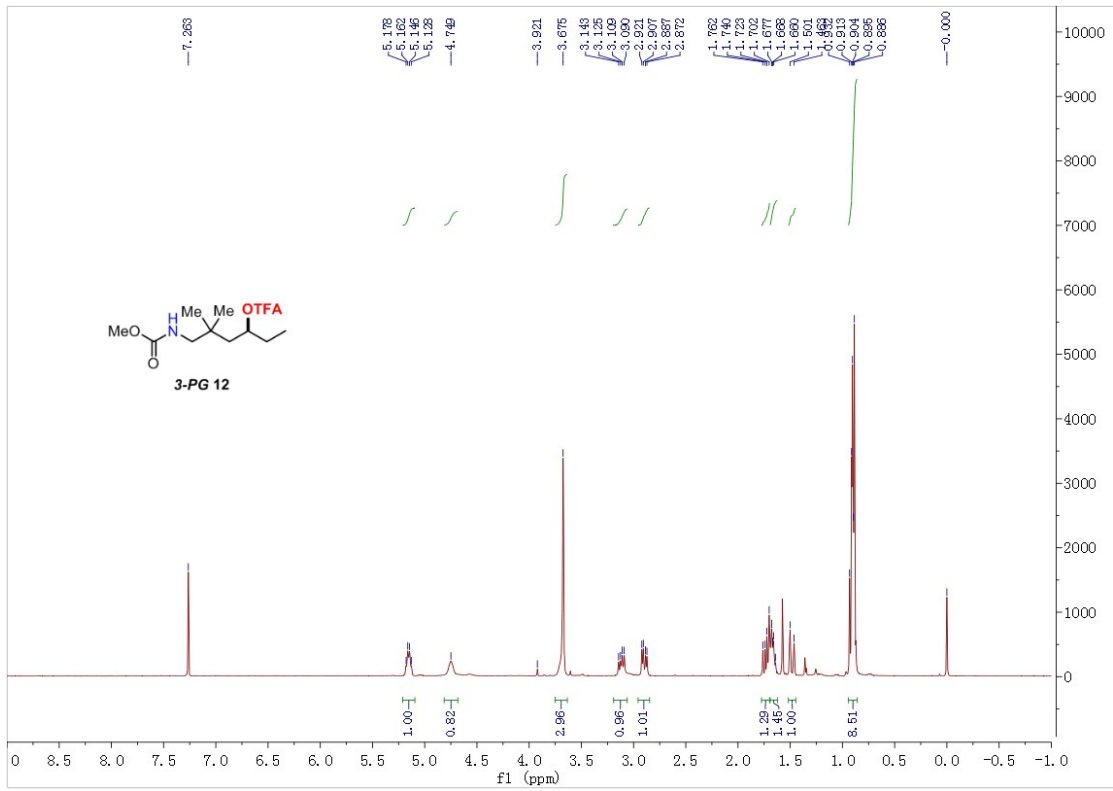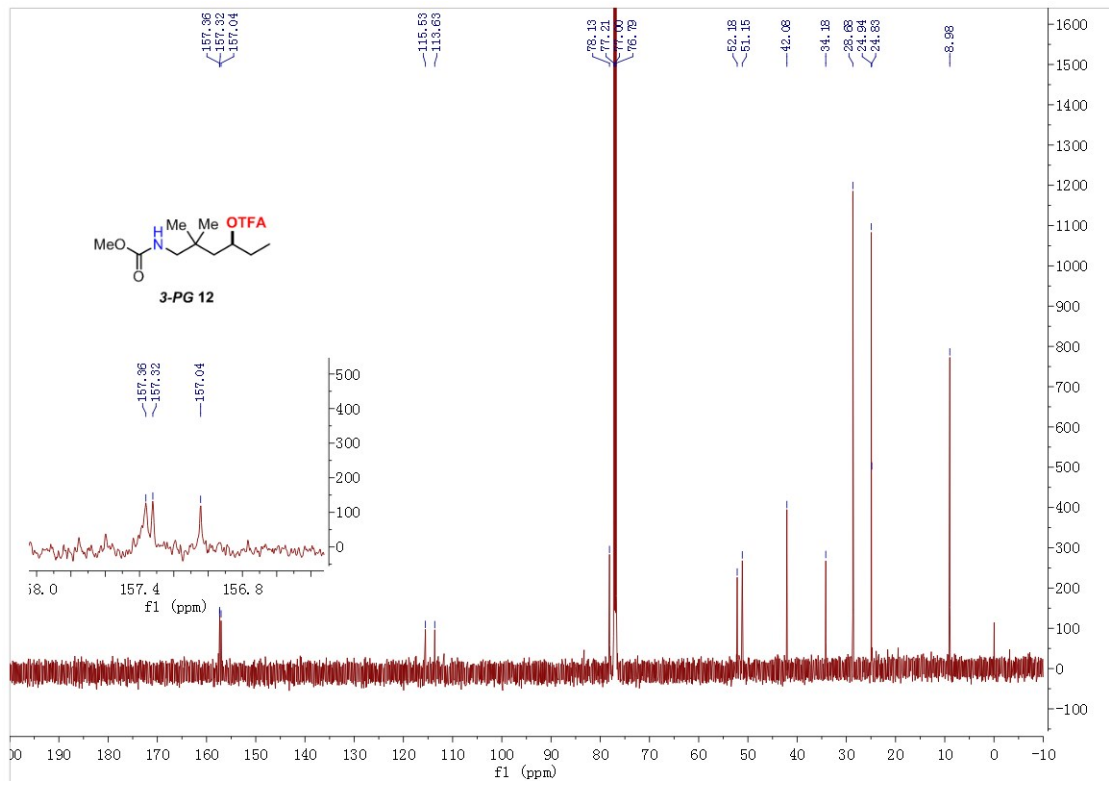

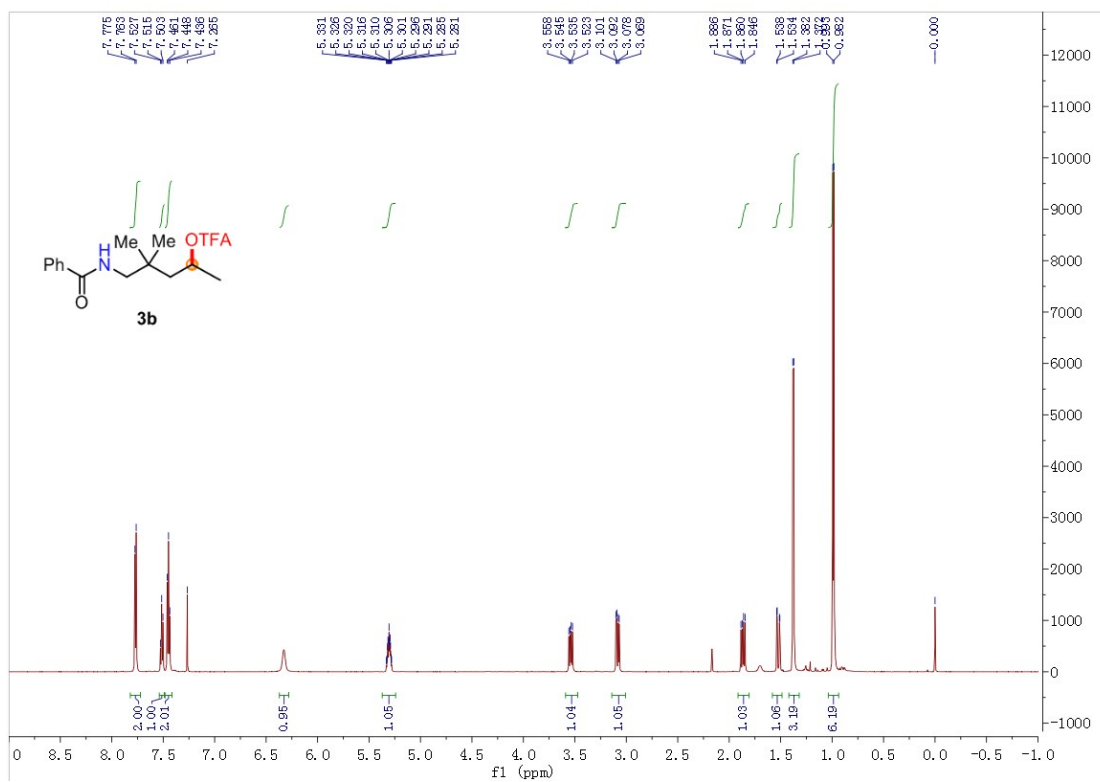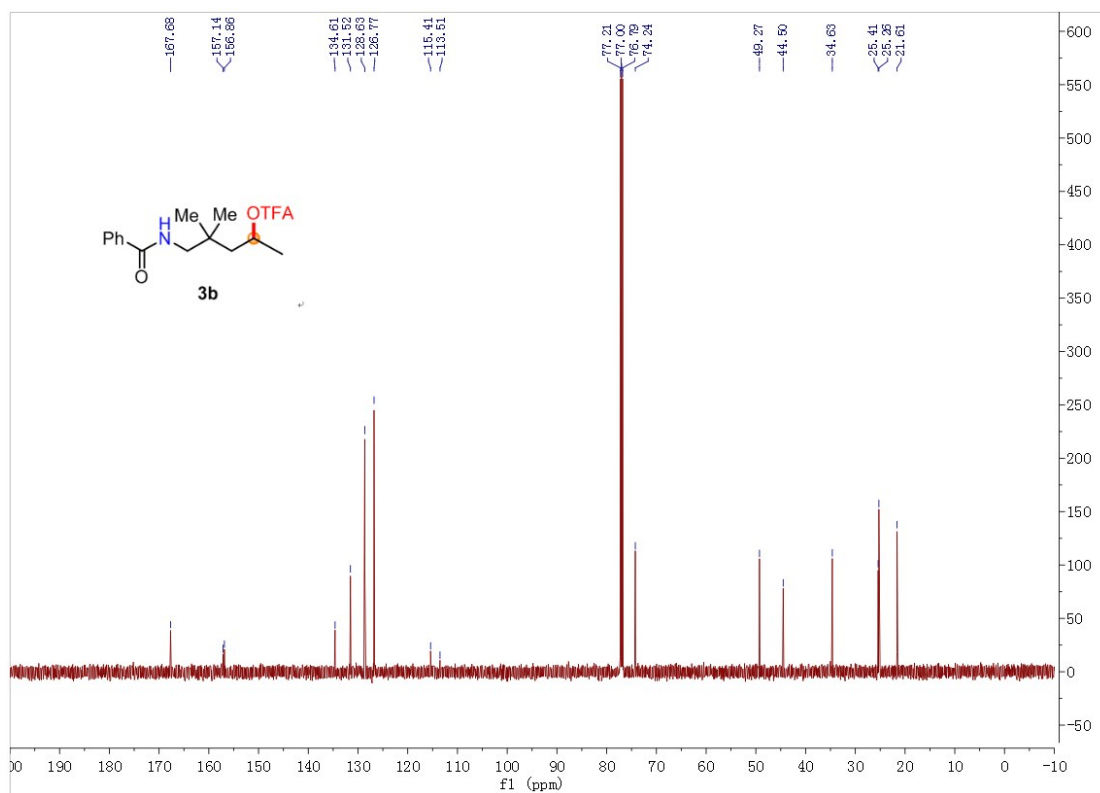

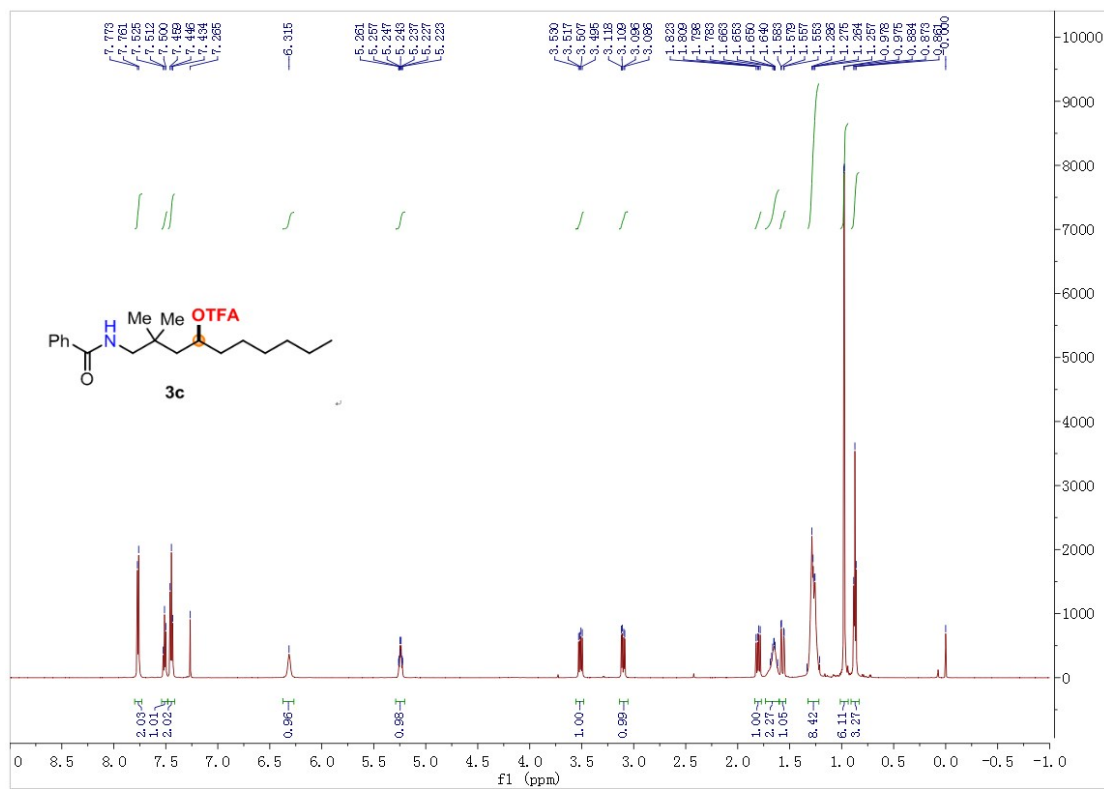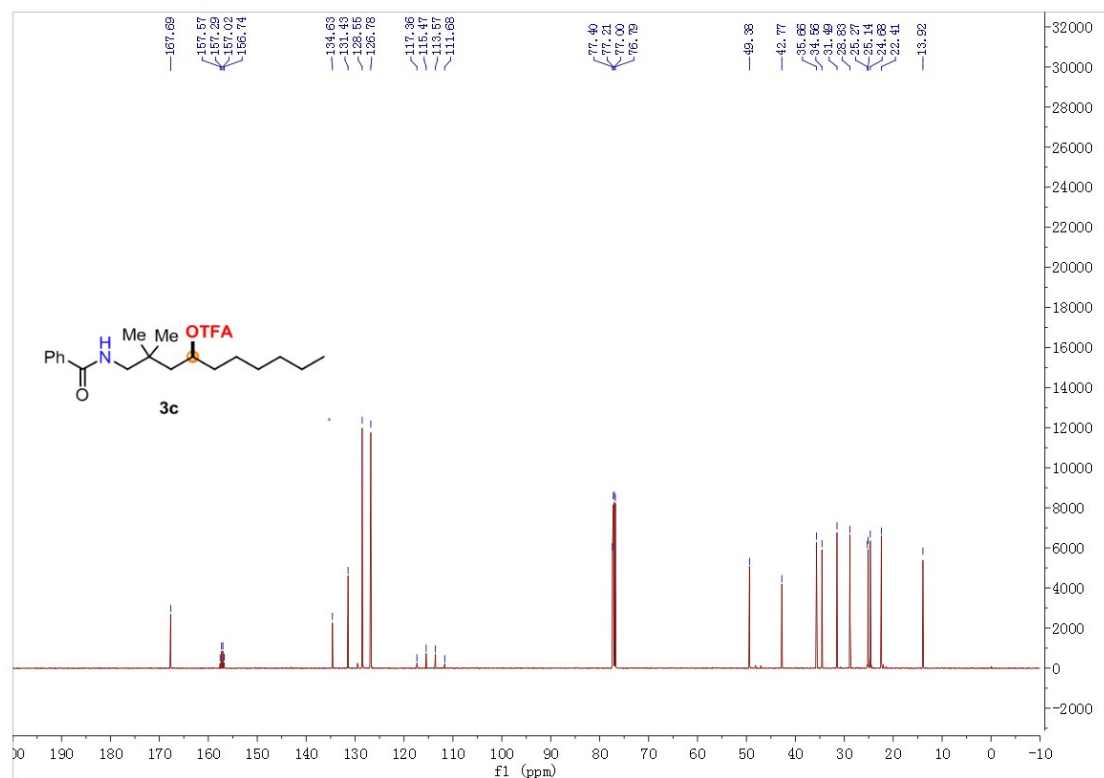

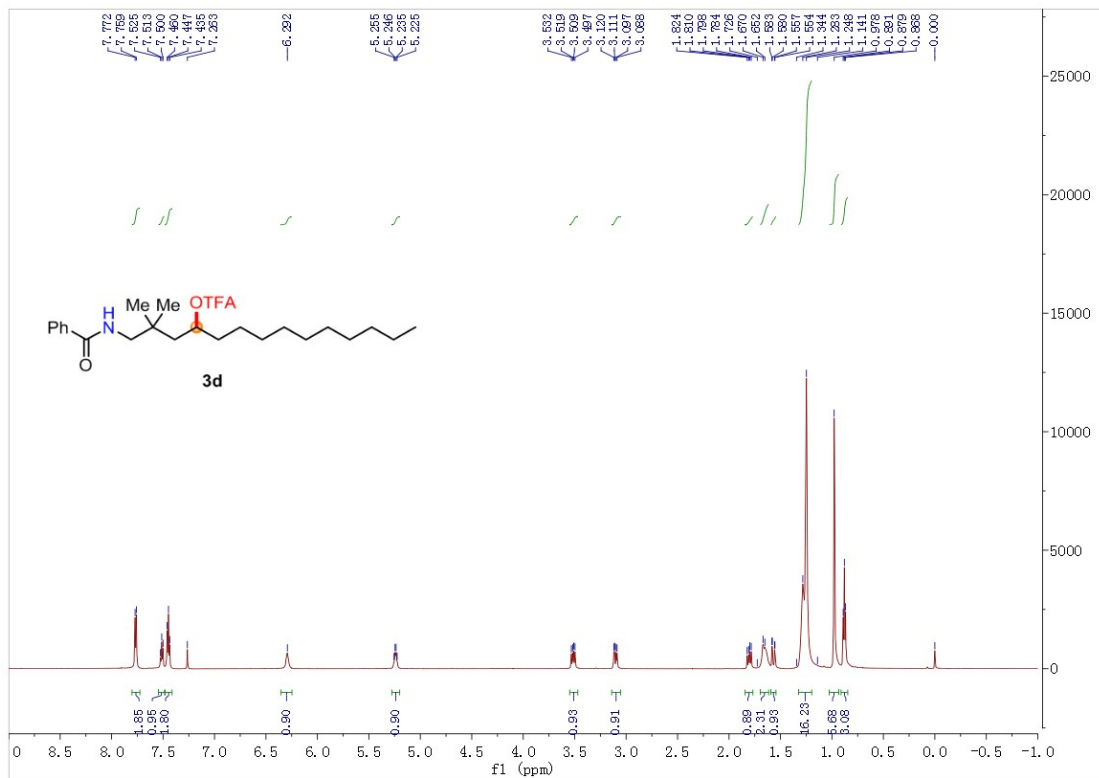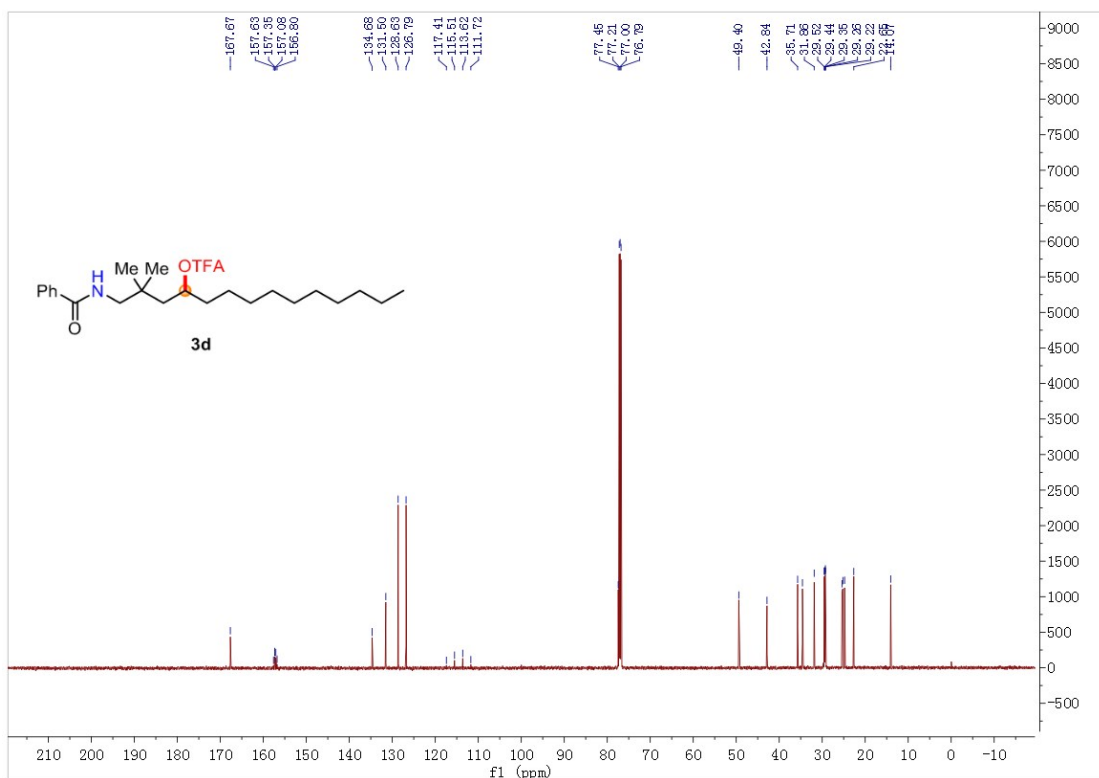

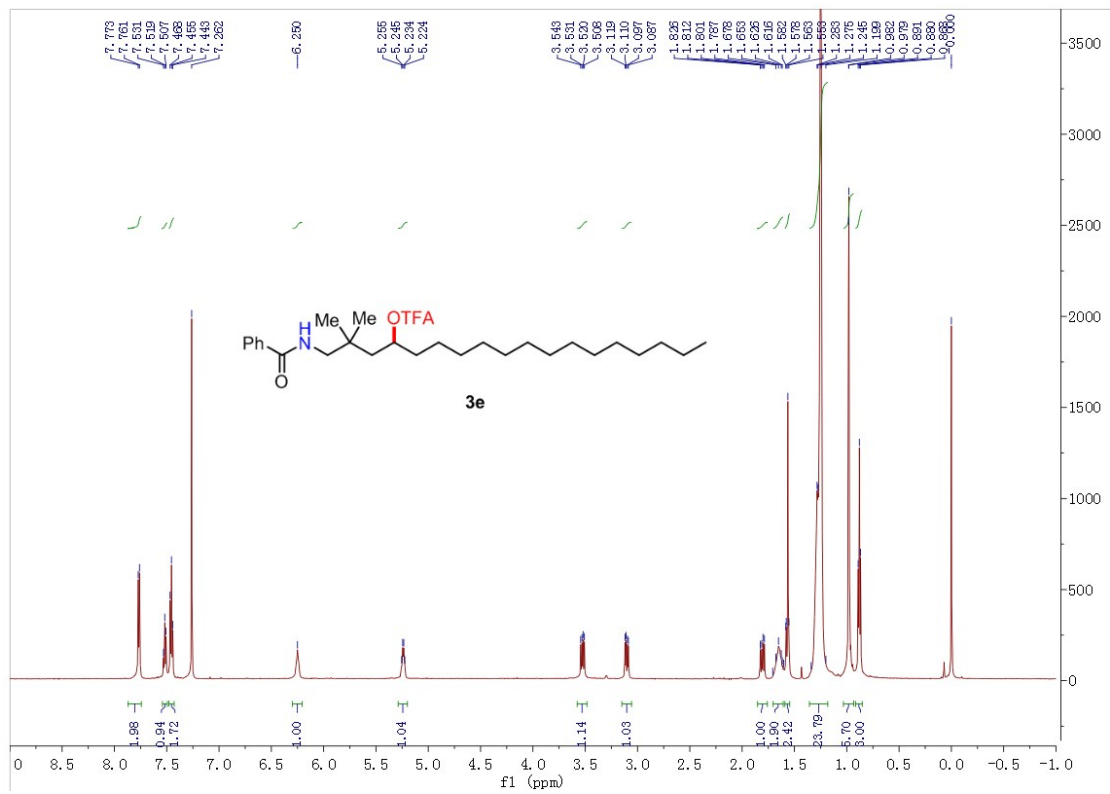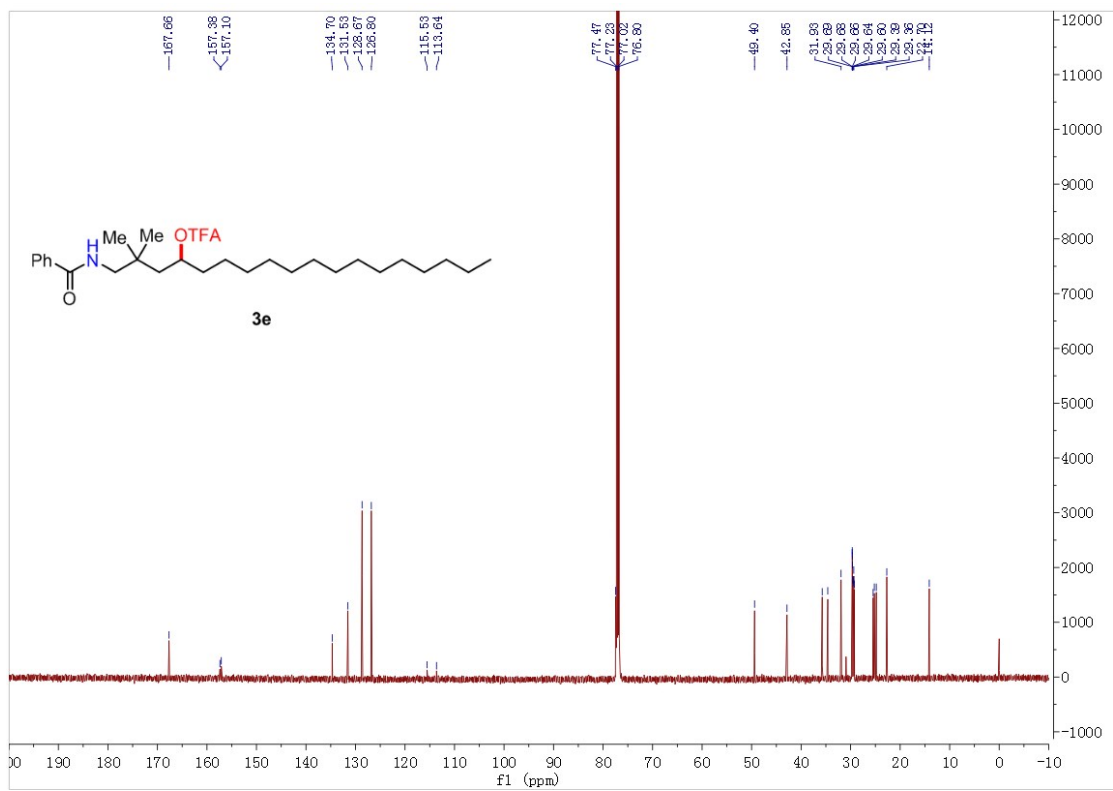

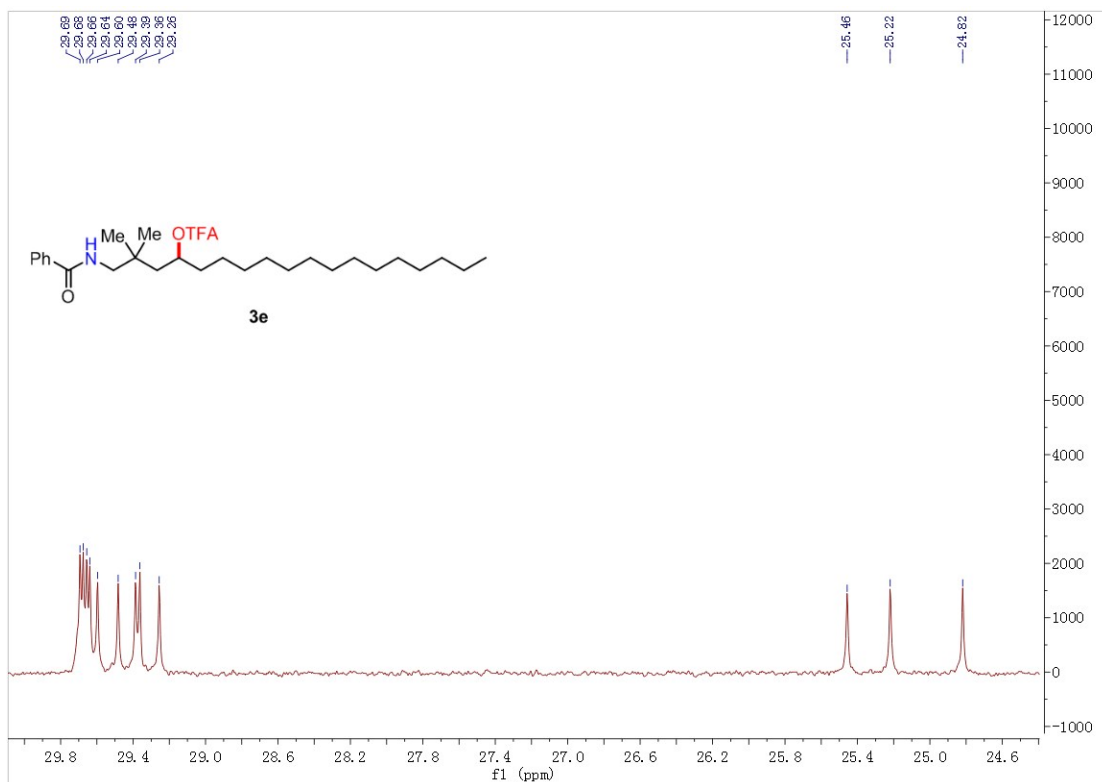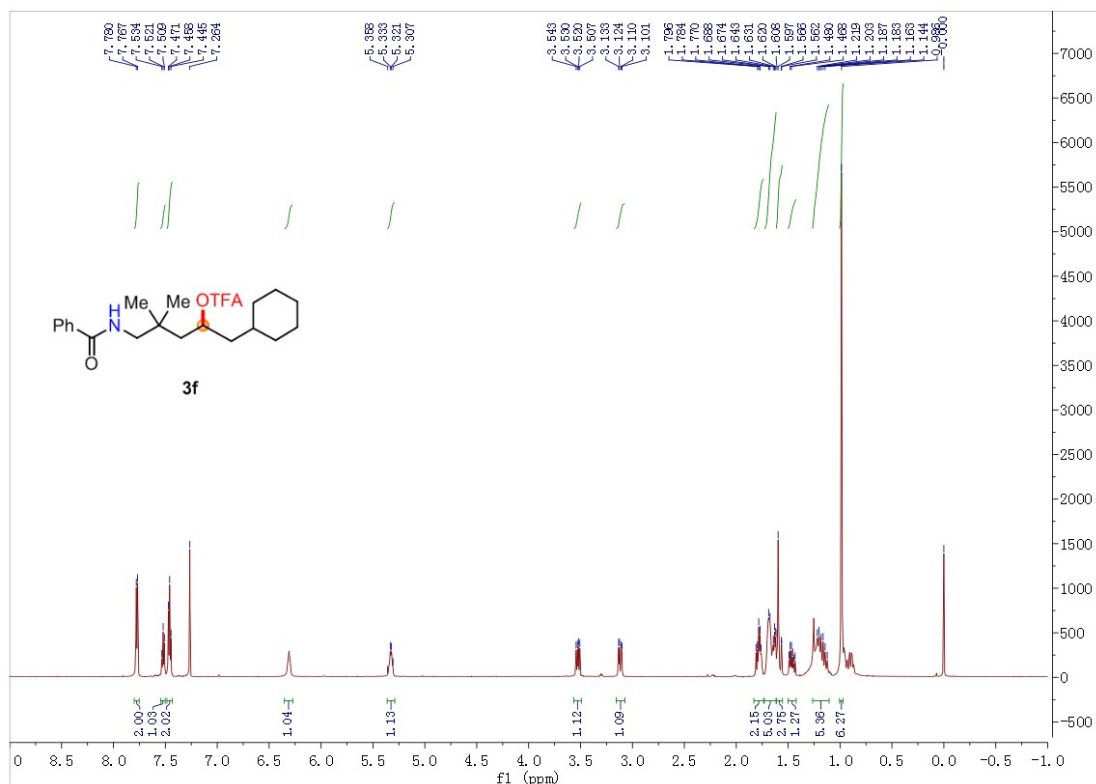

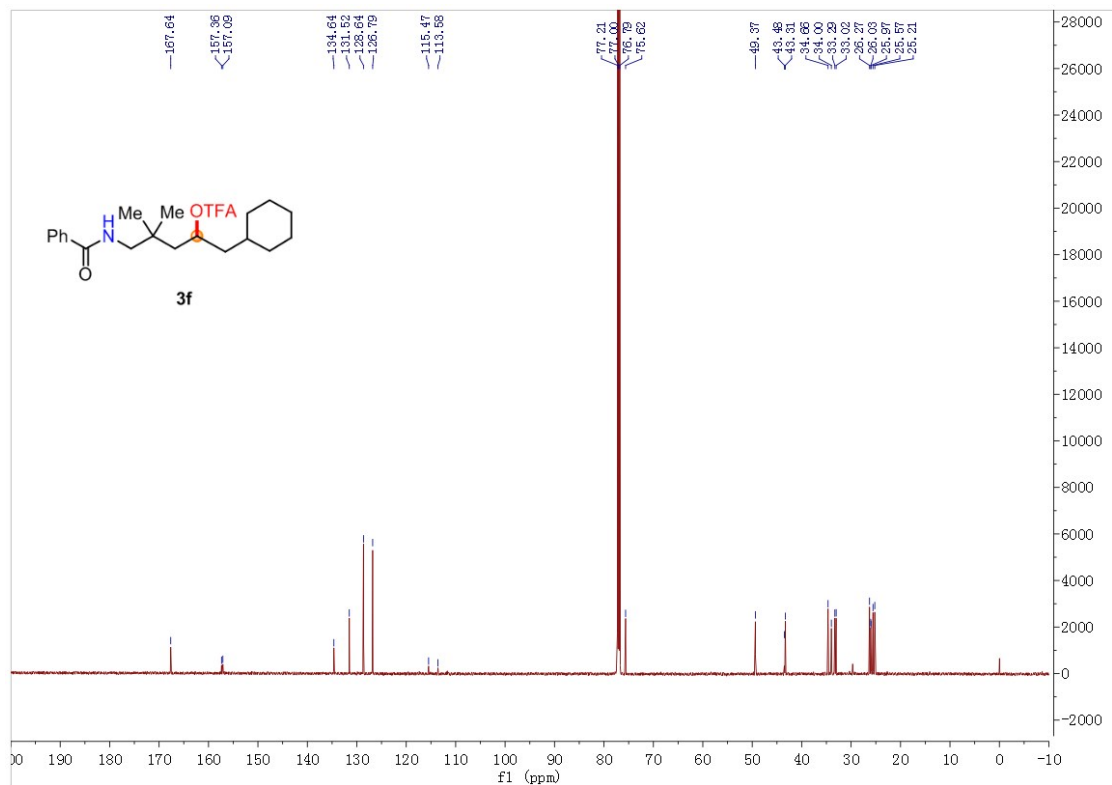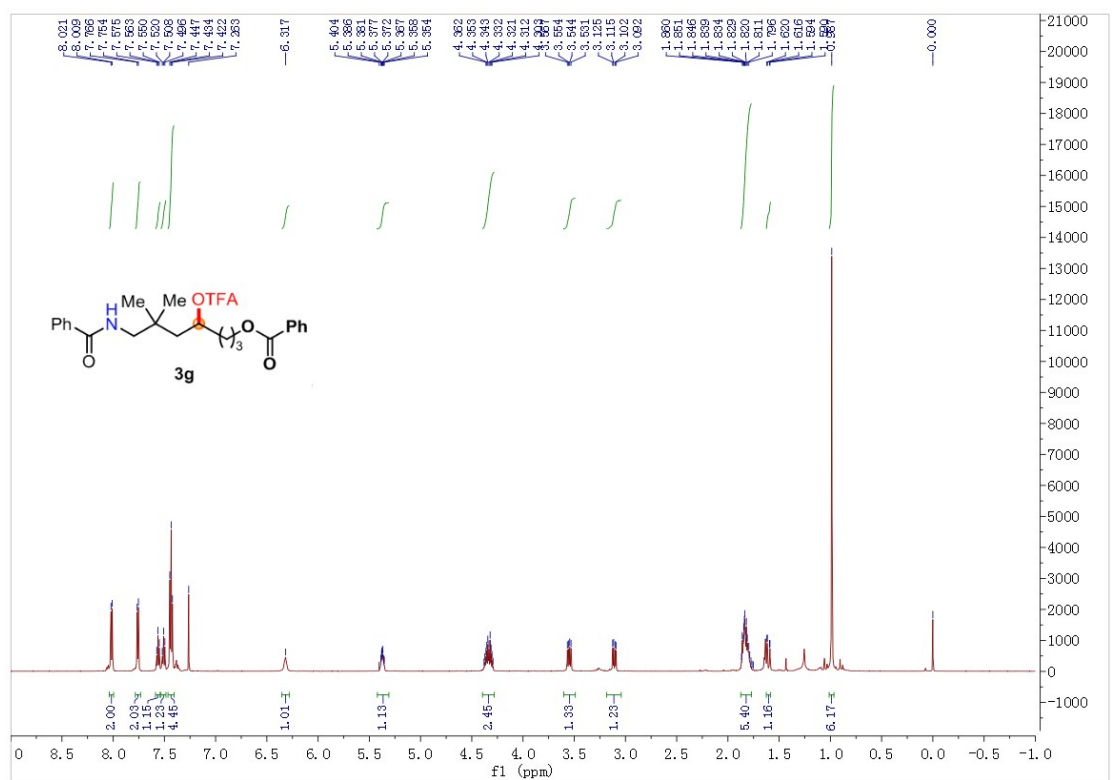

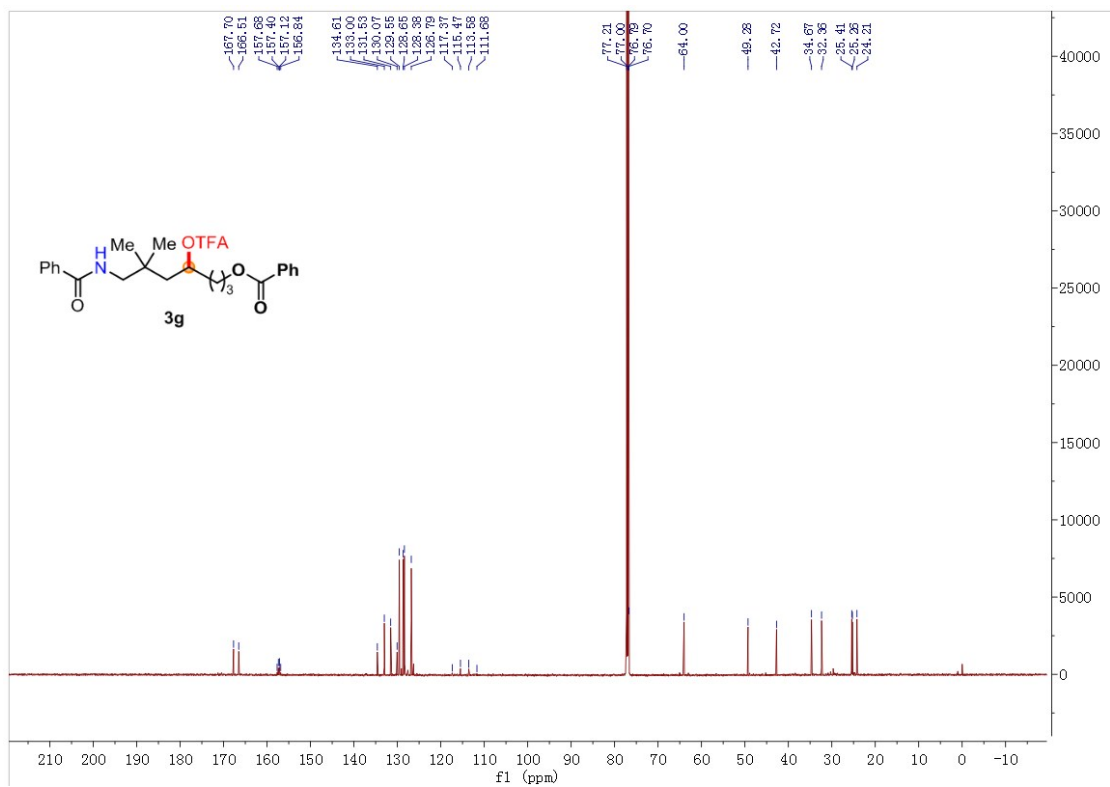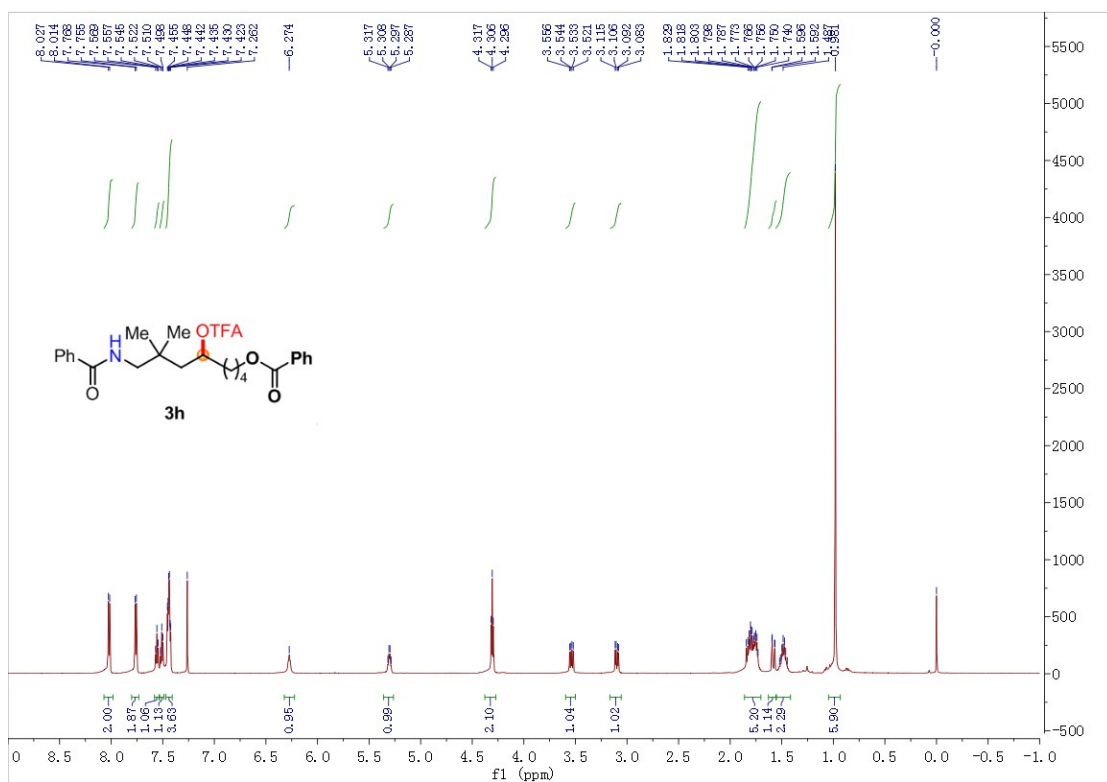



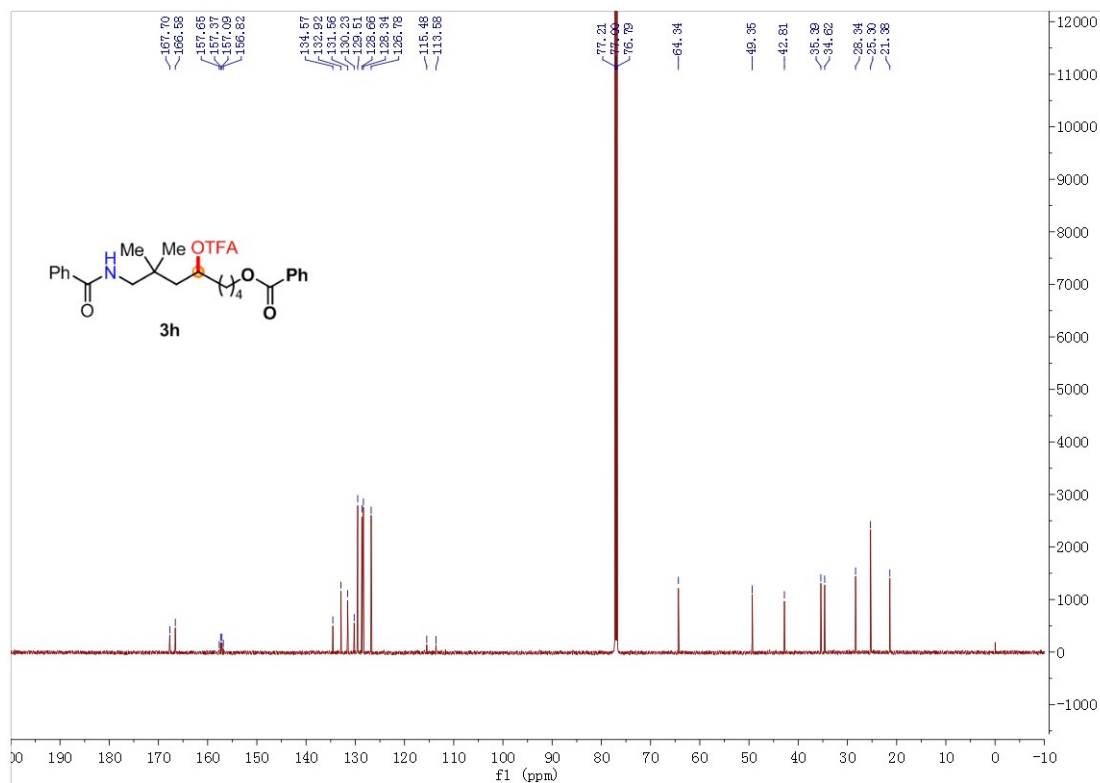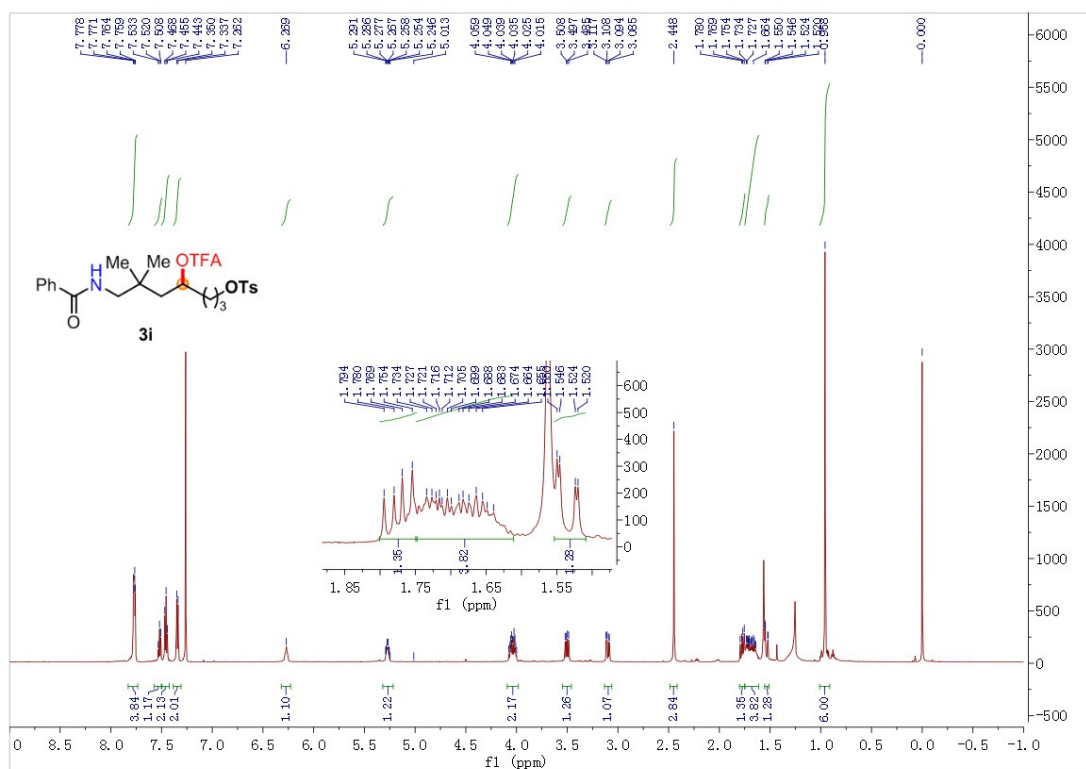

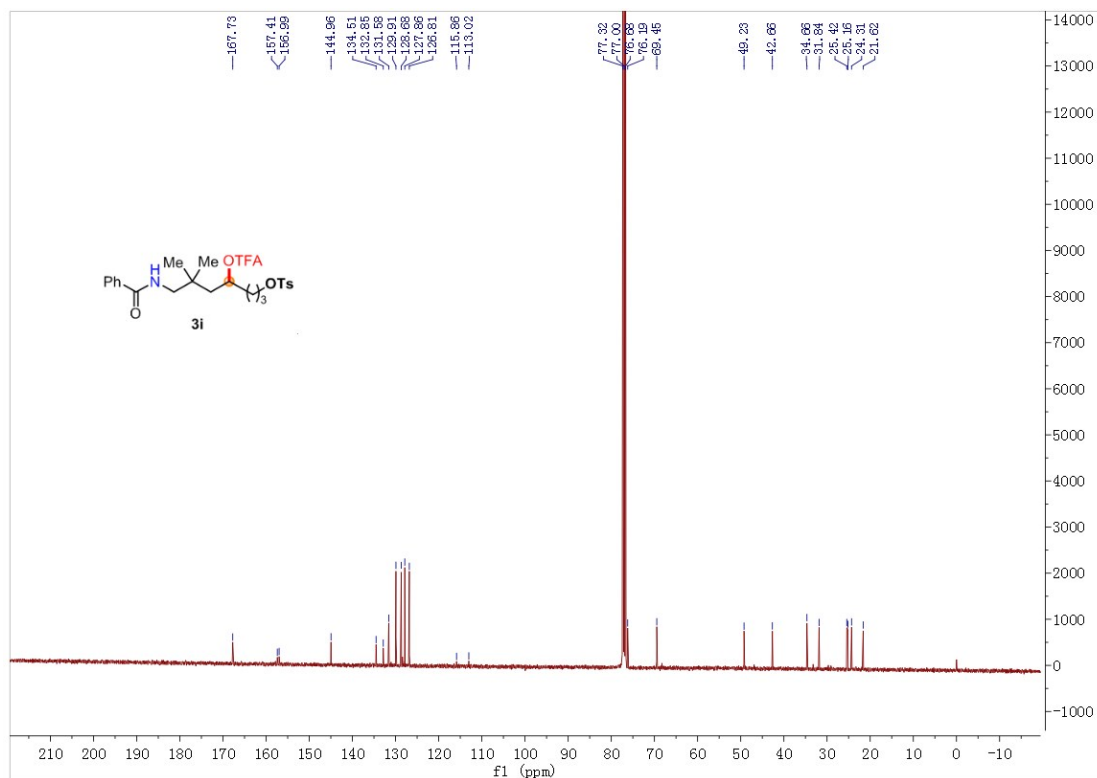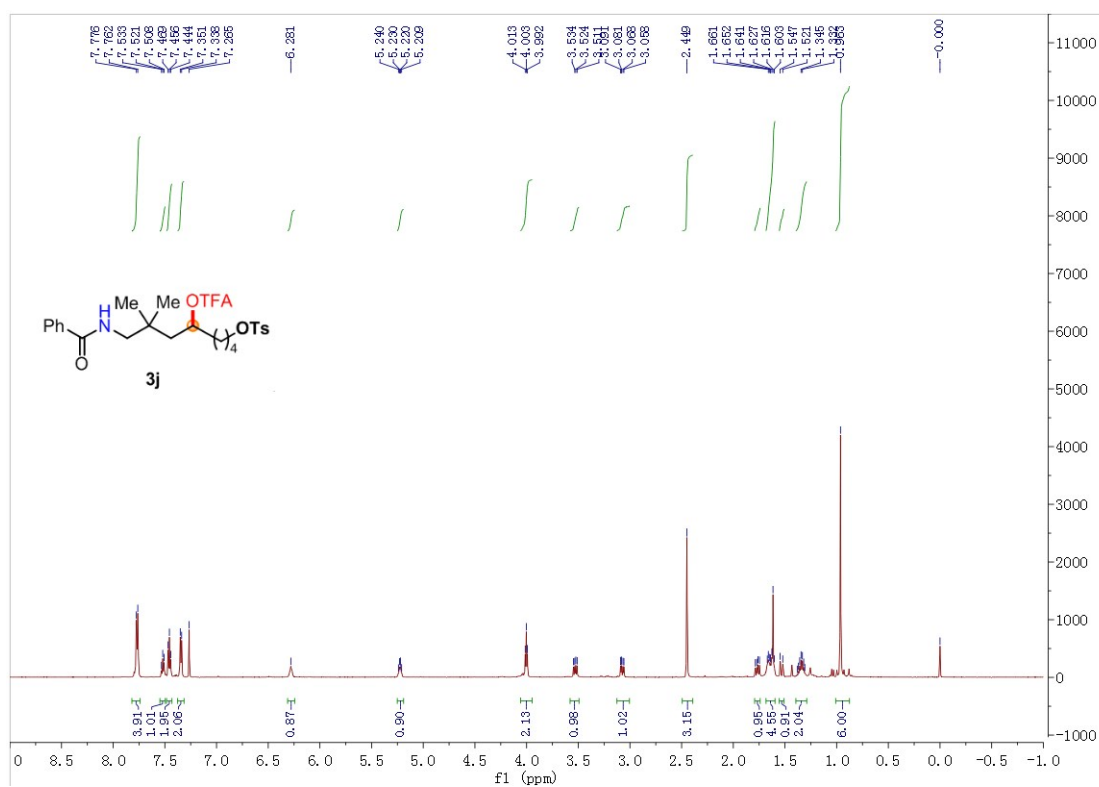

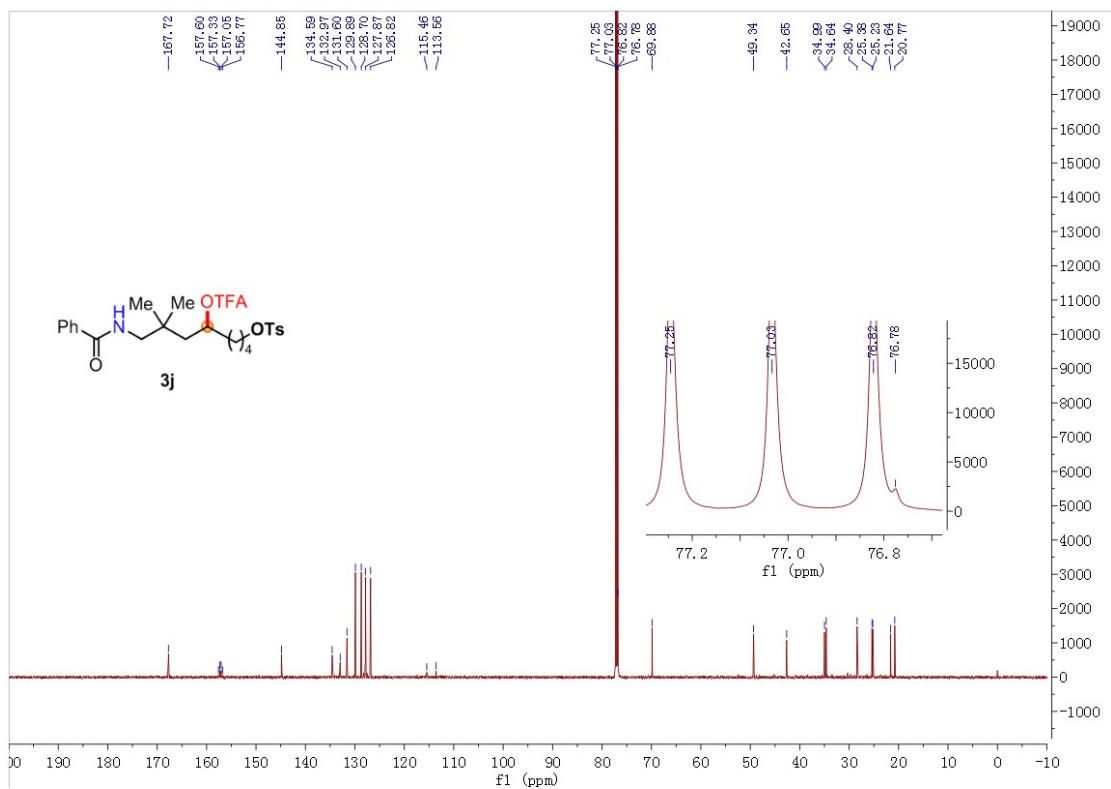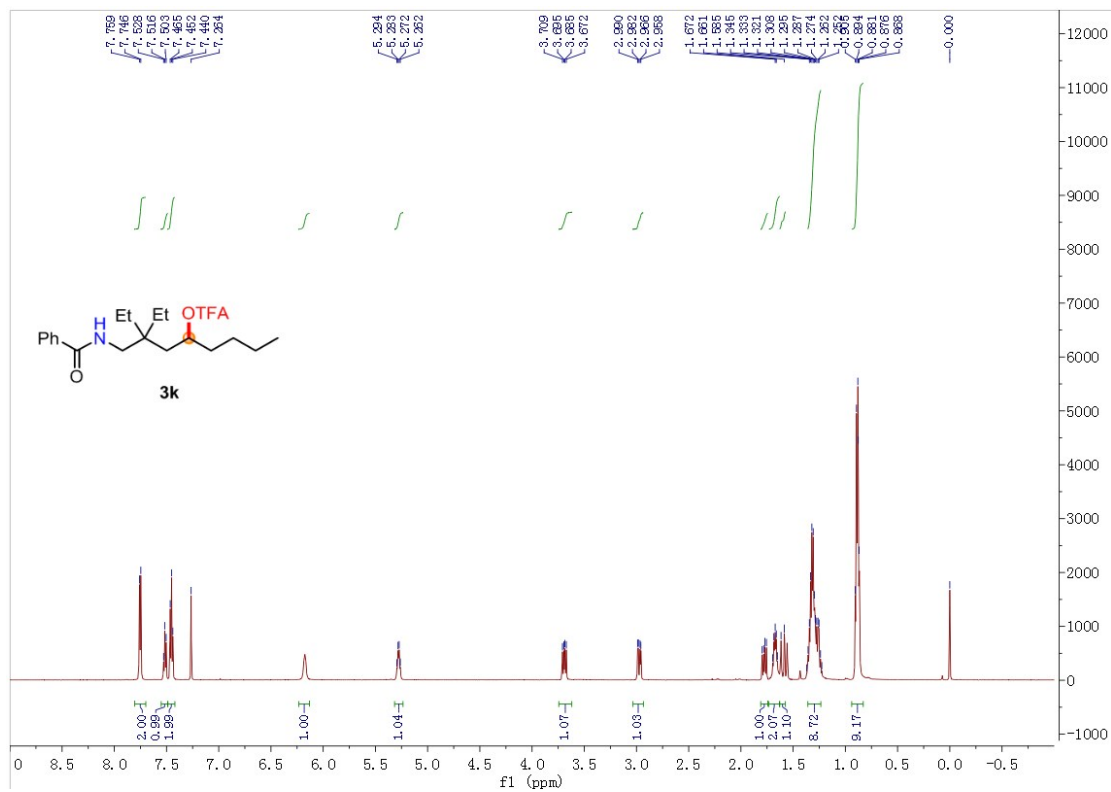

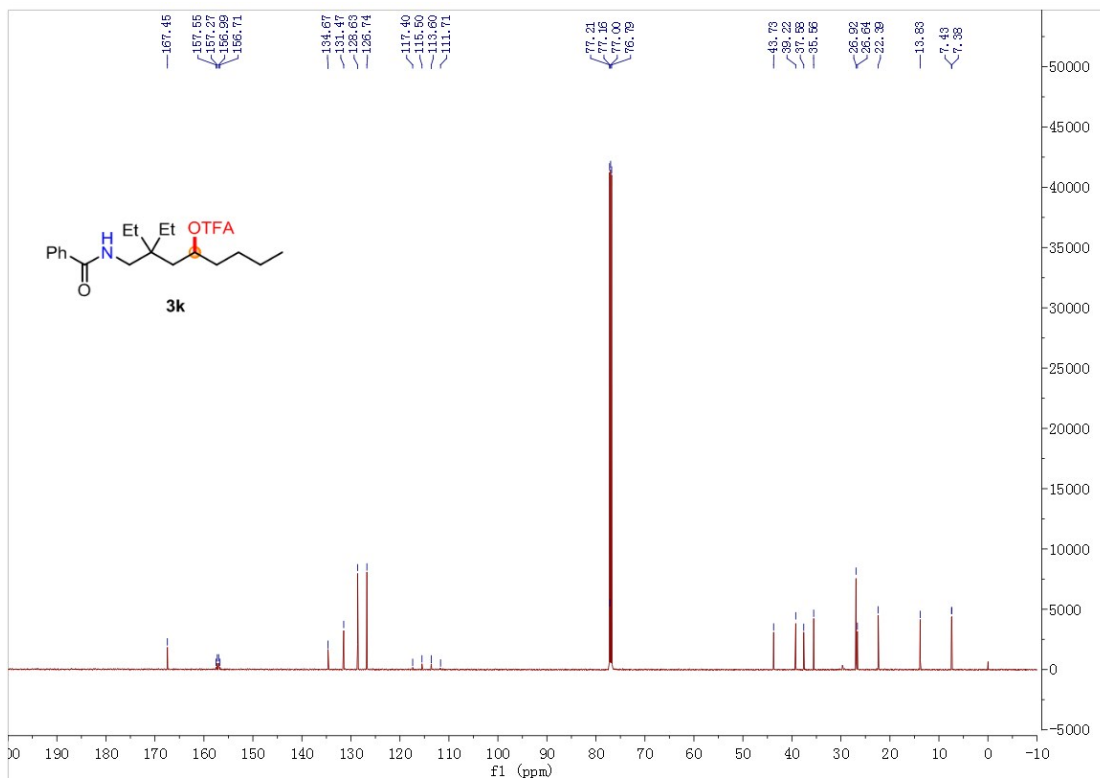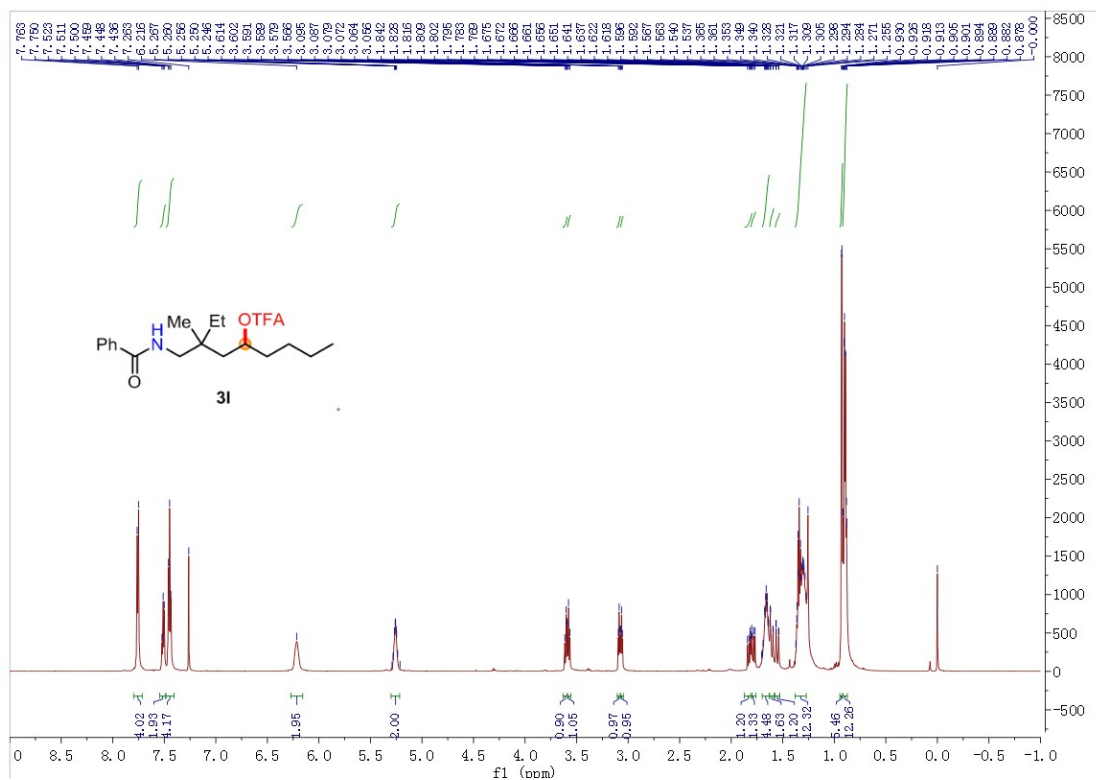

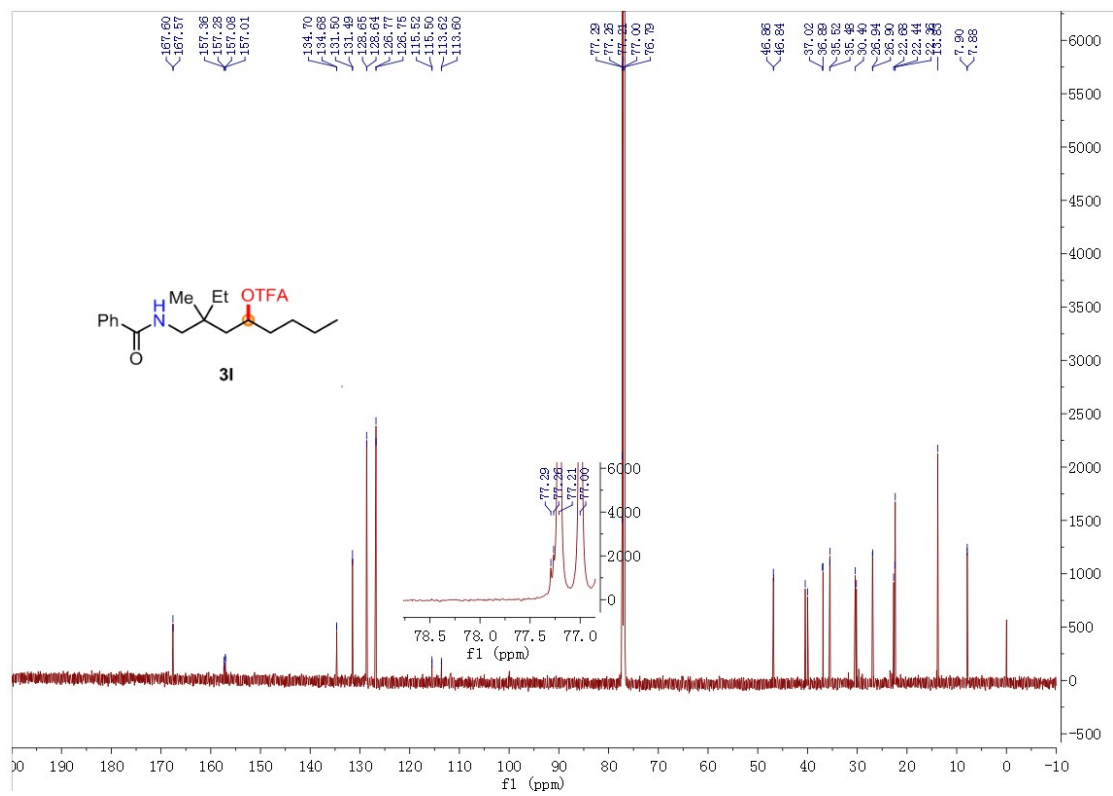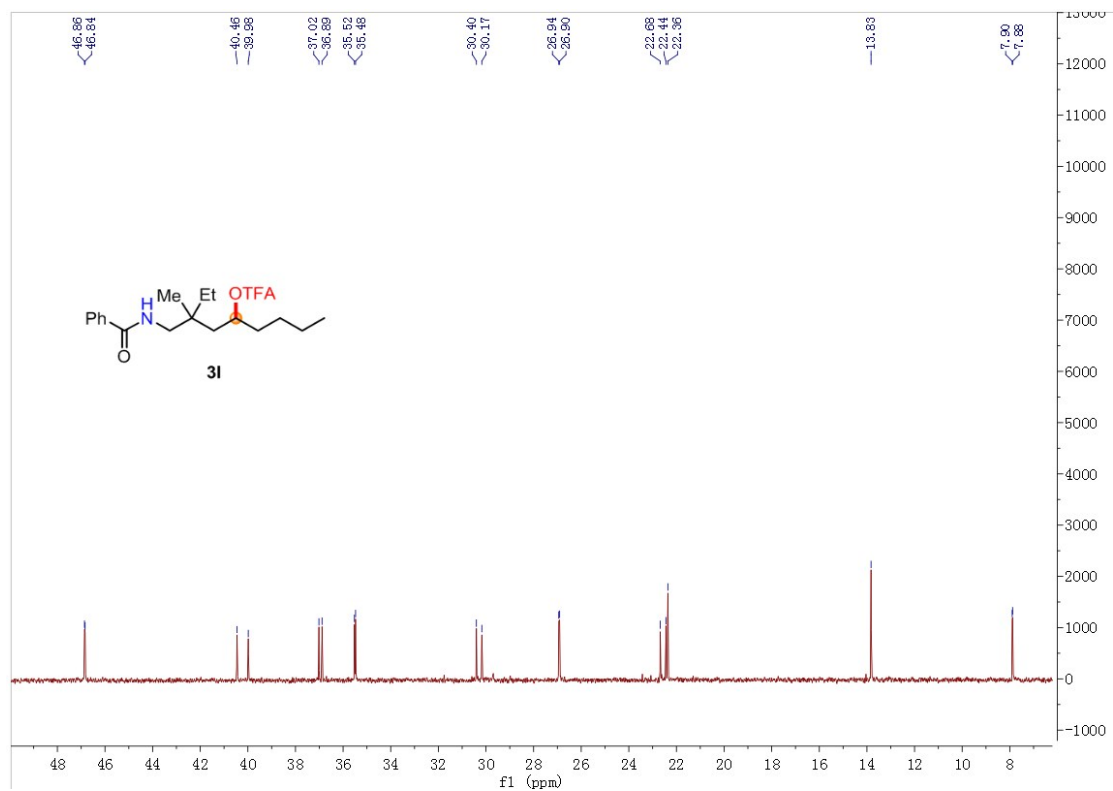

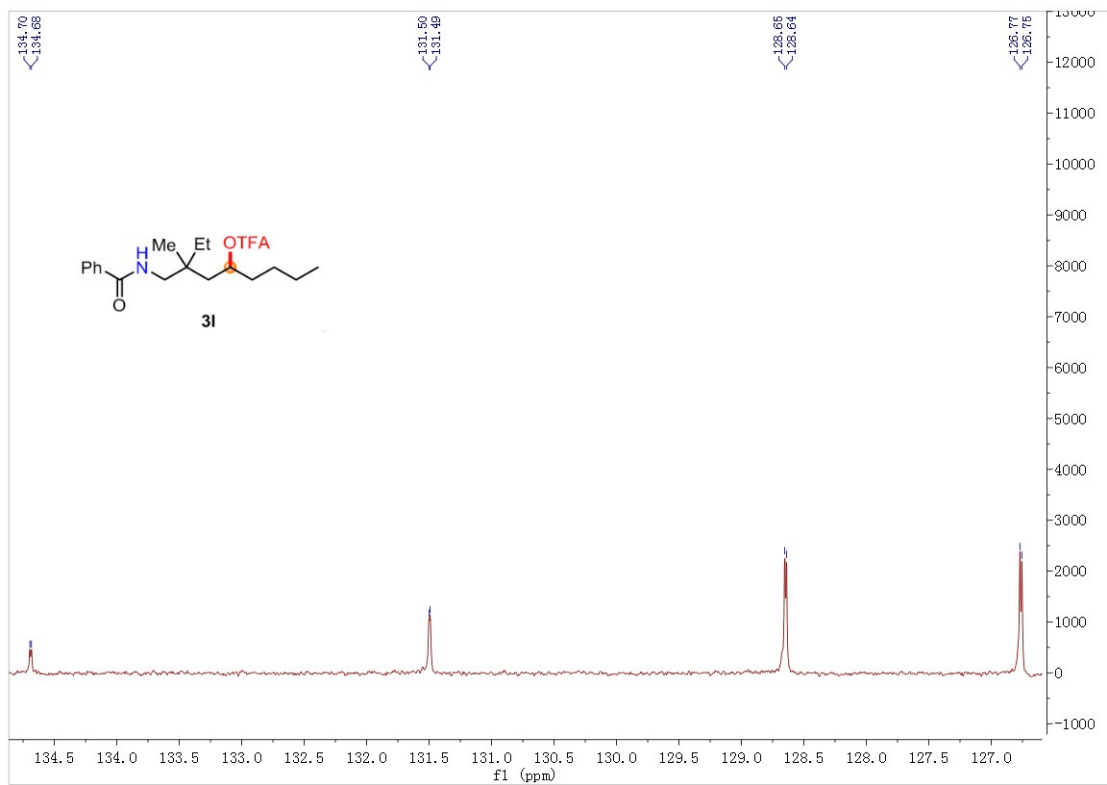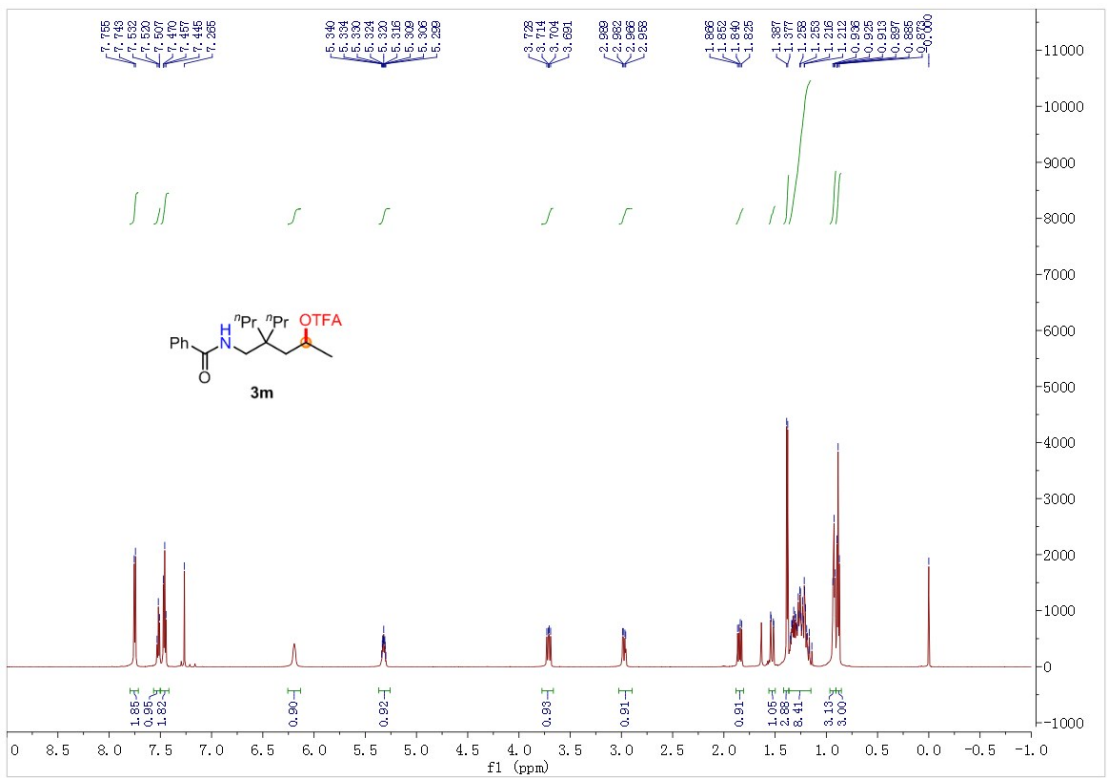

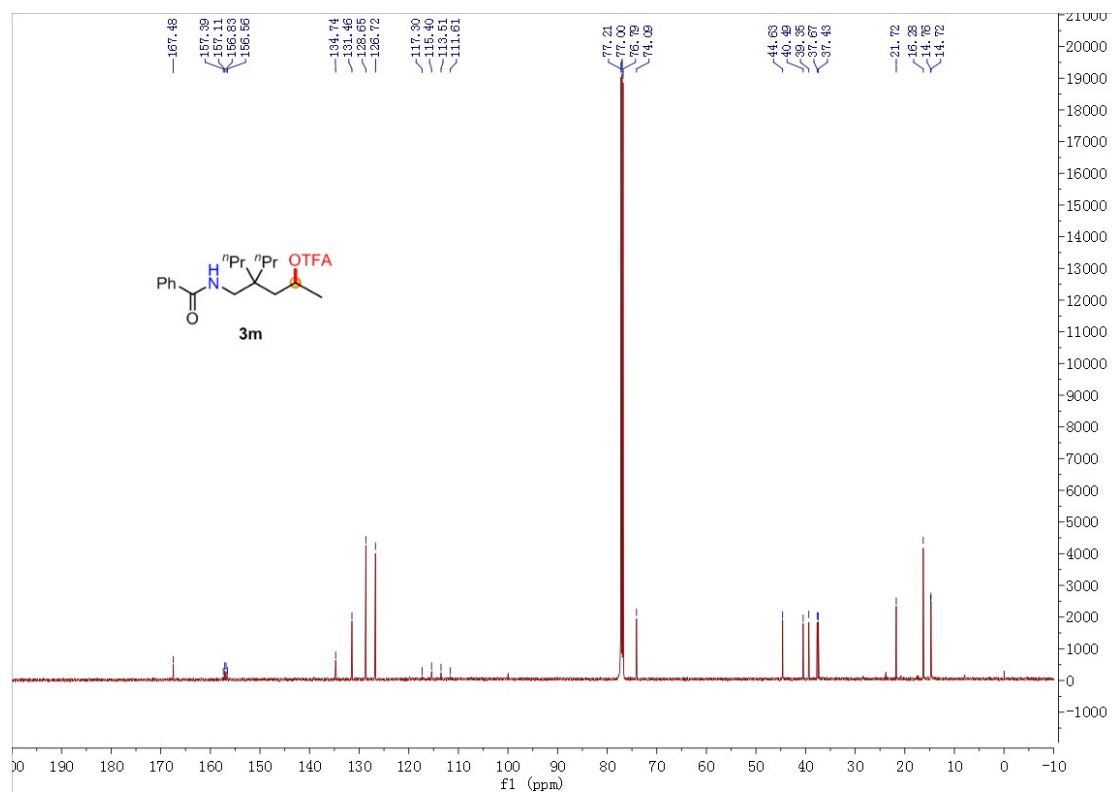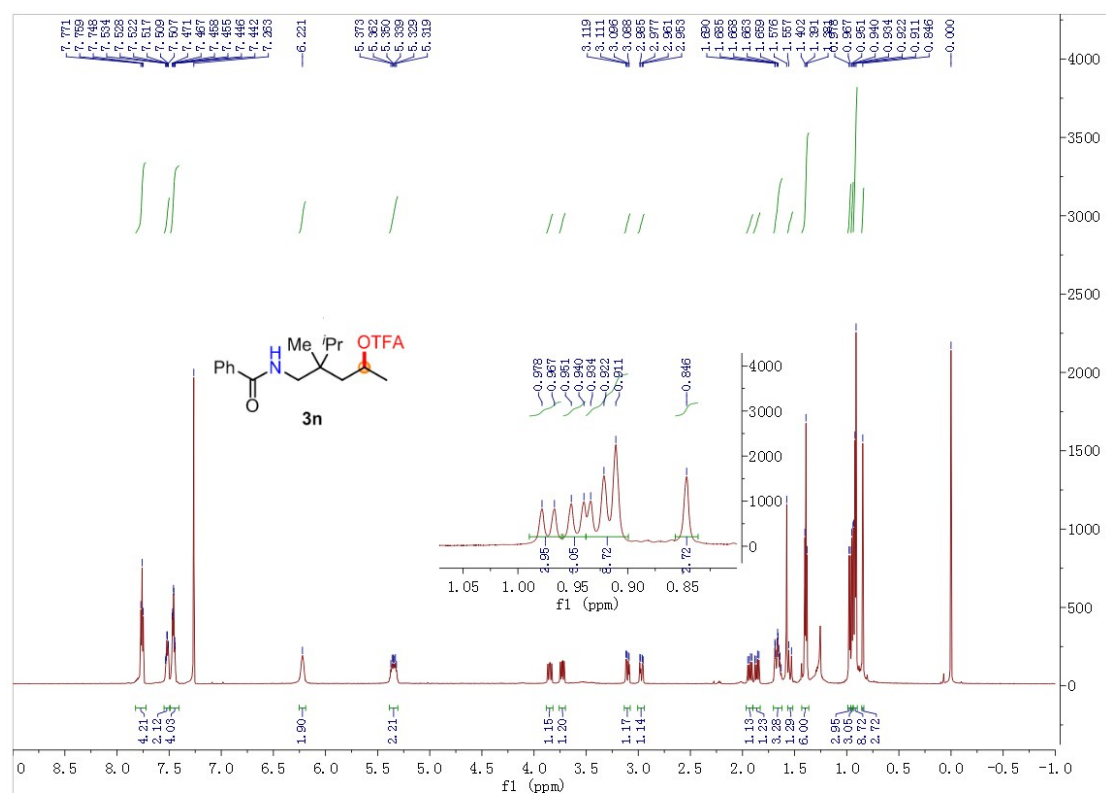

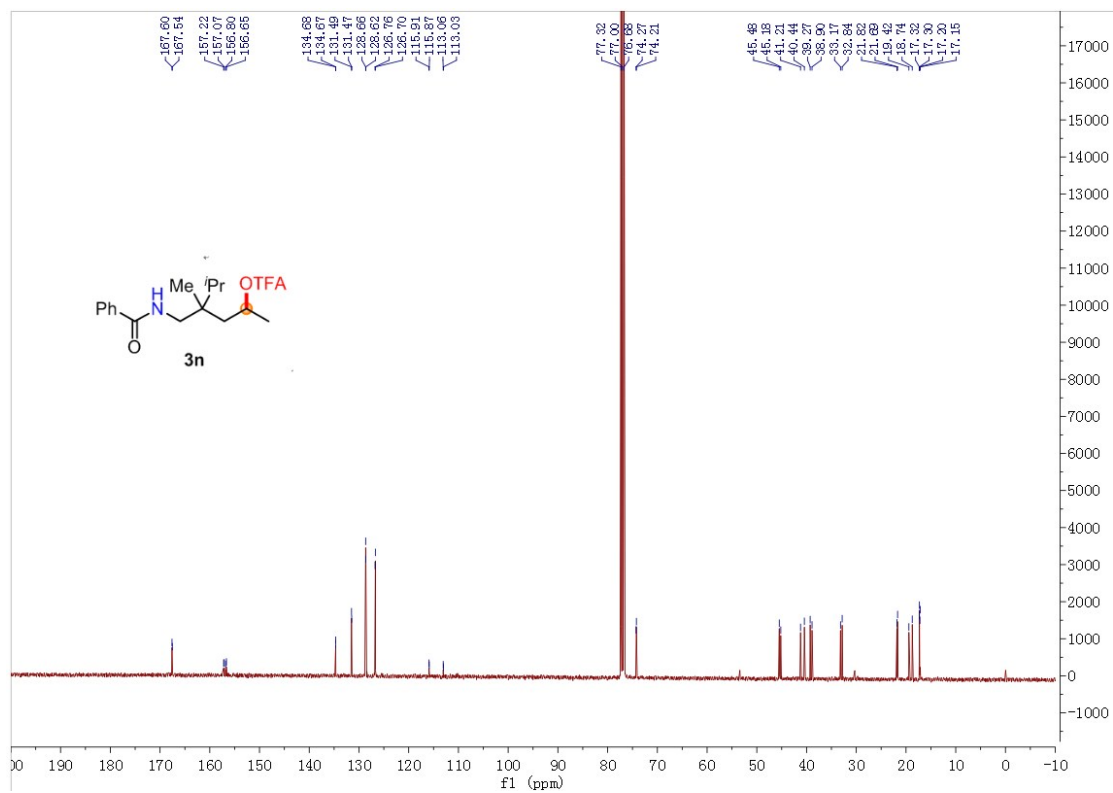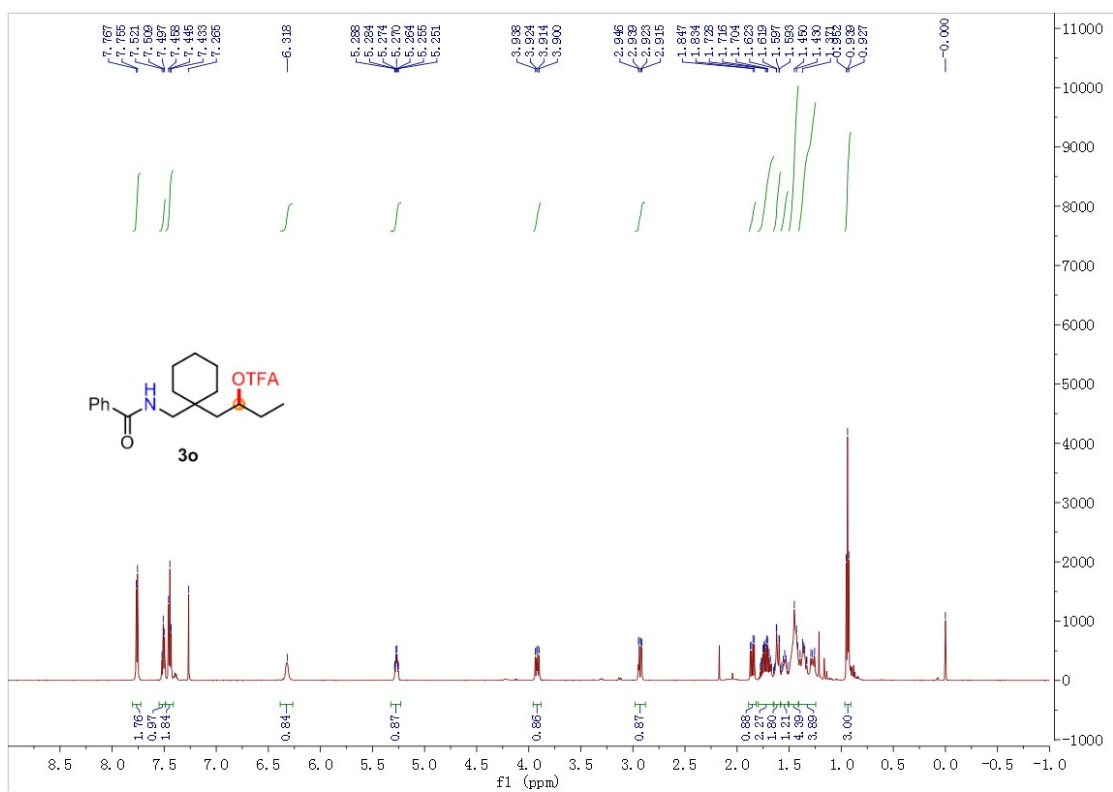



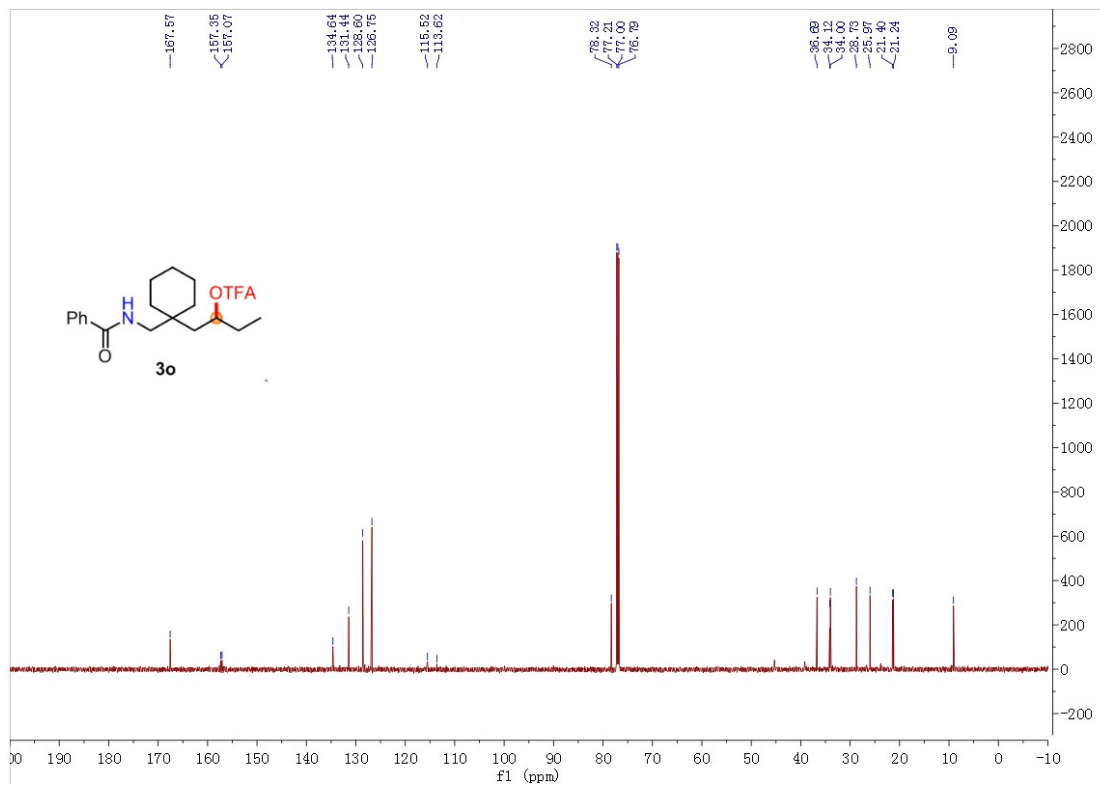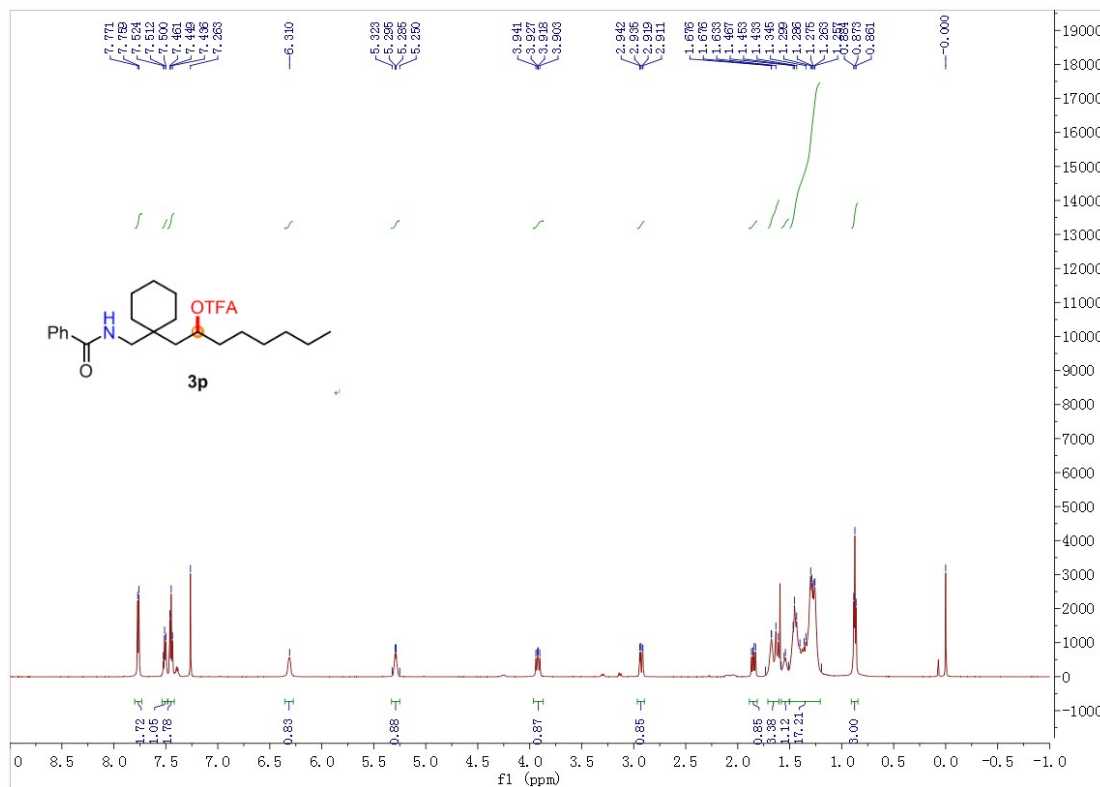

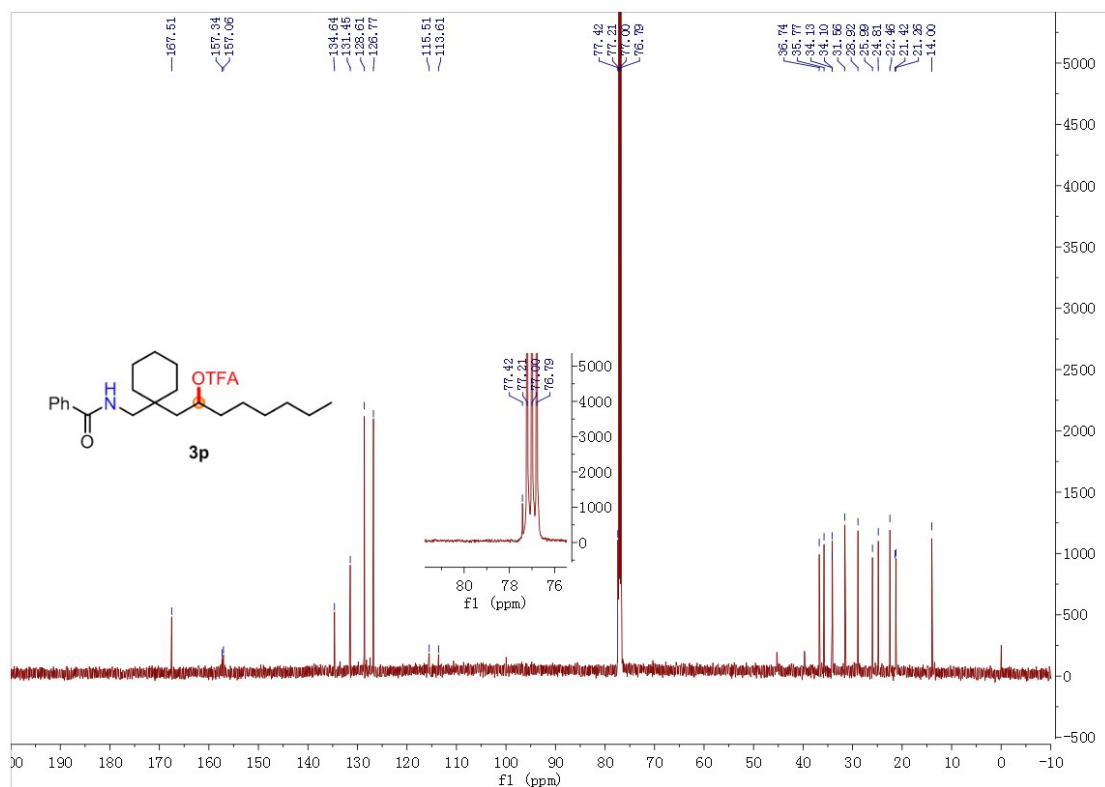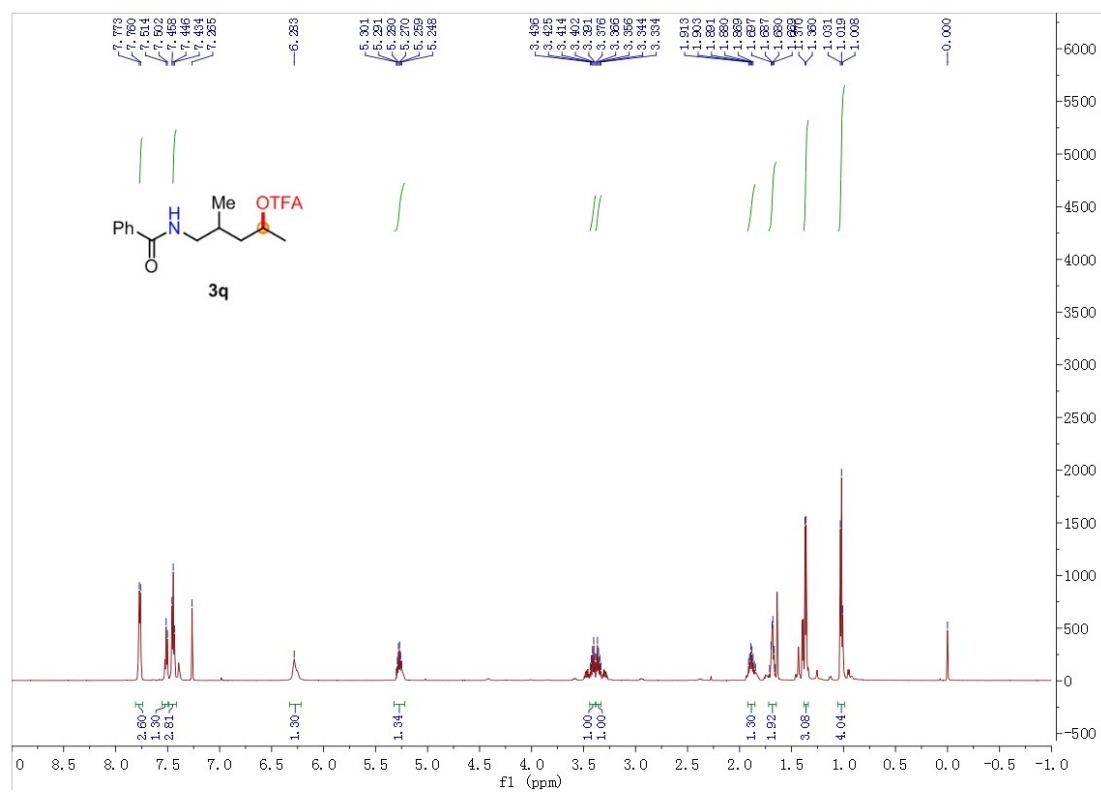

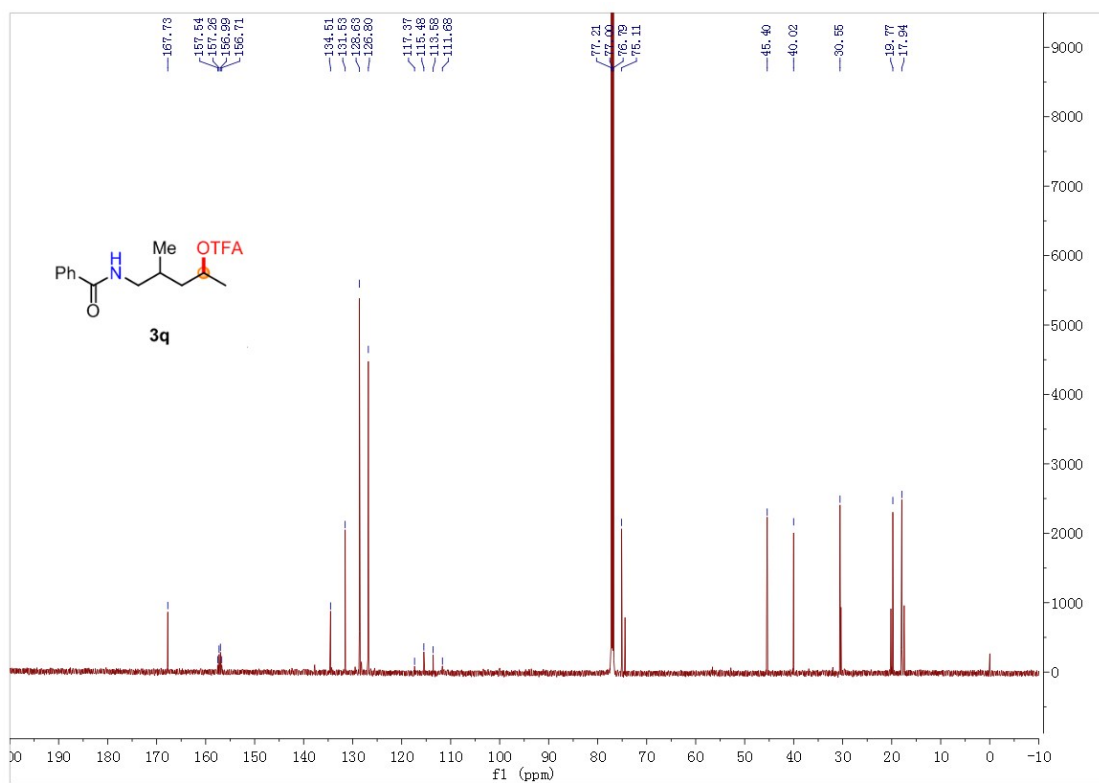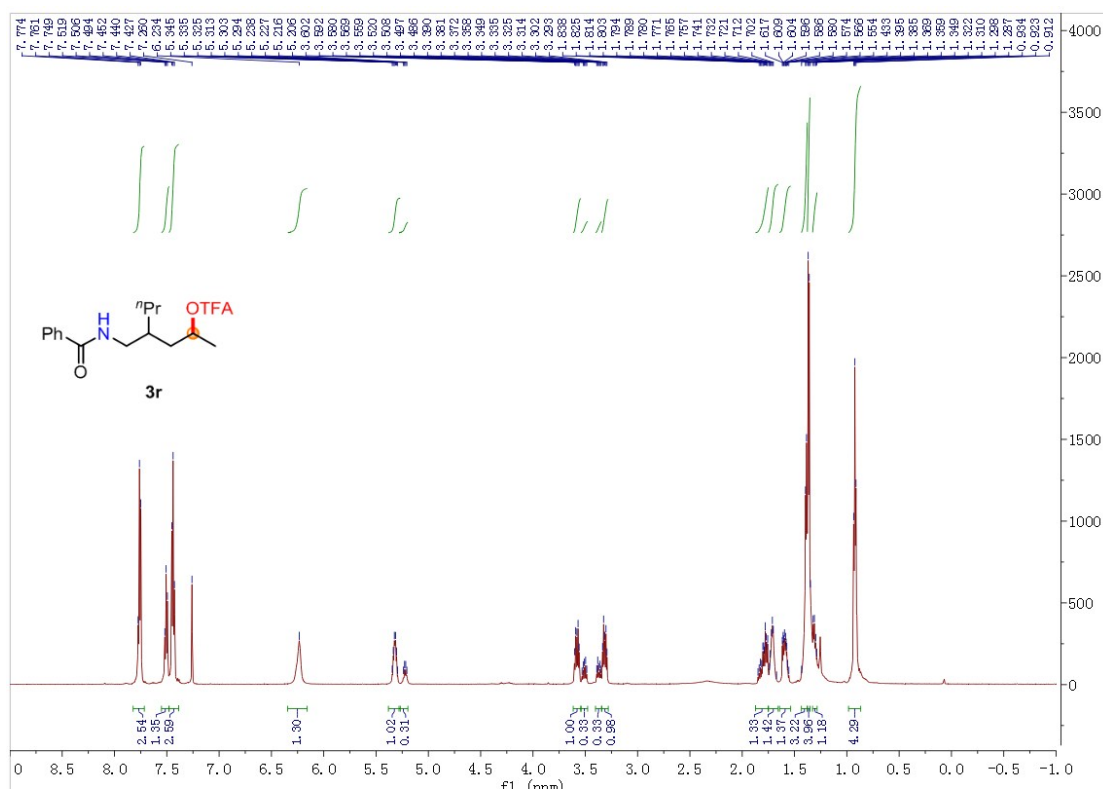

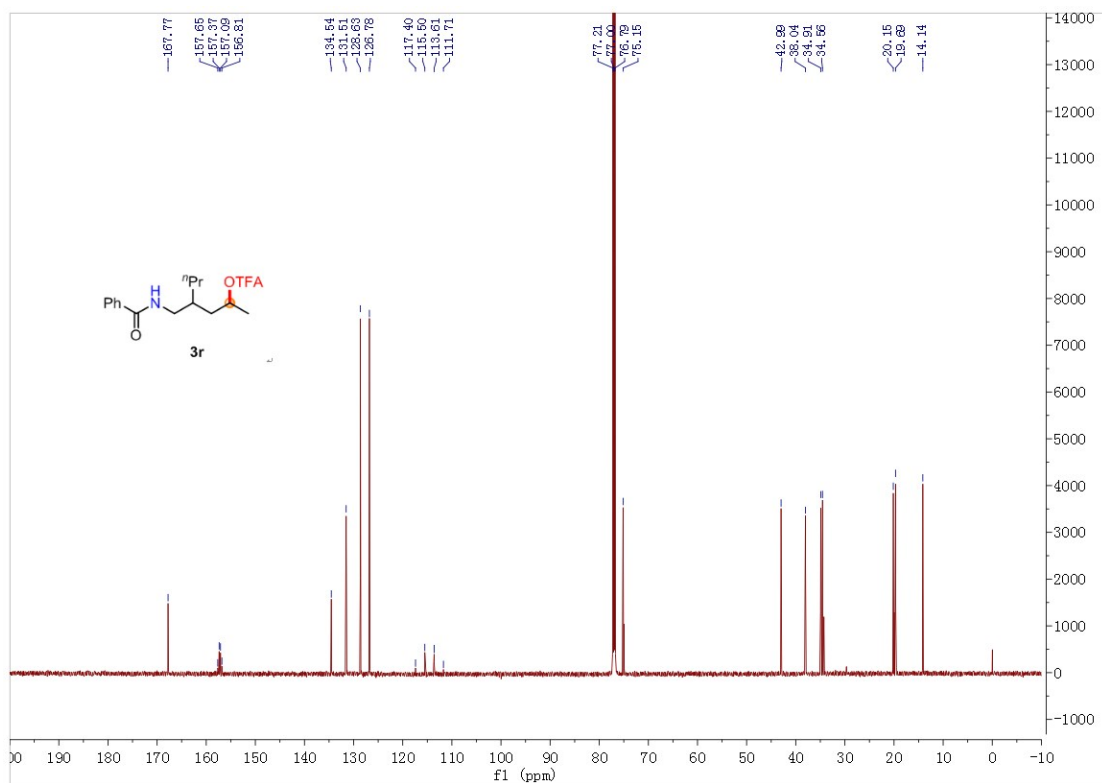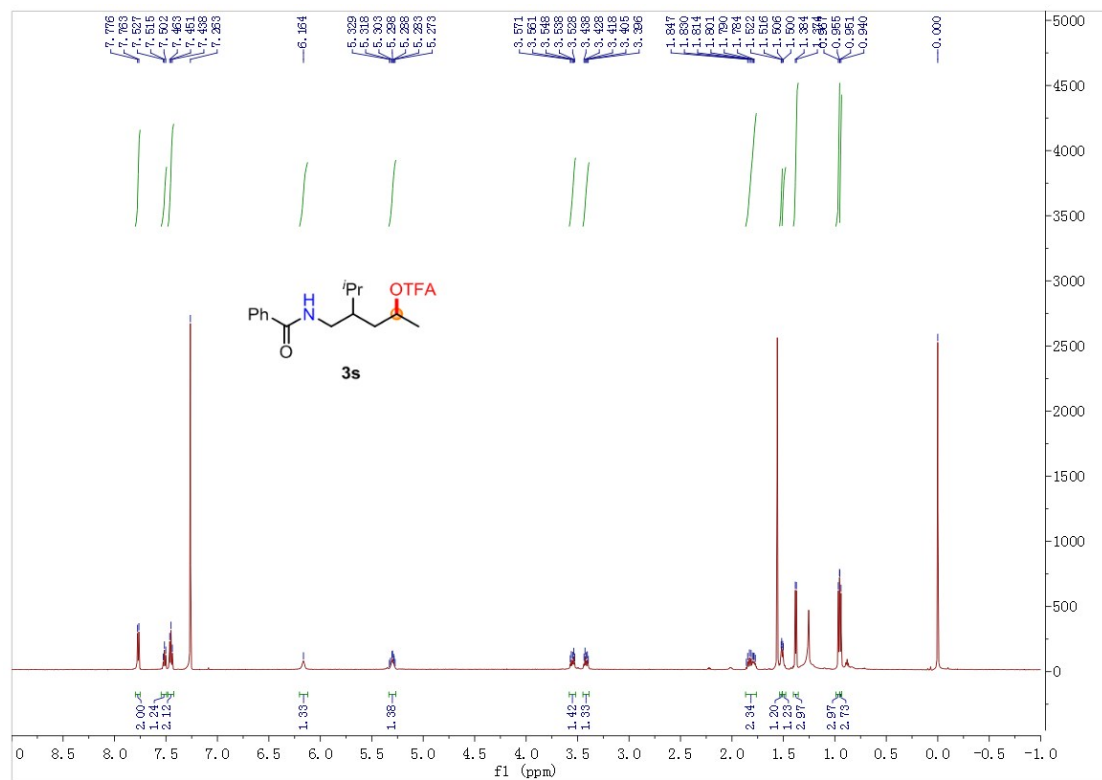

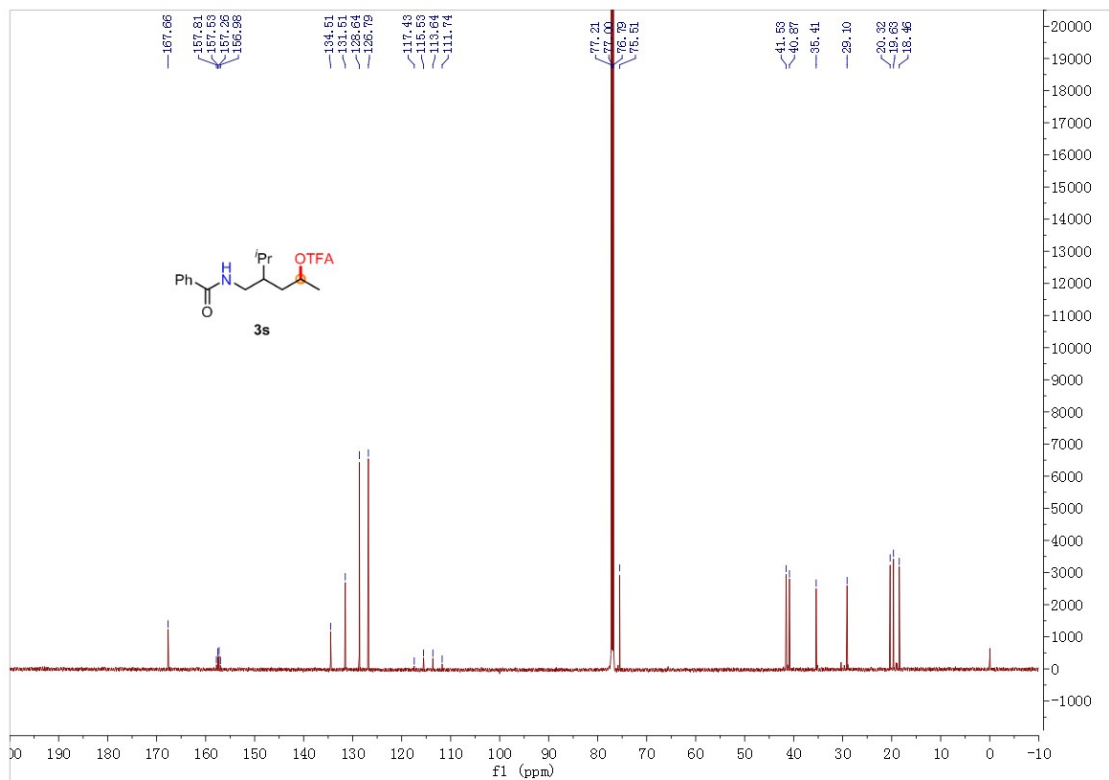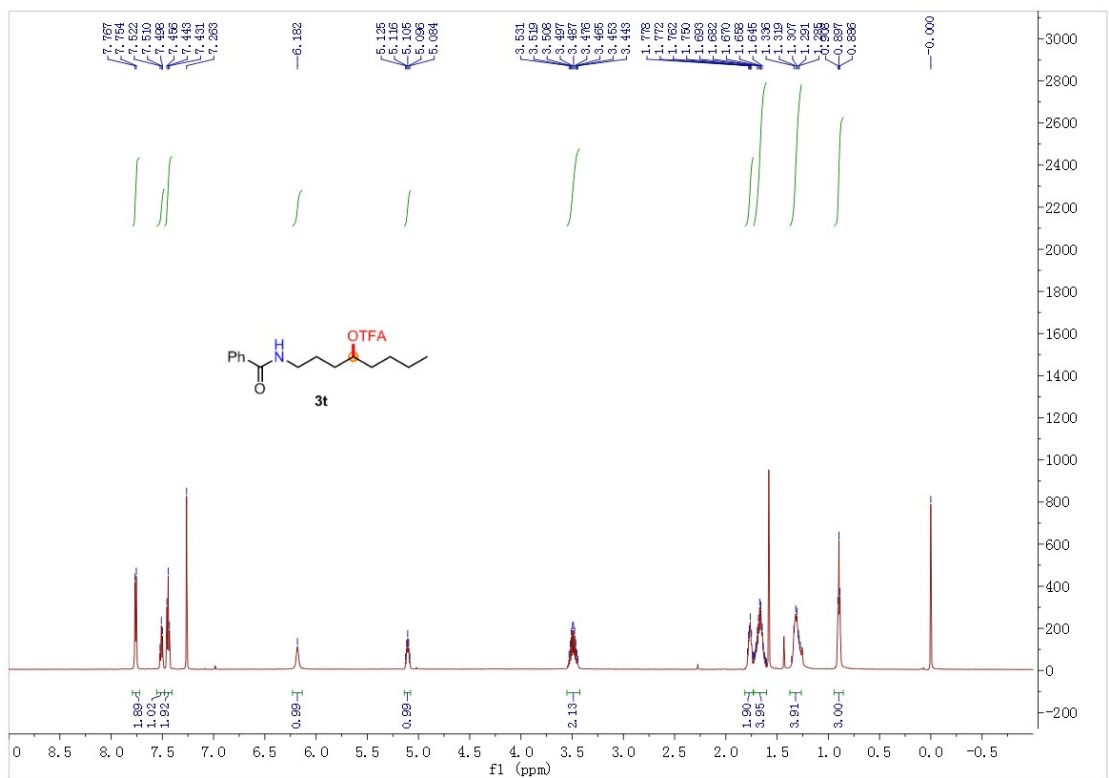

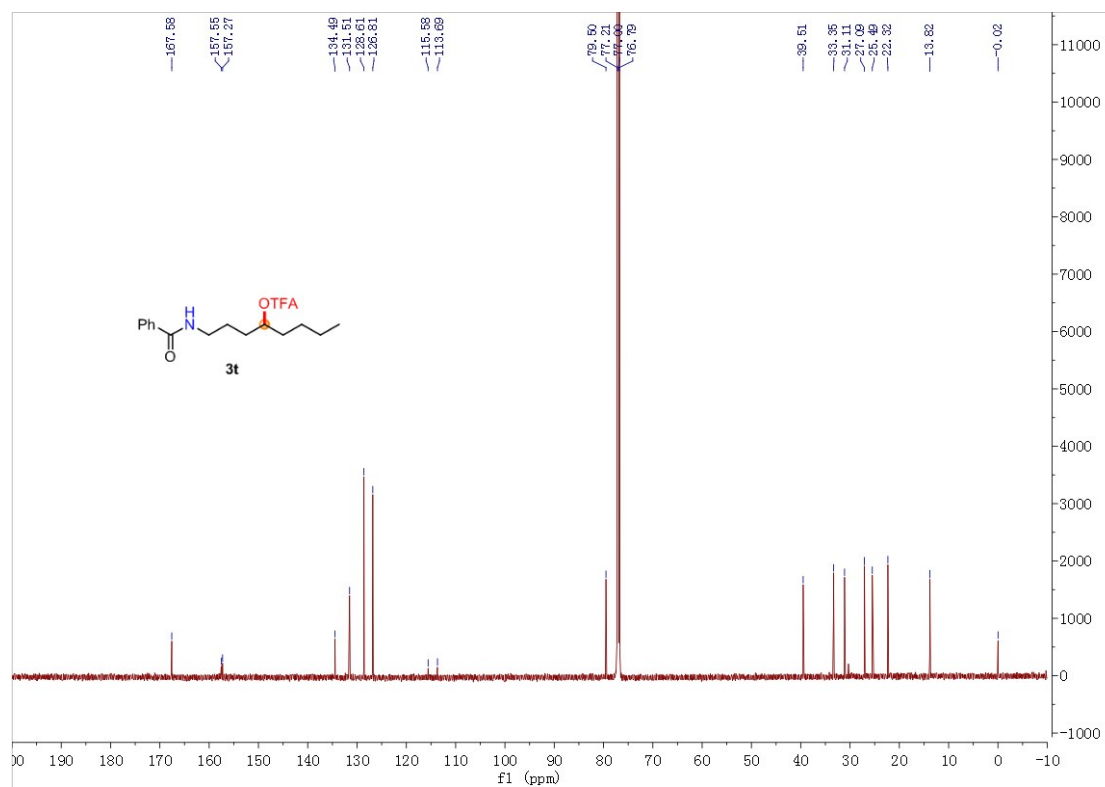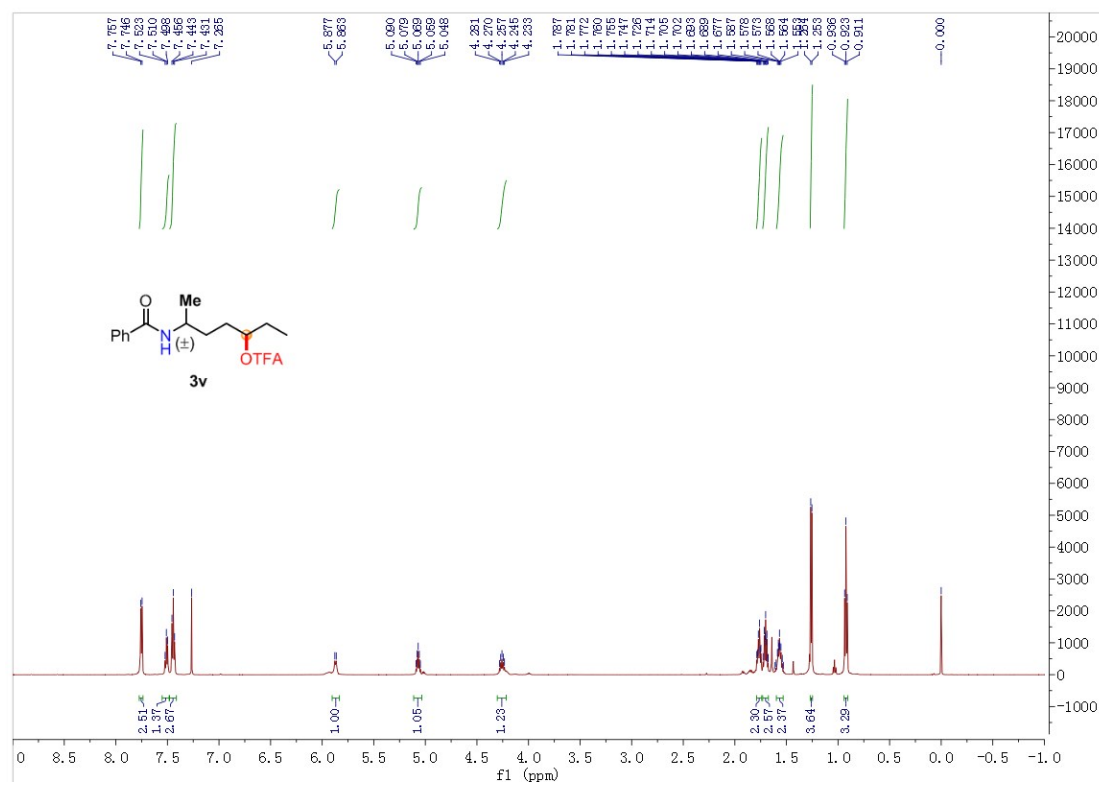

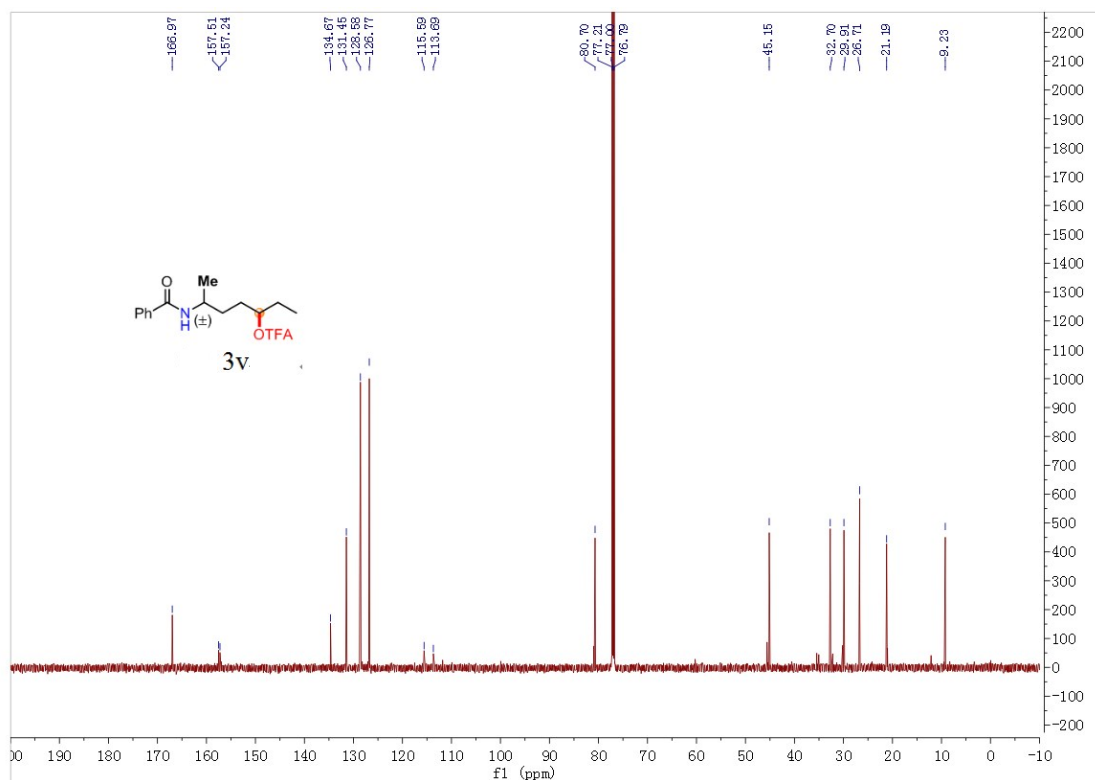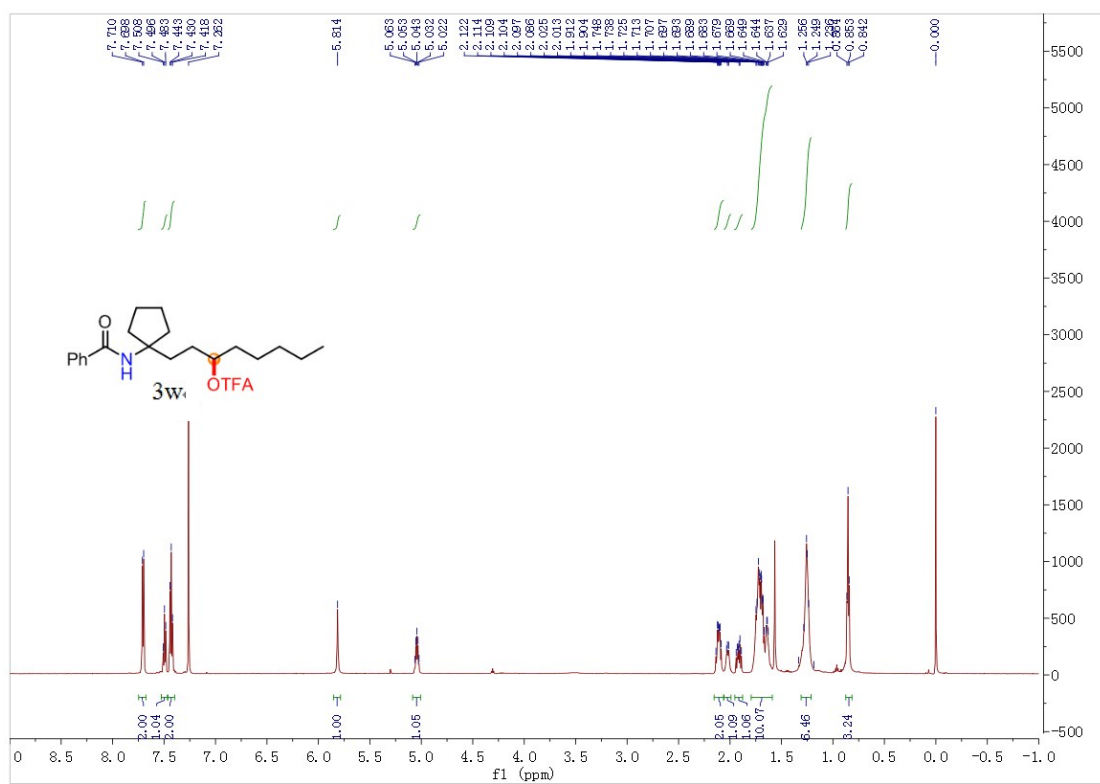

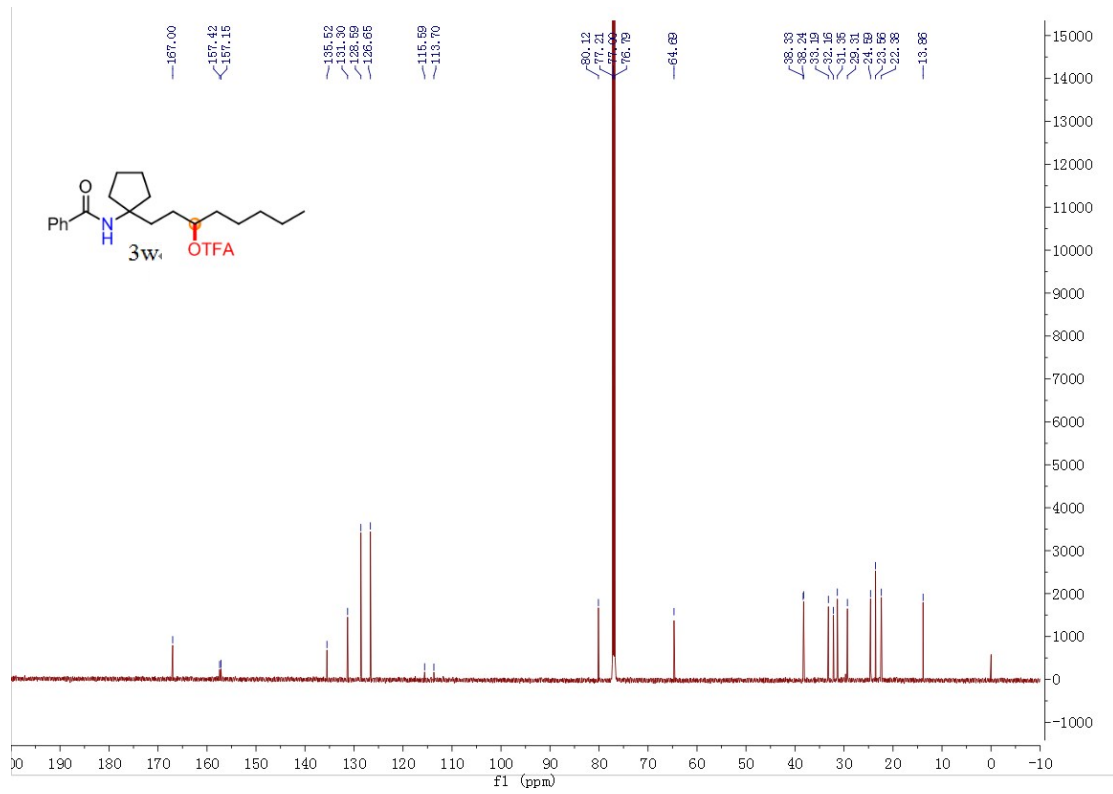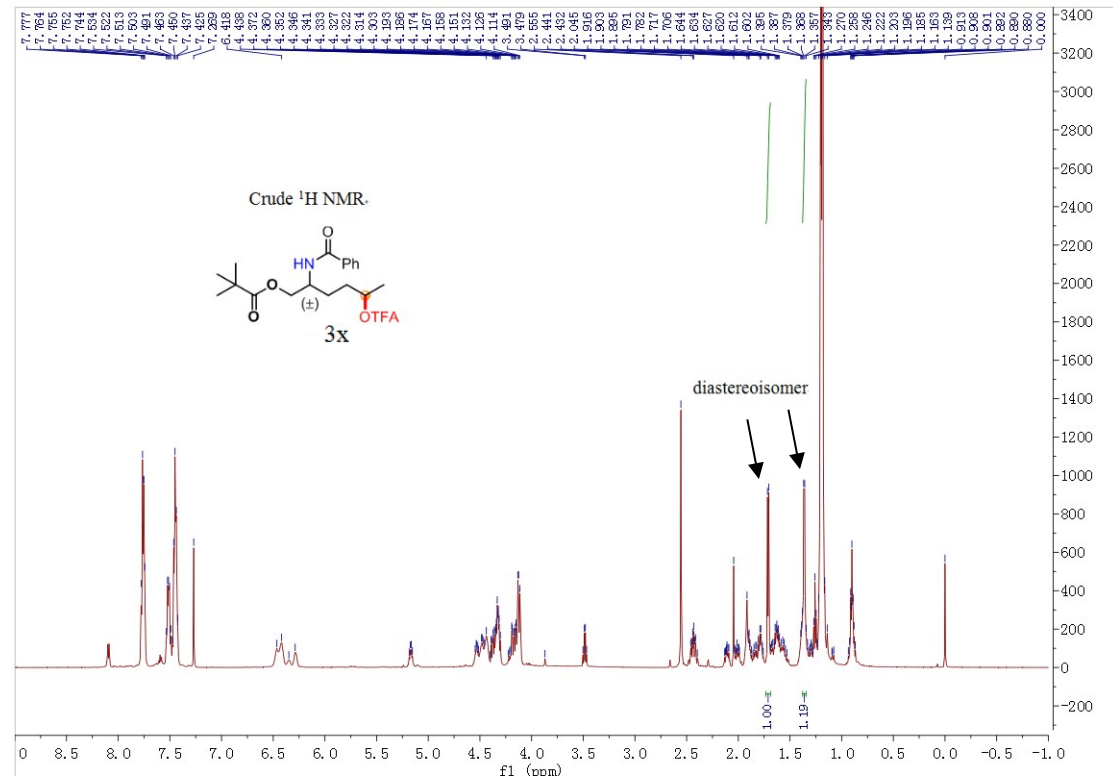



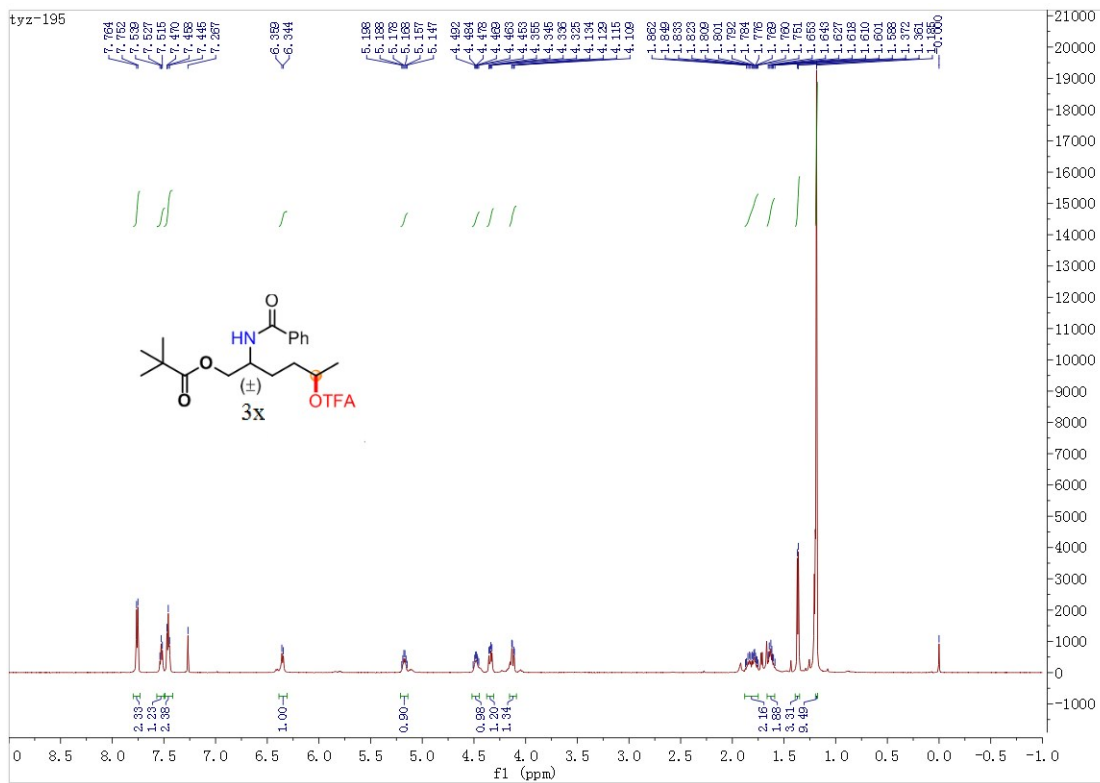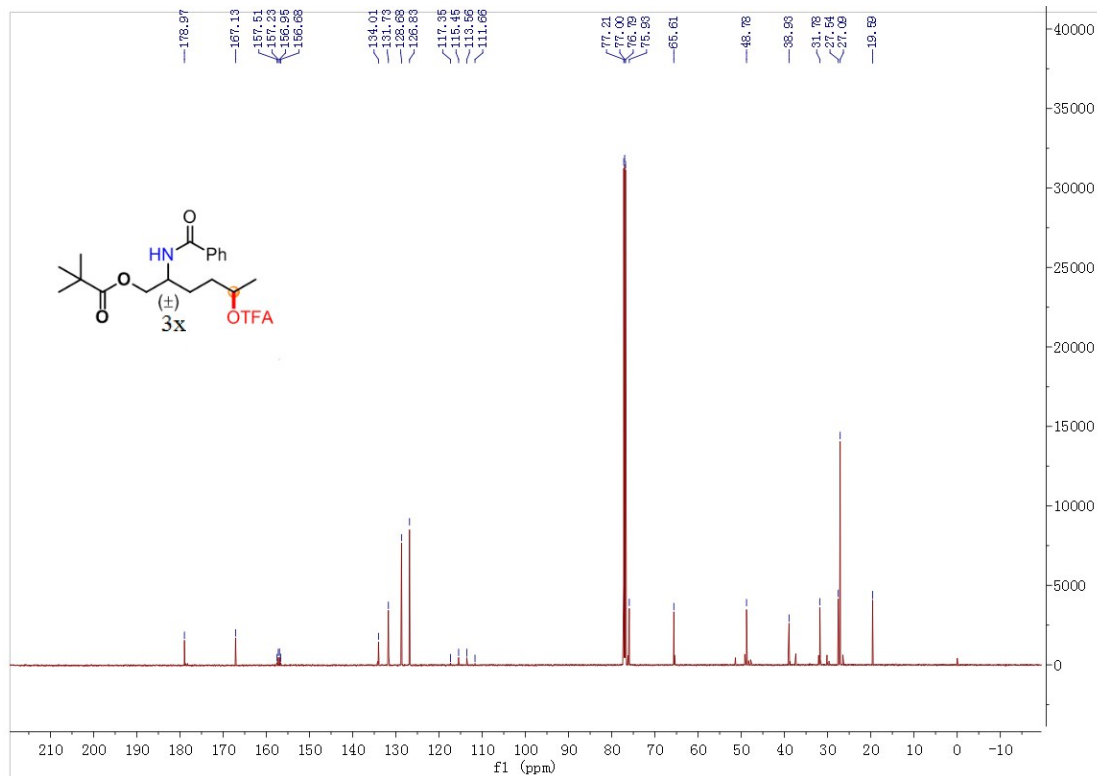

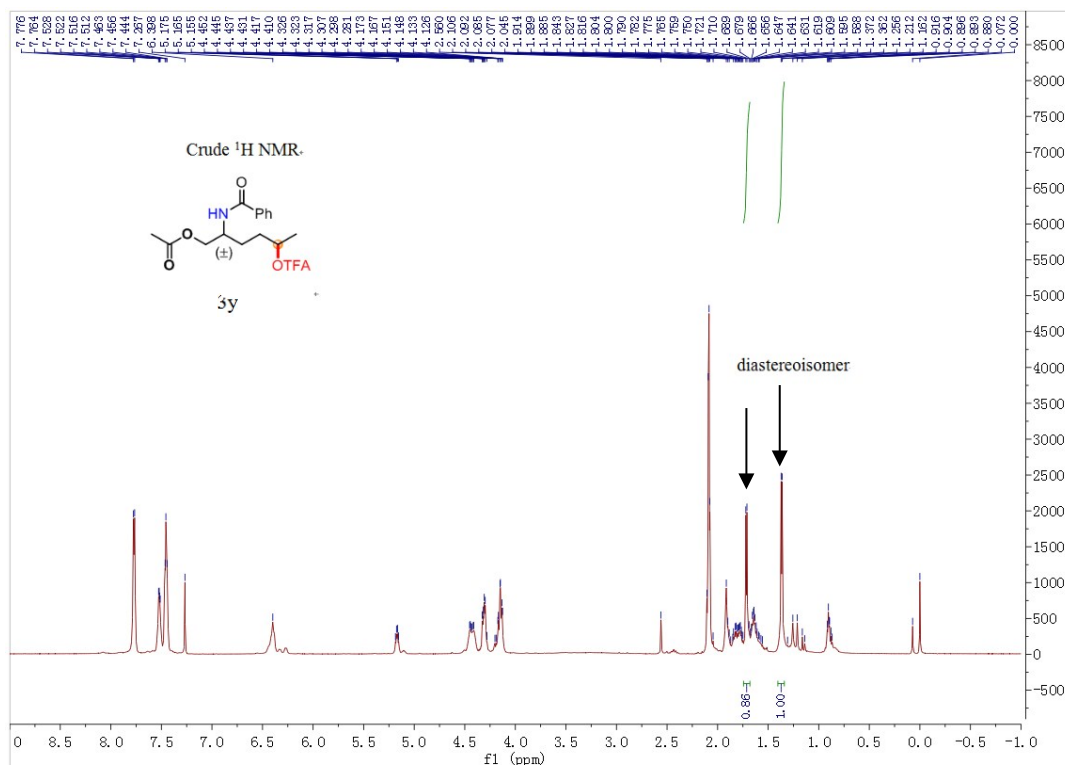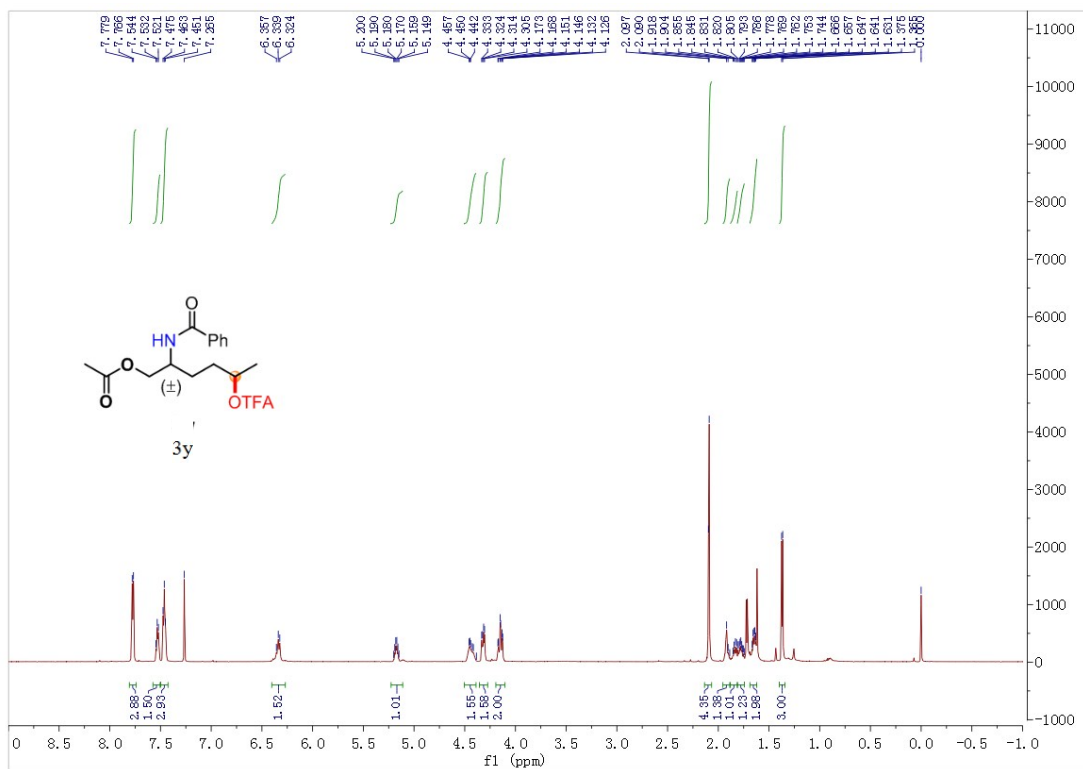

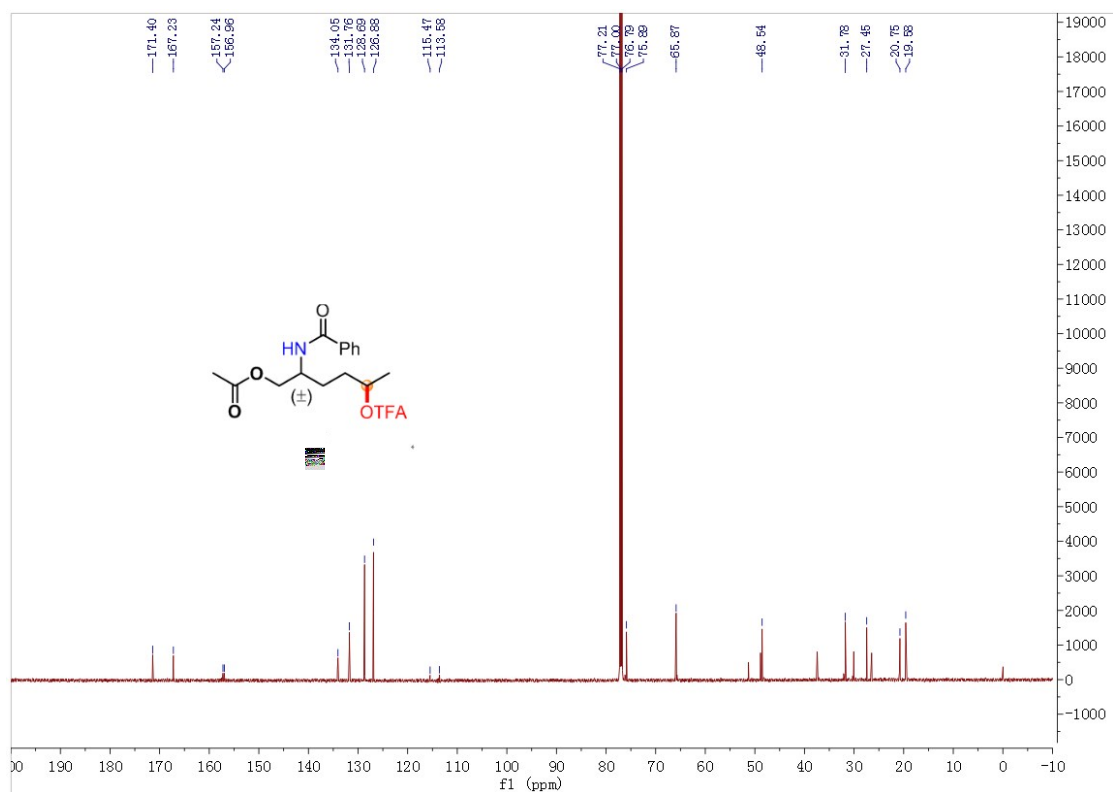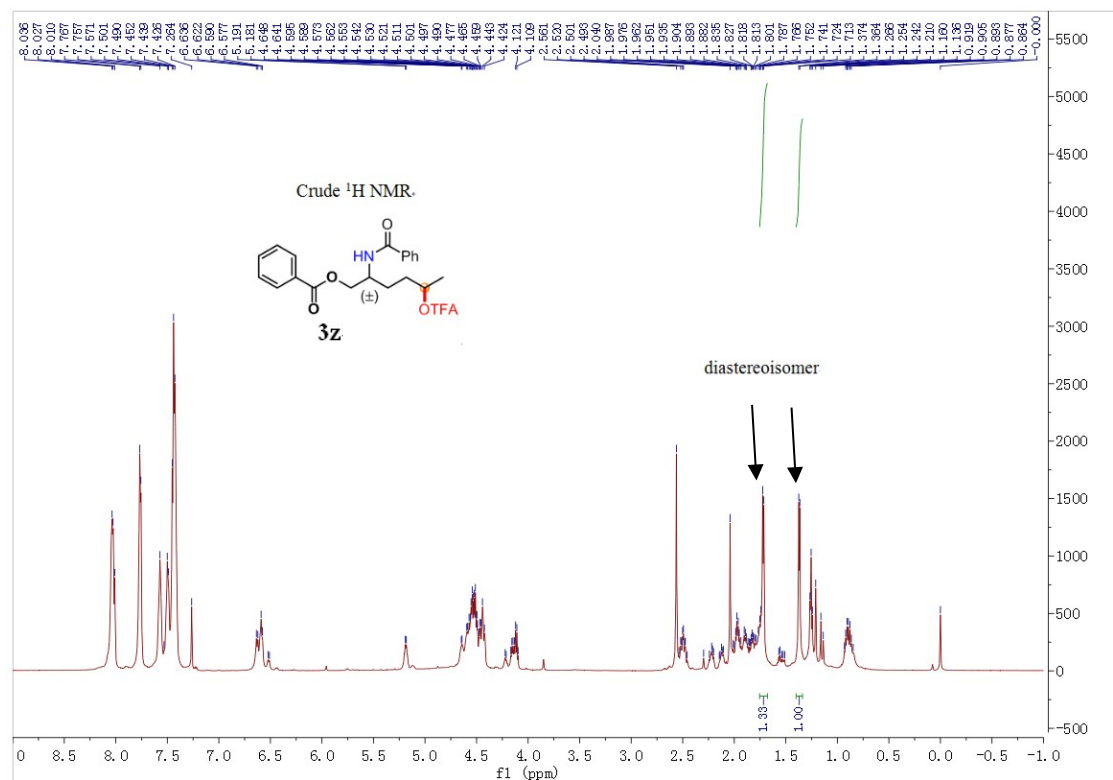

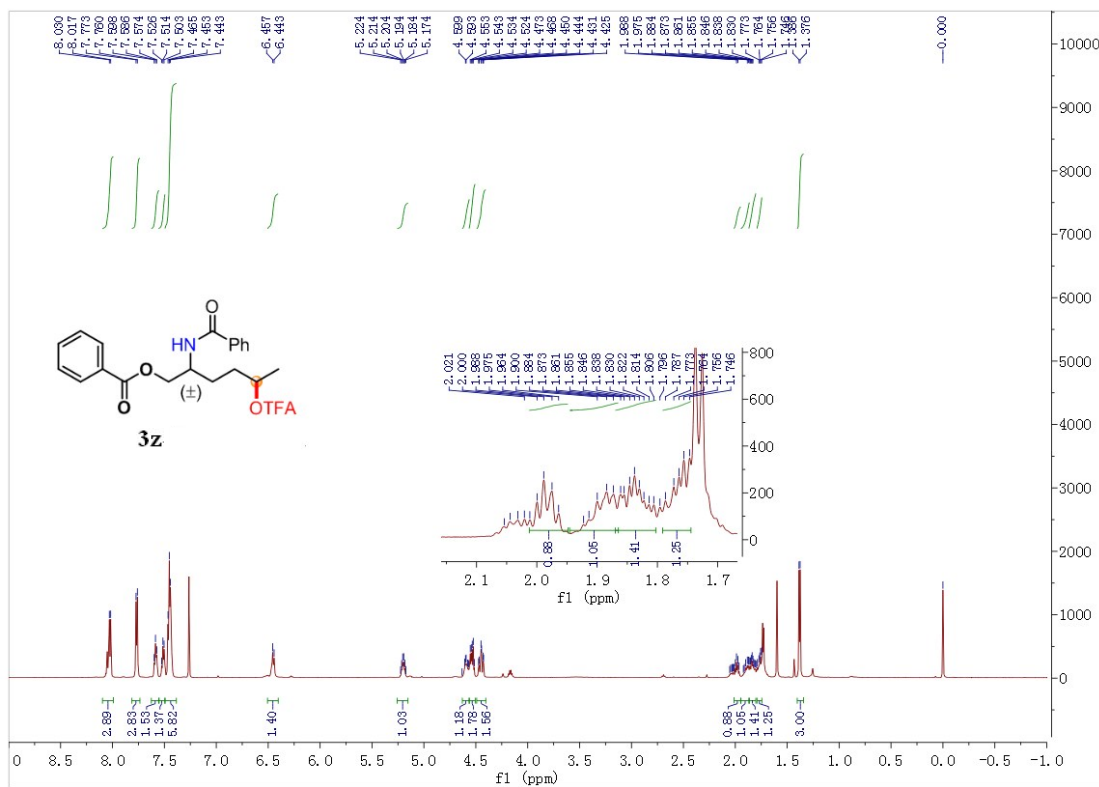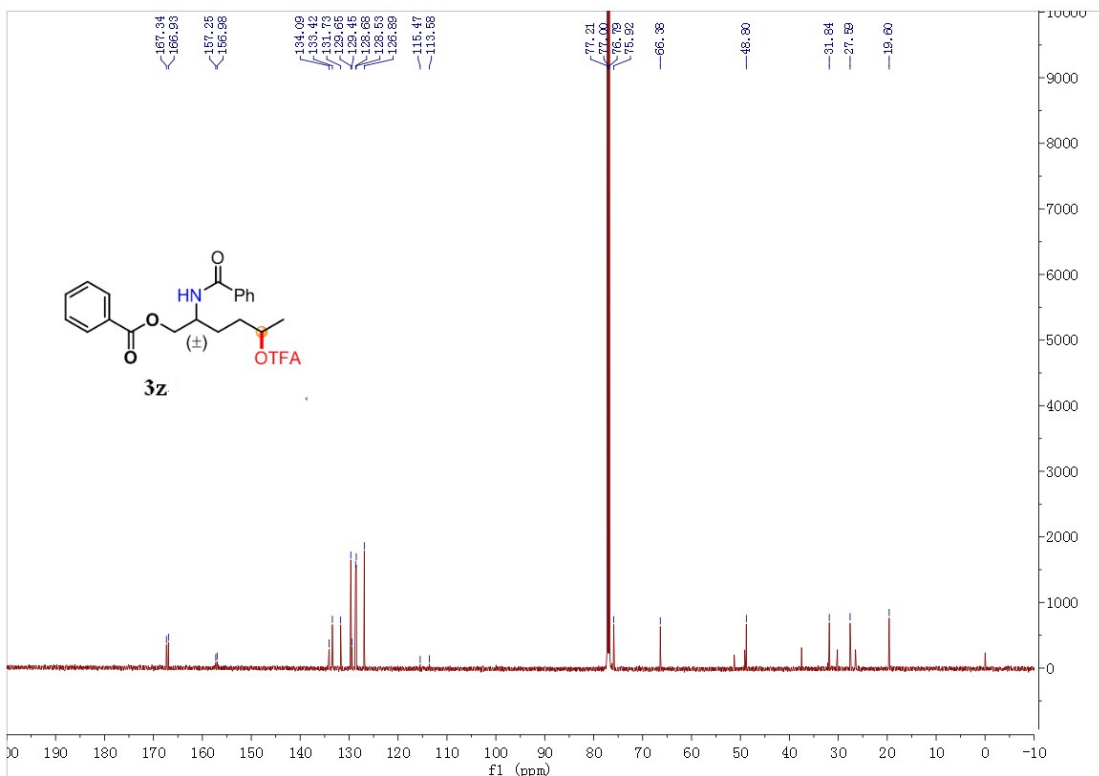

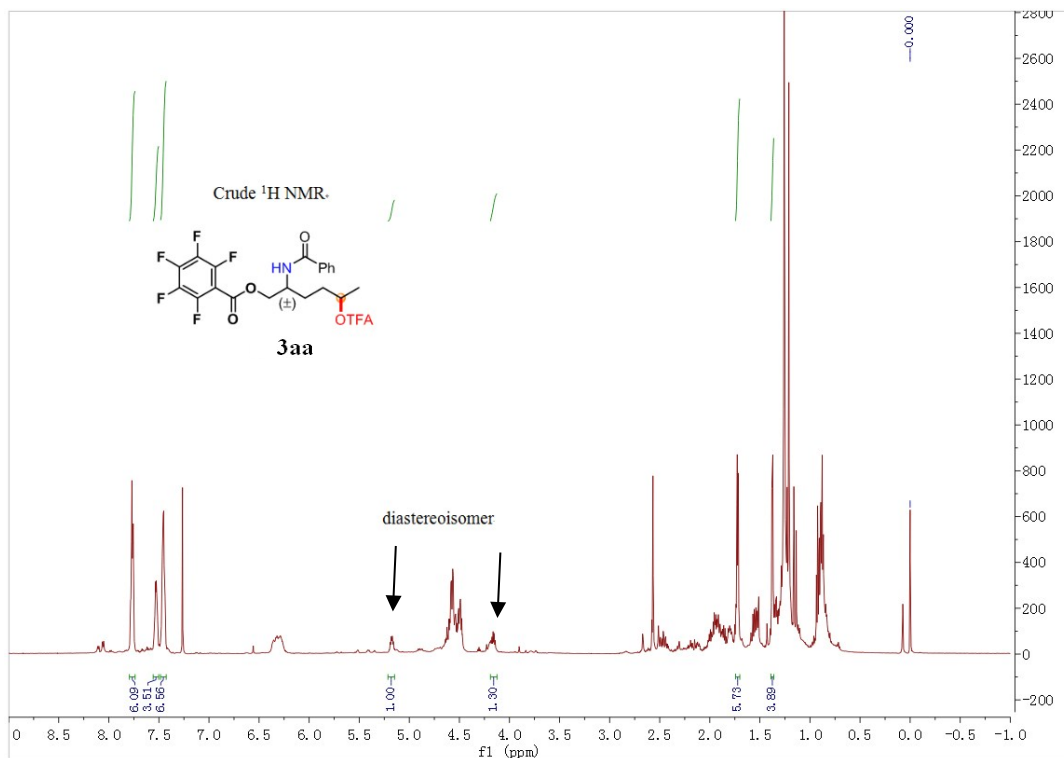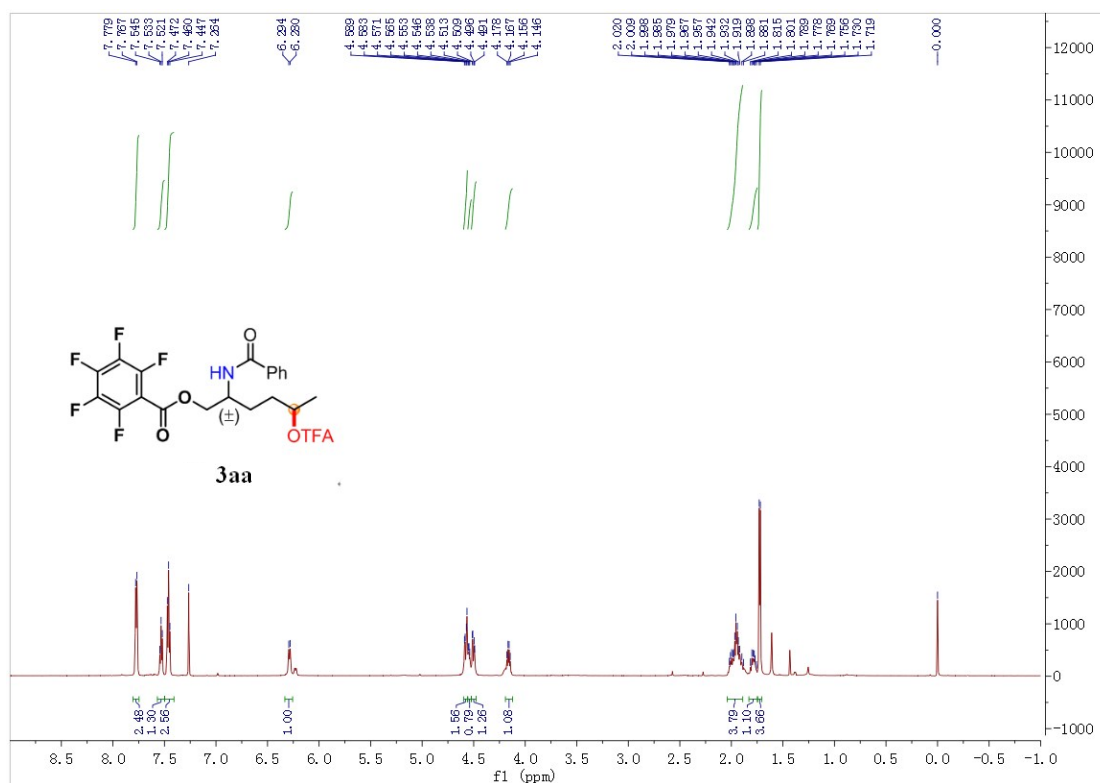

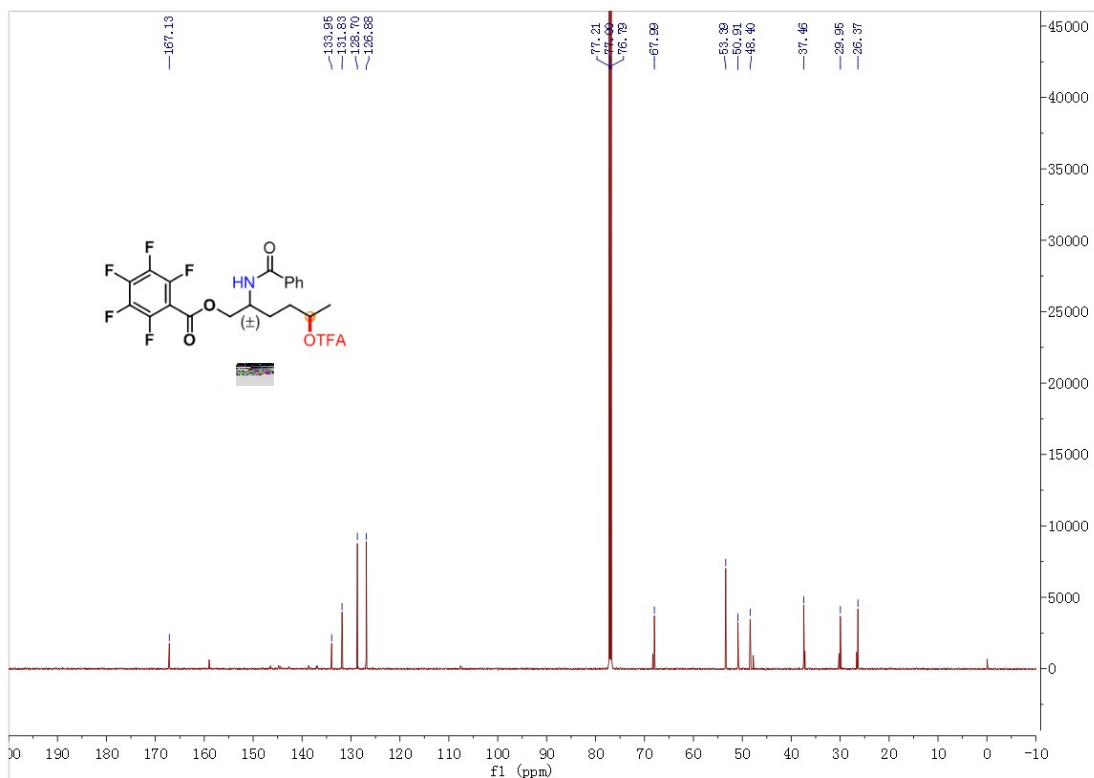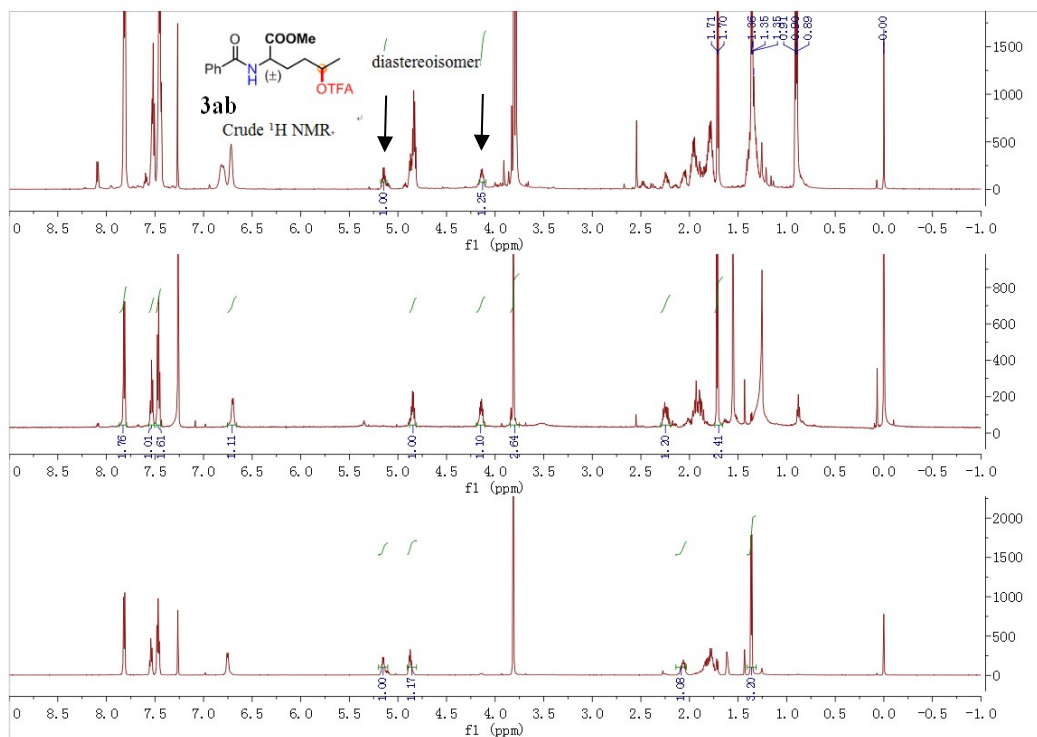

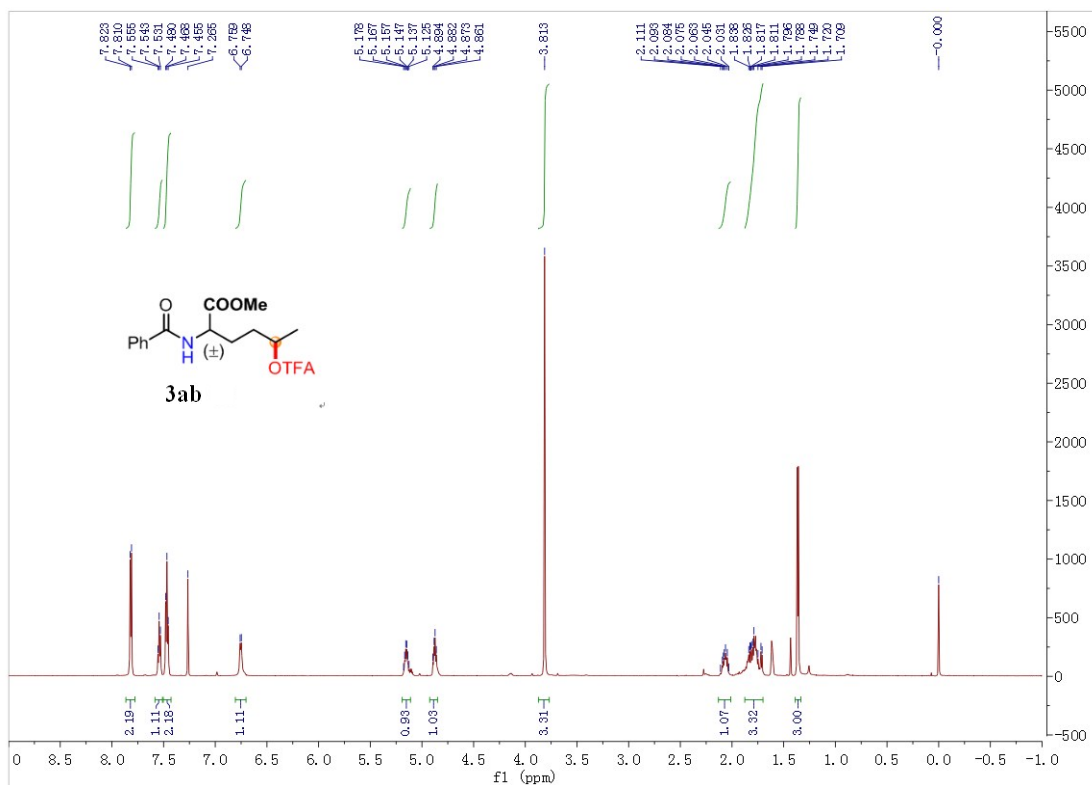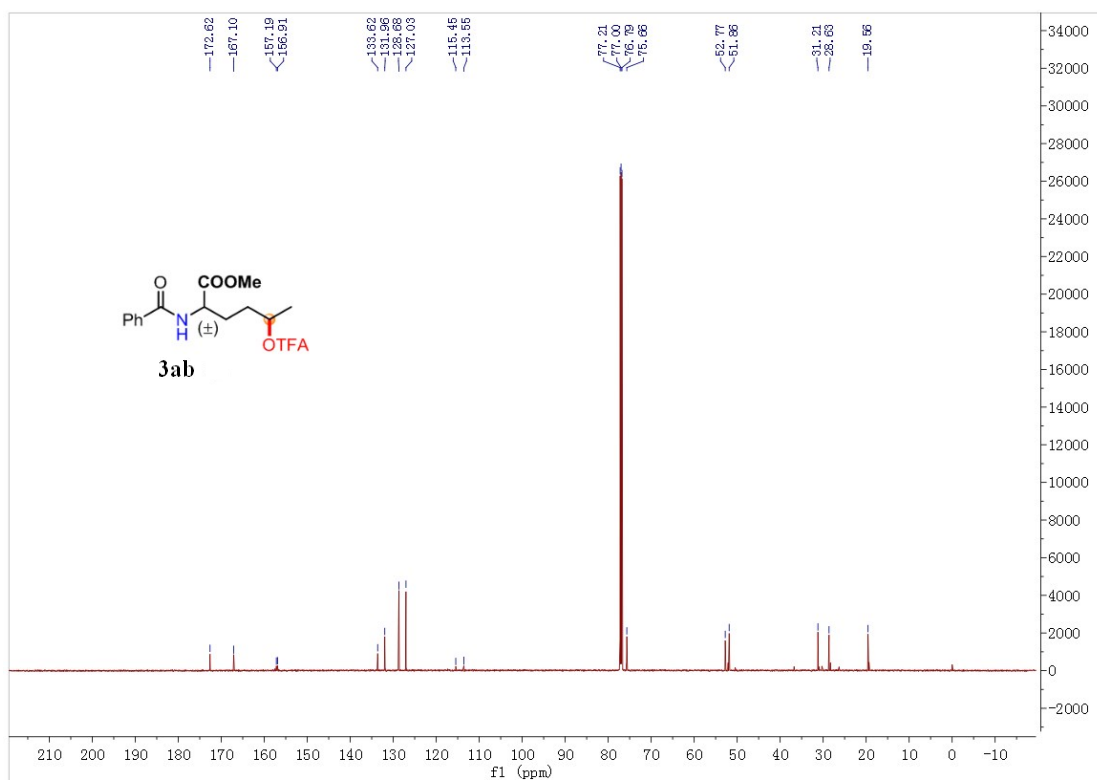

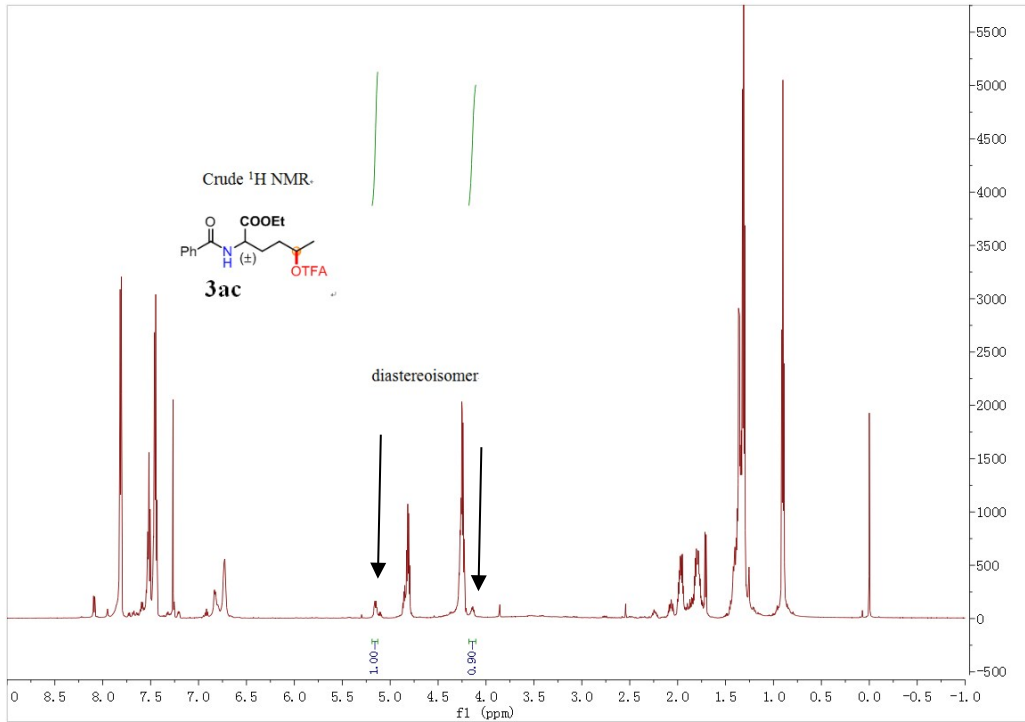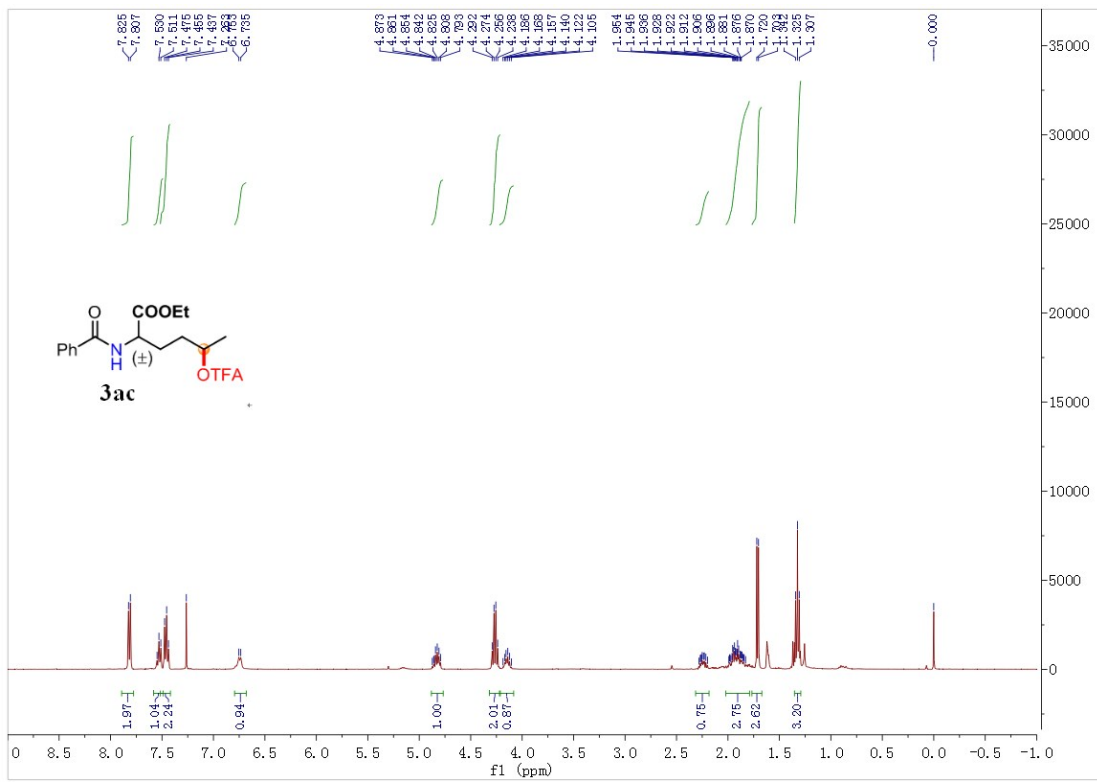



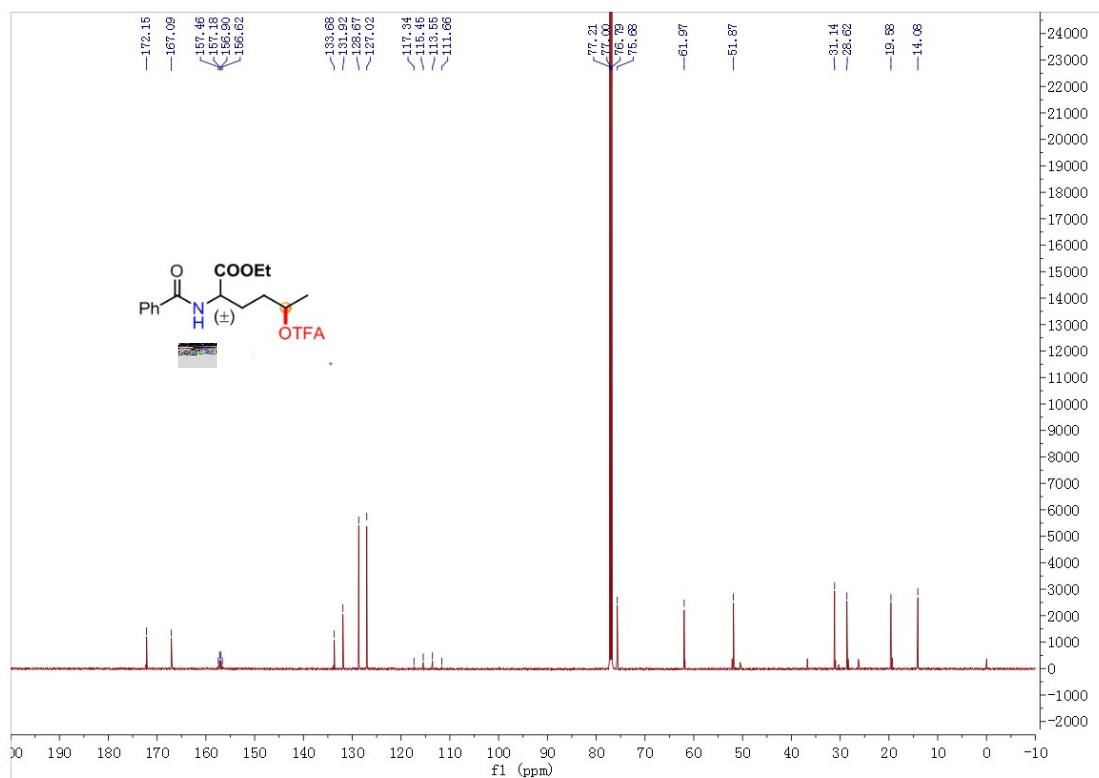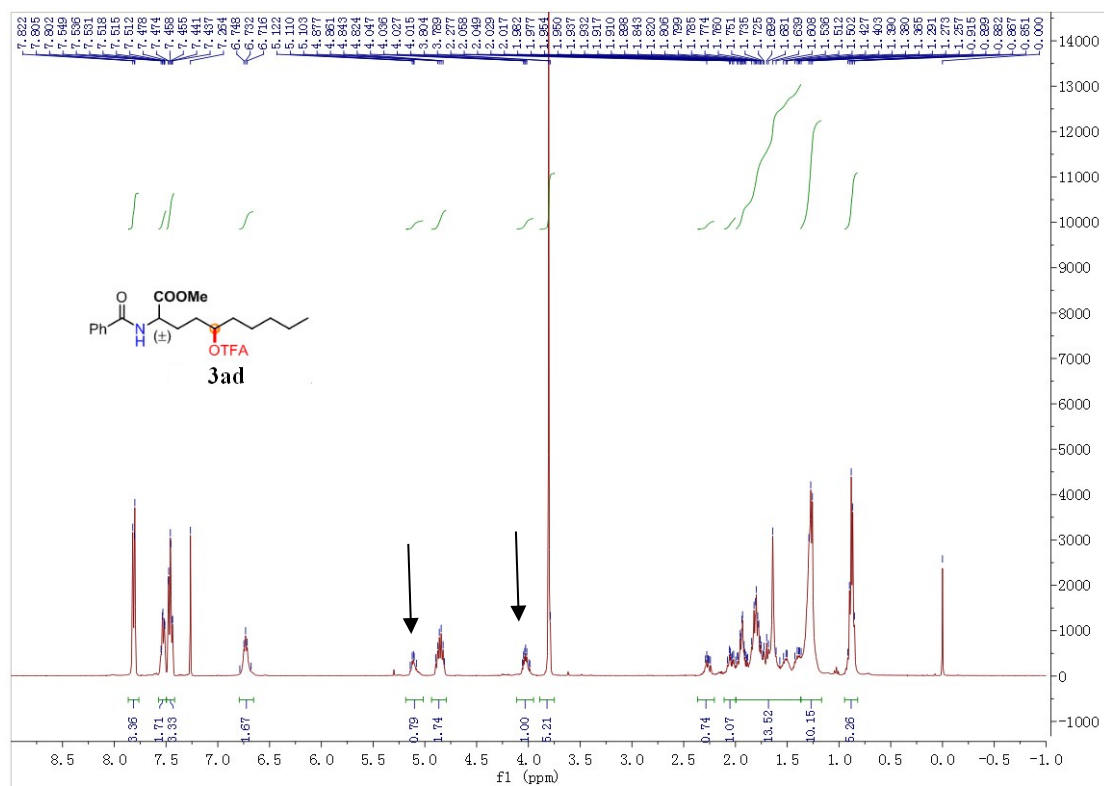

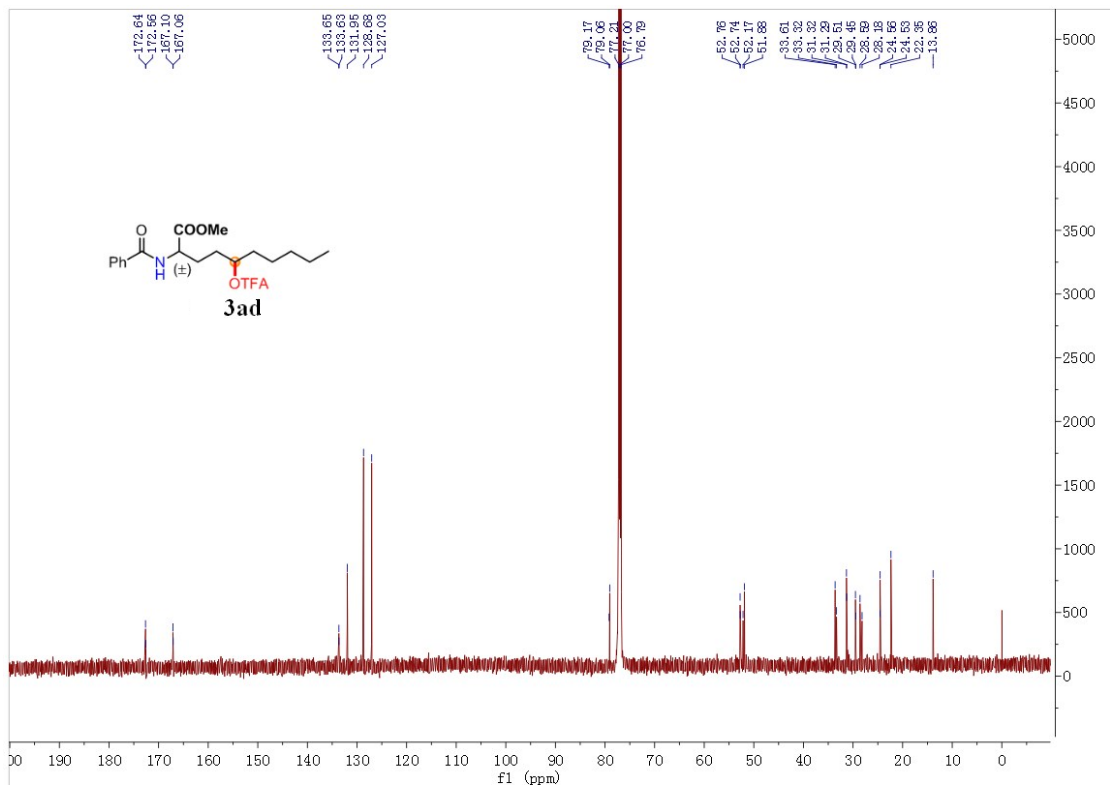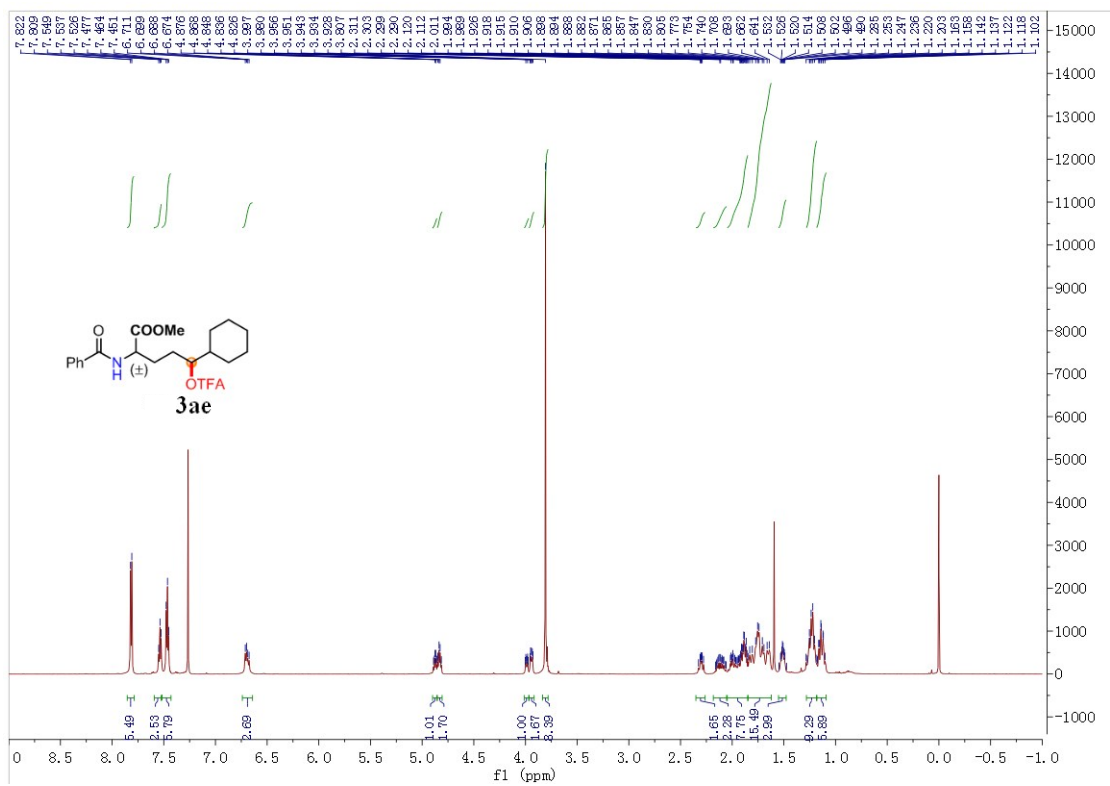

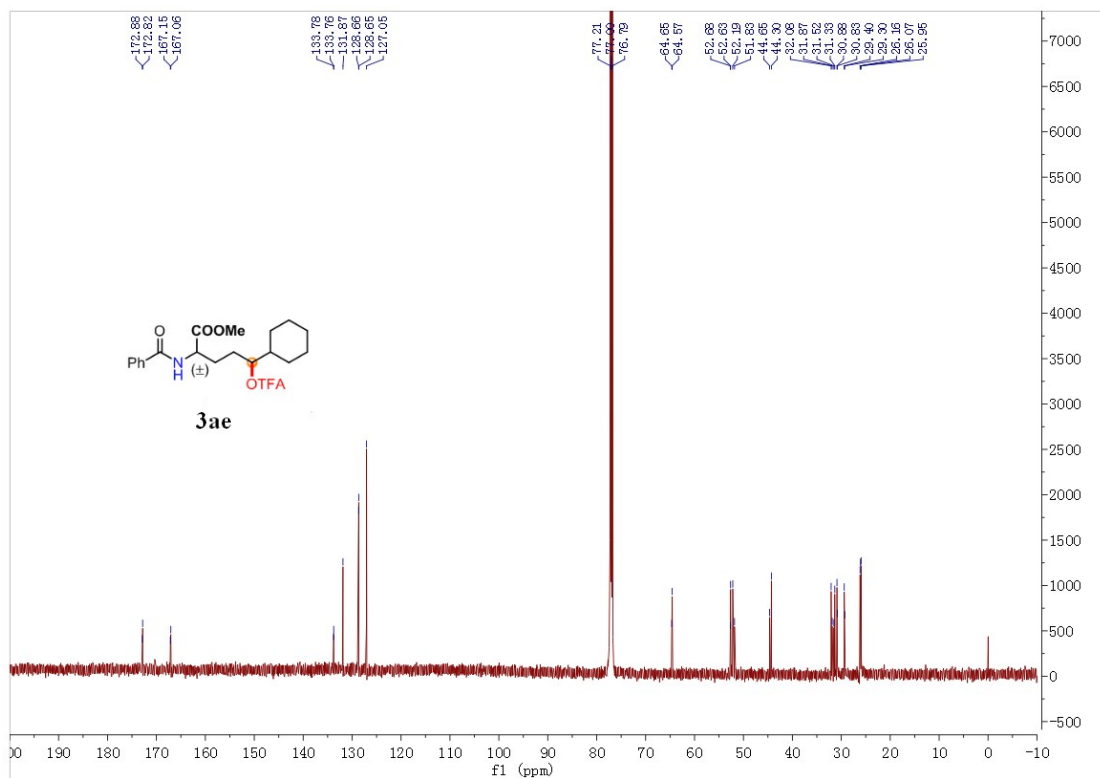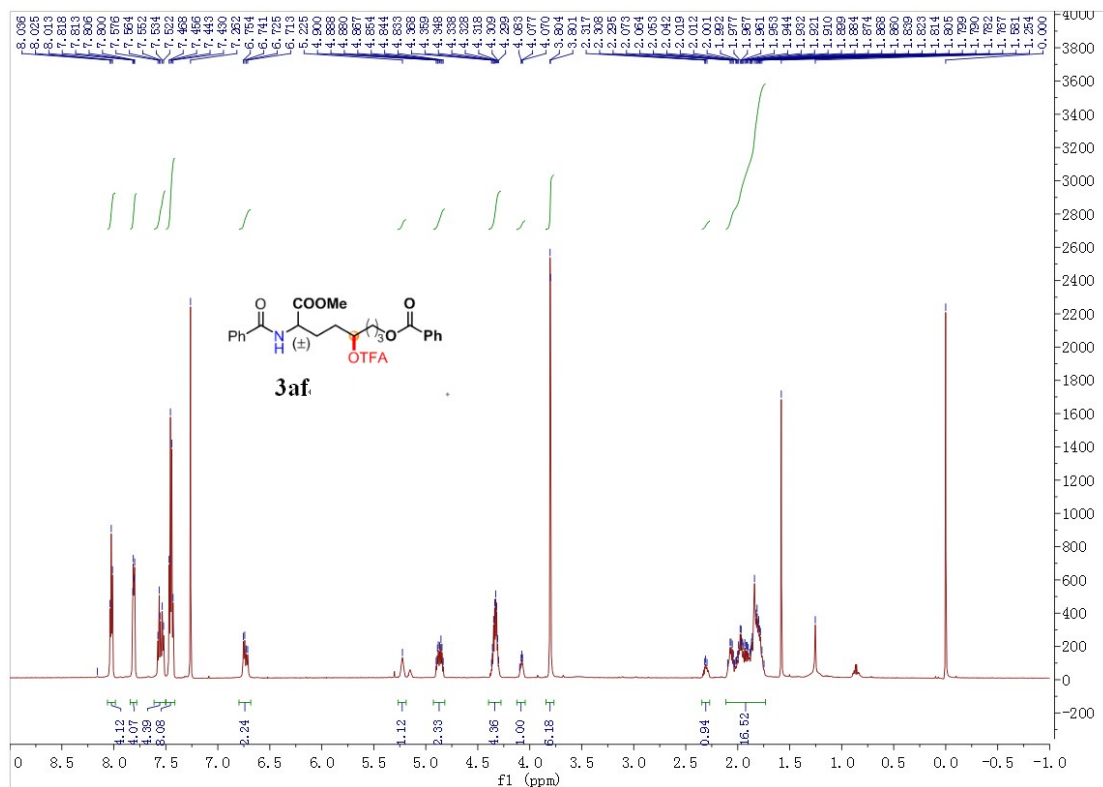

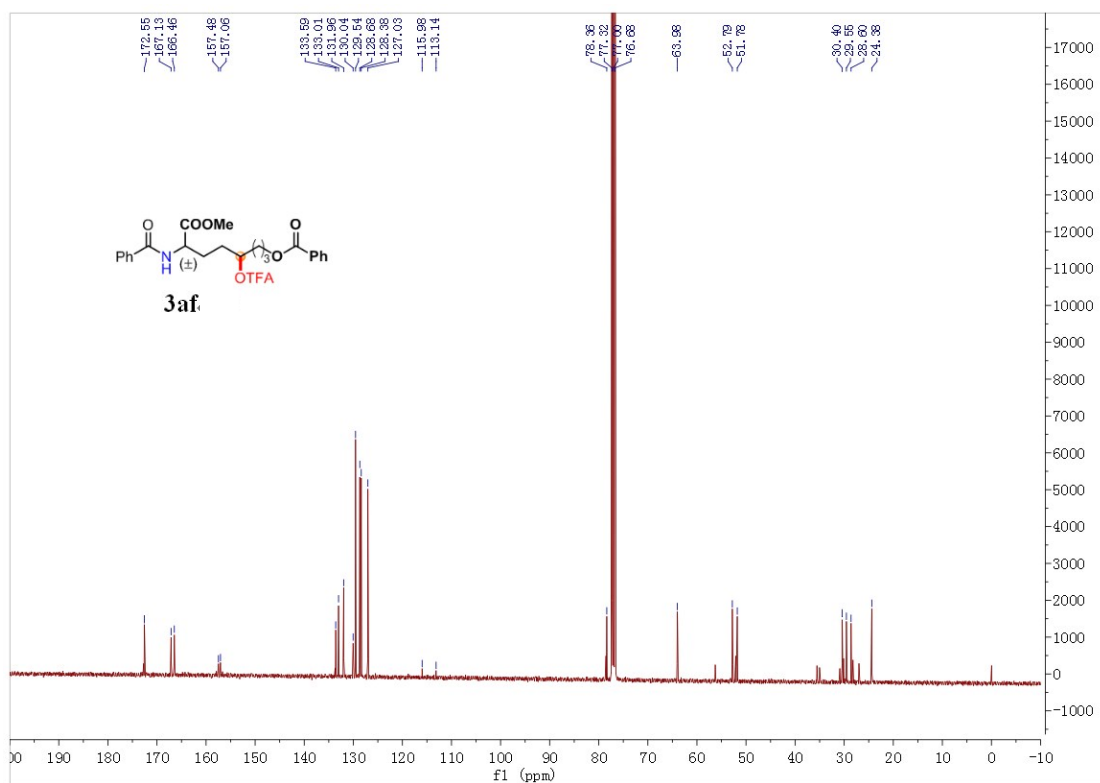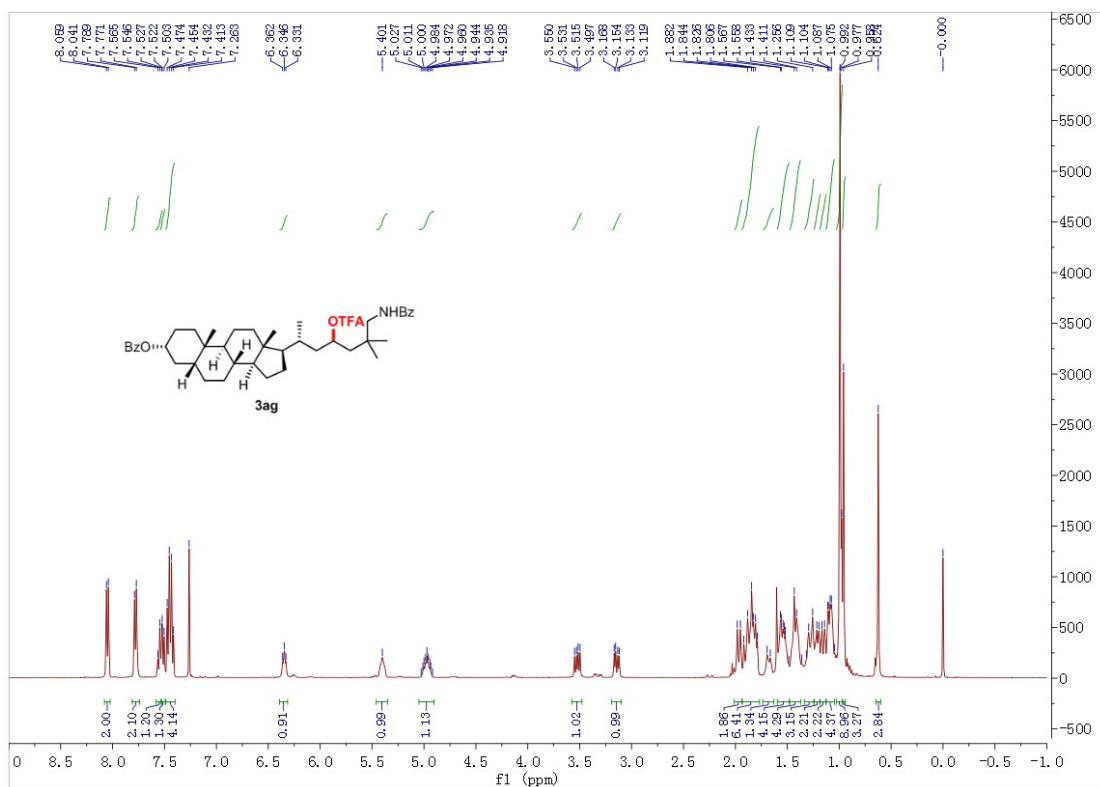

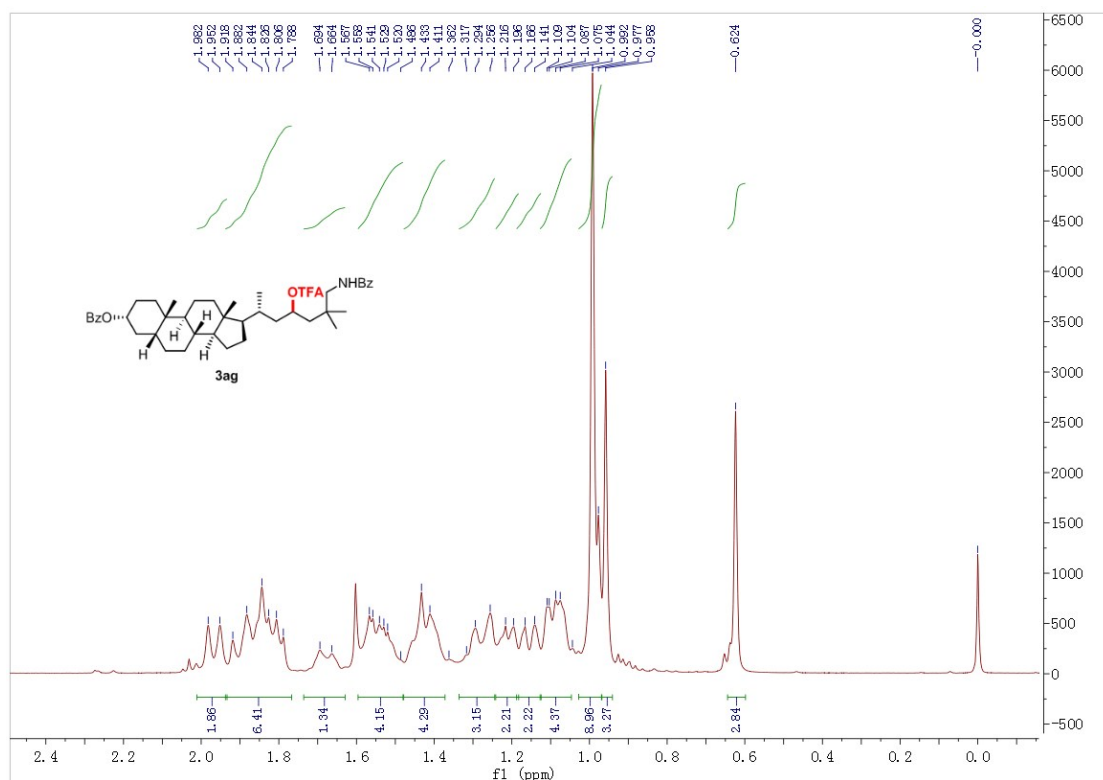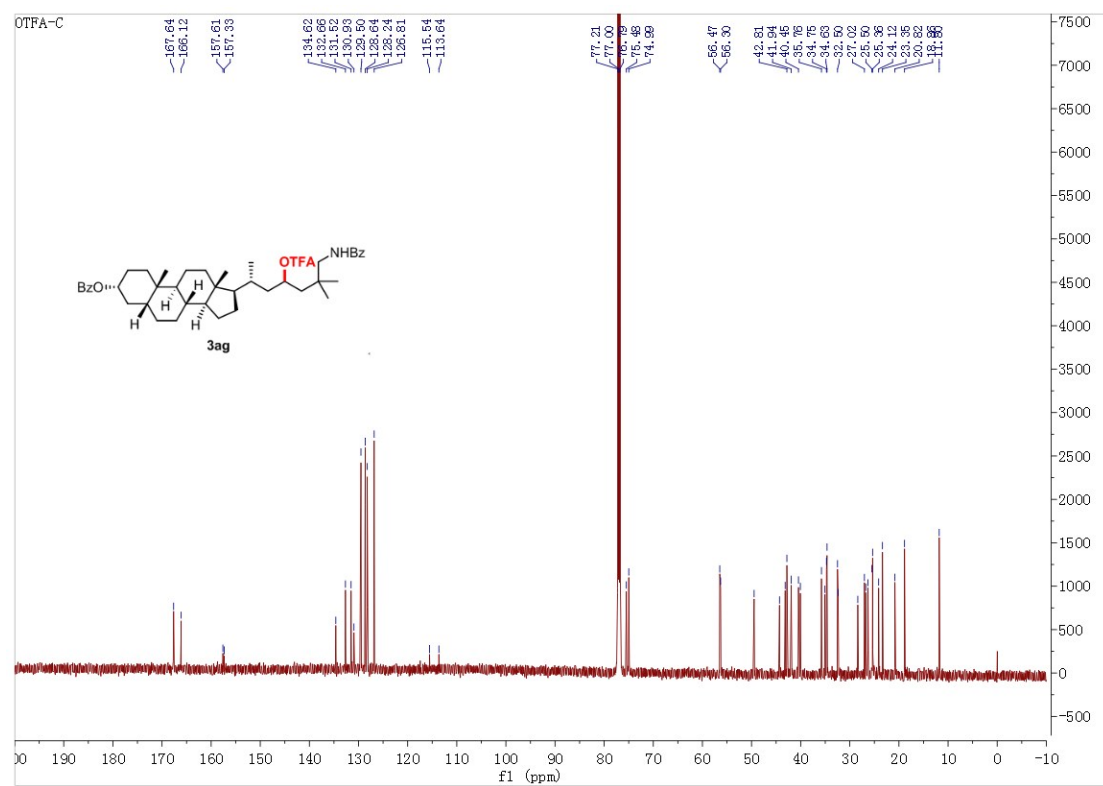



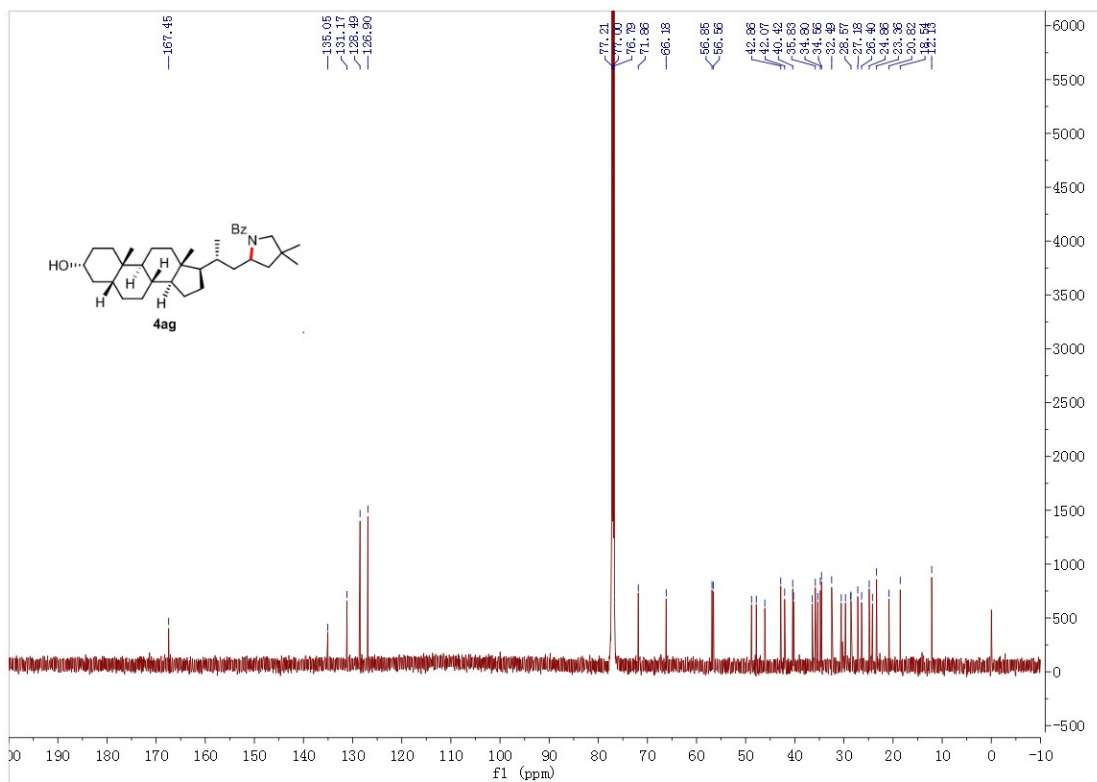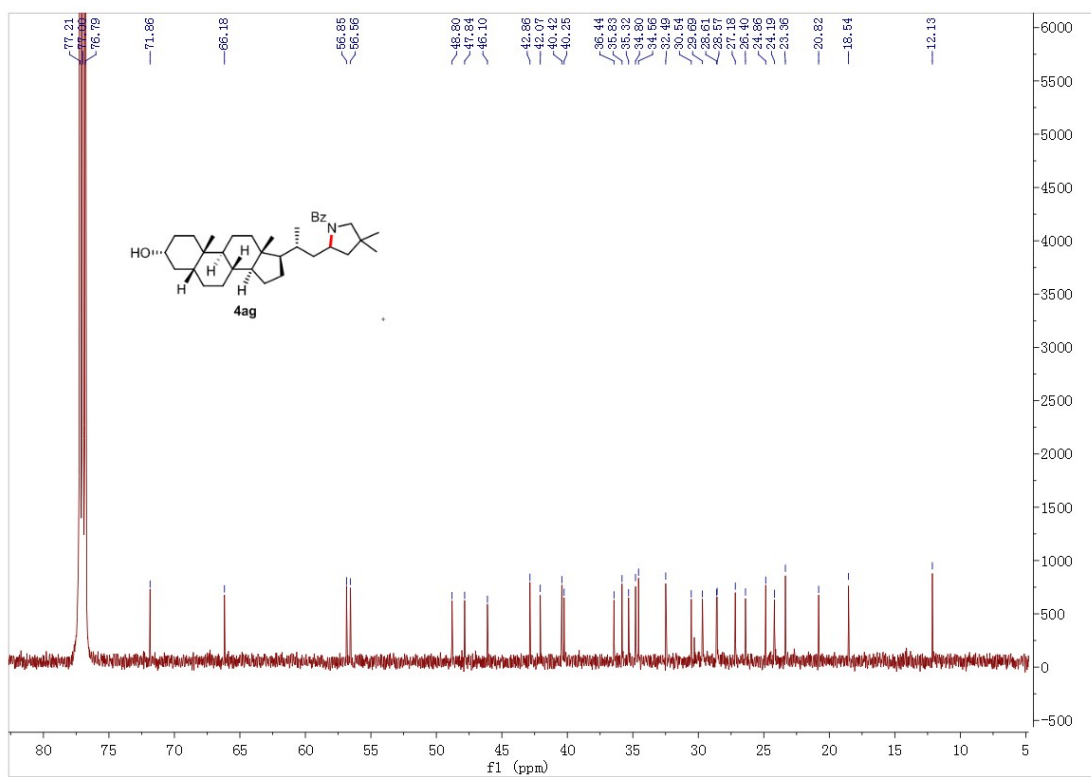

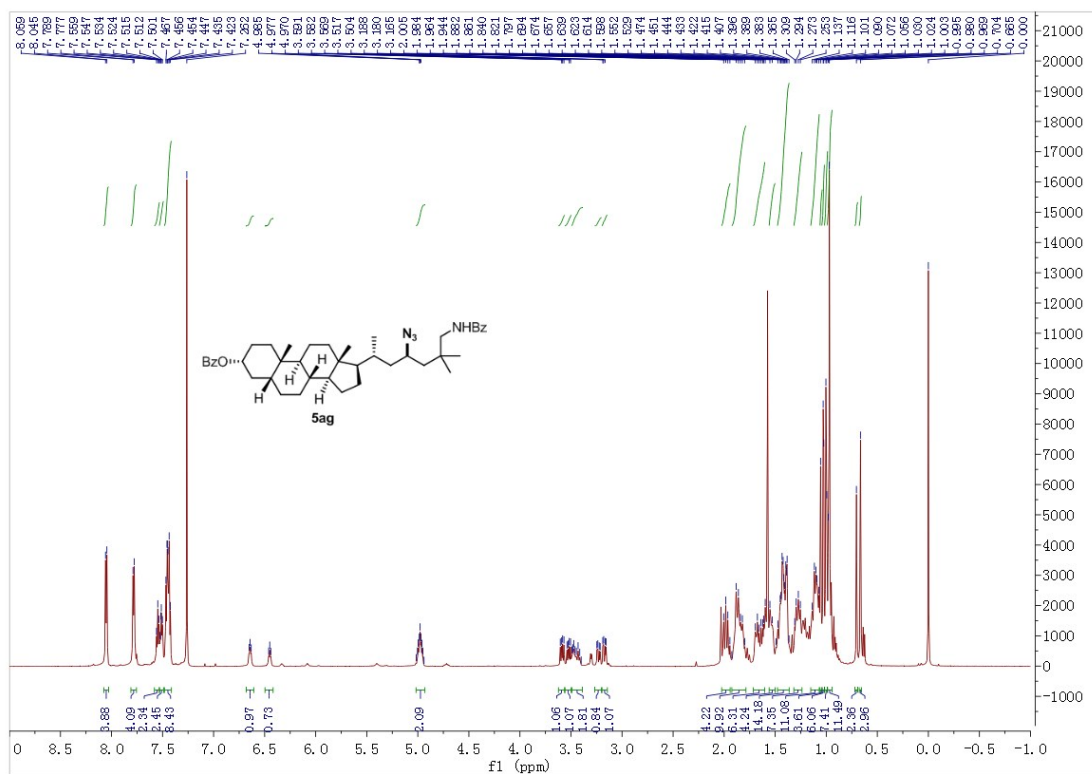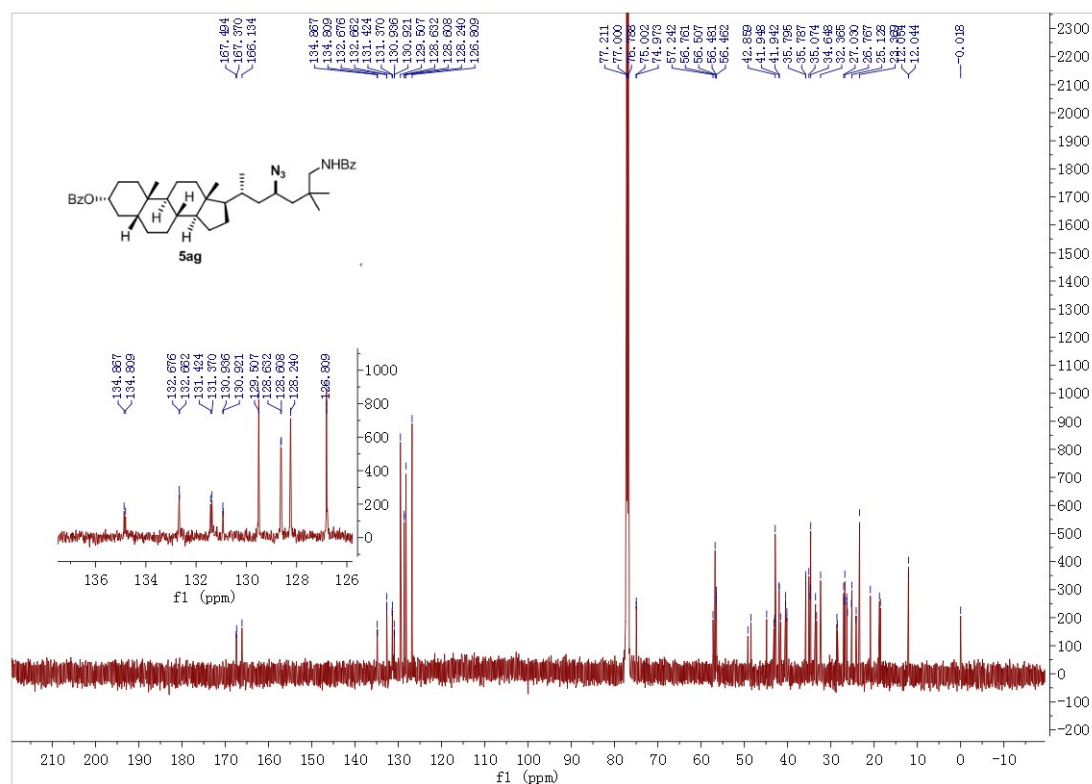





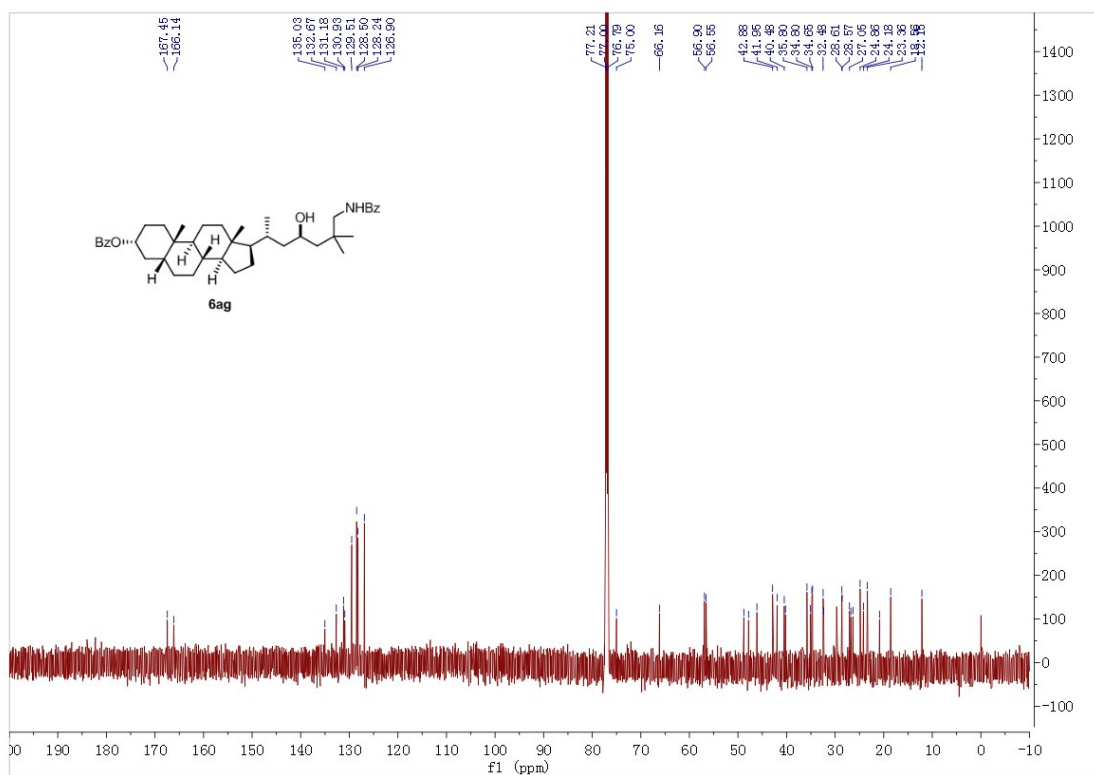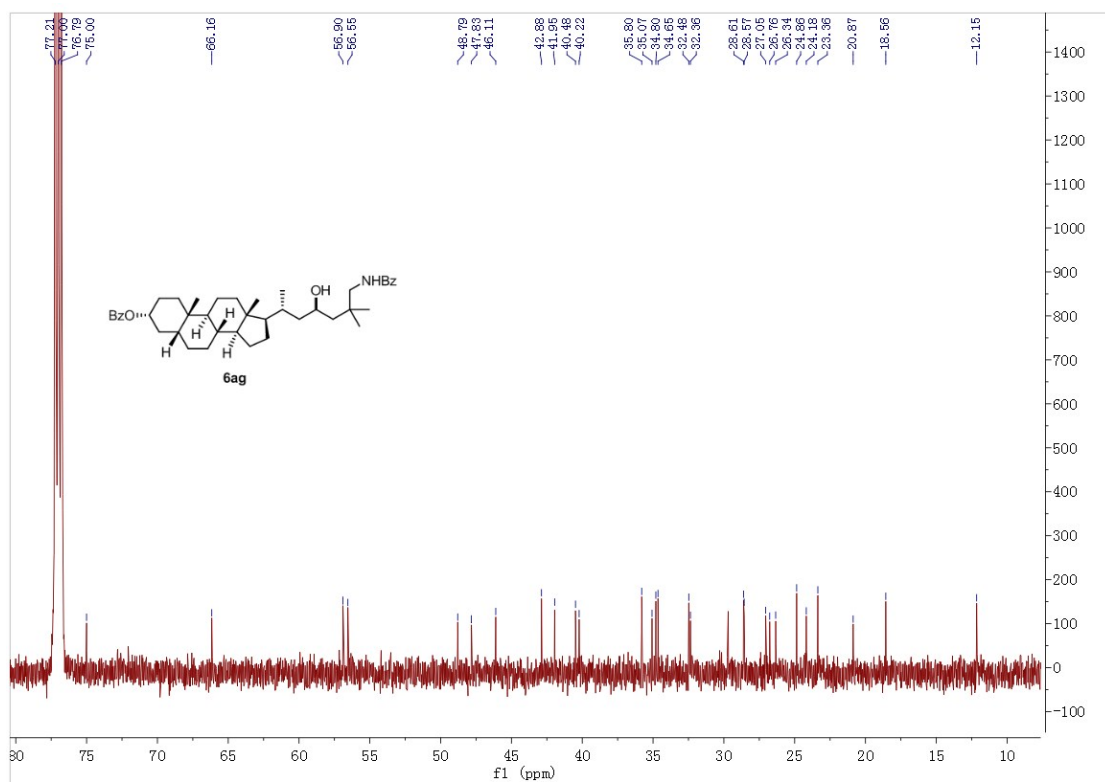

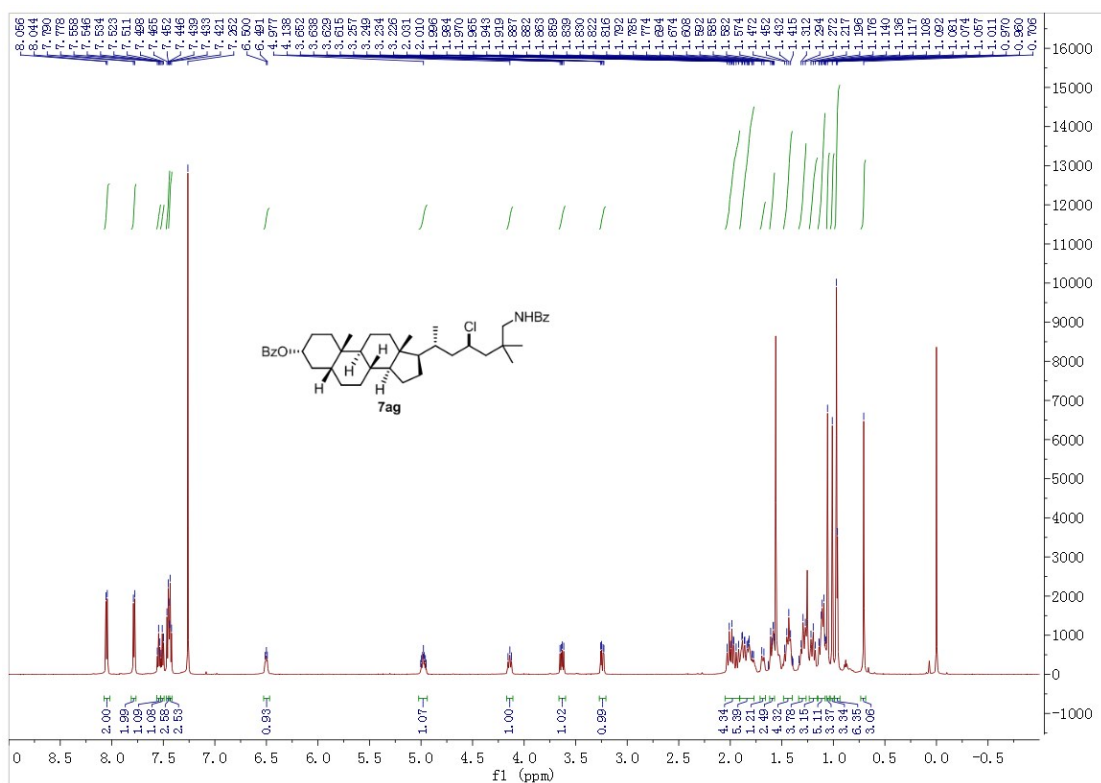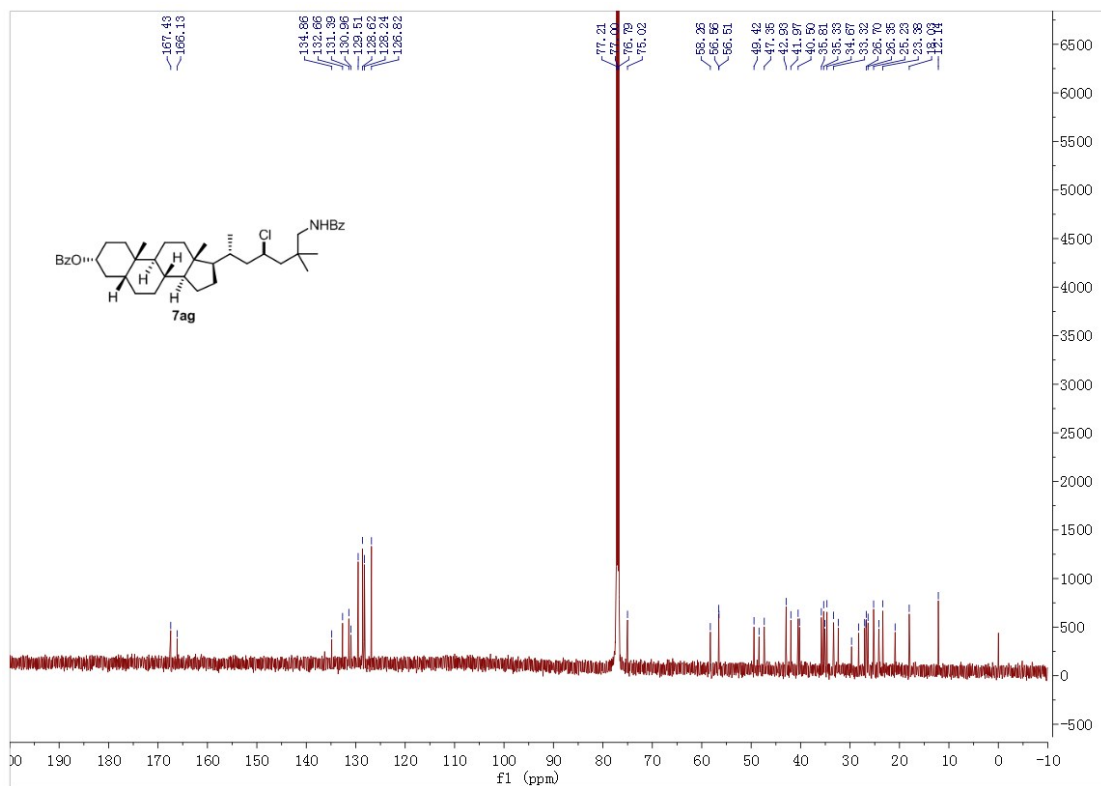



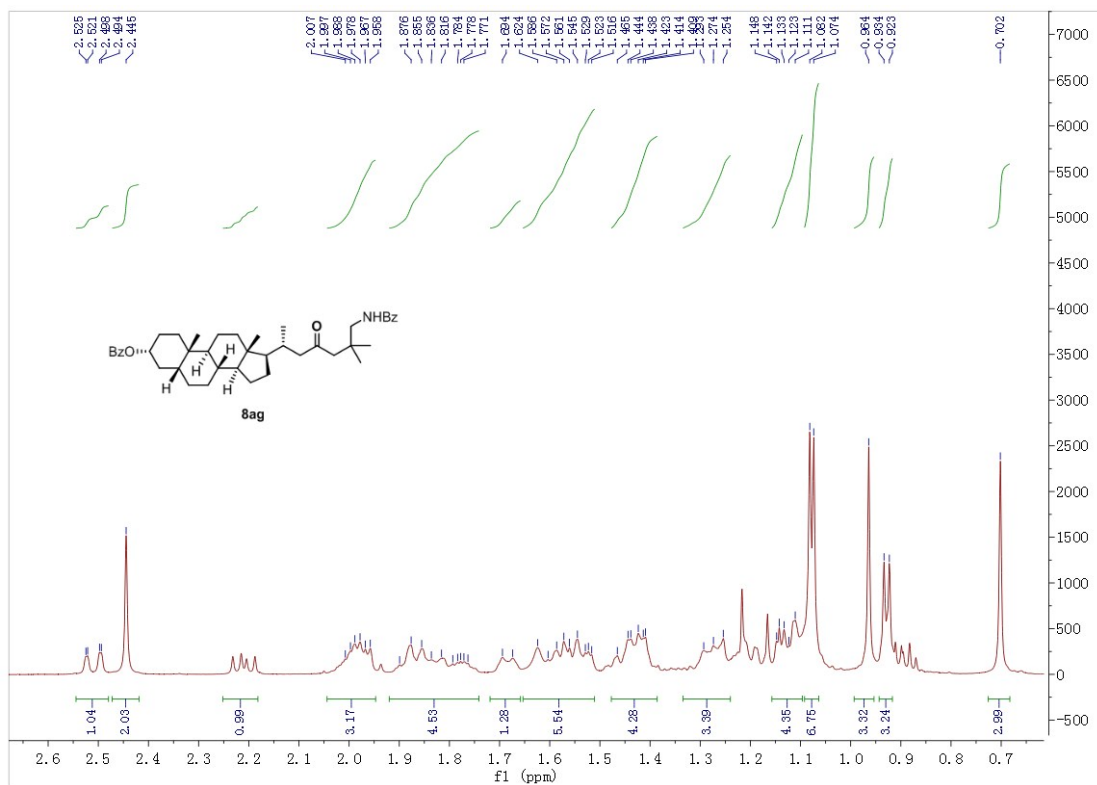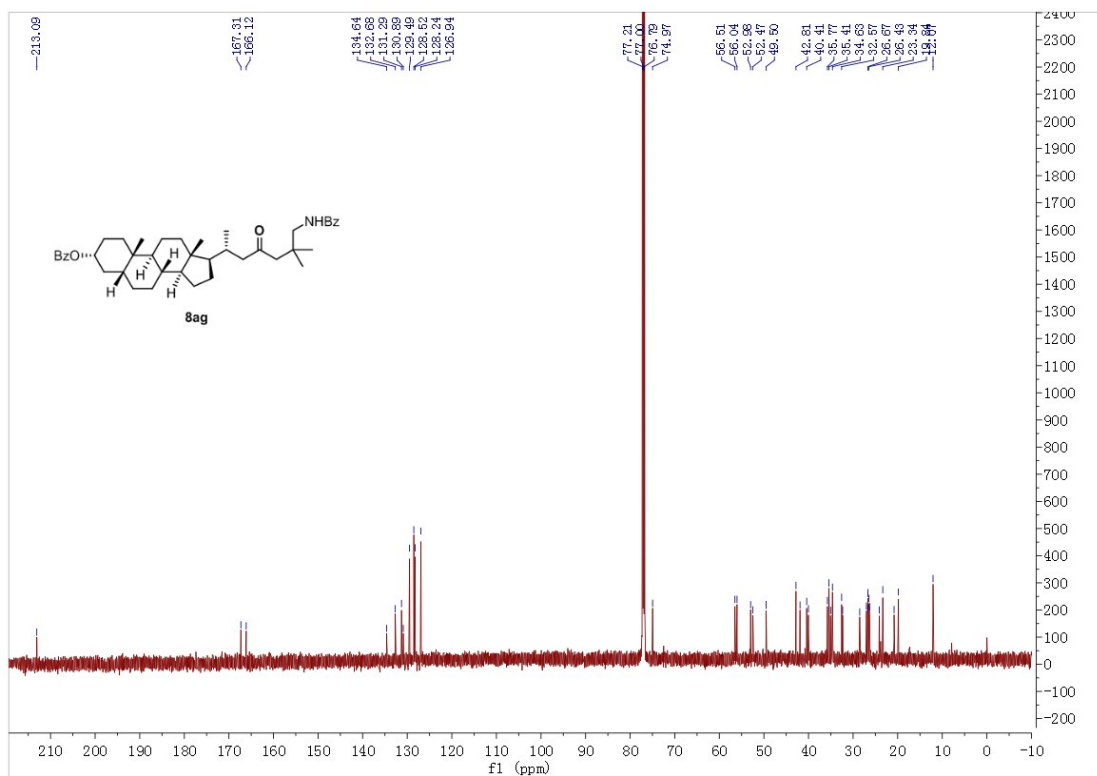

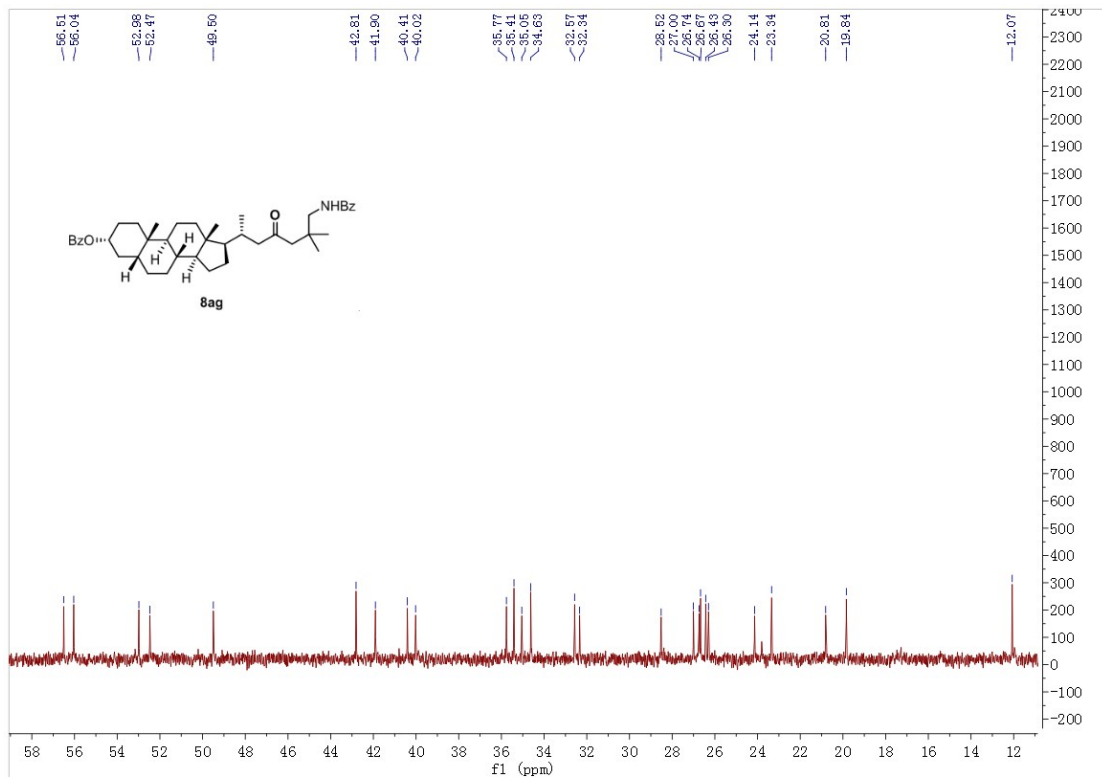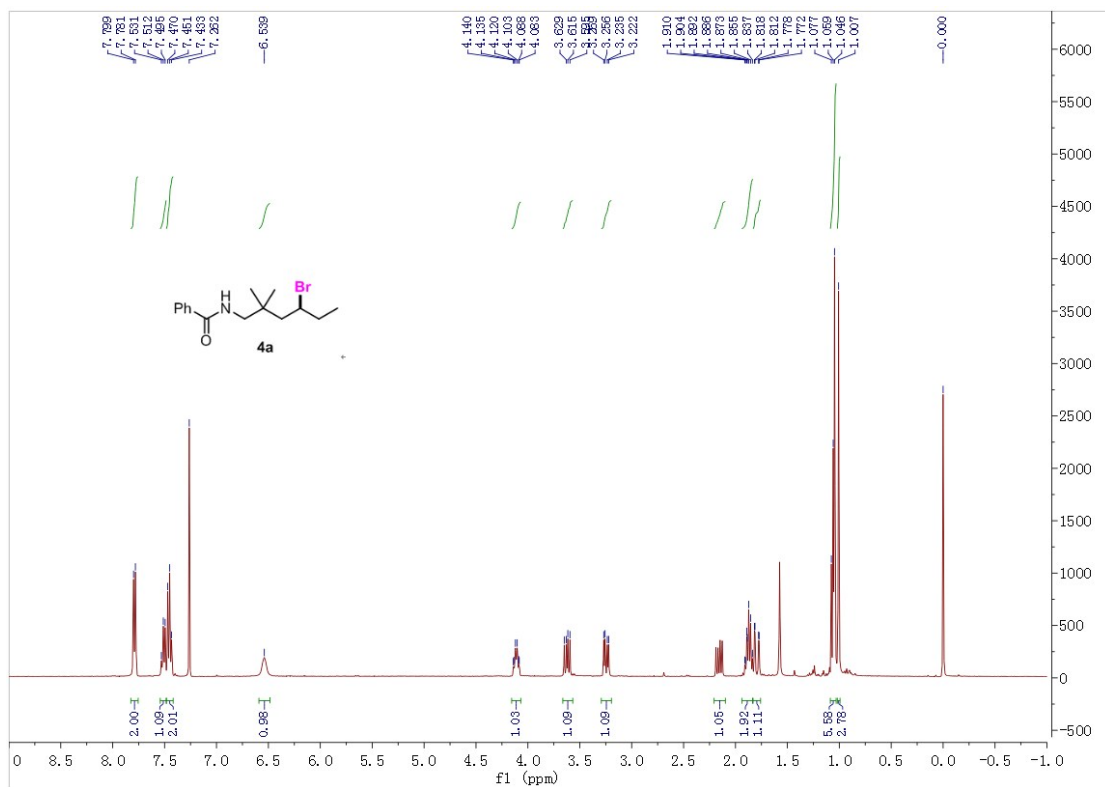

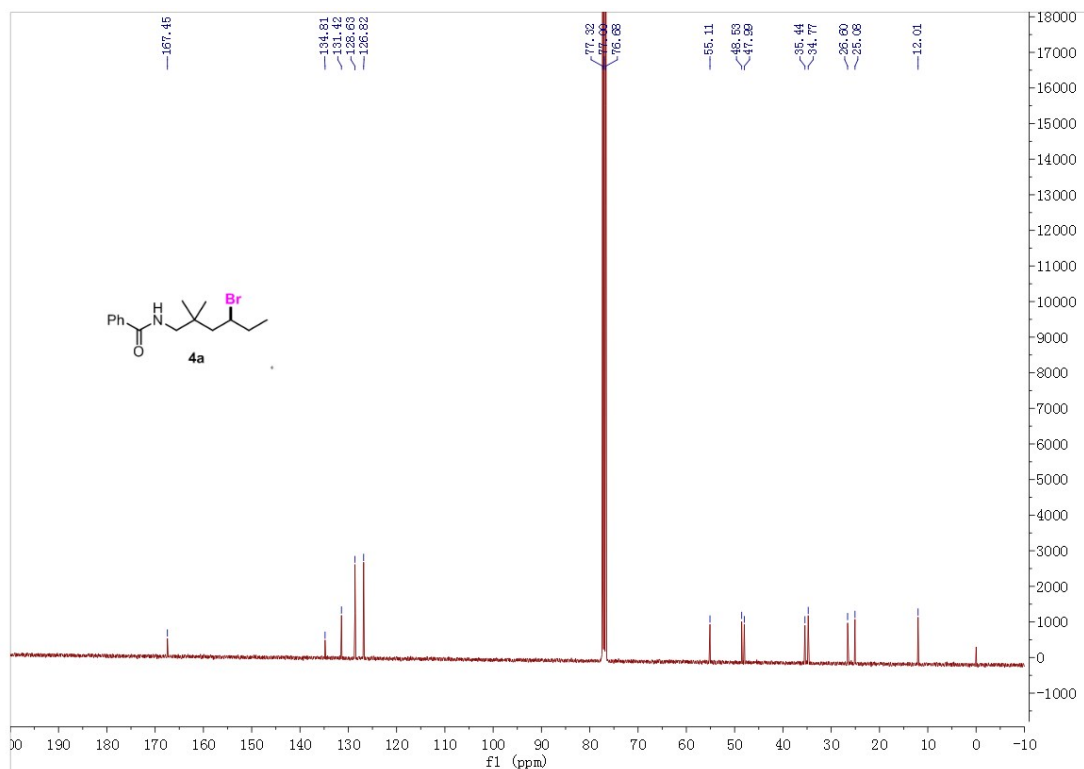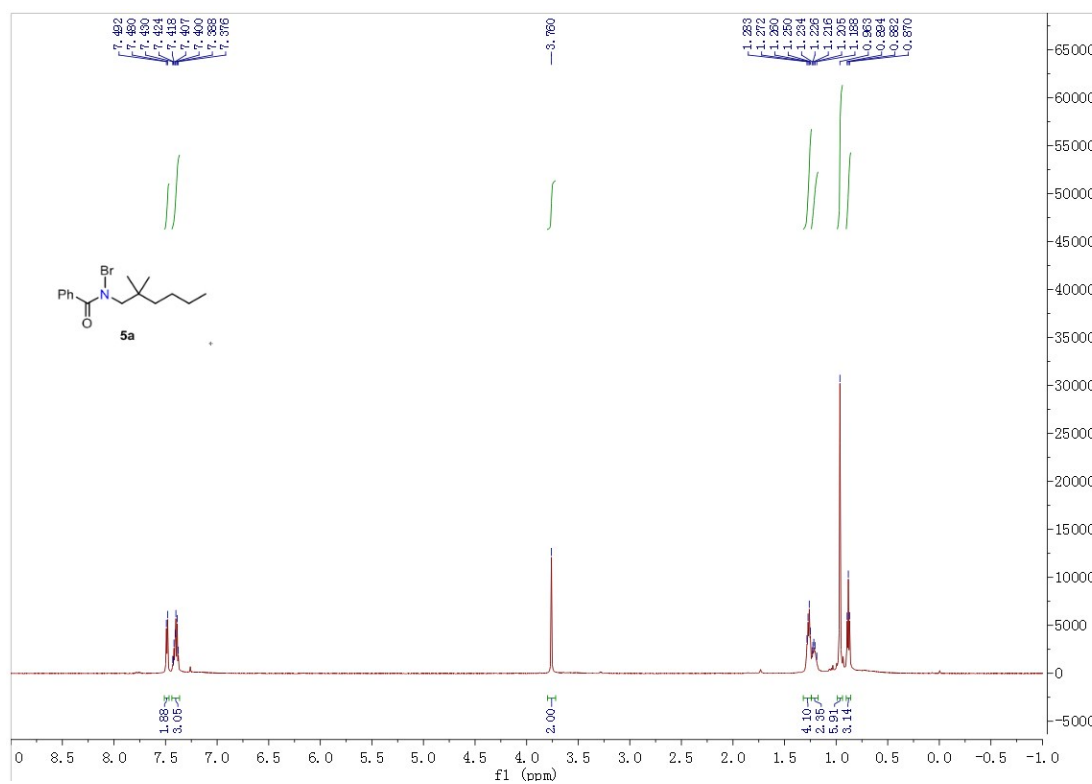

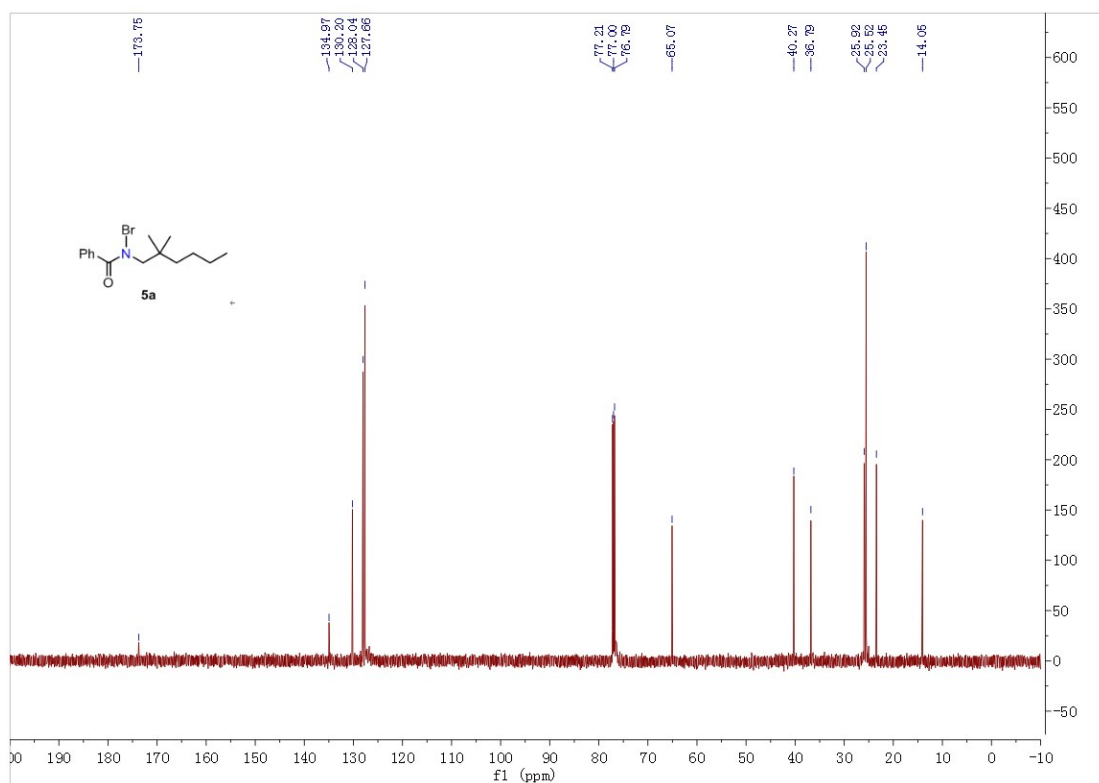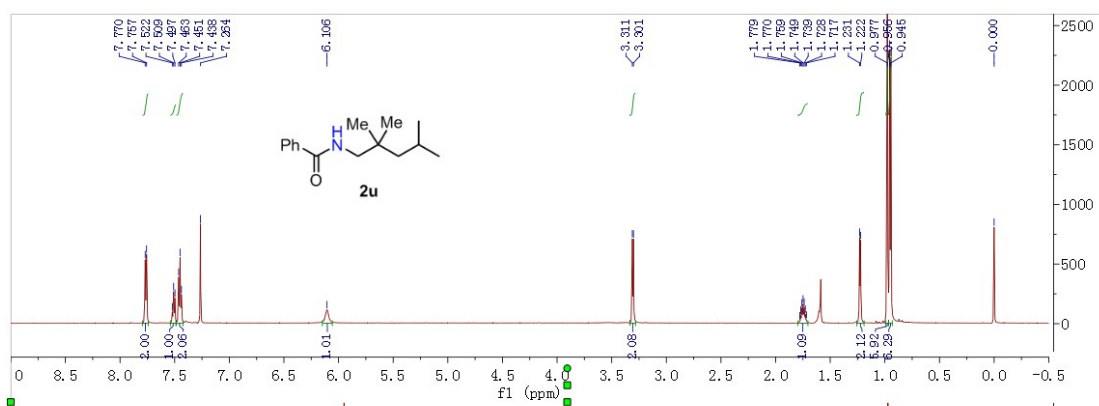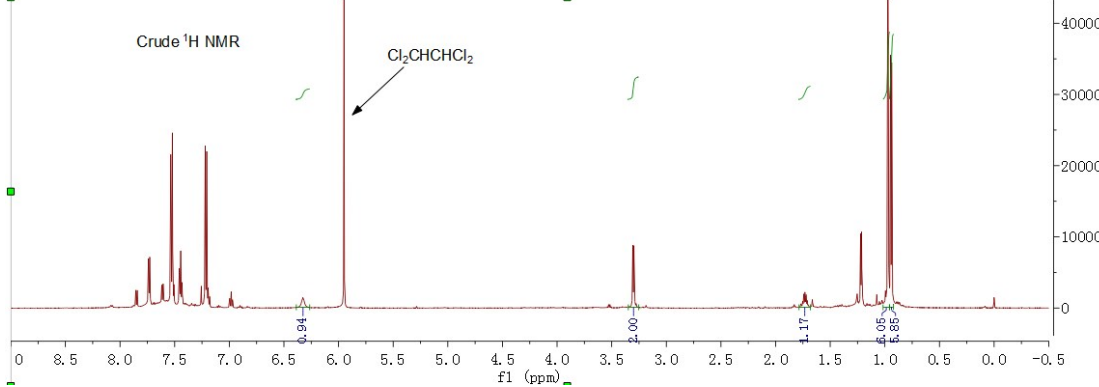

Supplement: SC-009-C8SC01788C-s001.pdf [file SC-009-C8SC01788C-s001.pdf]
